# Supplementary material for: A triarylphosphine–trimethylpiperidine reagent for the one-step derivatization and enrichment of protein post-translational modifications and identification by mass spectrometry
Source: Royal Society of Chemistry journal article supplement (doi:10.1039/c8cc08416e), 2018-01-01
Supplement: c8cc08416e1.xlsx [file c8cc08416e1.xlsx]

## Sheet: Sheet1
O-GlcNAc Proteins	O-GlcNAc Peptides	Log2 Ratio (H/L)	- lg p-value
O75376	SSSGYPPNQGAFSTEQSR	-0.636581	11.5036
Q92541	TASSGSSDK	-0.923413	10.4483
Q9NXV6	STSLASVSQLASK	0.603842	9.78945
Q96LZ7	EMQKIMTSLKR	-0.666707	7.62488
Q86WA8	SLDRKLGAICR	0.850737	7.5825
P51610	VMSVVQTKPVQTSAVTGQASTGPVTQIIQTK	-2.52669	7.50669
Q9UPN6	ETVQTTQSPTPVEK	0.595424	6.79412
Q9Y2Y4	DFSAMTKHLR	1.18984	6.75513
P51649	SCGARRLGSTFPGCR	1.29438	6.73729
O75376	SSHLEVSQASQLLQQQQQQQLR	3.14384	6.68822
P23588	SQSSDTEQQSPTSGGGK	-0.641111	6.65216
O75151	SVDVTDVTKQKDCK	-0.787813	6.52848
P0C881	SSSSKLELSPDVNK	0.680598	6.34673
Q9NXV6	TSSEASVSSSVAK	-0.594811	6.34281
Q9UL36	QELAGTR	-0.651265	6.14568
Q6ZTY9	MRMAPTESTEGR	-0.597768	5.71387
Q8IVF2	DSKFKMPK	-0.735711	5.70538
Q96ER9	TLCSPGPSQPGEK	0.794101	5.47248
Q502W6	SQMSSLR	0.780371	5.25059
Q9GZY8	GTSSDTSLGRVSR	2.2973	5.17218
Q5T8A7	GGGHVRPSTPKK	-0.632038	5.1032
P49790	SSSAGFSFGTGVINSTPAPANTIVTSENK	1.0154	5.06876
A8CG34	APPTLQAETATKPQATSAPSPAPK	0.659727	5.01134
Q16513	DEVDSLMCEKRIFETVNSVR	-1.00271	4.91196
Q9NUQ7	MVISESMDILFR	1.58876	4.88706
P46013	TSDTETEPSK	0.765857	4.86302
Q9BTC0	VLSSLKPAAPSPATAATTAAAASTAASSTASSASK	1.05869	4.75693
P85037	EPAAAVAATATTTPATATTASASASSTGEPEVK	0.990438	4.68894
Q96HC4	ANNSQEPSPQLASSVASTR	-1.24616	4.55481
Q96HC4	KANNSQEPSPQLASSVASTR	-1.24616	4.55481
Q9Y520	AVSEMSTEIGTMISVSSAEYGTNAK	2.4715	4.53121
O76041	DSPEIER	-4.1935	4.47415
Q6MZP7	TITISESGVIGSTLNSTTQTPNK	0.853266	4.42995
Q9H0H5	ISGCDRTVKELK	-2.06468	4.42071
Q9H4G0	DVLTSTYGATAETLSTSTTTHVTK	-0.841894	4.39117
P05387	LASVPAGGAVAVSAAPGSAAPAAGSAPAAAEEK	0.787922	4.38554
O95436	TDNTEAPVTK	-0.870422	4.37112
O43166	ENSTFSINDAASHTSTMSSR	-0.590199	4.28062
Q16186	SQSAAVTPSSTTSSTR	0.605235	4.25379
Q14157	QAFTPSSTMMEVFLQEK	0.992676	4.22908
O15050	VGTQMERVR	1.998	4.13329
Q6P0N0	TPQCQHVSPGMLGSINR	-1.00043	4.12291
Q9H165	MPFSVYSTLEK	-8.28482	4.09532
Q96R05	VIEQNGDSFTIHTNSSLR	0.604667	4.023
Q8WWL7	ESFSQEPSALQKK	-1.04382	3.93695
P51610	TAAAQVGTSVSSATNTSTRPIITVHK	0.814982	3.93166
O15047	GSTPYSQDSAYSSSTTSTSFKPR	1.05593	3.89034
Q13029	MQSMQTPLGKTRAR	-0.806449	3.88991
Q92519	TQDFEELSSIR	-0.840085	3.87428
P49790	STEANVLPPSSIGFTFSVPVAK	0.634803	3.80821
Q68CP9	VSHSPALSSDVRSTNGTAECKTVK	-0.747374	3.80065
P17097	CNKCTKAFGCSSR	-1.09161	3.79385
P31629	YMTTIRAPSPR	-2.29854	3.78251
P51610	HSHAVSTAAMTR	1.33419	3.78091
Q9NYV4	TSAVSSQANSQPPVQVSVK	0.710521	3.76128
O75044	TATAGRSK	-2.9027	3.72533
Q86T90	VTDASISMESLK	-0.907904	3.71234
Q9H2Y7	SLSQKQDPKNISK	-0.7162	3.70159
Q9H8G1	MENLKSGVYPLKEASGCPGADR	-1.88581	3.67187
Q8WZ42	KTLILRAGVTMR	-0.781597	3.61052
Q9GZN7	MATVMAATAAER	0.639342	3.60841
P30041	DINAYNCEEPTEK	0.806501	3.60737
B5MCN3	QELLRDSFRSCELLLR	0.933839	3.60147
Q96FV9	MSPTPPLFSLPEAR	-1.01904	3.54556
Q96ST2	WNVEMESSR	-1.7354	3.53934
Q9UKY1	SQVPAAQPTAETKPATAAVPTSQSVK	-2.54531	3.49704
Q96L91	AVGSPATATPDLVSMATTQGVR	2.37273	3.47118
Q9NPJ6	EKERLGGGLGVAGGNSTR	2.40709	3.44191
Q9Y6X0	MESRETLSSSRQR	-0.74908	3.41343
Q8WWM7	STSTPTSPGPR	1.71748	3.39055
Q9NZM1	SEATDVKSTLAEIEDWLDK	-0.746445	3.38786
Q8NDH2	GTISKDNSWR	-1.51328	3.36027
Q96KR1	QYYQQPTATAAAVAAAAQPQPSVAETYYQTAPK	1.22288	3.33968
Q10713	FETKVTTLDNGLRVASQNK	0.934387	3.32855
Q02386	GFSRSSDFNIHFR	0.978721	3.3185
Q9P266	RSTPRGHGEPQSTSASR	0.6343	3.30217
Q8WZ42	FEISIDGDRHTLR	0.707859	3.29639
P49815	LVTVTTSVGTGTR	0.881186	3.28802
P49790	QQEPVTSTSLVFGK	-2.33289	3.25956
Q6RI45	RISALMWEVR	-0.603758	3.25954
O60318	EEETESREKK	-3.29586	3.25211
P17544	SAAEAVATSVLTQMASQR	1.18515	3.2176
Q9NPG3	TPASSSSALSHPAKPHSVSSAGSSYK	0.594427	3.21248
P08237	IFANTPDSGCVLGMRK	-1.08114	3.20074
Q6NSI4	QPEEHNFSDTKIISLSHLEMTWTNRR	1.82649	3.18591
O15047	SIMQRDLNRK	1.61786	3.16531
Q9UPP1	SRAIVQRGR	0.826131	3.16235
Q9UNF1	ALMASMAR	-0.80256	3.15645
P35658	SPGSTPTTPTSSQAPQK	-0.732273	3.15315
O94913	TEKDVSRK	-0.880361	3.14709
Q99653	LYSRFTSLDKGENGTLSR	-0.94873	3.1418
O14727	CCSWSADGARIMVAAKNK	-0.90869	3.13904
O43432	STIAAPTSSALSSQPIFTTAIDDR	0.649599	3.11595
O94842	GLQLGQTSTATIQPSQQAQIVTR	0.587804	3.1128
Q5TIA1	HDPRWLLPVTPR	-0.677762	3.11023
Q17RS7	KMMGSVMKPHLR	0.605322	3.10309
Q8TF65	SSGEKIGCGRATLR	-0.698367	3.09554
P27540	HSNPTQGATPTWTPTTR	0.666786	3.07841
Q96T58	SRLERYTK	-0.582025	3.04041
O75152	QGEGSSGVSSLLLHPEPVPGPEK	1.93279	3.02166
Q08AG5	CHPSFQMQEKAHTGEK	-1.02997	2.99645
Q5T5U3	SASQGALTSPSVSFSNHR	0.911237	2.98795
P51610	SGTVTVAQQAQVVTTVVGGVTK	1.02907	2.98448
O75113	SAGPSDHIDSSVTGVQR	1.04378	2.9727
O14559	GPSPASSSSSSPPAHPR	0.686214	2.97009
P51003	EQLDTETSTTQSETIQTAASLLASQK	1.83849	2.95543
O60318	SPTSVGAFPSTSAFGQEAGEIVNSGFGK	1.08957	2.93711
Q92620	WETNRMLTSGVVHR	-0.576179	2.92252
P45974	MFKALIGKGHPEFSTNR	-2.14786	2.91524
Q9Y2J4	TLEDSSGTVLHR	0.768181	2.91425
P51610	IPPSSAPTVLSVPAGTTIVK	0.632832	2.84175
Q9BW19	GTLSGAPAPPTRHDFSFDR	0.81355	2.82275
Q10570	YLYLSTMER	1.12969	2.80862
Q6UB98	LVNDDLMQTSFER	0.649771	2.79624
Q96QE5	MSGSVLFTAGER	-0.937899	2.78829
Q9HAY6	TRQPVQTK	-0.644626	2.77844
Q8WVY7	IMMMGTR	-0.834824	2.77391
O95198	SNEWFHVAPMNTR	1.40336	2.70415
Q12830	GQPVSTAVSAPNTVSSTPGQK	0.751118	2.69235
P35658	NNPATPSTAMGSSVPYSTAK	0.59543	2.64021
P17480	LPESPKR	-1.19618	2.61157
P49759	YNHSKMCDSHYLESR	-1.32515	2.58744
Q12830	VMVAPISGSVTTGTK	1.78069	2.57222
P33316	TDIQIALPSGCYGR	1.2952	2.56507
Q9NZN5	LEDYQRRLDTSSLK	-0.955395	2.56119
Q12830	STVTTTTTTVTK	0.582261	2.55809
P51610	YDIPATAATATSPTPNPVPSVPANPPK	1.15845	2.53377
Q86TC9	IQKPNEVSSPPTTSAVIPPAVPQAQHLVAQPR	-2.4208	2.52508
Q01167	SVTIGRNSSQGSVDVSMGHSSFISR	0.828101	2.52358
Q8IYD8	ESNIAVNPSTVKK	-0.58112	2.52204
Q92793	SISPSALQDLLR	-0.69631	2.51957
Q6PI77	LLLNMSENPTAAR	1.51621	2.5169
Q9UHR5	KGTTTNATSTTTTTASTAVADAQK	0.820177	2.49831
Q9UHR5	GTTTNATSTTTTTASTAVADAQK	0.820177	2.49831
Q96HC4	EVVKPVPITSPAVSK	-0.678536	2.48647
Q5JRC9	TSSLGPEPPKTR	-0.873709	2.48557
P62072	KLTELSMQDEELMKR	-2.26377	2.46387
P02545	ASASGSGAQVGGPISSGSSASSVTVTR	0.717949	2.46092
Q6P6B7	ATSTHLTALHYAAK	-1.36043	2.45008
Q9Y4B5	LLADSHSLVMDLR	-1.44914	2.4448
Q2TAZ0	TFQSRTLALSR	-1.73692	2.43967
Q9Y520	ESVTDYTTPSSSLPNTVATNNTK	0.767176	2.43323
Q8IWZ8	AQTSTDAPTSAPSAPPSTPTPSAGK	0.792089	2.4061
Q6UN15	MGLEVIPVTSTTNK	0.951754	2.38255
P78559	SPWASDFKDFQESSPQK	-0.897267	2.35039
Q9P2N5	AANIVIQTEPPVPVSINSNITR	1.56478	2.34661
Q9UHV7	MSDSATK	0.915663	2.34412
Q09472	MESTETEERSTELK	-0.693177	2.32348
O43299	MPSVAQFVLTPSTEVCSPR	0.699068	2.25609
Q8N1G0	SFCSAPSLRRHVR	-3.85425	2.23932
P51610	TIPMSAIITQAGATGVTSSPGIK	1.39505	2.20281
Q15750	VYPVSVPYSSAQSTSK	0.584352	2.11006
Q9C0D5	MSSSTSSLTSSSSFSDGFK	0.706614	2.10361
