# Supplementary material for: A triarylphosphine–trimethylpiperidine reagent for the one-step derivatization and enrichment of protein post-translational modifications and identification by mass spectrometry
Source: Royal Society of Chemistry journal article supplement (doi:10.1039/c8cc08416e), 2018-01-01
Supplement: c8cc08416e2.xlsx [file c8cc08416e2.xlsx]

## Sheet: Sheet1
O-GlcNAc Proteins	Protein names	O-GlcNAc Peptides	Localization prob	Mass	Charges	|Mass error [ppm]|	Score	DFIs
P55196	Afadin (ALL1-fused gene from chromosome 6 protein) (Protein AF-6) (Afadin adherens junction formation factor)	AQS*NGPEKQEK	1	1214.59	2	3.2262	45.433	yes
Q96BY6	Dedicator of cytokinesis protein 10 (Zizimin-3)	DALEET*RR	1	988.494	2	4.7234	45.908	yes
Q14185	Dedicator of cytokinesis protein 1 (180 kDa protein downstream of CRK) (DOCK180)	LLT*QFPNAEKMK	1	1418.76	3	2.3187	44.543	yes
Q5TB30	DEP domain-containing protein 1A	S*LPLKEKR	1	969.597	2	2.4808	52.716	yes
O14775	Guanine nucleotide-binding protein subunit beta-5 (Gbeta5) (Transducin beta chain 5)	T*LKGHGNKVLCMDWCK	1	1831.89	2	1.0489	45.207	yes
P29353	SHC-transforming protein 1 (SHC-transforming protein 3) (SHC-transforming protein A) (Src homology 2 domain-containing-transforming protein C1) (SH2 domain protein C1)	VEGGQLGGEEWT*R	1	1416.66	2	1.2276	45.438	yes
Q8TCT1	Phosphoethanolamine/phosphocholine phosphatase (EC 3.1.3.75)	AAGHHS*LFRR	1	1150.61	2	5.3917	43.419	yes
Q9NX14	NADH dehydrogenase [ubiquinone] 1 beta subcomplex subunit 11, mitochondrial (Complex I-ESSS) (CI-ESSS) (NADH-ubiquinone oxidoreductase ESSS subunit) (Neuronal protein 17.3) (Np17.3) (p17.3)	AAGLFGLS*AR	1	961.535	3	4.3586	43.68	yes
Q9NR09	Baculoviral IAP repeat-containing protein 6 (EC 2.3.2.27) (BIR repeat-containing ubiquitin-conjugating enzyme) (BRUCE) (RING-type E3 ubiquitin transferase BIRC6) (Ubiquitin-conjugating BIR domain enzyme apollon) (APOLLON)	AAMKPKPLS*VLK	1	1281.78	2	3.8295	42.388	yes
Q96A19	Coiled-coil domain-containing protein 102A	AAQMEKT*MRR	1	1220.61	3	5.6767	52.255	yes
O60504	Vinexin (SH3-containing adapter molecule 1) (SCAM-1) (Sorbin and SH3 domain-containing protein 3)	AARLKFDFQAQS*PK	1	1605.86	3	3.0982	59.116	yes
P55263	Adenosine kinase (AK) (EC 2.7.1.20) (Adenosine 5'-phosphotransferase)	AAT*FFGCIGIDKFGEILK	1	1929.01	3	3.1167	45.237	yes
P17040	Zinc finger and SCAN domain-containing protein 20 (Zinc finger protein 31) (Zinc finger protein 360) (Zinc finger protein KOX29)	AAVRAMGT*VR	1	1030.57	2	3.4236	55.064	yes
P51610	Host cell factor 1 (HCF) (HCF-1) (C1 factor) (CFF) (VCAF) (VP16 accessory protein) [Cleaved into: HCF N-terminal chain 1; HCF N-terminal chain 2; HCF N-terminal chain 3; HCF N-terminal chain 4; HCF N-terminal chain 5; HCF N-terminal chain 6; HCF C-terminal chain 1; HCF C-terminal chain 2; HCF C-terminal chain 3; HCF C-terminal chain 4; HCF C-terminal chain 5; HCF C-terminal chain 6]	ACAAGT*PAVIR	1	1028.54	3	0.58864	70.628	yes
Q9Y577	E3 ubiquitin-protein ligase TRIM17 (EC 2.3.2.27) (RING finger protein 16) (RING-type E3 ubiquitin transferase TRIM17) (Testis RING finger protein) (Tripartite motif-containing protein 17)	ACIQLS*WEK	1	1076.53	2	0.80609	54.784	yes
Q03989	AT-rich interactive domain-containing protein 5A (ARID domain-containing protein 5A) (Modulator recognition factor 1) (MRF-1)	ACWVS*PMAK	1	991.462	3	0.65899	58.981	yes
Q14469	Transcription factor HES-1 (Class B basic helix-loop-helix protein 39) (bHLHb39) (Hairy and enhancer of split 1) (Hairy homolog) (Hairy-like protein) (hHL)	ADILEMT*VKHLR	1	1424.78	3	2.4072	59.294	yes
Q96BY7	Autophagy-related protein 2 homolog B	ADMKPGAFQRRS*K	1	1490.78	3	2.1641	46.88	yes
Q6Q759	Sperm-associated antigen 17 (Projection protein PF6 homolog)	ADS*HEKKPKK	1	1166.64	2	2.4051	43.651	yes
Q6ZN17	Protein lin-28 homolog B (Lin-28B)	AEGGAS*KGGGEEPGK	1	1329.62	3	2.5525	50.897	yes
Q86V25	Vasohibin-2 (Vasohibin-like protein)	AELMDKPLT*FR	1	1319.69	3	0.62688	48.467	yes
Q9UBZ9	DNA repair protein REV1 (EC 2.7.7.-) (Alpha integrin-binding protein 80) (AIBP80) (Rev1-like terminal deoxycytidyl transferase)	AENDGWET*WGGYMAAK	1	1784.75	3	5.6145	44.831	yes
P30622	CAP-Gly domain-containing linker protein 1 (Cytoplasmic linker protein 1) (Cytoplasmic linker protein 170 alpha-2) (CLIP-170) (Reed-Sternberg intermediate filament-associated protein) (Restin)	AEQS*QQEAAKK	1	1216.6	3	3.5378	58.32	yes
Q9NPD3	Exosome complex component RRP41 (Exosome component 4) (Ribosomal RNA-processing protein 41) (p12A)	AGLELLS*DQGYR	1	1320.67	3	2.6234	47.302	yes
Q709C8	Vacuolar protein sorting-associated protein 13C	AGQIDKLT*LK	1	1085.64	3	3.9208	55.461	yes
Q12955	Ankyrin-3 (ANK-3) (Ankyrin-G)	AHAAS*QLKK	1	952.545	3	5.9814	54.157	yes
Q08AG5	Zinc finger protein 844	AHT*GEKLYDCK	1	1263.59	3	3.165	47.228	yes
Q0VFZ6	Coiled-coil domain-containing protein 173	AIENAKQYQFYQT*ER	1	1887.91	3	5.49	53.255	yes
P49750	YLP motif-containing protein 1 (Nuclear protein ZAP3) (ZAP113)	AIGFVVGQT*DWEK	1	1448.73	3	3.8043	51.286	yes
Q6WCQ1	Myosin phosphatase Rho-interacting protein (M-RIP) (Rho-interacting protein 3) (RIP3) (p116Rip)	AKADCDIS*RLK	1	1218.64	3	1.2321	54.199	yes
O95425	Supervillin (Archvillin) (p205/p250)	AKLS*VAAKR	1	942.597	2	3.3705	53.567	yes
Q6ZTR7	Protein FAM92B	AKMQGVYGHYDT*R	1	1524.71	3	1.8239	50.149	yes
O00203	AP-3 complex subunit beta-1 (Adaptor protein complex AP-3 subunit beta-1) (Adaptor-related protein complex 3 subunit beta-1) (Beta-3A-adaptin) (Clathrin assembly protein complex 3 beta-1 large chain)	AKQENS*AKK	1	1002.55	2	0.35535	68.224	yes
Q6NSZ9	Zinc finger and SCAN domain-containing protein 25 (Zinc finger protein 498)	ALAAMVEDLT*ER	1	1317.66	3	5.5375	54.198	yes
Q96Q15	Serine/threonine-protein kinase SMG1 (SMG-1) (hSMG-1) (EC 2.7.11.1) (61E3.4) (Lambda/iota protein kinase C-interacting protein) (Lambda-interacting protein)	ALAT*KDMRK	1	1032.58	2	5.4735	54.982	yes
P78559	Microtubule-associated protein 1A (MAP-1A) (Proliferation-related protein p80) [Cleaved into: MAP1A heavy chain; MAP1 light chain LC2]	ALEQKDT*ALEQK	1	1372.72	3	4.6584	49.298	yes
Q86VI3	Ras GTPase-activating-like protein IQGAP3	ALES*AMAK	1	819.416	2	1.2808	64.207	yes
Q9UNF1	Melanoma-associated antigen D2 (11B6) (Breast cancer-associated gene 1 protein) (BCG-1) (Hepatocellular carcinoma-associated protein JCL-1) (MAGE-D2 antigen)	ALMAS*MAR	1	849.42	2	2.9179	55.531	yes
Q9Y232	Chromodomain Y-like protein (CDY-like) (Crotonyl-CoA hydratase) (EC 4.2.1.-)	ALVIGKDHES*K	1	1195.66	3	2.122	43.77	yes
Q68D10	Protein SPT2 homolog (Protein KU002155) (SPT2 domain-containing protein 1)	AMAKRT*K	1	804.464	2	3.284	50.632	yes
P46013	Proliferation marker protein Ki-67 (Antigen identified by monoclonal antibody Ki-67) (Antigen KI-67) (Antigen Ki67)	AMLT*PKPAGGDEK	1	1313.66	2	1.9828	64.64	yes
Q8WZ42	Titin (EC 2.7.11.1) (Connectin) (Rhabdomyosarcoma antigen MU-RMS-40.14)	APPPRAEVS*K	1	1050.58	2	2.2003	49.06	yes
Q9BR11	Zinc finger SWIM domain-containing protein 1	APWS*AALQRK	1	1126.62	3	2.5755	57.225	yes
Q5VTR2	E3 ubiquitin-protein ligase BRE1A (BRE1-A) (hBRE1) (EC 2.3.2.27) (RING finger protein 20) (RING-type E3 ubiquitin transferase BRE1A)	AQES*QKEMKLLLDMYR	1	1982	3	4.1676	49.216	yes
Q9NR12	PDZ and LIM domain protein 7 (LIM mineralization protein) (LMP) (Protein enigma)	AQPVQS*KPQK	1	1109.62	3	0.020656	109.72	yes
Q8N0Z6	Tetratricopeptide repeat protein 5 (TPR repeat protein 5) (Stress-responsive activator of p300) (Strap)	AQVLMLT*GK	1	959.547	2	2.5133	58.511	yes
Q9BUE0	Mediator of RNA polymerase II transcription subunit 18 (Mediator complex subunit 18) (p28b)	ARRS*MDR	1	890.45	2	3.7879	43.124	yes
P08151	Zinc finger protein GLI1 (Glioma-associated oncogene) (Oncogene GLI)	ARYAS*AR	1	793.419	2	1.7906	55.676	yes
P24534	Elongation factor 1-beta (EF-1-beta)	AS*LPGVKKALGK	1	1167.73	2	3.9623	47.302	yes
Q5JPB2	Zinc finger protein 831	AS*PHGGKKAR	1	1007.56	2	3.6718	57.175	yes
Q9H3H1	tRNA dimethylallyltransferase (EC 2.5.1.75) (Isopentenyl-diphosphate:tRNA isopentenyltransferase) (IPP transferase) (IPPT) (hGRO1) (tRNA isopentenyltransferase) (IPTase)	AS*VAAAR	1	644.361	2	4.4313	67.035	yes
Q9Y2S2	Lambda-crystallin homolog (EC 1.1.1.45) (L-gulonate 3-dehydrogenase) (Gul3DH)	AT*AEKVNQDMCMK	1	1467.65	3	3.4049	42.257	yes
Q14003	Potassium voltage-gated channel subfamily C member 3 (KSHIIID) (Voltage-gated potassium channel subunit Kv3.3)	AT*GAPPLPPQDWR	1	1404.71	3	0.15324	41.242	yes
Q496J9	Synaptic vesicle glycoprotein 2C	AT*GFGFLNALCK	1	1240.63	3	4.4754	46.955	yes
P15735	Phosphorylase b kinase gamma catalytic chain, liver/testis isoform (PHK-gamma-LT) (PHK-gamma-T) (EC 2.7.11.19) (PSK-C3) (Phosphorylase kinase subunit gamma-2)	AT*GHEFAVK	1	958.487	2	1.5144	41.427	yes
P53671	LIM domain kinase 2 (LIMK-2) (EC 2.7.11.1)	AT*GKVMVMKELIR	1	1474.84	3	5.0359	64.04	yes
Q96M15	Putative uncharacterized protein IGF2BP2-AS1 (IGF2BP2 antisense RNA 1) (IGF2BP2 antisense gene protein 1)	AT*PLDNCLRPFPDPMVK	1	1912.95	4	2.4439	44.807	yes
Q99590	Protein SCAF11 (CTD-associated SR protein 11) (Renal carcinoma antigen NY-REN-40) (SC35-interacting protein 1) (SR-related and CTD-associated factor 11) (SRSF2-interacting protein) (Serine/arginine-rich splicing factor 2-interacting protein) (Splicing factor, arginine/serine-rich 2-interacting protein) (Splicing regulatory protein 129) (SRrp129)	AVDKVCHS*K	1	985.501	2	5.7599	56.258	yes
O00487	26S proteasome non-ATPase regulatory subunit 14 (EC 3.4.19.-) (26S proteasome regulatory subunit RPN11) (26S proteasome-associated PAD1 homolog 1)	AVEEEDKMT*PEQLAIKNVGK	1	2228.14	3	4.5736	44.391	yes
Q8TEP8	Centrosomal protein of 192 kDa (Cep192)	AVGFKDS*QKK	1	1106.61	3	3.1627	56.087	yes
Q6IQ23	Pleckstrin homology domain-containing family A member 7 (PH domain-containing family A member 7)	AVHT*GMR	1	770.386	2	4.1426	49.423	yes
P46934	E3 ubiquitin-protein ligase NEDD4 (EC 2.3.2.26) (Cell proliferation-inducing gene 53 protein) (HECT-type E3 ubiquitin transferase NEDD4) (Neural precursor cell expressed developmentally down-regulated protein 4) (NEDD-4)	AVLMMDS*EK	1	1022.48	3	4.6101	50.04	yes
Q7Z589	BRCA2-interacting transcriptional repressor EMSY	AVVPVS*K	1	698.433	3	0.031471	76.1	yes
O75909	Cyclin-K	AVVVS*PK	1	698.433	3	0.41183	56.81	yes
Q96ME7	Zinc finger protein 512	CGKGAAELEKMT*LK	1	1477.76	3	0.80994	49.333	yes
Q86WH2	Ras association domain-containing protein 3	CHREDQVYACKLS*DR	1	1821.83	3	1.8304	44.246	yes
P51523	Zinc finger protein 84 (Zinc finger protein HPF2)	CIECGKAFS*QK	1	1212.56	2	2.7629	41.164	yes
B4DU55	Zinc finger protein 879	CKECGKT*FK	1	1042.49	3	4.3694	55.112	yes
P40939	Trifunctional enzyme subunit alpha, mitochondrial (78 kDa gastrin-binding protein) (TP-alpha) [Includes: Long-chain enoyl-CoA hydratase (EC 4.2.1.17); Long chain 3-hydroxyacyl-CoA dehydrogenase (EC 1.1.1.211)]	CLAPMMS*EVIRILQEGVDPK	1	2228.14	4	1.9994	43.208	yes
Q86UA6	RPA-interacting protein (hRIP)	CLERMRNS*R	1	1163.57	2	5.8698	87.639	yes
Q6UXM1	Leucine-rich repeats and immunoglobulin-like domains protein 3 (LIG-3)	CLGDLLDCS*RK	1	1221.58	2	1.7482	47.302	yes
Q9UF56	F-box/LRR-repeat protein 17 (F-box and leucine-rich repeat protein 17) (F-box only protein 13)	CPGLLRYT*AYR	1	1311.68	3	0.38545	56.548	yes
Q96RN5	Mediator of RNA polymerase II transcription subunit 15 (Activator-recruited cofactor 105 kDa component) (ARC105) (CTG repeat protein 7a) (Mediator complex subunit 15) (Positive cofactor 2 glutamine/Q-rich-associated protein) (PC2 glutamine/Q-rich-associated protein) (TPA-inducible gene 1 protein) (TIG-1) (Trinucleotide repeat-containing gene 7 protein)	CPLKT*LQKCEIALEK	1	1715.93	3	4.9047	59.227	yes
P0C7X0	Putative protein FAM90A24P	CPMKCWKAALVPAT*LGK	1	1815.96	3	5.2154	51.971	yes
P07315	Gamma-crystallin C (Gamma-C-crystallin) (Gamma-crystallin 2-1) (Gamma-crystallin 3)	CQDWGAMDAKAGS*LRR	1	1763.82	3	3.8181	56.121	yes
Q9Y330	Zinc finger and BTB domain-containing protein 12 (Protein G10)	CT*KCPEVFQGVEK	1	1466.69	3	4.9892	54.859	yes
Q03924	Zinc finger protein 117 (Provirus-linked krueppel) (h-PLK) (Zinc finger protein HPF9)	CVRAFNQAS*K	1	1122.56	2	2.7031	53.557	yes
Q9H8M7	Ubiquitin carboxyl-terminal hydrolase MINDY-3 (EC 3.4.19.12) (Dermal papilla-derived protein 5) (Deubiquitinating enzyme MINDY-3) (Protein CARP)	DAVLDQYS*MWGNK	1	1525.69	3	5.3119	44.925	yes
Q9BXL7	Caspase recruitment domain-containing protein 11 (CARD-containing MAGUK protein 1) (Carma 1)	DDNYNLAMRYAQLS*EEK	1	2058.93	3	4.0944	51.03	yes
Q9HAU5	Regulator of nonsense transcripts 2 (Nonsense mRNA reducing factor 2) (Up-frameshift suppressor 2 homolog) (hUpf2)	DDT*KEAK	1	805.382	2	2.4066	60.799	yes
Q68DA7	Formin-1 (Limb deformity protein homolog)	DEMEKPAKRT*CK	1	1434.7	2	5.2183	54.259	yes
Q92830	Histone acetyltransferase KAT2A (EC 2.3.1.48) (General control of amino acid synthesis protein 5-like 2) (Histone acetyltransferase GCN5) (hGCN5) (Histone succinyltransferase KAT2A) (EC 2.3.1.-) (Lysine acetyltransferase 2A) (STAF97)	DET*ARLEERR	1	1273.64	2	1.3807	56.205	yes
Q8WZ42	Titin (EC 2.7.11.1) (Connectin) (Rhabdomyosarcoma antigen MU-RMS-40.14)	DEVILQCEIS*K	1	1275.64	3	5.0057	51.998	yes
Q8WZ42	Titin (EC 2.7.11.1) (Connectin) (Rhabdomyosarcoma antigen MU-RMS-40.14)	DGKELEET*AARMEIK	1	1718.85	3	3.3008	46.543	yes
O95817	BAG family molecular chaperone regulator 3 (BAG-3) (Bcl-2-associated athanogene 3) (Bcl-2-binding protein Bis) (Docking protein CAIR-1)	DGVRKVQT*ILEK	1	1384.8	3	5.4851	50.024	yes
Q7Z403	Transmembrane channel-like protein 6 (Epidermodysplasia verruciformis protein 1) (Protein LAK-4)	DHMLRGMPLS*LAEKR	1	1752.91	3	0.82396	54.412	yes
P30041	Peroxiredoxin-6 (EC 1.11.1.15) (1-Cys peroxiredoxin) (1-Cys PRX) (24 kDa protein) (Acidic calcium-independent phospholipase A2) (aiPLA2) (EC 3.1.1.4) (Antioxidant protein 2) (Liver 2D page spot 40) (Non-selenium glutathione peroxidase) (NSGPx) (Red blood cells page spot 12)	DINAYNCEEPT*EK	1	1524.64	2;3	0.18676	75.764	yes
Q6IEG0	U11/U12 small nuclear ribonucleoprotein 48 kDa protein (U11/U12 snRNP 48 kDa protein) (U11/U12-48K)	DKDKNCES*R	1	1093.48	3	2.1134	50.353	yes
Q5SW79	Centrosomal protein of 170 kDa (Cep170) (KARP-1-binding protein) (KARP1-binding protein)	DKQDADRPLS*KMNR	1	1672.83	2;3	3.3683	66.022	yes
Q07617	Sperm-associated antigen 1 (HSD-3.8) (Infertility-related sperm protein Spag-1)	DKT*APFNKEK	1	1176.61	2	3.6372	46.462	yes
Q92878	DNA repair protein RAD50 (hRAD50) (EC 3.6.-.-)	DLDIYYKT*LDQAIMK	1	1828.93	2	5.0346	52.071	yes
Q7Z6K3	Protein prenyltransferase alpha subunit repeat-containing protein 1	DLHLGKLALT*KFPK	1	1579.94	2	3.7075	47.062	yes
P08133	Annexin A6 (67 kDa calelectrin) (Annexin VI) (Annexin-6) (Calphobindin-II) (CPB-II) (Chromobindin-20) (Lipocortin VI) (Protein III) (p68) (p70)	DLIADLKYELT*GKFER	1	1910.01	3	0.60565	45.992	yes
P52756	RNA-binding protein 5 (Protein G15) (Putative tumor suppressor LUCA15) (RNA-binding motif protein 5) (Renal carcinoma antigen NY-REN-9)	DMERWAKS*LNK	1	1376.69	3	5.604	47.302	yes
Q9HAP2	MLX-interacting protein (Class E basic helix-loop-helix protein 36) (bHLHe36) (Transcriptional activator MondoA)	DMFDEYVKT*R	1	1302.59	3	4.586	64.654	yes
P36639	7,8-dihydro-8-oxoguanine triphosphatase (EC 3.6.1.55) (2-hydroxy-dATP diphosphatase) (EC 3.6.1.56) (8-oxo-dGTPase) (Nucleoside diphosphate-linked moiety X motif 1) (Nudix motif 1)	DMWPDDS*YWFPLLLQKK	1	2181.06	3	1.7991	49.216	yes
Q6Q759	Sperm-associated antigen 17 (Projection protein PF6 homolog)	DNAEKEDS*R	1	1062.46	3	1.7795	62.463	yes
Q5T160	Probable arginine--tRNA ligase, mitochondrial (EC 6.1.1.19) (Arginyl-tRNA synthetase) (ArgRS)	DNDHS*RPDIQVQAK	1	1621.78	3	0.59543	51.495	yes
O95373	Importin-7 (Imp7) (Ran-binding protein 7) (RanBP7)	DPNT*IIEALR	1	1140.61	2	0.8519	64.121	yes
Q8WXH0	Nesprin-2 (KASH domain-containing protein 2) (KASH2) (Nuclear envelope spectrin repeat protein 2) (Nucleus and actin connecting element protein) (Protein NUANCE) (Synaptic nuclear envelope protein 2) (Syne-2)	DPT*VPAVKHR	1	1118.62	2	5.514	41.684	yes
Q9UK32	Ribosomal protein S6 kinase alpha-6 (S6K-alpha-6) (EC 2.7.11.1) (90 kDa ribosomal protein S6 kinase 6) (p90-RSK 6) (p90RSK6) (Ribosomal S6 kinase 4) (RSK-4) (pp90RSK4)	DRNET*MNMILKAK	1	1562.79	3	0.047183	74.853	yes
Q6PCT2	F-box/LRR-repeat protein 19 (F-box and leucine-rich repeat protein 19)	DS*GEGPGRR	1	929.432	2	5.2571	68.786	yes
O76041	Nebulette (Actin-binding Z-disk protein)	DS*PEIER	1	844.393	2	5.9866	72.138	yes
Q96HJ9	Protein FMC1 homolog (ATP synthase assembly factor FMC1, mitochondrial) (Formation of mitochondrial complex V assembly factor 1 homolog)	DT*AAYRYLVK	1	1198.63	3	3.541	52.579	yes
Q8TAF3	WD repeat-containing protein 48 (USP1-associated factor 1) (WD repeat endosomal protein) (p80)	DT*NNNVAYWDVLK	1	1550.74	3	1.8089	44.252	yes
O14526	F-BAR domain only protein 1	DVLRYGEEQLKT*HK	1	1714.9	3	3.4438	69.03	yes
Q92561	Phytanoyl-CoA hydroxylase-interacting protein (Phytanoyl-CoA hydroxylase-associated protein 1) (PAHX-AP1) (PAHXAP1)	DVPT*KLVAK	1	969.586	2	0.89308	49.418	yes
O95466	Formin-like protein 1 (CLL-associated antigen KW-13) (Leukocyte formin)	EAAAQEAGADT*PGK	1	1314.61	3	2.4136	59.579	yes
P03372	Estrogen receptor (ER) (ER-alpha) (Estradiol receptor) (Nuclear receptor subfamily 3 group A member 1)	EAGPPAFYRPNS*DNRR	1	1845.89	4	4.5094	52.101	yes
Q5VT06	Centrosome-associated protein 350 (Cep350) (Centrosome-associated protein of 350 kDa)	EAT*EQKNKR	1	1102.57	2	0.64985	47.971	yes
Q8N3J2	Methyltransferase-like protein 4 (EC 2.1.1.-)	ECQQS*NEKEDLMNGVK	1	1850.81	3	5.5657	55.094	yes
P15924	Desmoplakin (DP) (250/210 kDa paraneoplastic pemphigus antigen)	EDDS*KNLR	1	975.462	2	1.4887	57.177	yes
Q13287	N-myc-interactor (Nmi) (N-myc and STAT interactor)	EDIPET*KMK	1	1089.54	2	0.25083	62.582	yes
Q6UX04	Peptidyl-prolyl cis-trans isomerase CWC27 homolog (PPIase CWC27) (EC 5.2.1.8) (Antigen NY-CO-10) (Serologically defined colon cancer antigen 10)	EDQT*LALLNQFK	1	1418.74	3	5.7619	50.897	yes
O95613	Pericentrin (Kendrin) (Pericentrin-B)	EDWES*EK	1	921.372	2	4.6216	54.611	yes
Q8NC51	Plasminogen activator inhibitor 1 RNA-binding protein (PAI1 RNA-binding protein 1) (PAI-RBP1) (SERPINE1 mRNA-binding protein 1)	EEGPKEMT*LDEWK	1	1590.72	3	1.3626	54.281	yes
P82970	High mobility group nucleosome-binding domain-containing protein 5 (Nucleosome-binding protein 1)	EENIEDAT*EK	1	1176.51	3	2.2242	51.436	yes
Q8IYW2	Cilia- and flagella-associated protein 46 (Tetratricopeptide repeat protein 40)	EET*EGGVKK	1	975.487	3	2.9018	47.844	yes
P46736	Lys-63-specific deubiquitinase BRCC36 (EC 3.4.19.-) (BRCA1-A complex subunit BRCC36) (BRCA1/BRCA2-containing complex subunit 3) (BRCA1/BRCA2-containing complex subunit 36) (BRISC complex subunit BRCC36)	EEVMGLCIGELNDDT*R	1	1792.8	3	1.067	47.774	yes
P51587	Breast cancer type 2 susceptibility protein (Fanconi anemia group D1 protein)	EFANRCLS*PER	1	1320.62	3	1.8935	55.353	yes
P23508	Colorectal mutant cancer protein (Protein MCC)	EFEVET*ER	1	1037.47	3	3.0346	52.403	yes
Q9Y2H9	Microtubule-associated serine/threonine-protein kinase 1 (EC 2.7.11.1) (Syntrophin-associated serine/threonine-protein kinase)	EGHLVKT*DIPRYIIR	1	1809.03	3	2.3839	50.077	yes
Q8IVF2	Protein AHNAK2	EHLPKVEMPS*LKMPK	1	1762.95	3	4.5471	56.139	yes
Q6ZW76	Ankyrin repeat and SAM domain-containing protein 3	EIGIT*LFGPK	1	1073.61	3	3.4306	56.258	yes
Q9BWF2	E3 ubiquitin-protein ligase TRAIP (EC 2.3.2.27) (RING finger protein 206) (RING-type E3 ubiquitin transferase TRAIP) (TRAF-interacting protein)	EIMS*LKKK	1	975.579	3	0.01968	57.59	yes
Q07864	DNA polymerase epsilon catalytic subunit A (EC 2.7.7.7) (DNA polymerase II subunit A)	EIS*PAVKKNR	1	1140.66	3	5.9266	49.28	yes
A6NK53	Zinc finger protein 233	EKAFS*HNNCGK	1	1233.56	2	5.3157	56.404	yes
Q502W6	von Willebrand factor A domain-containing protein 3B (VWA domain-containing protein 3B)	EKCKWYS*ER	1	1227.57	3	2.5672	52.255	yes
Q6AZW8	Zinc finger protein 660	EKPYKCS*ECGK	1	1270.57	3	0.017566	51.762	yes
O14709	Zinc finger protein 197 (Zinc finger protein with KRAB and SCAN domains 9) (ZnF20) (pVHL-associated KRAB domain-containing protein)	EKPYKCT*ECGK	1	1284.58	3	3.1707	64.73	yes
P17029	Zinc finger protein with KRAB and SCAN domains 1 (Zinc finger protein 139) (Zinc finger protein 36) (Zinc finger protein KOX18)	EKPYKCT*KCGK	1	1283.64	2	3.5246	53.567	yes
Q14494	Endoplasmic reticulum membrane sensor NFE2L1 (Locus control region-factor 1) (LCR-F1) (Nuclear factor erythroid 2-related factor 1) (NF-E2-related factor 1) (NFE2-related factor 1) (Nuclear factor, erythroid derived 2, like 1) (Protein NRF1, p120 form) (Transcription factor 11) (TCF-11) [Cleaved into: Transcription factor NRF1 (Protein NRF1, p110 form)]	EKQADFLDKQMS*R	1	1594.78	3	0.27201	79.492	yes
Q9NQY0	Bridging integrator 3	EKT*GPVLAK	1	941.555	3	4.1007	42.19	yes
P35240	Merlin (Moesin-ezrin-radixin-like protein) (Neurofibromin-2) (Schwannomerlin) (Schwannomin)	EKVEYMEKS*K	1	1269.63	4	0.10979	65.809	yes
Q86VE0	Myb-related transcription factor, partner of profilin (Myb-related protein p42POP) (Partner of profilin)	ELAGT*LR	1	758.429	2	4.6147	94.262	yes
P54098	DNA polymerase subunit gamma-1 (EC 2.7.7.7) (Mitochondrial DNA polymerase catalytic subunit) (PolG-alpha)	ELFVKGT*MK	1	1051.57	2	5.1574	47.187	yes
Q9ULD9	Zinc finger protein 608 (Renal carcinoma antigen NY-REN-36)	ELGKEET*K	1	932.481	3	0.22276	49.423	yes
Q9C0D3	Protein zyg-11 homolog B	ELKHLNHLDIS*DDK	1	1675.85	3	5.7479	59.116	yes
Q9P2P5	E3 ubiquitin-protein ligase HECW2 (EC 2.3.2.26) (HECT, C2 and WW domain-containing protein 2) (HECT-type E3 ubiquitin transferase HECW2) (NEDD4-like E3 ubiquitin-protein ligase 2)	ELKPGGANIPVT*EK	1	1451.8	3	1.7073	43.03	yes
Q03468	DNA excision repair protein ERCC-6 (EC 3.6.4.-) (ATP-dependent helicase ERCC6) (Cockayne syndrome protein CSB)	ELLRNLCT*FHR	1	1400.73	3	2.0326	55.353	yes
Q9H3K6	BolA-like protein 2	ELS*AEYLREKLQR	1	1633.88	2	5.6533	44.312	yes
O75150	E3 ubiquitin-protein ligase BRE1B (BRE1-B) (EC 2.3.2.27) (95 kDa retinoblastoma-associated protein) (RBP95) (RING finger protein 40) (RING-type E3 ubiquitin transferase BRE1B)	EMKLLLDMYKS*APK	1	1665.88	3	5.5435	61.186	yes
Q9C037	E3 ubiquitin-protein ligase TRIM4 (EC 2.3.2.27) (RING finger protein 87) (RING-type E3 ubiquitin transferase TRIM4) (Tripartite motif-containing protein 4)	EMLKRFQVAVNLAEDT*AHPK	1	2296.2	3	2.6002	40.693	yes
O00555	Voltage-dependent P/Q-type calcium channel subunit alpha-1A (Brain calcium channel I) (BI) (Calcium channel, L type, alpha-1 polypeptide isoform 4) (Voltage-gated calcium channel subunit alpha Cav2.1)	EMMAIWPNLS*QK	1	1446.7	3	0.54302	43.68	yes
Q8N3A8	Poly [ADP-ribose] polymerase 8 (PARP-8) (EC 2.4.2.30) (ADP-ribosyltransferase diphtheria toxin-like 16) (ARTD16)	EMT*QAPYLEIK	1	1321.66	2	1.721	48.229	yes
Q5VZF2	Muscleblind-like protein 2 (Muscleblind-like protein 1) (Muscleblind-like protein-like) (Muscleblind-like protein-like 39)	ENCKYLHPPT*HLK	1	1578.8	3	1.9919	45.115	yes
Q15075	Early endosome antigen 1 (Endosome-associated protein p162) (Zinc finger FYVE domain-containing protein 2)	ENIS*LLEKER	1	1229.66	3	5.2904	63.966	yes
P30414	NK-tumor recognition protein (NK-TR protein) (Natural-killer cells cyclophilin-related protein) [Includes: Putative peptidyl-prolyl cis-trans isomerase (PPIase) (EC 5.2.1.8) (Rotamase)]	ENLKREHT*K	1	1153.62	3	3.8092	49.418	yes
Q8N3R9	MAGUK p55 subfamily member 5	EPEKS*GKLWCAK	1	1374.7	3	3.2266	51.998	yes
Q96IT1	Zinc finger protein 496 (Zinc finger protein with KRAB and SCAN domains 17)	EPLENGKAKLS*FQCCECGK	1	2082.95	4	2.2326	44.848	yes
Q17RC7	Exocyst complex component 3-like protein 4	EPNAHRKDGT*R	1	1279.64	3	0.34636	44.367	yes
Q9NVG8	TBC1 domain family member 13	EPS*IALEK	1	885.481	2	2.2838	65.246	yes
P62333	26S proteasome regulatory subunit 10B (26S proteasome AAA-ATPase subunit RPT4) (Proteasome 26S subunit ATPase 6) (Proteasome subunit p42)	EQLKELT*KQYEK	1	1535.82	2	2.0944	42.52	yes
P49736	DNA replication licensing factor MCM2 (EC 3.6.4.12) (Minichromosome maintenance protein 2 homolog) (Nuclear protein BM28)	ERIS*DMCK	1	980.442	3	2.1279	56.013	yes
Q96EF0	Myotubularin-related protein 8 (EC 3.1.3.-)	ERVPVLS*YLYK	1	1365.77	2	3.0221	50.484	yes
O75362	Zinc finger protein 217	ES*LIEHRK	1	1010.55	2	2.2343	45.081	yes
Q9Y4B5	Microtubule cross-linking factor 1 (Coiled-coil domain-containing protein 165) (PAR-1-interacting protein) (SOGA family member 2)	ET*LNGPAGGGAPDAK	1	1353.65	3	0.98219	46.318	yes
P52272	Heterogeneous nuclear ribonucleoprotein M (hnRNP M)	EVFS*MAGVVVR	1	1192.63	3	1.8984	43.594	yes
O14879	Interferon-induced protein with tetratricopeptide repeats 3 (IFIT-3) (CIG49) (ISG-60) (Interferon-induced 60 kDa protein) (IFI-60K) (Interferon-induced protein with tetratricopeptide repeats 4) (IFIT-4) (Retinoic acid-induced gene G protein) (P60) (RIG-G)	EVPDAEKQQS*HQR	1	1550.74	3	3.4582	50.354	yes
Q8IWJ2	GRIP and coiled-coil domain-containing protein 2 (185 kDa Golgi coiled-coil protein) (GCC185) (CLL-associated antigen KW-11) (CTCL tumor antigen se1-1) (Ran-binding protein 2-like 4) (RanBP2L4) (Renal carcinoma antigen NY-REN-53)	EVQS*LKEQHQK	1	1352.7	4	1.9837	58.699	yes
Q9NV06	DDB1- and CUL4-associated factor 13 (WD repeat and SOF domain-containing protein 1)	EVYHT*KRMQHVICVK	1	1869.97	3	4.9166	53.255	yes
O75937	DnaJ homolog subfamily C member 8 (Splicing protein spf31)	EWQKNFEES*R	1	1351.62	3	1.9752	59.908	yes
Q96Q83	Alpha-ketoglutarate-dependent dioxygenase alkB homolog 3 (EC 1.14.11.54) (Alkylated DNA repair protein alkB homolog 3) (hABH3) (DEPC-1) (Prostate cancer antigen 1)	EYHS*REPR	1	1072.51	3	1.993	67.704	yes
Q8WZ42	Titin (EC 2.7.11.1) (Connectin) (Rhabdomyosarcoma antigen MU-RMS-40.14)	EYT*IVVK	1	850.48	3	1.4869	51.572	yes
Q86V15	Zinc finger protein castor homolog 1 (Castor-related protein) (Putative survival-related protein) (Zinc finger protein 693)	FCGRT*HMYK	1	1141.52	2	0.37073	45.829	yes
O00267	Transcription elongation factor SPT5 (hSPT5) (DRB sensitivity-inducing factor 160 kDa subunit) (DSIF p160) (DRB sensitivity-inducing factor large subunit) (DSIF large subunit) (Tat-cotransactivator 1 protein) (Tat-CT1 protein)	FEGDT*GLIVR	1	1105.58	3	1.6997	61.419	yes
Q9Y376	Calcium-binding protein 39 (MO25alpha) (Protein Mo25)	FFS*EYEK	1	948.423	2	1.0417	42.19	yes
Q8N7Z5	Putative ankyrin repeat domain-containing protein 31	FGKS*KHK	1	830.476	3	5.3949	48.174	yes
Q96T23	Remodeling and spacing factor 1 (Rsf-1) (HBV pX-associated protein 8) (Hepatitis B virus X-associated protein) (p325 subunit of RSF chromatin-remodeling complex)	FKNIINEEDADT*MR	1	1694.79	3	4.4985	46.069	yes
O95202	Mitochondrial proton/calcium exchanger protein (Leucine zipper-EF-hand-containing transmembrane protein 1)	FLQDT*IEEMALK	1	1436.72	3	1.0472	54.09	yes
Q07666	KH domain-containing, RNA-binding, signal transduction-associated protein 1 (GAP-associated tyrosine phosphoprotein p62) (Src-associated in mitosis 68 kDa protein) (Sam68) (p21 Ras GTPase-activating protein-associated p62) (p68)	FNFVGKILGPQGNT*IK	1	1731.97	4	1.4955	49.036	yes
Q9P2P6	StAR-related lipid transfer protein 9 (START domain-containing protein 9) (StARD9)	FQLVACPQERNPS*ECK	1	1847.87	4	5.6521	45.221	yes
Q14995	Nuclear receptor subfamily 1 group D member 2 (Orphan nuclear hormone receptor BD73) (Rev-erb alpha-related receptor) (RVR) (Rev-erb-beta) (V-erbA-related protein 1-related) (EAR-1R)	FS*GMVLLCK	1	996.514	3	0.079291	52.482	yes
Q7Z6J8	E3 ubiquitin-protein ligase E3D (EC 2.3.2.26) (HECT-type E3 ubiquitin transferase E3D) (UbcH10-binding protein with a HECT-like domain) (Ubiquitin-conjugating enzyme E2C-binding protein)	FT*IQGQDDK	1	1050.5	2	4.7076	42.843	yes
Q14315	Filamin-C (FLN-C) (FLNc) (ABP-280-like protein) (ABP-L) (Actin-binding-like protein) (Filamin-2) (Gamma-filamin)	FVPQEMGPHT*VAVKYR	1	1857.96	3	1.1351	62.287	yes
Q6P1J9	Parafibromin (Cell division cycle protein 73 homolog) (Hyperparathyroidism 2 protein)	FVPS*DEKK	1	948.492	3	4.1943	52.579	yes
Q8IWA6	Coiled-coil domain-containing protein 60	FYS*VAQEAGFCLQDKMEILMKR	1	2606.27	3	1.0891	46.494	yes
Q66PJ3	ADP-ribosylation factor-like protein 6-interacting protein 4 (ARL-6-interacting protein 4) (Aip-4) (HSP-975) (HSVI-binding protein) (SR-15) (SRp25) (SR-25) (Splicing factor SRrp37)	GAMAHVGS*RKR	1	1168.62	3	0.38097	52.463	yes
Q9BY42	Protein RTF2 homolog (Replication termination factor 2 domain-containing protein 1)	GCDGGT*IPK	1	846.391	2	3.1194	49.715	yes
Q3KQU3	MAP7 domain-containing protein 1 (Arginine/proline-rich coiled-coil domain-containing protein 1) (Proline/arginine-rich coiled-coil domain-containing protein 1)	GCDPGRGPT*WGR	1	1257.57	2	4.5884	47.037	yes
Q13356	Peptidyl-prolyl cis-trans isomerase-like 2 (PPIase) (EC 2.3.2.27) (EC 5.2.1.8) (CYC4) (Cyclophilin-60) (Cyclophilin-like protein Cyp-60) (Cyp60) (hCyP-60) (RING-type E3 ubiquitin transferase isomerase-like 2) (Rotamase PPIL2)	GDEILAAT*MK	1	1047.53	2	0.21296	66.692	yes
Q9BYF1	Angiotensin-converting enzyme 2 (EC 3.4.17.23) (ACE-related carboxypeptidase) (Angiotensin-converting enzyme homolog) (ACEH) (Metalloprotease MPROT15) [Cleaved into: Processed angiotensin-converting enzyme 2]	GDFRILMCT*K	1	1182.59	3	4.9577	58.699	yes
Q96KS9	Protein FAM167A	GDINKLKIEHT*CR	1	1525.8	2	2.7867	55.261	yes
P11532	Dystrophin	GDNLQQRIT*DERK	1	1571.8	4	5.355	43.68	yes
Q96H79	Zinc finger CCCH-type antiviral protein 1-like	GECKLQT*CK	1	1008.47	2	2.6928	50.95	yes
Q15643	Thyroid receptor-interacting protein 11 (TR-interacting protein 11) (TRIP-11) (Clonal evolution-related gene on chromosome 14 protein) (Golgi-associated microtubule-binding protein 210) (GMAP-210) (Trip230)	GENEKIVET*YR	1	1336.66	3	0.83063	60.691	yes
Q8N184	Zinc finger protein 567	GENPS*VYNKK	1	1134.57	2	0.41088	61.161	yes
Q9UL59	Zinc finger protein 214 (BWSCR2-associated zinc finger protein 1) (BAZ-1)	GFDHNS*HLHNNHRR	1	1739.81	3	1.8226	57.973	yes
Q9HCI6	E3 SUMO-protein ligase KIAA1586 (EC 2.3.2.-) (E3 SUMO-protein transferase KIAA1586)	GFNLMNIICT*R	1	1280.64	2	4.9114	45.908	yes
O00746	Nucleoside diphosphate kinase, mitochondrial (NDK) (NDP kinase, mitochondrial) (EC 2.7.4.6) (Nucleoside diphosphate kinase D) (NDPKD) (nm23-H4)	GFT*LVGMK	1	851.458	2	1.2742	65.252	yes
Q9H936	Mitochondrial glutamate carrier 1 (GC-1) (Glutamate/H(+) symporter 1) (Solute carrier family 25 member 22)	GIAGLYKGLGAT*LLR	1	1501.9	3	1.9697	43.761	yes
P13984	General transcription factor IIF subunit 2 (EC 3.6.4.12) (ATP-dependent helicase GTF2F2) (General transcription factor IIF 30 kDa subunit) (Transcription initiation factor IIF subunit beta) (TFIIF-beta) (Transcription initiation factor RAP30)	GIHKNT*WELKPEYR	1	1769.92	4	2.1238	63.864	yes
Q9BTP7	Fanconi anemia core complex-associated protein 24 (Fanconi anemia-associated protein of 24 kDa)	GIVVVEKT*R	1	999.608	2	1.4625	71.501	yes
Q86WX3	Active regulator of SIRT1 (40S ribosomal protein S19-binding protein 1) (RPS19-binding protein 1) (S19BP)	GKVPKS*ALDEYR	1	1361.73	2	3.235	51.612	yes
Q8NFW5	Diencephalon/mesencephalon homeobox protein 1 (Orthodenticle homolog 3) (Paired-like homeobox protein DMBX1)	GLGCKRGS*PK	1	1001.54	2	2.5046	50.108	yes
Q8N3A8	Poly [ADP-ribose] polymerase 8 (PARP-8) (EC 2.4.2.30) (ADP-ribosyltransferase diphtheria toxin-like 16) (ARTD16)	GMCS*RQERIQK	1	1334.65	3	5.9099	56.404	yes
Q15043	Zinc transporter ZIP14 (LIV-1 subfamily of ZIP zinc transporter 4) (LZT-Hs4) (Solute carrier family 39 member 14) (Zrt- and Irt-like protein 14) (ZIP-14)	GNVT*QHVQGHR	1	1231.62	4	0.01748	60.364	yes
Q9UM54	Unconventional myosin-VI (Unconventional myosin-6)	GPAVLAT*K	1	755.454	2	4.957	77.058	yes
P32314	Forkhead box protein N2 (Human T-cell leukemia virus enhancer factor)	GPVIGMT*PDKR	1	1169.62	3	1.7369	47.187	yes
O60260	E3 ubiquitin-protein ligase parkin (Parkin) (EC 2.3.2.27) (Parkin RBR E3 ubiquitin-protein ligase) (Parkinson juvenile disease protein 2) (Parkinson disease protein 2)	GQEMNAT*GGDDPR	1	1346.55	2	2.7836	44.312	yes
Q9NRL3	Striatin-4 (Zinedin)	GQENLKT*DLVRR	1	1427.78	4	1.5821	60.255	yes
Q8TDG4	Helicase POLQ-like (EC 3.6.4.12) (Mus308-like helicase) (POLQ-like helicase)	GRFPPT*K	1	801.45	2	5.4796	49.418	yes
O14746	Telomerase reverse transcriptase (EC 2.7.7.49) (HEST2) (Telomerase catalytic subunit) (Telomerase-associated protein 2) (TP2)	GS*GAWGLLLR	1	1028.58	2	1.3388	61.233	yes
O15357	Phosphatidylinositol 3,4,5-trisphosphate 5-phosphatase 2 (EC 3.1.3.86) (Inositol polyphosphate phosphatase-like protein 1) (INPPL-1) (Protein 51C) (SH2 domain-containing inositol 5'-phosphatase 2) (SH2 domain-containing inositol phosphatase 2) (SHIP-2)	GS*YGLDLEAVR	1	1178.59	2	2.4753	51.463	yes
P55916	Mitochondrial uncoupling protein 3 (UCP 3) (Solute carrier family 25 member 9)	GT*LPNIMR	1	900.485	2	3.6983	40.778	yes
Q96GD3	Polycomb protein SCMH1 (Sex comb on midleg homolog 1)	GVLKGS*NER	1	958.52	2	3.8107	62.166	yes
Q5VU43	Myomegalin (Cardiomyopathy-associated protein 2) (Phosphodiesterase 4D-interacting protein)	HAKDT*VK	1	797.44	2	2.7188	69.432	yes
Q92784	Zinc finger protein DPF3 (BRG1-associated factor 45C) (BAF45C) (Zinc finger protein cer-d4)	HDAAS*QEDHDKPYVCDICGKR	1	2386.04	3	1.6271	55.128	yes
Q5VT97	Rho GTPase-activating protein SYDE2 (Synapse defective protein 1 homolog 2) (Protein syd-1 homolog 2)	HDLPPDS*GARRGGR	1	1489.75	4	3.6142	53.981	yes
O95639	Cleavage and polyadenylation specificity factor subunit 4 (Cleavage and polyadenylation specificity factor 30 kDa subunit) (CPSF 30 kDa subunit) (NS1 effector domain-binding protein 1) (Neb-1) (No arches homolog)	HGPLCRHRHT*R	1	1368.71	3	5.2353	59.067	yes
Q9UKT9	Zinc finger protein Aiolos (Ikaros family zinc finger protein 3)	HIKAEMGS*ER	1	1156.57	3	5.4805	60.398	yes
Q96LW1	Zinc finger protein 354B	HQKNHT*GEKLFK	1	1465.78	3	5.0578	48.527	yes
Q6ZN11	Zinc finger protein 793	HQRIHT*GVRPFECFFCGK	1	2161.05	4	0.30468	50.957	yes
Q9Y6H3	Mitochondrial inner membrane protease ATP23 homolog (EC 3.4.24.-) (Ku70-binding protein 3) (XRCC6-binding protein 1)	HS*GCAVNKDR	1	1085.5	3	3.1736	58.699	yes
Q92576	PHD finger protein 3	HT*IEMIEKEQR	1	1412.71	3	0.72226	51.135	yes
Q6NZI2	Caveolae-associated protein 1 (Cavin-1) (Polymerase I and transcript release factor)	HT*LEKRMNK	1	1155.62	2	1.6232	53.089	yes
Q96IJ6	Mannose-1-phosphate guanyltransferase alpha (GDP-mannose pyrophosphorylase A) (GMPP-alpha) (GTP-mannose-1-phosphate guanylyltransferase alpha)	HT*PGGPWIR	1	1019.53	2	2.6755	60.019	yes
Q494V2	Cilia- and flagella-associated protein 100 (Coiled-coil domain-containing protein 37)	HT*QIRMDR	1	1055.53	3	1.5132	45.368	yes
Q0VG06	Fanconi anemia core complex-associated protein 100 (Fanconi anemia-associated protein of 100 kDa)	HT*VDMLQCLR	1	1214.59	2	2.9561	45.158	yes
Q5VWJ9	Sorting nexin-30	HVT*GGYKLR	1	1029.57	2	5.6519	63.624	yes
Q14320	Protein FAM50A (Protein HXC-26) (Protein XAP-5)	IAEENIMKS*NIDK	1	1503.76	3	0.1274	56.205	yes
Q6N043	Zinc finger protein 280D (Suppressor of hairy wing homolog 4) (Zinc finger protein 634)	IAT*PYMHHYMKHQK	1	1783.87	3	3.9031	47.712	yes
Q5TAX3	Terminal uridylyltransferase 4 (TUTase 4) (EC 2.7.7.52) (Zinc finger CCHC domain-containing protein 11)	IDLKPLPPMT*NR	1	1393.78	3	2.5371	44.132	yes
Q09666	Neuroblast differentiation-associated protein AHNAK (Desmoyokin)	IHMS*GPK	1	768.395	2	5.1895	41.427	yes
Q5FWF6	Zinc finger protein 789	IHT*KEEFFQCGECGK	1	1754.78	4	2.2033	53.255	yes
Q99742	Neuronal PAS domain-containing protein 1 (Neuronal PAS1) (Basic-helix-loop-helix-PAS protein MOP5) (Class E basic helix-loop-helix protein 11) (bHLHe11) (Member of PAS protein 5) (PAS domain-containing protein 5)	IKVEPGPRET*K	1	1252.71	2	3.9174	44.639	yes
P78527	DNA-dependent protein kinase catalytic subunit (DNA-PK catalytic subunit) (DNA-PKcs) (EC 2.7.11.1) (DNPK1) (p460)	ILDVMYS*R	1	995.511	2	1.737	52.579	yes
A6NK44	Glyoxalase domain-containing protein 5	ILGMEVMT*FK	1	1167.6	3	1.4897	69.812	yes
Q8WVY7	Ubiquitin-like domain-containing CTD phosphatase 1 (EC 3.1.3.16) (Nuclear proteasome inhibitor UBLCP1)	IMMMGT*R	1	838.386	2	1.8736	47.657	yes
Q8NEZ3	WD repeat-containing protein 19 (Intraflagellar transport 144 homolog)	IPVLGKHT*K	1	991.618	2	0.3937	57.047	yes
Q4G0P3	Hydrocephalus-inducing protein homolog	IRCKLS*R	1	874.517	2	0.50677	75.213	yes
Q5TDH0	Protein DDI1 homolog 2 (EC 3.4.23.-)	IRLFS*ADPFDLEAQAK	1	1819.95	2	5.385	47.037	yes
Q8TBZ0	Coiled-coil domain-containing protein 110 (Cancer/testis antigen 52) (CT52) (Cancer/testis antigen KM-HN-1)	IS*ELEALVK	1	1000.58	3	2.501	60.828	yes
Q8N9B5	Junction-mediating and -regulatory protein	IS*MENDYLGPR	1	1293.6	3	0.29788	55.806	yes
Q9UF12	Hydroxyproline dehydrogenase (HYPDH) (EC 1.5.5.3) (Kidney and liver proline oxidase 1) (HsPOX1) (Probable proline dehydrogenase 2) (EC 1.5.5.2) (Probable proline oxidase 2)	IT*APGLGK	1	755.454	2	1.495	76.478	yes
Q6ZMZ3	Nesprin-3 (KASH domain-containing protein 3) (KASH3) (Nuclear envelope spectrin repeat protein 3)	IT*GELEEMRK	1	1204.61	2	0.95767	55.064	yes
Q5TYW1	Zinc finger protein 658	IT*LFNHMR	1	1030.54	2;3	1.2996	54.157	yes
P62701	40S ribosomal protein S4, X isoform (SCR10) (Single copy abundant mRNA protein) (Small ribosomal subunit protein eS4)	IT*PEEAKYKLCK	1	1421.76	2	3.1104	45.347	yes
C9JBD0	KRAB domain-containing protein 1	IVS*KIFRNR	1	1131.69	3	5.4648	63.565	yes
Q8WXJ9	Ankyrin repeat and SOCS box protein 17 (ASB-17)	IYRS*LAKILR	1	1231.78	3	3.8169	51.276	yes
P30876	DNA-directed RNA polymerase II subunit RPB2 (EC 2.7.7.6) (DNA-directed RNA polymerase II 140 kDa polypeptide) (DNA-directed RNA polymerase II subunit B) (RNA polymerase II subunit 2) (RNA polymerase II subunit B2)	IYT*DAGR	1	794.392	2	2.1065	50.632	yes
P31948	Stress-induced-phosphoprotein 1 (STI1) (Hsc70/Hsp90-organizing protein) (Hop) (Renal carcinoma antigen NY-REN-11) (Transformation-sensitive protein IEF SSP 3521)	KAAALEAMKDYT*K	1	1438.75	3	2.9902	50.088	yes
Q5T7W7	Thiosulfate sulfurtransferase/rhodanese-like domain-containing protein 2 (Rhodanese domain-containing protein 2)	KAFALFVKT*K	1	1151.71	3	3.1315	45.022	yes
Q9Y4E6	WD repeat-containing protein 7 (Rabconnectin-3 beta) (TGF-beta resistance-associated protein TRAG)	KCIMLAS*R	1	920.494	2	1.353	57.174	yes
Q8TEW0	Partitioning defective 3 homolog (PAR-3) (PARD-3) (Atypical PKC isotype-specific-interacting protein) (ASIP) (CTCL tumor antigen se2-5) (PAR3-alpha)	KDENYRS*LPR	1	1276.65	3	0.55729	80.245	yes
Q9UFE4	Coiled-coil domain-containing protein 39	KDIHEET*AR	1	1097.55	3	3.5644	42.19	yes
Q9H477	Ribokinase (RK) (EC 2.7.1.15)	KDLPLT*LF	1	945.554	2	4.6011	54.776	yes
Q96F45	Zinc finger protein 503	KDT*DVGGGGK	1	932.456	3	2.0306	65.224	yes
Q86UY8	5'-nucleotidase domain-containing protein 3 (EC 3.1.3.-) (GRP94-neighboring nucleotidase)	KEMREMT*K	1	1051.52	2	0.50618	60.828	yes
Q2KJ03	Deleted.	KFLAMPPFLRS*QIGK	1	1731.99	4	0.9846	46.892	yes
Q9BZ01	Deleted.	KFQS*FQDHK	1	1163.57	2	5.0274	46.462	yes
A8MWD9	Putative small nuclear ribonucleoprotein G-like protein 15	KFS*LKLNGGR	1	1118.66	2	0.011422	61.56	yes
Q9H9C1	Spermatogenesis-defective protein 39 homolog (hSPE-39) (VPS33B-interacting protein in apical-basolateral polarity regulator) (VPS33B-interacting protein in polarity and apical restriction)	KGKVCS*LER	1	1018.56	2	2.7739	56.258	yes
P16157	Ankyrin-1 (ANK-1) (Ankyrin-R) (Erythrocyte ankyrin)	KGNT*ALHIAALAGQDEVVR	1	1962.06	3	4.5735	45.577	yes
O15397	Importin-8 (Imp8) (Ran-binding protein 8) (RanBP8)	KIEQQGGFT*FENK	1	1524.76	3	3.4391	42.976	yes
Q9P2J3	Kelch-like protein 9	KIIDFIYT*AK	1	1210.7	3	3.5613	51.436	yes
Q6P2D8	X-ray radiation resistance-associated protein 1	KIVKPKHHVLMS*R	1	1571.94	3	3.4116	57.175	yes
Q8NHV4	Protein NEDD1 (Neural precursor cell expressed developmentally down-regulated protein 1) (NEDD-1)	KIYMGKQES*K	1	1210.64	3	4.6271	53.751	yes
Q969P5	F-box only protein 32 (Atrogin-1) (Muscle atrophy F-box protein) (MAFbx)	KKDMLNS*K	1	962.522	2	2.2085	57.281	yes
Q8NFP0	Peroxisomal testis-specific protein 1 (Small testis-specific peroxisomal protein)	KKHDGIVYET*K	1	1316.71	3	2.1579	49.483	yes
Q4V328	GRIP1-associated protein 1 (GRASP-1) [Cleaved into: GRASP-1 C-terminal chain (30kDa C-terminus form)]	KKQES*FCR	1	1024.51	2	1.9258	62.107	yes
Q9ULG1	DNA helicase INO80 (hINO80) (EC 3.6.4.12) (INO80 complex subunit A) (Putative DNA helicase INO80 complex homolog 1)	KLHQNKYS*K	1	1144.64	2	5.6117	70.028	yes
Q5TKA1	Protein lin-9 homolog (HuLin-9) (hLin-9) (Beta subunit-associated regulator of apoptosis) (TUDOR gene similar protein) (Type I interferon receptor beta chain-associated protein) (pRB-associated protein)	KLREMNT*EAEK	1	1347.68	3	2.3885	50.108	yes
Q9H2A2	Aldehyde dehydrogenase family 8 member A1 (EC 1.2.1.-) (Aldehyde dehydrogenase 12)	KLS*LELGGK	1	943.57	2	3.8064	50.04	yes
O75182	Paired amphipathic helix protein Sin3b (Histone deacetylase complex subunit Sin3b) (Transcriptional corepressor Sin3b)	KLS*RMAPEDQEK	1	1430.72	2	1.6744	43.861	yes
P13929	Beta-enolase (EC 4.2.1.11) (2-phospho-D-glycerate hydro-lyase) (Enolase 3) (Muscle-specific enolase) (MSE) (Skeletal muscle enolase)	KLS*VVDQEK	1	1044.58	3	0.2629	66.299	yes
Q6BDS2	UHRF1-binding protein 1 (ICBP90-binding protein 1) (Ubiquitin-like containing PHD and RING finger domains 1-binding protein 1)	KMAFDYYPFHWAGDS*CKHWVR	1	2643.19	4	1.6645	40.614	yes
Q8N140	EP300-interacting inhibitor of differentiation 3 (EID-3) (E1A-like inhibitor of differentiation 3) (EID-1-like inhibitor of differentiation 3) (Non-structural maintenance of chromosomes element 4 homolog B) (NS4EB) (Non-SMC element 4 homolog B)	KMEENGNMPT*K	1	1277.57	3	3.355	57.53	yes
Q6ZP82	Coiled-coil domain-containing protein 141 (Coiled-coil protein associated with myosin II and DISC1)	KMEKVS*NK	1	962.522	2	3.8221	60.398	yes
Q1L5Z9	LON peptidase N-terminal domain and RING finger protein 2 (Neuroblastoma apoptosis-related protease) (RING finger protein 192)	KMNS*RQELANAR	1	1416.73	3	4.5191	40.941	yes
P15924	Desmoplakin (DP) (250/210 kDa paraneoplastic pemphigus antigen)	KMS*AAEAVK	1	933.495	2	2.7655	60.691	yes
Q5T5S1	Coiled-coil domain-containing protein 183	KMT*DMLKEEEER	1	1537.71	3	5.5273	50.354	yes
P0C2W1	F-box/SPRY domain-containing protein 1 (F-box only protein 45) (hFbxo45)	KNGFT*LHR	1	971.53	2	3.5935	49.097	yes
Q9P2D1	Chromodomain-helicase-DNA-binding protein 7 (CHD-7) (EC 3.6.4.12) (ATP-dependent helicase CHD7)	KNNHIVAEDPS*KGFGK	1	1739.9	3	5.8978	48.907	yes
Q9UBW7	Zinc finger MYM-type protein 2 (Fused in myeloproliferative disorders protein) (Rearranged in atypical myeloproliferative disorder protein) (Zinc finger protein 198)	KNPLT*MENKACLR	1	1516.79	2	3.2349	48.115	yes
O94851	[F-actin]-monooxygenase MICAL2 (EC 1.14.13.225) (Molecule interacting with CasL protein 2) (MICAL-2)	KNYGENADLS*LAK	1	1421.72	3	5.9974	47.606	yes
Q5T5X7	BEN domain-containing protein 3	KPLYGIS*HKIMEK	1	1542.86	3	2.8226	40.187	yes
Q14938	Nuclear factor 1 X-type (NF1-X) (Nuclear factor 1/X) (CCAAT-box-binding transcription factor) (CTF) (Nuclear factor I/X) (NF-I/X) (NFI-X) (TGGCA-binding protein)	KPPCCVLS*NPDQKGK	1	1612.81	3	2.7368	44.998	yes
O14497	AT-rich interactive domain-containing protein 1A (ARID domain-containing protein 1A) (B120) (BRG1-associated factor 250) (BAF250) (BRG1-associated factor 250a) (BAF250A) (Osa homolog 1) (hOSA1) (SWI-like protein) (SWI/SNF complex protein p270) (SWI/SNF-related, matrix-associated, actin-dependent regulator of chromatin subfamily F member 1) (hELD)	KQAPLT*YEK	1	1076.59	3	0.26584	53.775	yes
Q8N5C6	S1 RNA-binding domain-containing protein 1	KQPPPKES*KPK	1	1262.73	3	4.763	47.894	yes
A6NHR9	Structural maintenance of chromosomes flexible hinge domain-containing protein 1 (SMC hinge domain-containing protein 1)	KQQQMAALT*KEK	1	1402.76	3	4.6931	58.626	yes
Q8N7C4	Transmembrane protein 217	KQQQWCGMT*AK	1	1307.61	3	5.1195	41.399	yes
Q8N4L4	Spermatid maturation protein 1	KQT*QPPK	1	825.471	2	2.5286	55.531	yes
Q8NHY6	Zinc finger protein 28 homolog (Zfp-28) (Krueppel-like zinc finger factor X6)	KT*FIQIGHLNQHK	1	1562.87	3	4.1242	49.934	yes
Q96S94	Cyclin-L2 (Paneth cell-enhanced expression protein)	KVDLT*HLEGEVEK	1	1495.79	3	2.4382	58.04	yes
Q8IXT5	RNA-binding protein 12B (RNA-binding motif protein 12B)	KVKLT*LL	1	813.569	2	5.1231	53.554	yes
Q9H6Q4	Cytosolic Fe-S cluster assembly factor NARFL (Iron-only hydrogenase-like protein 1) (IOP1) (Nuclear prelamin A recognition factor-like protein) (Protein related to Narf)	KVLDANKMAAPS*QQR	1	1655.88	2	0.24999	51.726	yes
Q5VWX1	KH domain-containing, RNA-binding, signal transduction-associated protein 2 (Sam68-like mammalian protein 1) (SLM-1) (hSLM-1)	KYLDVIS*NKNIK	1	1433.82	2	0.39868	49.632	yes
P55010	Eukaryotic translation initiation factor 5 (eIF-5)	KYVS*KELAK	1	1064.62	3	3.1827	61.344	yes
E5RQL4	Formiminotransferase N-terminal subdomain-containing protein (Formiminotransferase-cyclodeaminase N-terminal-like protein)	LAACLLNVS*EAGRK	1	1443.79	3	2.9943	41.218	yes
Q3MII6	TBC1 domain family member 25	LAANFHPDGRAMAT*K	1	1598.8	3	1.7111	52.101	yes
Q9UL16	Cilia- and flagella-associated protein 45 (Coiled-coil domain-containing protein 19) (Nasopharyngeal epithelium-specific protein 1)	LADQMVMEFT*K	1	1311.62	2	1.8385	47.844	yes
P20700	Lamin-B1	LALDMEIS*AYR	1	1280.64	3	0.92664	43.297	yes
O95822	Malonyl-CoA decarboxylase, mitochondrial (MCD) (EC 4.1.1.9)	LAS*GQAAGALER	1	1142.6	2	0.46298	57.164	yes
Q8NEN9	PDZ domain-containing protein 8 (Sarcoma antigen NY-SAR-84/NY-SAR-104)	LAVGS*HPLPPK	1	1114.65	2	1.2943	77.533	yes
Q5JRC9	Protein FAM47A	LDS*ERKLEDAR	1	1330.68	3	1.2593	56.548	yes
P78417	Glutathione S-transferase omega-1 (GSTO-1) (EC 2.5.1.18) (Glutathione S-transferase omega 1-1) (GSTO 1-1) (Glutathione-dependent dehydroascorbate reductase) (EC 1.8.5.1) (Monomethylarsonic acid reductase) (MMA(V) reductase) (EC 1.20.4.2) (S-(Phenacyl)glutathione reductase) (SPG-R)	LEAMKLNECVDHT*PK	1	1726.84	3	4.2787	43.305	yes
Q15080	Neutrophil cytosol factor 4 (NCF-4) (Neutrophil NADPH oxidase factor 4) (SH3 and PX domain-containing protein 4) (p40-phox) (p40phox)	LEERFGPDS*K	1	1176.58	2	0.49856	67.113	yes
Q9UL18	Protein argonaute-1 (Argonaute1) (hAgo1) (Argonaute RISC catalytic component 1) (Eukaryotic translation initiation factor 2C 1) (eIF-2C 1) (eIF2C 1) (Putative RNA-binding protein Q99)	LEKDYQPGIT*YIVVQK	1	1893.02	4	1.1677	44.831	yes
Q8NI35	InaD-like protein (Inadl protein) (hINADL) (Pals1-associated tight junction protein) (Protein associated to tight junctions)	LEKVPDS*PENELK	1	1496.77	4	4.2474	42.314	yes
P78347	General transcription factor II-I (GTFII-I) (TFII-I) (Bruton tyrosine kinase-associated protein 135) (BAP-135) (BTK-associated protein 135) (SRF-Phox1-interacting protein) (SPIN) (Williams-Beuren syndrome chromosomal region 6 protein)	LERIVRGS*NK	1	1170.68	2	5.0777	67.08	yes
Q9UJ98	Cohesin subunit SA-3 (SCC3 homolog 3) (Stromal antigen 3) (Stromalin-3)	LFHQDKQLLLS*YLEK	1	1874.03	4	2.8036	41.621	yes
O60765	Zinc finger protein 354A (Transcription factor 17) (TCF-17) (Zinc finger protein eZNF)	LFKCKECS*K	1	1084.54	3	2.9082	54.982	yes
Q8IWJ2	GRIP and coiled-coil domain-containing protein 2 (185 kDa Golgi coiled-coil protein) (GCC185) (CLL-associated antigen KW-11) (CTCL tumor antigen se1-1) (Ran-binding protein 2-like 4) (RanBP2L4) (Renal carcinoma antigen NY-REN-53)	LFVKT*QLYGFLK	1	1455.85	3	0.43567	50.108	yes
Q13670	Putative postmeiotic segregation increased 2-like protein 11 (PMS2-related protein 6) (Putative postmeiotic segregation increased 2 pseudogene 11)	LGLDWCLIT*MGK	1	1348.69	3	2.3904	53.211	yes
A6NC57	Ankyrin repeat domain-containing protein 62	LGQMRS*QVCMK	1	1279.62	3	4.8433	41.383	yes
Q9UNF1	Melanoma-associated antigen D2 (11B6) (Breast cancer-associated gene 1 protein) (BCG-1) (Hepatocellular carcinoma-associated protein JCL-1) (MAGE-D2 antigen)	LIT*DEFVKQK	1	1219.68	3	2.7252	51.528	yes
Q9UFE4	Coiled-coil domain-containing protein 39	LKDERAS*LQDELR	1	1571.83	2	2.0522	69.045	yes
Q96PY5	Formin-like protein 2 (Formin homology 2 domain-containing protein 2)	LKGYLDPAVT*R	1	1231.69	3	3.4398	50.786	yes
Q9Y5X3	Sorting nexin-5	LKS*KDVK	1	816.507	2	1.2968	53.775	yes
Q8IUH3	RNA-binding protein 45 (Developmentally-regulated RNA-binding protein 1) (RB-1) (RNA-binding motif protein 45)	LKVMLADS*PR	1	1128.63	3	1.5155	51.445	yes
Q9BY71	Leucine-rich repeat-containing protein 3	LLDLS*YNRIQRIPK	1	1728	2	5.2954	41.695	yes
Q9UM07	Protein-arginine deiminase type-4 (EC 3.5.3.15) (HL-60 PAD) (Peptidylarginine deiminase IV) (Protein-arginine deiminase type IV)	LLLAS*PR	1	768.486	3	0.086676	76.1	yes
A6NC98	Coiled-coil domain-containing protein 88B (Brain leucine zipper domain-containing protein) (Gipie) (Hook-related protein 3) (HkRP3)	LLLGAS*VQCEHRELFIR	1	1983.07	4	4.3601	44.132	yes
Q8IVF6	Ankyrin repeat domain-containing protein 18A	LLS*HHANIEALNK	1	1458.79	4	0.81412	51.727	yes
Q12874	Splicing factor 3A subunit 3 (SF3a60) (Spliceosome-associated protein 61) (SAP 61)	LMDVMAKEMLT*KK	1	1536.81	3	4.8877	49.632	yes
P33993	DNA replication licensing factor MCM7 (EC 3.6.4.12) (CDC47 homolog) (P1.1-MCM3)	LMMEQRS*RDPGMVR	1	1704.82	2	4.5147	48.277	yes
Q6P4R8	Nuclear factor related to kappa-B-binding protein (DNA-binding protein R kappa-B) (INO80 complex subunit G)	LMPALGVS*VADQK	1	1327.72	3	0.088412	50.305	yes
Q69YQ0	Cytospin-A (Renal carcinoma antigen NY-REN-22) (Sperm antigen with calponin homology and coiled-coil domains 1-like) (SPECC1-like protein)	LNALGFS*LEQR	1	1246.67	3	0.77257	52.495	yes
Q08999	Retinoblastoma-like protein 2 (130 kDa retinoblastoma-associated protein) (p130) (Retinoblastoma-related protein 2) (RBR-2) (pRb2)	LNMDEAARAEAWDS*YR	1	1896.84	3	1.1738	49.188	yes
P23786	Carnitine O-palmitoyltransferase 2, mitochondrial (EC 2.3.1.21) (Carnitine palmitoyltransferase II) (CPT II)	LPIPKLEDT*IR	1	1293.77	2	0.75985	77.288	yes
O43889	Cyclic AMP-responsive element-binding protein 3 (CREB-3) (cAMP-responsive element-binding protein 3) (Leucine zipper protein) (Luman) (Transcription factor LZIP-alpha) [Cleaved into: Processed cyclic AMP-responsive element-binding protein 3 (N-terminal Luman) (Transcriptionally active form)]	LQAMVIEIS*NK	1	1244.68	2	0.8098	43.419	yes
O75541	Zinc finger protein 821	LQRMQET*DEQR	1	1432.67	3	5.1841	53.124	yes
Q86U28	Iron-sulfur cluster assembly 2 homolog, mitochondrial (HESB-like domain-containing protein 1)	LQVEGGGCS*GFQYK	1	1471.68	2	4.0249	52.576	yes
P31629	Transcription factor HIVEP2 (Human immunodeficiency virus type I enhancer-binding protein 2) (HIV-EP2) (MHC-binding protein 2) (MBP-2)	LS*ALPKQDEFGK	1	1331.71	3	0.35457	50.354	yes
O94913	Pre-mRNA cleavage complex 2 protein Pcf11 (Pre-mRNA cleavage complex II protein Pcf11)	LS*DMNKR	1	862.433	2	4.74	47.849	yes
P11142	Heat shock cognate 71 kDa protein (Heat shock 70 kDa protein 8) (Lipopolysaccharide-associated protein 1) (LAP-1) (LPS-associated protein 1)	LS*KEDIERMVQEAEK	1	1803.9	2	5.0202	55.196	yes
Q8N4X5	Actin filament-associated protein 1-like 2 (AFAP1-like protein 2)	LS*NLMNLGR	1	1016.54	3	1.7452	67.897	yes
Q9Y4F9	Rho family-interacting cell polarization regulator 2	LT*AQLKDMKR	1	1202.68	3	0.68473	49.3	yes
Q13480	GRB2-associated-binding protein 1 (GRB2-associated binder 1) (Growth factor receptor bound protein 2-associated protein 1)	LT*GDPDVLEYYKNDHAK	1	1976.95	3	1.1638	41.088	yes
P04406	Glyceraldehyde-3-phosphate dehydrogenase (GAPDH) (EC 1.2.1.12) (Peptidyl-cysteine S-nitrosylase GAPDH) (EC 2.6.99.-)	LT*GMAFR	1	794.411	2	0.4819	44.692	yes
Q4KMZ1	IQ domain-containing protein C	LT*KGPDDGR	1	957.488	2	0.068168	55.064	yes
O95613	Pericentrin (Kendrin) (Pericentrin-B)	LT*LMLLELREK	1	1357.8	2	3.0299	43.798	yes
Q14590	Zinc finger protein 235 (Zinc finger protein 270) (Zinc finger protein 93 homolog) (Zfp-93) (Zinc finger protein HZF6)	LWMKELQT*QRGK	1	1516.82	2	4.3144	58.132	yes
P57740	Nuclear pore complex protein Nup107 (107 kDa nucleoporin) (Nucleoporin Nup107)	LYLVFS*KEELRK	1	1523.87	2	2.8231	54.198	yes
P20929	Nebulin	LYT*EAWDNDKK	1	1381.65	2	5.2336	44.639	yes
Q12765	Secernin-1	MAAAPPS*YCFVAFPPR	1	1723.82	2	0.88462	44.391	yes
O75643	U5 small nuclear ribonucleoprotein 200 kDa helicase (EC 3.6.4.13) (Activating signal cointegrator 1 complex subunit 3-like 1) (BRR2 homolog) (U5 snRNP-specific 200 kDa protein) (U5-200KD)	MADVT*AR	1	762.369	2	2.6218	43.124	yes
Q5VVC0	Uncharacterized protein C1orf146	MAES*GKEK	1	878.417	2	5.669	73.26	yes
Q8WV92	MIT domain-containing protein 1	MAKS*GLR	1	761.422	2	5.9657	50.966	yes
Q8ND82	Zinc finger protein 280C (Suppressor of hairy wing homolog 3) (Zinc finger protein 633)	MAT*PYMNHYMKHQK	1	1778.81	4	1.6521	47.429	yes
Q8N9Q2	Protein SREK1IP1 (SFRS12-interacting protein 1) (SREK1-interacting protein 1) (Splicing regulatory protein of 18 kDa) (p18SRP)	MAVPGCNKDS*VR	1	1275.61	3	2.3273	60.598	yes
Q6ZUU3	FOXL2 neighbor protein	MCLHMAVRHS*K	1	1311.64	3	1.8435	43.308	yes
Q9NTU4	Cation channel sperm-associated protein subunit zeta (CatSper-zeta) (CatSperzeta) (Testis-expressed protein 40)	MEEKPS*K	1	847.411	3	1.3121	47.96	yes
P46939	Utrophin (Dystrophin-related protein 1) (DRP-1)	MET*CPLDDDVK	1	1264.53	3	0.66033	55.314	yes
Q9HBT8	Zinc finger protein 286A	MET*DLAEMPEK	1	1292.56	2	0.048746	57.532	yes
Q8WZ42	Titin (EC 2.7.11.1) (Connectin) (Rhabdomyosarcoma antigen MU-RMS-40.14)	MEVT*GLEEGK	1	1091.52	2	3.8374	53.756	yes
O75394	39S ribosomal protein L33, mitochondrial (L33mt) (MRP-L33) (Mitochondrial large ribosomal subunit protein bL33m)	MFLS*AVFFAK	1	1159.61	2	2.983	56.258	yes
Q96T68	Histone-lysine N-methyltransferase SETDB2 (EC 2.1.1.43) (Chronic lymphocytic leukemia deletion region gene 8 protein) (Lysine N-methyltransferase 1F) (SET domain bifurcated 2)	MGEKNGDAKT*FWMELEDDGK	1	2300.01	4	3.7008	47.082	yes
Q9Y4K1	Beta/gamma crystallin domain-containing protein 1 (Absent in melanoma 1 protein)	MGGRKVEFPT*DPK	1	1460.74	3	0.54812	42.425	yes
Q9H5L9	Putative uncharacterized protein C5orf66	MGIT*PWPK	1	928.484	2	3.1042	46.462	yes
Q96L73	Histone-lysine N-methyltransferase, H3 lysine-36 and H4 lysine-20 specific (EC 2.1.1.43) (Androgen receptor coactivator 267 kDa protein) (Androgen receptor-associated protein of 267 kDa) (H3-K36-HMTase) (H4-K20-HMTase) (Lysine N-methyltransferase 3B) (Nuclear receptor-binding SET domain-containing protein 1) (NR-binding SET domain-containing protein)	MGKGVDGT*YK	1	1054.51	2	0.95537	57.785	yes
Q9NWV8	BRISC and BRCA1-A complex member 1 (Mediator of RAP80 interactions and targeting subunit of 40 kDa) (New component of the BRCA1-A complex)	MIEMFVRT*K	1	1153.6	3	5.1918	53.968	yes
Q9H2F5	Enhancer of polycomb homolog 1	MKDDVVLGIGVNGVLPAS*GVYK	1	2230.2	3	0.1738	41.988	yes
Q1KMD3	Heterogeneous nuclear ribonucleoprotein U-like protein 2 (Scaffold-attachment factor A2) (SAF-A2)	MKGLEEPEMDPKS*R	1	1645.78	2	4.1445	44.426	yes
Q9UI08	Ena/VASP-like protein (Ena/vasodilator-stimulated phosphoprotein-like)	MKPAGS*VNDMALDAFDLDR	1	2064.96	4	1.605	52.862	yes
Q9H6R3	Acyl-CoA synthetase short-chain family member 3, mitochondrial (EC 6.2.1.1) (Acyl-CoA synthetase short-chain family member 3)	MKPS*WLQCRK	1	1275.66	3	0.3517	44.614	yes
Q96LM1	Putative uncharacterized protein encoded by LINC00615	MKQKQEVMFQS*R	1	1538.77	3	0.72356	52.79	yes
Q9NVM9	Integrator complex subunit 13 (Cell cycle regulator Mat89Bb homolog) (Germ cell tumor 1) (Protein asunder homolog) (Sarcoma antigen NY-SAR-95)	MLEDCVQET*IHEHNK	1	1824.81	2	4.8953	47.916	yes
P28065	Proteasome subunit beta type-9 (EC 3.4.25.1) (Low molecular mass protein 2) (Macropain chain 7) (Multicatalytic endopeptidase complex chain 7) (Proteasome chain 7) (Proteasome subunit beta-1i) (Really interesting new gene 12 protein)	MLRAGAPT*GDLPR	1	1353.72	4	1.9213	62.68	yes
Q8NEN0	Armadillo repeat-containing protein 2	MLS*PNDKMLGK	1	1232.63	3	3.7529	54.539	yes
Q9UBC0	Hepatocyte nuclear factor 6 (HNF-6) (One cut domain family member 1) (One cut homeobox 1)	MLT*PNGFEAHHPAMLGR	1	1877.9	3	5.1926	42.257	yes
Q96LK0	Centrosomal protein of 19 kDa (Cep19)	MMCT*AKK	1	811.375	3	0.2164	40.778	yes
Q9Y4E5	E3 SUMO-protein ligase ZNF451 (EC 2.3.2.-) (Coactivator for steroid receptors) (E3 SUMO-protein transferase ZNF451) (Zinc finger protein 451)	MNLKDKS*HEGVACVQK	1	1785.89	3	3.1259	54.09	yes
Q6SJ93	Protein FAM111B (Cancer-associated nucleoprotein)	MNLS*PAK	1	759.395	2	0.80415	78.616	yes
Q05BV3	Echinoderm microtubule-associated protein-like 5 (EMAP-5)	MNPYVPDKLIT*AGIK	1	1658.91	3	1.6894	48.711	yes
Q9UG63	ATP-binding cassette sub-family F member 2 (Iron-inhibited ABC transporter 2)	MPS*DLAK	1	760.379	2	4.9144	43.808	yes
O15315	DNA repair protein RAD51 homolog 2 (R51H2) (RAD51 homolog B) (Rad51B) (RAD51-like protein 1)	MQT*AYGIKAQR	1	1265.65	2	4.5573	55.353	yes
Q8NFV4	Protein ABHD11 (EC 3.-.-.-) (Alpha/beta hydrolase domain-containing protein 11) (Abhydrolase domain-containing protein 11) (Williams-Beuren syndrome chromosomal region 21 protein)	MRAGQQLAS*MLR	1	1360.71	3	4.9467	66.004	yes
P08476	Inhibin beta A chain (Activin beta-A chain) (Erythroid differentiation protein) (EDF)	MRGHS*PFANLK	1	1256.64	3	1.6351	55.04	yes
Q9Y6X9	MORC family CW-type zinc finger protein 2 (Zinc finger CW-type coiled-coil domain protein 1)	MRIFIHGHKVQT*K	1	1593.89	3	0.87382	40.767	yes
Q07157	Tight junction protein ZO-1 (Tight junction protein 1) (Zona occludens protein 1) (Zonula occludens protein 1)	MRLCPES*RK	1	1118.57	2	0.7257	44.612	yes
Q8TE56	A disintegrin and metalloproteinase with thrombospondin motifs 17 (ADAM-TS 17) (ADAM-TS17) (ADAMTS-17) (EC 3.4.24.-)	MRQPPPNS*	1	925.444	2	3.903	52.716	yes
P23526	Adenosylhomocysteinase (AdoHcyase) (EC 3.3.1.1) (S-adenosyl-L-homocysteine hydrolase)	MS*DKLPYKVADIGLAAWGR	1	2090.1	4	3.4477	47.603	yes
Q9H4I9	Essential MCU regulator, mitochondrial (Single-pass membrane protein with aspartate-rich tail 1, mitochondrial)	MS*FGLLR	1	822.442	3	1.2712	46.663	yes
O94901	SUN domain-containing protein 1 (Protein unc-84 homolog A) (Sad1/unc-84 protein-like 1)	MS*HLEDILGK	1	1141.58	2	4.3039	44.543	yes
Q96HA7	Tonsoku-like protein (Inhibitor of kappa B-related protein) (I-kappa-B-related protein) (IkappaBR) (NF-kappa-B inhibitor-like protein 2) (Nuclear factor of kappa light polypeptide gene enhancer in B-cells inhibitor-like 2)	MS*LERELR	1	1032.54	2	2.7268	53.775	yes
Q96M83	Coiled-coil domain-containing protein 7 (Protein BIOT2)	MS*PEKEFK	1	994.479	3	3.4735	43.808	yes
Q9H2T7	Ran-binding protein 17	MVAS*VPFVK	1	976.542	2	1.3659	46.462	yes
Q70YC5	Protein ZNF365 (DISC1-binding zinc-finger protein) (Protein su48)	MVEAVDRT*IEK	1	1289.66	2	0.66133	54.343	yes
Q70YC5	Protein ZNF365 (DISC1-binding zinc-finger protein) (Protein su48)	MVEAVDRT*IEKR	1	1445.77	3	2.5624	45.661	yes
Q9UHV9	Prefoldin subunit 2	MVGGVLVERT*VK	1	1286.74	3	0.079285	52.891	yes
P52788	Spermine synthase (SPMSY) (EC 2.5.1.22) (Spermidine aminopropyltransferase)	MVT*MVEIDQMVIDGCKK	1	1938.93	4	2.7832	58.123	yes
Q6UB35	Monofunctional C1-tetrahydrofolate synthase, mitochondrial (EC 6.3.4.3) (Formyltetrahydrofolate synthetase)	MVVAS*DK	1	748.379	2	2.0496	43	yes
Q9BQ52	Zinc phosphodiesterase ELAC protein 2 (EC 3.1.26.11) (ElaC homolog protein 2) (Heredity prostate cancer protein 2) (Ribonuclease Z 2) (RNase Z 2) (tRNA 3 endonuclease 2) (tRNase Z 2)	MWALCS*LLR	1	1091.56	3	2.0893	58.981	yes
A2VCL2	Coiled-coil domain-containing protein 162 (Coiled-coil domain-containing protein 162 pseudogene)	MWKQQDS*QAQLLKELEHR	1	2267.15	3	0.415	54.402	yes
Q96MK2	RIPOR family member 3	MYGT*LRK	1	867.464	2	4.4486	41.302	yes
Q6ZTZ1	Myb/SANT-like DNA-binding domain-containing protein 1	NAKVYEKMAS*K	1	1267.66	3	4.5273	50.452	yes
Q9NSI6	Bromodomain and WD repeat-containing protein 1 (WD repeat-containing protein 9)	NAS*AVARKK	1	943.556	3	1.0329	64.654	yes
O14965	Aurora kinase A (EC 2.7.11.1) (Aurora 2) (Aurora/IPL1-related kinase 1) (ARK-1) (Aurora-related kinase 1) (hARK1) (Breast tumor-amplified kinase) (Serine/threonine-protein kinase 15) (Serine/threonine-protein kinase 6) (Serine/threonine-protein kinase aurora-A)	NEES*KKR	1	889.462	3	3.8722	49.358	yes
Q9Y5B9	FACT complex subunit SPT16 (Chromatin-specific transcription elongation factor 140 kDa subunit) (FACT 140 kDa subunit) (FACTp140) (Facilitates chromatin transcription complex subunit SPT16) (hSPT16)	NEMT*AEEKRR	1	1262.6	2	0.069015	51.762	yes
Q29RF7	Sister chromatid cohesion protein PDS5 homolog A (Cell proliferation-inducing gene 54 protein) (Sister chromatid cohesion protein 112) (SCC-112)	NENNS*HAFMKKMAENIK	1	2004.95	3	1.0868	44.252	yes
O15247	Chloride intracellular channel protein 2 (XAP121)	NFEKS*LLKEFK	1	1381.76	3	1.0845	57.347	yes
Q01484	Ankyrin-2 (ANK-2) (Ankyrin-B) (Brain ankyrin) (Non-erythroid ankyrin)	NGYT*PLHIAAKK	1	1311.73	2	0.61283	42.317	yes
Q9UJW8	Zinc finger protein 180 (HHZ168)	NHFHKHVS*HAKK	1	1468.78	3	4.4132	46.796	yes
O14545	TRAF-type zinc finger domain-containing protein 1 (Protein FLN29)	NIGMCPT*CK	1	965.413	2	5.1725	55.806	yes
O75116	Rho-associated protein kinase 2 (EC 2.7.11.1) (Rho kinase 2) (Rho-associated, coiled-coil-containing protein kinase 2) (Rho-associated, coiled-coil-containing protein kinase II) (ROCK-II) (p164 ROCK-2)	NKIYES*IEEAK	1	1322.67	2	3.4679	45.347	yes
Q8N1H7	Protein SIX6OS1 (Six6 opposite strand transcript 1)	NKNT*ENRK	1	1002.52	2	4.7242	43.769	yes
Q14692	Ribosome biogenesis protein BMS1 homolog (Ribosome assembly protein BMS1 homolog)	NKPKT*QAKAGK	1	1169.69	2	1.7016	43.897	yes
Q12789	General transcription factor 3C polypeptide 1 (TF3C-alpha) (TFIIIC box B-binding subunit) (Transcription factor IIIC 220 kDa subunit) (TFIIIC 220 kDa subunit) (TFIIIC220) (Transcription factor IIIC subunit alpha)	NLS*EEGLLRLYR	1	1461.79	2	3.6344	49.632	yes
Q8NG31	Kinetochore scaffold 1 (ALL1-fused gene from chromosome 15q14 protein) (AF15q14) (Bub-linking kinetochore protein) (Blinkin) (Cancer susceptibility candidate gene 5 protein) (Cancer/testis antigen 29) (CT29) (Kinetochore-null protein 1) (Protein CASC5) (Protein D40/AF15q14)	NLWEKMRHCS*DK	1	1545.72	3	4.201	55.98	yes
Q9UBW7	Zinc finger MYM-type protein 2 (Fused in myeloproliferative disorders protein) (Rearranged in atypical myeloproliferative disorder protein) (Zinc finger protein 198)	NPLT*MENKACLR	1	1388.69	3	2.7129	45.829	yes
Q8IY18	Structural maintenance of chromosomes protein 5 (SMC protein 5) (SMC-5) (hSMC5)	NQS*FWFINK	1	1182.58	3	0.70107	67.214	yes
Q8NEL9	Phospholipase DDHD1 (EC 3.1.1.-) (DDHD domain-containing protein 1) (Phosphatidic acid-preferring phospholipase A1 homolog) (PA-PLA1)	NT*AMMREAARK	1	1277.63	3	3.7462	71.03	yes
Q9NVC6	Mediator of RNA polymerase II transcription subunit 17 (Activator-recruited cofactor 77 kDa component) (ARC77) (Cofactor required for Sp1 transcriptional activation subunit 6) (CRSP complex subunit 6) (Mediator complex subunit 17) (Thyroid hormone receptor-associated protein complex 80 kDa component) (Trap80) (Transcriptional coactivator CRSP77) (Vitamin D3 receptor-interacting protein complex 80…	NT*DLDLDK	1	932.445	2	2.3818	66.27	yes
Q96CT7	Coiled-coil domain-containing protein 124	PKKFQGENT*K	1	1175.63	3	0.044674	56.432	yes
Q7Z3B3	KAT8 regulatory NSL complex subunit 1 (MLL1/MLL complex subunit KANSL1) (MSL1 homolog 1) (hMSL1v1) (NSL complex protein NSL1) (Non-specific lethal 1 homolog)	QADIES*RARR	1	1200.63	3	5.2279	50.46	yes
P17035	Zinc finger protein 28 (Zinc finger protein KOX24)	QAS*HHIGDFCFQKIEK	1	1886.91	3	2.1686	45.722	yes
Q5VIY5	Zinc finger protein 468	QAS*HHIGEFCFHEIEK	1	1910.87	3	2.5332	44.252	yes
O75521	Enoyl-CoA delta isomerase 2, mitochondrial (EC 5.3.3.8) (DRS-1) (Delta(3),delta(2)-enoyl-CoA isomerase) (D3,D2-enoyl-CoA isomerase) (Diazepam-binding inhibitor-related protein 1) (DBI-related protein 1) (Dodecenoyl-CoA isomerase) (Hepatocellular carcinoma-associated antigen 88) (Peroxisomal 3,2-trans-enoyl-CoA isomerase) (pECI) (Renal carcinoma antigen NY-REN-1)	QAT*EGPCNMPKPGVFDLINKAK	1	2357.19	3	2.3106	44.158	yes
Q8IWJ2	GRIP and coiled-coil domain-containing protein 2 (185 kDa Golgi coiled-coil protein) (GCC185) (CLL-associated antigen KW-11) (CTCL tumor antigen se1-1) (Ran-binding protein 2-like 4) (RanBP2L4) (Renal carcinoma antigen NY-REN-53)	QCEAS*EKNIQK	1	1276.61	2	3.8398	46.844	yes
O00566	U3 small nucleolar ribonucleoprotein protein MPP10 (M phase phosphoprotein 10)	QDIS*VHK	1	825.434	2	4.6017	113.5	yes
Q9H2J4	Phosducin-like protein 3 (HTPHLP) (PhPL3) (Viral IAP-associated factor 1) (VIAF-1)	QDPNADT*EWNDILR	1	1685.76	3	1.5173	56.956	yes
Q06265	Exosome complex component RRP45 (Autoantigen PM/Scl 1) (Exosome component 9) (P75 polymyositis-scleroderma overlap syndrome-associated autoantigen) (Polymyositis/scleroderma autoantigen 1) (Polymyositis/scleroderma autoantigen 75 kDa) (PM/Scl-75)	QEKAPS*K	1	786.424	2	1.6926	51.066	yes
Q8NHV4	Protein NEDD1 (Neural precursor cell expressed developmentally down-regulated protein 1) (NEDD-1)	QFHMQLNEMHS*LLER	1	1911.91	3	4.147	43.594	yes
P49754	Vacuolar protein sorting-associated protein 41 homolog (S53)	QFVT*GGK	1	735.392	2	3.8447	47.743	yes
Q8WUA7	TBC1 domain family member 22A	QIHIDIPRMS*PEALILQPK	1	2198.22	3	4.3005	42.818	yes
Q7RTS5	Otopetrin-3	QKS*WLVR	1	915.529	2	1.4408	52.482	yes
Q86X02	Cerebellar degeneration-related protein 2-like (Paraneoplastic 62 kDa antigen)	QLDT*LRHVNEQHAK	1	1687.88	3	1.5613	71.354	yes
O75179	Ankyrin repeat domain-containing protein 17 (Gene trap ankyrin repeat protein) (Serologically defined breast cancer antigen NY-BR-16)	QLFVT*VVK	1	932.569	3	1.4596	68.786	yes
O00635	E3 ubiquitin-protein ligase TRIM38 (EC 2.3.2.27) (RING finger protein 15) (RING-type E3 ubiquitin transferase TRIM38) (Tripartite motif-containing protein 38) (Zinc finger protein RoRet)	QLGS*LIEALK	1	1070.63	4	2.1108	43.594	yes
Q5XPI4	E3 ubiquitin-protein ligase RNF123 (EC 2.3.2.27) (Kip1 ubiquitination-promoting complex protein 1) (RING finger protein 123) (RING-type E3 ubiquitin transferase RNF123)	QLMMS*LLRLYR	1	1422.78	3	3.0083	41.704	yes
Q14562	ATP-dependent RNA helicase DHX8 (EC 3.6.4.13) (DEAH box protein 8) (RNA helicase HRH1)	QMIAANVLS*K	1	1073.59	3	4.93	54.066	yes
Q8NHW5	60S acidic ribosomal protein P0-like (Large ribosomal subunit protein uL10-like)	QMQQIRMS*LR	1	1289.67	3	1.45	41.218	yes
Q9NQZ7	Ectonucleoside triphosphate diphosphohydrolase 7 (NTPDase 7) (EC 3.6.1.-) (Lysosomal apyrase-like protein 1)	QMRDRNS*QPVVK	1	1456.76	3	2.726	55.98	yes
Q5VTJ3	Kelch domain-containing protein 7A	QNLEALKEAAYKVMS*ENYLQVLR	1	2709.42	4	1.2709	40.384	yes
P27816	Microtubule-associated protein 4 (MAP-4)	QPAGKVQIVS*KK	1	1281.78	2	2.902	42.317	yes
Q07283	Trichohyalin	QQLLKS*EEQEERR	1	1671.85	3	4.1327	48.899	yes
Q8IYS1	Peptidase M20 domain-containing protein 2 (Aminoacylase-1-like protein 2)	QQMKPT*WR	1	1073.54	2	1.5475	42.336	yes
Q8TDJ6	DmX-like protein 2 (Rabconnectin-3)	QS*EVEADLGYPGGKAK	1	1647.81	2	3.9203	49.708	yes
Q92878	DNA repair protein RAD50 (hRAD50) (EC 3.6.-.-)	QS*IIDLKEK	1	1072.61	3	2.6917	41.427	yes
Q6RI45	Bromodomain and WD repeat-containing protein 3	QS*LKCNPDAWK	1	1288.62	2	3.0232	51.286	yes
Q9H078	Caseinolytic peptidase B protein homolog (EC 3.6.1.3) (Suppressor of potassium transport defect 3)	QT*AKYMHK	1	1005.51	3	0.4987	55.676	yes
Q96LD1	Zeta-sarcoglycan (Zeta-SG) (ZSG1)	QT*VYELCVCPNGK	1	1452.67	2	3.1717	60.08	yes
O60502	Protein O-GlcNAcase (OGA) (EC 3.2.1.169) (Beta-N-acetylglucosaminidase) (Beta-N-acetylhexosaminidase) (Beta-hexosaminidase) (Meningioma-expressed antigen 5) (N-acetyl-beta-D-glucosaminidase) (N-acetyl-beta-glucosaminidase) (Nuclear cytoplasmic O-GlcNAcase and acetyltransferase) (NCOAT)	QVAHS*GAK	1	796.419	3;4	0.040094	87.713	yes
Q6SPF0	Atherin (Sterile alpha motif domain-containing protein 1) (SAM domain-containing protein 1)	QVFS*MAAMNK	1	1125.53	2	5.1097	42.338	yes
Q5T8D3	Acyl-CoA-binding domain-containing protein 5	QVGS*GGDGER	1	960.426	2	5.7018	63.602	yes
Q9UPP5	Uncharacterized protein KIAA1107	QVHT*ALPKVNAKIVAMPK	1	1944.13	3	1.7359	42.314	yes
Q5QJ38	Trichohyalin-like protein 1 (Basalin) (Protein S100-A17) (S100 calcium-binding protein A17)	QVT*KPEK	1	828.471	2	0.19458	75.109	yes
Q6ZP65	BICD family-like cargo adapter 1 (Bicaudal D-related protein 1) (BICD-related protein 1) (BICDR-1) (Coiled-coil domain-containing protein 64A) (CCDC64A)	QYEQMHKELT*DKLEHLEQEK	1	2555.23	3	0.21547	41.422	yes
Q8NEP9	Zinc finger protein 555	QYEYNT*YGKVFMHR	1	1834.85	4	3.2639	47.712	yes
Q14683	Structural maintenance of chromosomes protein 1A (SMC protein 1A) (SMC-1-alpha) (SMC-1A) (Sb1.8)	RAAT*LAQELEK	1	1228.68	3	0.16513	64.224	yes
Q99424	Peroxisomal acyl-coenzyme A oxidase 2 (EC 1.17.99.3) (3-alpha,7-alpha,12-alpha-trihydroxy-5-beta-cholestanoyl-CoA 24-hydroxylase) (3-alpha,7-alpha,12-alpha-trihydroxy-5-beta-cholestanoyl-CoA oxidase) (Trihydroxycoprostanoyl-CoA oxidase) (THCA-CoA oxidase) (THCCox)	RACGGHGYS*K	1	1034.47	3	0.24673	58.246	yes
Q9NRG4	N-lysine methyltransferase SMYD2 (EC 2.1.1.-) (HSKM-B) (Histone methyltransferase SMYD2) (EC 2.1.1.43) (Lysine N-methyltransferase 3C) (SET and MYND domain-containing protein 2)	RAEGLGGLERFCS*PGK	1	1675.85	3	0.58657	53.3	yes
Q16678	Cytochrome P450 1B1 (EC 1.14.14.1) (CYPIB1)	RCIGEELS*K	1	1033.52	3	4.8479	67.897	yes
Q2V2M9	FH1/FH2 domain-containing protein 3 (Formactin-2) (Formin homolog overexpressed in spleen 2) (hFHOS2)	RCREFLWS*K	1	1223.62	3	1.6517	63.419	yes
Q8ND04	Protein SMG8 (Amplified in breast cancer gene 2 protein) (Protein smg-8 homolog)	RFMCS*GPDK	1	1039.46	3	4.0116	48.794	yes
Q7Z7F0	KH homology domain-containing protein 4 (Brings lots of money 7) (Pre-mRNA splicing factor protein KHDC4)	RFT*EELPDER	1	1290.62	2	4.6433	53.6	yes
Q8N1N5	Cysteine-rich PAK1 inhibitor (CRIPak)	RGVPACS*R	1	844.434	3	5.141	58.592	yes
Q6TDP4	Kelch-like protein 17 (Actinfilin)	RHYHDAFVAMS*R	1	1488.7	2	4.2569	41.495	yes
Q5QJE6	Deoxynucleotidyltransferase terminal-interacting protein 2 (Estrogen receptor-binding protein) (LPTS-interacting protein 2) (LPTS-RP2) (Terminal deoxynucleotidyltransferase-interacting factor 2) (TdIF2) (TdT-interacting factor 2)	RKYS*EIMAEK	1	1253.64	3	5.4325	55.084	yes
Q9Y2Z4	Tyrosine--tRNA ligase, mitochondrial (EC 6.1.1.1) (Tyrosyl-tRNA synthetase) (TyrRS)	RLAAEVT*K	1	886.524	2	4.4238	54.157	yes
Q969Z0	FAST kinase domain-containing protein 4 (Cell cycle progression restoration protein 2) (Cell cycle progression protein 2) (Protein TBRG4) (Transforming growth factor beta regulator 4)	RLAFLRWEFPNFNS*R	1	1952.02	4	5.4584	44.998	yes
P38919	Eukaryotic initiation factor 4A-III (eIF-4A-III) (eIF4A-III) (EC 3.6.4.13) (ATP-dependent RNA helicase DDX48) (ATP-dependent RNA helicase eIF4A-3) (DEAD box protein 48) (Eukaryotic initiation factor 4A-like NUK-34) (Eukaryotic translation initiation factor 4A isoform 3) (Nuclear matrix protein 265) (NMP 265) (hNMP 265) [Cleaved into: Eukaryotic initiation factor 4A-III, N-terminally processed]	RLLKEEDMT*K	1	1261.67	2	5.9697	40.496	yes
Q9UHD8	Septin-9 (MLL septin-like fusion protein MSF-A) (MLL septin-like fusion protein) (Ovarian/Breast septin) (Ov/Br septin) (Septin D1)	RMEPPAS*K	1	914.464	2	2.8919	55.531	yes
Q6PHW0	Iodotyrosine deiodinase 1 (IYD-1) (EC 1.21.1.1) (Iodotyrosine dehalogenase 1)	RMGHRWVT*DLK	1	1397.73	3	4.2727	46.069	yes
Q86YW9	Mediator of RNA polymerase II transcription subunit 12-like protein (Mediator complex subunit 12-like protein) (Thyroid hormone receptor-associated-like protein) (Trinucleotide repeat-containing gene 11 protein-like)	RMS*VNCEKLVK	1	1305.69	3	1.0874	69.352	yes
Q9NQ32	Uncharacterized protein C11orf16	RNGPEPCLGKPGT*R	1	1480.76	3	1.6607	55.196	yes
Q6ZU67	BEN domain-containing protein 4 (Coiled-coil domain-containing protein 4)	RPLDPVKVT*CLREFIR	1	1941.1	3	1.3545	45.084	yes
Q5VWG9	Transcription initiation factor TFIID subunit 3 (140 kDa TATA box-binding protein-associated factor) (TBP-associated factor 3) (Transcription initiation factor TFIID 140 kDa subunit) (TAF(II)140) (TAF140) (TAFII-140) (TAFII140)	RPLDS*PEAEELPAMK	1	1681.83	3	3.2216	41.227	yes
O00139	Kinesin-like protein KIF2A (Kinesin-2) (hK2)	RPLNKKET*QMK	1	1371.77	2	0.3917	41.689	yes
Q9UC06	Zinc finger protein 70 (Zinc finger protein N27C7-1)	RPYECRECGKDFS*R	1	1744.78	4	1.6518	44.511	yes
Q9UL63	Muskelin	RQIYT*LGR	1	1005.57	2	4.3439	50.452	yes
Q6RI45	Bromodomain and WD repeat-containing protein 3	RQS*LKCNPDAWK	1	1444.72	2	5.1097	42.629	yes
Q15149	Plectin (PCN) (PLTN) (Hemidesmosomal protein 1) (HD1) (Plectin-1)	RQVQDES*QR	1	1144.56	2	0.16649	57.164	yes
Q3V6T2	Girdin (Akt phosphorylation enhancer) (APE) (Coiled-coil domain-containing protein 88A) (G alpha-interacting vesicle-associated protein) (GIV) (Girders of actin filament) (Hook-related protein 1) (HkRP1)	RRGNWIT*LK	1	1142.67	2	4.6079	47.603	yes
Q9BY78	E3 ubiquitin-protein ligase RNF26 (EC 2.3.2.27) (RING finger protein 26)	RS*EAEEEEAR	1	1204.53	2	5.2828	58.699	yes
Q96QE5	Transcription elongation factor, mitochondrial	RS*INIVEHR	1	1122.63	2	2.0267	94.309	yes
Q8NCD3	Holliday junction recognition protein (14-3-3-associated AKT substrate) (Fetal liver-expressing gene 1 protein) (Up-regulated in lung cancer 9)	RS*LEAGRCLPK	1	1228.67	3	3.6596	50.791	yes
Q7Z3I7	Zinc finger protein 572	RT*HIGEKPYK	1	1227.67	2	5.8099	41.704	yes
Q7Z7B0	Filamin-A-interacting protein 1 (FILIP)	RT*VYELENEKHK	1	1544.79	3	4.9193	46.797	yes
Q6PF15	Kelch-like protein 35	RVAAAFS*LAPLAER	1	1470.83	3	4.9351	52.576	yes
Q96HW7	Integrator complex subunit 4 (Int4)	RVYEEFT*K	1	1070.54	3	3.9234	52.482	yes
O60264	SWI/SNF-related matrix-associated actin-dependent regulator of chromatin subfamily A member 5 (SWI/SNF-related matrix-associated actin-dependent regulator of chromatin A5) (EC 3.6.4.-) (Sucrose nonfermenting protein 2 homolog) (hSNF2H)	RWVPT*LR	1	926.545	2	0.54242	51.335	yes
Q8NFF5	FAD synthase (EC 2.7.7.2) (FAD pyrophosphorylase) (FMN adenylyltransferase) (Flavin adenine dinucleotide synthase) [Includes: Molybdenum cofactor biosynthesis protein-like region; FAD synthase region]	RYNLQMLEAEGS*MK	1	1668.8	3	3.378	42.947	yes
P46779	60S ribosomal protein L28 (Large ribosomal subunit protein eL28)	S*AHLQWMVVR	1	1225.64	3	3.1905	45.368	yes
Q5T0J7	Testis-expressed protein 35	S*AKRAELK	1	901.535	2	2.2023	59.35	yes
Q33E94	Transcription factor RFX4 (Regulatory factor X 4) (Testis development protein NYD-SP10)	S*ALYMHYLDFCEK	1	1618.72	3	0.087269	54.023	yes
P0C880	Putative uncharacterized protein FLJ40606	S*ARPPVLPPPPRPPQRRCR	1	2176.23	4	3.639	42.818	yes
Q14584	Zinc finger protein 266 (Zinc finger protein HZF1)	S*EKPYKCK	1	981.495	2	1.0782	43.808	yes
Q8N5C8	TGF-beta-activated kinase 1 and MAP3K7-binding protein 3 (Mitogen-activated protein kinase kinase kinase 7-interacting protein 3) (NF-kappa-B-activating protein 1) (TAK1-binding protein 3) (TAB-3) (TGF-beta-activated kinase 1-binding protein 3)	S*EVNGMEHDLMQRR	1	1700.77	2	5.4336	45.438	yes
P52298	Nuclear cap-binding protein subunit 2 (20 kDa nuclear cap-binding protein) (Cell proliferation-inducing gene 55 protein) (NCBP 20 kDa subunit) (CBP20) (NCBP-interacting protein 1) (NIP1)	S*GDIKKIIMGLDK	1	1416.8	3	1.2341	58.079	yes
O60716	Catenin delta-1 (Cadherin-associated Src substrate) (CAS) (p120 catenin) (p120(ctn)) (p120(cas))	S*GDLGDMEPLK	1	1160.54	2	5.9651	47.228	yes
O60828	Polyglutamine-binding protein 1 (PQBP-1) (38 kDa nuclear protein containing a WW domain) (Npw38) (Polyglutamine tract-binding protein 1)	S*HEKLDRGHDK	1	1320.65	3	2.4555	46.844	yes
P53007	Tricarboxylate transport protein, mitochondrial (Citrate transport protein) (CTP) (Solute carrier family 25 member 1) (Tricarboxylate carrier protein)	S*HPPRYR	1	911.473	3	1.0327	55.441	yes
P42226	Signal transducer and activator of transcription 6 (IL-4 Stat)	S*HYKPEQMGK	1	1203.57	2	0.4151	46.819	yes
Q92819	Hyaluronan synthase 2 (EC 2.4.1.212) (Hyaluronate synthase 2) (Hyaluronic acid synthase 2) (HA synthase 2)	S*ICIMQKWGGK	1	1249.63	3	4.091	69.846	yes
Q09019	Dystrophia myotonica WD repeat-containing protein (Dystrophia myotonica-containing WD repeat motif protein) (Protein 59) (Protein DMR-N9)	S*IDLNKPIDKR	1	1297.74	3	3.6689	43.761	yes
Q6N022	Teneurin-4 (Ten-4) (Protein Odd Oz/ten-m homolog 4) (Tenascin-M4) (Ten-m4) (Teneurin transmembrane protein 4)	S*ILGVQCEVQK	1	1202.63	3	3.5268	79.283	yes
Q9BRT6	Protein LLP homolog (Protein LAPS18-like)	S*KAKAVK	1	730.47	2	0.77988	69.198	yes
Q96DY7	Mdm2-binding protein (hMTBP)	S*KDLNCLYPR	1	1207.6	3;4	1.2538	60.064	yes
Q13576	Ras GTPase-activating-like protein IQGAP2	S*KFLGVEMEK	1	1166.6	3	1.1624	55.461	yes
Q92576	PHD finger protein 3	S*KHREGEK	1	969.499	2	5.2298	53.493	yes
Q9P219	Protein Daple (Coiled-coil domain-containing protein 88C) (Dvl-associating protein with a high frequency of leucine residues) (hDaple) (Hook-related protein 2) (HkRP2)	S*KLHDLELDR	1	1224.65	4	3.6772	52.579	yes
Q9NVI1	Fanconi anemia group I protein (Protein FACI)	S*KVNLMQHMK	1	1214.63	3	0.31635	51.276	yes
Q14149	MORC family CW-type zinc finger protein 3 (Nuclear matrix protein 2) (Zinc finger CW-type coiled-coil domain protein 3)	S*LAYIERDVYRPK	1	1608.86	3	2.4037	46.324	yes
Q6PJG6	BRCA1-associated ATM activator 1 (BRCA1-associated protein required for ATM activation protein 1)	S*LDLEGLR	1	901.487	3	4.2634	83.753	yes
Q86WA8	Lon protease homolog 2, peroxisomal (EC 3.4.21.53) (Lon protease-like protein 2) (Lon protease 2) (Peroxisomal Lon protease) (pLon)	S*LDRKLGAICR	1	1230.69	2	4.4792	47.302	yes
Q03001	Dystonin (230 kDa bullous pemphigoid antigen) (230/240 kDa bullous pemphigoid antigen) (Bullous pemphigoid antigen 1) (BPA) (Bullous pemphigoid antigen) (Dystonia musculorum protein) (Hemidesmosomal plaque protein)	S*LEEEKKEHVEK	1	1483.75	3	0.83665	42.843	yes
P22830	Ferrochelatase, mitochondrial (EC 4.99.1.1) (Heme synthase) (Protoheme ferro-lyase)	S*LGANMAAALR	1	1073.57	3	2.8706	49.189	yes
P0DJR0	GTPase IMAP family member GIMD1 (GIMAP family P-loop NTPase domain-containing protein 1)	S*LNEQRMK	1	1004.51	2	5.8391	45.68	yes
P10398	Serine/threonine-protein kinase A-Raf (EC 2.7.11.1) (Proto-oncogene A-Raf) (Proto-oncogene A-Raf-1) (Proto-oncogene Pks)	S*LPKIER	1	841.502	2	1.7641	56.721	yes
Q99543	DnaJ homolog subfamily C member 2 (M-phase phosphoprotein 11) (Zuotin-related factor 1) [Cleaved into: DnaJ homolog subfamily C member 2, N-terminally processed]	S*LQKLDPHQKDDINK	1	1777.93	2	3.1458	47.774	yes
Q7L804	Rab11 family-interacting protein 2 (Rab11-FIP2) (NRip11)	S*LVGLDK	1	730.423	2	3.9102	63.306	yes
Q6ZN01	MEF2-activating motif and SAP domain-containing transcriptional regulator (MEF2-activating SAP transcriptional regulatory protein)	S*MLLERMR	1	1034.54	2	0.77721	66.073	yes
Q8N157	Jouberin (Abelson helper integration site 1 protein homolog) (AHI-1)	S*MMALQEEK	1	1065.48	3	4.5183	59.35	yes
Q9C0G0	Zinc finger protein 407	S*NCAENIRK	1	1033.5	2	2.7826	46.462	yes
O43548	Protein-glutamine gamma-glutamyltransferase 5 (EC 2.3.2.13) (Transglutaminase X) (TG(X)) (TGX) (TGase X) (Transglutaminase-5) (TGase-5)	S*NKFKDIK	1	978.55	2	5.9846	55.37	yes
Q96NW7	Leucine-rich repeat-containing protein 7 (Densin-180) (Densin) (Protein LAP1)	S*NKLEFLPEEIGQMQK	1	1889.96	4	4.724	44.44	yes
Q9UJU3	Zinc finger protein 112 (Zfp-112) (Zinc finger protein 228)	S*NLQAHQR	1	952.484	2	5.9911	62.546	yes
Q15643	Thyroid receptor-interacting protein 11 (TR-interacting protein 11) (TRIP-11) (Clonal evolution-related gene on chromosome 14 protein) (Golgi-associated microtubule-binding protein 210) (GMAP-210) (Trip230)	S*NQELER	1	874.414	2	2.4489	71.296	yes
Q9UHH9	Inositol hexakisphosphate kinase 2 (InsP6 kinase 2) (EC 2.7.4.21) (P(i)-uptake stimulator) (PiUS)	S*PAFRAMDVEPR	1	1374.67	3	3.2359	41.242	yes
Q9H8X3	Putative uncharacterized protein LINC00574	S*PAGAHPALCPFHK	1	1431.71	3	1.4625	47.991	yes
Q9Y3Q8	TSC22 domain family protein 4 (TSC22-related-inducible leucine zipper protein 2) (Tsc-22-like protein THG-1)	S*PDPFGAVAAQK	1	1186.6	3	3.3518	52.247	yes
Q9C093	Sperm flagellar protein 2 (Protein KPL2)	S*PQMGANKKVK	1	1186.65	4	4.2549	59.227	yes
Q6ZUT3	FERM domain-containing protein 7	S*PRNIRMK	1	1000.56	3	0.7253	42.869	yes
P60228	Eukaryotic translation initiation factor 3 subunit E (eIF3e) (Eukaryotic translation initiation factor 3 subunit 6) (Viral integration site protein INT-6 homolog) (eIF-3 p48)	S*QMLAMNIEKK	1	1291.66	3	4.8032	55.721	yes
Q12794	Hyaluronidase-1 (Hyal-1) (EC 3.2.1.35) (Hyaluronoglucosaminidase-1) (Lung carcinoma protein 1) (LuCa-1)	S*QMYVQHR	1	1047.49	3	4.2078	55.531	yes
Q1KMD3	Heterogeneous nuclear ribonucleoprotein U-like protein 2 (Scaffold-attachment factor A2) (SAF-A2)	S*RGQGYVGGQRR	1	1319.68	3	0.4339	58.116	yes
Q9P281	BAH and coiled-coil domain-containing protein 1 (Bromo adjacent homology domain-containing protein 2) (BAH domain-containing protein 2)	S*RKCQDR	1	891.434	2	2.3062	56.547	yes
Q6ZS27	Zinc finger protein 662	S*RLGRWPGYLNGGR	1	1587.84	3	4.3184	50.966	yes
O43809	Cleavage and polyadenylation specificity factor subunit 5 (Cleavage and polyadenylation specificity factor 25 kDa subunit) (CFIm25) (CPSF 25 kDa subunit) (Nucleoside diphosphate-linked moiety X motif 21) (Nudix motif 21) (Pre-mRNA cleavage factor Im 25 kDa subunit)	S*VVPPNR	1	767.429	3	0.041017	52.683	yes
P20929	Nebulin	S*VYEKNKMK	1	1125.59	3	1.2918	57.859	yes
A6NE01	Protein FAM186A	S*YEGKEFQRNLK	1	1497.76	3	0.24655	62.466	yes
Q8IYA2	Putative coiled-coil domain-containing protein 144C (Coiled-coil domain-containing protein 144C pseudogene)	S*YMERNMLER	1	1327.6	2	2.5895	53.567	yes
P54803	Galactocerebrosidase (GALCERase) (EC 3.2.1.46) (Galactocerebroside beta-galactosidase) (Galactosylceramidase) (Galactosylceramide beta-galactosidase)	S*YNANYIKILR	1	1353.74	3	4.12	46.844	yes
Q13029	PR domain zinc finger protein 2 (EC 2.1.1.43) (GATA-3-binding protein G3B) (Lysine N-methyltransferase 8) (MTB-ZF) (MTE-binding protein) (PR domain-containing protein 2) (Retinoblastoma protein-interacting zinc finger protein) (Zinc finger protein RIZ)	T*ADAEIK	1	746.381	2	3.3432	50.966	yes
Q5H9K5	Zinc finger matrin-type protein 1	T*CFRKMR	1	940.474	3	0.85049	44.692	yes
P17040	Zinc finger and SCAN domain-containing protein 20 (Zinc finger protein 31) (Zinc finger protein 360) (Zinc finger protein KOX29)	T*CHQNRQVYR	1	1303.62	3	0.17582	50.034	yes
A6NM15	Deleted.	T*DLVPEEDVK	1	1143.57	2	3.6613	61.161	yes
Q9H0M4	Zinc finger CW-type PWWP domain protein 1	T*DPILPIRKR	1	1207.74	2	1.2963	41.876	yes
Q8IYR0	Cilia- and flagella-associated protein 206	T*DVCRMKEHMEDR	1	1648.71	3	2.5519	42.425	yes
Q8WVS4	WD repeat-containing protein 60	T*EFEKEPR	1	1034.5	3	1.8499	69.198	yes
Q96JS3	PiggyBac transposable element-derived protein 1 (Cerebral protein 4)	T*EKCPLMNVEHMK	1	1558.73	3	3.2232	47.548	yes
O96028	Histone-lysine N-methyltransferase NSD2 (EC 2.1.1.43) (Multiple myeloma SET domain-containing protein) (MMSET) (Nuclear SET domain-containing protein 2) (Protein trithorax-5) (Wolf-Hirschhorn syndrome candidate 1 protein)	T*EKPPPEPGKPKGK	1	1488.83	3	4.3782	58.098	yes
Q92845	Kinesin-associated protein 3 (KAP-3) (KAP3) (Smg GDS-associated protein)	T*ELKMRNK	1	1018.56	2	1.4018	60.478	yes
Q8NEU8	DCC-interacting protein 13-beta (Dip13-beta) (Adapter protein containing PH domain, PTB domain and leucine zipper motif 2)	T*EVGKEVAAAR	1	1129.61	3	2.5266	56.404	yes
O14709	Zinc finger protein 197 (Zinc finger protein with KRAB and SCAN domains 9) (ZnF20) (pVHL-associated KRAB domain-containing protein)	T*FGCKKCGK	1	970.473	2	2.5871	53.756	yes
Q92845	Kinesin-associated protein 3 (KAP-3) (KAP3) (Smg GDS-associated protein)	T*FKKYQGLVVK	1	1309.78	3	4.5731	50.46	yes
Q9NXH9	tRNA (guanine(26)-N(2))-dimethyltransferase (EC 2.1.1.216) (tRNA 2,2-dimethylguanosine-26 methyltransferase) (tRNA(guanine-26,N(2)-N(2)) methyltransferase) (tRNA(m(2,2)G26)dimethyltransferase)	T*FPCKRFK	1	1025.55	2	3.1419	69.198	yes
P43405	Tyrosine-protein kinase SYK (EC 2.7.10.2) (Spleen tyrosine kinase) (p72-Syk)	T*GPFEDLKENLIR	1	1530.8	3	1.3913	48.568	yes
Q6PKG0	La-related protein 1 (La ribonucleoprotein domain family member 1)	T*HFDYQFGYR	1	1332.59	2	2.3408	61.691	yes
P82675	28S ribosomal protein S5, mitochondrial (MRP-S5) (S5mt) (Mitochondrial small ribosomal subunit protein uS5m)	T*HIKMKK	1	884.527	3	5.8424	45.972	yes
Q16401	26S proteasome non-ATPase regulatory subunit 5 (26S protease subunit S5 basic) (26S proteasome subunit S5B)	T*IAEIFGNPNYLR	1	1506.78	3	3.1575	51.073	yes
Q9HAN9	Nicotinamide/nicotinic acid mononucleotide adenylyltransferase 1 (NMN/NaMN adenylyltransferase 1) (EC 2.7.7.1) (EC 2.7.7.18) (Nicotinamide-nucleotide adenylyltransferase 1) (NMN adenylyltransferase 1) (Nicotinate-nucleotide adenylyltransferase 1) (NaMN adenylyltransferase 1)	T*KAVPKVK	1	869.57	2	0.48159	43.808	yes
O15254	Peroxisomal acyl-coenzyme A oxidase 3 (EC 1.3.3.6) (Branched-chain acyl-CoA oxidase) (BRCACox) (Pristanoyl-CoA oxidase)	T*LLPMPGVMVGDIGK	1	1526.82	3	0.80534	45.207	yes
Q8N8K9	Uncharacterized protein KIAA1958	T*LQEHADLMYGDIELLK	1	1987.99	4	5.4984	48.919	yes
Q9UPP1	Histone lysine demethylase PHF8 (EC 1.14.11.27) (PHD finger protein 8)	T*LQGRAK	1	772.456	2	1.6653	60.972	yes
Q96RN5	Mediator of RNA polymerase II transcription subunit 15 (Activator-recruited cofactor 105 kDa component) (ARC105) (CTG repeat protein 7a) (Mediator complex subunit 15) (Positive cofactor 2 glutamine/Q-rich-associated protein) (PC2 glutamine/Q-rich-associated protein) (TPA-inducible gene 1 protein) (TIG-1) (Trinucleotide repeat-containing gene 7 protein)	T*LQKCEIALEK	1	1274.69	2	4.2948	47.844	yes
Q14202	Zinc finger MYM-type protein 3 (Zinc finger protein 261)	T*MRKGQK	1	847.47	2	2.8637	41.227	yes
Q9Y426	C2 domain-containing protein 2 (Transmembrane protein 24-like)	T*PIKVKVIEK	1	1153.74	2	1.2145	40.496	yes
Q9UM13	Anaphase-promoting complex subunit 10 (APC10) (Cyclosome subunit 10)	T*PPGADPK	1	781.397	2	4.8431	43.083	yes
P04053	DNA nucleotidylexotransferase (EC 2.7.7.31) (Terminal addition enzyme) (Terminal deoxynucleotidyltransferase) (Terminal transferase)	T*PPIAVQK	1	852.507	2	0.44684	86.833	yes
Q7Z6Z7	E3 ubiquitin-protein ligase HUWE1 (EC 2.3.2.26) (ARF-binding protein 1) (ARF-BP1) (HECT, UBA and WWE domain-containing protein 1) (HECT-type E3 ubiquitin transferase HUWE1) (Homologous to E6AP carboxyl terminus homologous protein 9) (HectH9) (Large structure of UREB1) (LASU1) (Mcl-1 ubiquitin ligase E3) (Mule) (Upstream regulatory element-binding protein 1) (URE-B1) (URE-binding protein 1)	T*QHNGMNNIIR	1	1296.64	3	2.6962	47.302	yes
Q9NS73	MAP3K12-binding inhibitory protein 1 (MAPK upstream kinase-binding inhibitory protein) (MUK-binding inhibitory protein)	T*QIHFDPEVVQIK	1	1552.82	3	3.4624	48.277	yes
Q9UPW8	Protein unc-13 homolog A (Munc13-1)	T*QNIIMVLKDRMK	1	1588.88	3	0.65163	56.872	yes
Q9UJS0	Calcium-binding mitochondrial carrier protein Aralar2 (Citrin) (Mitochondrial aspartate glutamate carrier 2) (Solute carrier family 25 member 13)	T*RMQNQR	1	932.461	3	1.378	64.757	yes
Q9H6N6	Putative uncharacterized protein MYH16 (Myosin heavy chain 16 pseudogene) (myosin heavy polypeptide 5)	T*VHELDDAEDR	1	1298.57	3	3.0124	48.284	yes
Q3T8J9	GON-4-like protein (GON-4 homolog)	T*VKELFEQLK	1	1233.7	4	2.403	58.754	yes
Q9UGL1	Lysine-specific demethylase 5B (EC 1.14.11.-) (Cancer/testis antigen 31) (CT31) (Histone demethylase JARID1B) (Jumonji/ARID domain-containing protein 1B) (PLU-1) (Retinoblastoma-binding protein 2 homolog 1) (RBP2-H1)	T*VNWQHR	1	939.467	2	1.0937	74.415	yes
Q6F5E8	Capping protein, Arp2/3 and myosin-I linker protein 2 (Capping protein regulator and myosin 1 linker 2) (F-actin-uncapping protein RLTPR) (Leucine-rich repeat-containing protein 16C) (RGD, leucine-rich repeat, tropomodulin and proline-rich-containing protein)	T*WLPGEGAVQNHVLALLR	1	1973.08	3	4.5245	46.15	yes
Q53GS9	U4/U6.U5 tri-snRNP-associated protein 2 (Inactive ubiquitin-specific peptidase 39) (SAD1 homolog) (U4/U6.U5 tri-snRNP-associated 65 kDa protein) (65K)	T*YKENFLKR	1	1197.65	3	1.5392	53.775	yes
Q69YN2	CWF19-like protein 1 (C19L1)	T*YYERLPYR	1	1259.63	3	1.8775	89.355	yes
Q2M389	WASH complex subunit 4 (Strumpellin and WASH-interacting protein) (SWIP) (WASH complex subunit SWIP)	VDDGS*QK	1	747.34	3	2.4241	54.722	yes
Q9UM82	Spermatogenesis-associated protein 2 (Spermatogenesis-associated protein PD1)	VECEQMLEIHS*QVKDK	1	1914.92	3	1.5156	51.166	yes
Q9BXW6	Oxysterol-binding protein-related protein 1 (ORP-1) (OSBP-related protein 1)	VEGYIQDKS*KK	1	1293.69	3	4.1448	54.199	yes
Q13155	Aminoacyl tRNA synthase complex-interacting multifunctional protein 2 (Multisynthase complex auxiliary component p38) (Protein JTV-1)	VELPT*CMYRLPNVHGR	1	1883.95	4	3.0434	45.876	yes
P57059	Serine/threonine-protein kinase SIK1 (EC 2.7.11.1) (Salt-inducible kinase 1) (SIK-1) (Serine/threonine-protein kinase SNF1-like kinase 1) (Serine/threonine-protein kinase SNF1LK)	VGFYDIERT*LGK	1	1396.74	2	3.2149	45.433	yes
Q9UJU6	Drebrin-like protein (Cervical SH3P7) (Cervical mucin-associated protein) (Drebrin-F) (HPK1-interacting protein of 55 kDa) (HIP-55) (SH3 domain-containing protein 7)	VGKDS*FWAKAEK	1	1364.71	3	4.7145	56.205	yes
O43830	Zinc finger protein 73 (Zinc finger protein 186) (hZNF2)	VHIGQT*FGK	1	985.535	2	2.3899	55.721	yes
Q96SK3	Zinc finger protein 607	VHT*GEKPFKCNKCR	1	1645.82	4	3.844	47.429	yes
Q9NPJ1	McKusick-Kaufman/Bardet-Biedl syndromes putative chaperonin (Bardet-Biedl syndrome 6 protein)	VIHPS*LKQFLNMHR	1	1718.94	3	3.3692	44.367	yes
P33076	MHC class II transactivator (CIITA) (EC 2.3.1.-) (EC 2.7.11.1)	VLPDMVS*LR	1	1028.57	2	0.74292	48.794	yes
Q96PN6	Adenylate cyclase type 10 (EC 4.6.1.1) (AH-related protein) (Adenylate cyclase homolog) (Germ cell soluble adenylyl cyclase) (hsAC) (sAC) (Testicular soluble adenylyl cyclase)	VMT*LLDEK	1	947.5	2	2.256	64.82	yes
Q86WI3	Protein NLRC5 (Caterpiller protein 16.1) (CLR16.1) (Nucleotide-binding oligomerization domain protein 27) (Nucleotide-binding oligomerization domain protein 4)	VNKGPRVT*VLLGK	1	1379.86	2	4.1247	42.031	yes
Q6ZU69	Protein FAM205A	VPGEKES*EK	1	1001.5	2;3	0.53247	82.426	yes
Q93008	Probable ubiquitin carboxyl-terminal hydrolase FAF-X (EC 3.4.19.12) (Deubiquitinating enzyme FAF-X) (Fat facets in mammals) (hFAM) (Fat facets protein-related, X-linked) (Ubiquitin thioesterase FAF-X) (Ubiquitin-specific protease 9, X chromosome) (Ubiquitin-specific-processing protease FAF-X)	VPGQEET*VK	1	985.508	2	4.1461	47.603	yes
Q9Y6X9	MORC family CW-type zinc finger protein 2 (Zinc finger CW-type coiled-coil domain protein 1)	VPLGT*FR	1	788.454	3	3.3722	48.174	yes
Q01664	Transcription factor AP-4 (Activating enhancer-binding protein 4) (Class C basic helix-loop-helix protein 41) (bHLHc41)	VPS*LQHFR	1	982.535	2	1.529	60.167	yes
Q96IC2	RNA exonuclease 5 (EC 3.1.-.-) (Exonuclease NEF-sp)	VRES*RQAPNK	1	1183.64	2	2.2898	74.533	yes
Q9UMQ6	Calpain-11 (EC 3.4.22.-) (Calcium-activated neutral proteinase 11) (CANP 11)	VS*EDDMDQDFLHLFKIVAGEGK	1	2492.19	4	1.7949	52.814	yes
Q9BWT7	Caspase recruitment domain-containing protein 10 (CARD-containing MAGUK protein 3) (Carma 3)	VS*RLEEECALLR	1	1416.74	3	0.2682	43.68	yes
Q3SYA9	Putative POM121-like protein 1	VT*AEDLDWEK	1	1204.56	3	4.5838	82.287	yes
Q15036	Sorting nexin-17	VT*RMRCWR	1	1106.56	2	4.5433	43.769	yes
P29375	Lysine-specific demethylase 5A (EC 1.14.11.-) (Histone demethylase JARID1A) (Jumonji/ARID domain-containing protein 1A) (Retinoblastoma-binding protein 2) (RBBP-2)	VVGLAMGT*K	1	874.495	3	1.1035	56.548	yes
P13929	Beta-enolase (EC 4.2.1.11) (2-phospho-D-glycerate hydro-lyase) (Enolase 3) (Muscle-specific enolase) (MSE) (Skeletal muscle enolase)	VVIGMDVAAS*EFYRNGK	1	1854.93	3	5.1337	65.565	yes
O15119	T-box transcription factor TBX3 (T-box protein 3)	VVT*FHKLK	1	970.596	2	3.1147	60.167	yes
Q99829	Copine-1 (Chromobindin 17) (Copine I)	VVT*MEVEAR	1	1032.53	2	3.4908	53.08	yes
O94763	Unconventional prefoldin RPB5 interactor 1 (Protein NNX3) (Protein phosphatase 1 regulatory subunit 19) (RNA polymerase II subunit 5-mediating protein) (RPB5-mediating protein)	VVT*NCQER	1	947.449	2	2.8014	60.118	yes
Q6P1K8	General transcription factor IIH subunit 2-like protein (General transcription factor IIH polypeptide 2-like protein)	WEGGYERT*WEILK	1	1665.82	4	1.8306	46.89	yes
Q00872	Myosin-binding protein C, slow-type (Slow MyBP-C) (C-protein, skeletal muscle slow isoform)	WFKGKWMDLAS*K	1	1495.76	3	5.9582	47.971	yes
Q93099	Homogentisate 1,2-dioxygenase (EC 1.13.11.5) (Homogentisate oxygenase) (Homogentisic acid oxidase) (Homogentisicase)	WGLKAS*RCLDENYHK	1	1818.88	3	2.1739	50.178	yes
Q9HAW4	Claspin (hClaspin)	WKNIDDAS*QMDLFHR	1	1874.87	4	2.2621	41.996	yes
Q5T7N2	LINE-1 type transposase domain-containing protein 1 (ES cell-associated protein 11)	WS*NVFKVLLEK	1	1361.77	4	4.0542	41.621	yes
Q16760	Diacylglycerol kinase delta (DAG kinase delta) (EC 2.7.1.107) (130 kDa diacylglycerol kinase) (Diglyceride kinase delta) (DGK-delta)	WS*VMAYEAKLPR	1	1449.74	3	4.8761	53.567	yes
Q15833	Syntaxin-binding protein 2 (Protein unc-18 homolog 2) (Unc18-2) (Protein unc-18 homolog B) (Unc-18B)	WT*PVIKDVMEDAVEDR	1	1901.92	4	0.99682	43.316	yes
P07197	Neurofilament medium polypeptide (NF-M) (160 kDa neurofilament protein) (Neurofilament 3) (Neurofilament triplet M protein)	YAKLT*EAAEQNK	1	1364.69	3	0.63499	54.09	yes
Q8WWQ0	PH-interacting protein (PHIP) (IRS-1 PH domain-binding protein) (WD repeat-containing protein 11)	YDKIADQMFFHS*DYRPLIR	1	2414.18	4	4.5077	46.892	yes
Q9NV58	E3 ubiquitin-protein ligase RNF19A (EC 2.3.2.27) (Double ring-finger protein) (Dorfin) (RING finger protein 19A) (p38)	YEGKDVS*KHK	1	1189.61	3	0.18002	47.429	yes
Q00613	Heat shock factor protein 1 (HSF 1) (Heat shock transcription factor 1) (HSTF 1)	YFKHNNMAS*FVR	1	1512.73	3	3.4648	46.844	yes
Q8WTX9	Probable palmitoyltransferase ZDHHC1 (EC 2.3.1.225) (DHHC domain-containing cysteine-rich protein 1) (Zinc finger DHHC domain-containing protein 1) (DHHC-1) (Zinc finger protein 377)	YKMNICNKPS*NK	1	1438.71	3	0.15879	45.433	yes
O75943	Cell cycle checkpoint protein RAD17 (hRad17) (RF-C/activator 1 homolog)	YKPET*QHELAVHK	1	1578.82	3	0.26418	55.724	yes
Q9HAW4	Claspin (hClaspin)	YLADGDLHS*DGPGRMR	1	1758.81	3	3.6229	56.121	yes
P61981	14-3-3 protein gamma (Protein kinase C inhibitor protein 1) (KCIP-1) [Cleaved into: 14-3-3 protein gamma, N-terminally processed]	YLAEVAT*GEKR	1	1235.65	2	1.6511	68.132	yes
O60259	Kallikrein-8 (hK8) (EC 3.4.21.118) (Neuropsin) (NP) (Ovasin) (Serine protease 19) (Serine protease TADG-14) (Tumor-associated differentially expressed gene 14 protein)	YLDWIKKIIGS*K	1	1462.85	3	0.025487	67.252	yes
Q01433	AMP deaminase 2 (EC 3.5.4.6) (AMP deaminase isoform L)	YLQQLAEKPLET*R	1	1587.86	3	2.2004	60.255	yes
Q6N069	N-alpha-acetyltransferase 16, NatA auxiliary subunit (NMDA receptor-regulated 1-like protein) (NARG1-like protein)	YMLRANMIKEAEEMCS*K	1	2045.94	3	0.20946	45.707	yes
Q5TCS8	Adenylate kinase 9 (AK 9) (EC 2.7.4.4) (EC 2.7.4.6) (Adenylate kinase domain-containing protein 1) (Adenylate kinase domain-containing protein 2)	YMQT*YLERIKAGK	1	1599.84	2	1.8635	42.947	yes
Q8N3K9	Cardiomyopathy-associated protein 5 (Dystrobrevin-binding protein 2) (Genethonin-3) (Myospryn) (SPRY domain-containing protein 2) (Tripartite motif-containing protein 76)	YS*VLPDMVDEPK	1	1391.66	3	5.2111	46.844	yes
O75445	Usherin (Usher syndrome type IIa protein) (Usher syndrome type-2A protein)	YT*GLGQK	1	765.402	2	5.0639	51.059	yes
O75694	Nuclear pore complex protein Nup155 (155 kDa nucleoporin) (Nucleoporin Nup155)	YVENPS*QVLNCERRR	1	1861.92	3	4.383	48.532	yes
Q3KR16	Pleckstrin homology domain-containing family G member 6 (PH domain-containing family G member 6) (Myosin-interacting guanine nucleotide exchange factor) (MyoGEF)	AEDMLREIREELAS*QR	1	1944.97	4	2.9806	44.44	yes
P02549	Spectrin alpha chain, erythrocytic 1 (Erythroid alpha-spectrin)	DQARDLAS*AGNLLK	1	1470.78	3	3.3242	51.591	yes
Q5JU85	IQ motif and SEC7 domain-containing protein 2	EEGT*RRGPGCLECR	1	1561.71	3	1.9709	41.367	yes
P78352	Disks large homolog 4 (Postsynaptic density protein 95) (PSD-95) (Synapse-associated protein 90) (SAP-90) (SAP90)	KAFDRAT*K	1	935.519	3	4.8473	46.001	yes
Q13813	Spectrin alpha chain, non-erythrocytic 1 (Alpha-II spectrin) (Fodrin alpha chain) (Spectrin, non-erythroid alpha subunit)	LLEAT*ELKGIKLR	1	1482.91	4	2.7703	44.564	yes
O15020	Spectrin beta chain, non-erythrocytic 2 (Beta-III spectrin) (Spinocerebellar ataxia 5 protein)	LT*ALEEREKER	1	1372.73	4	2.6949	64.313	yes
Q6ZV73	FYVE, RhoGEF and PH domain-containing protein 6 (Zinc finger FYVE domain-containing protein 24)	MLHWT*EQQR	1	1227.58	3	4.5593	52.482	yes
P35609	Alpha-actinin-2 (Alpha-actinin skeletal muscle isoform 2) (F-actin cross-linking protein)	QS*IMAIQNEVEK	1	1388.7	3	4.321	61.167	yes
Q13813	Spectrin alpha chain, non-erythrocytic 1 (Alpha-II spectrin) (Fodrin alpha chain) (Spectrin, non-erythroid alpha subunit)	RAKLNES*HR	1	1109.61	2	2.4333	61.958	yes
P52566	Rho GDP-dissociation inhibitor 2 (Rho GDI 2) (Ly-GDI) (Rho-GDI beta)	T*GVKVDK	1	745.433	3	0.79411	57.281	yes
O95757	Heat shock 70 kDa protein 4L (Heat shock 70-related protein APG-1) (Osmotic stress protein 94)	LNQT*LKK	1	843.518	2	1.2034	78.77	yes
P17480	Nucleolar transcription factor 1 (Autoantigen NOR-90) (Upstream-binding factor 1)(UBF-1)	LPES*PKR	1	825.471	2	5.5754	65.803	yes
Q30201	Hereditary hemochromatosis protein (HLA-H)	MGPRARPALLLLMLLQT*AVLQGR	1	2517.48	3	5.4377	51.566	yes
Q9UKU6	Thyrotropin-releasing hormone-degrading ectoenzyme(TRH-DE)(TRH-degrading ectoenzyme) (Pyroglutamyl-peptidase II)(PAP-II) (TRH-specific aminopeptidase) (Thyroliberinase)	DKWKILNT*R	1	1172.67	3	2.1015	67.385	yes
Q9Y4W6	AFG3-like protein 2 (Paraplegin-like protein)	AS*IFKVHLRPLK	1	1407.87	2	1.7232	55.724	yes
Q99490	Arf-GAP with GTPase, ANK repeat and PH domain-containing protein 2 (AGAP-2) (Centaurin-gamma-1) (Cnt-g1) (GTP-binding and GTPase-activating protein 2) (GGAP2) (Phosphatidylinositol 3-kinase enhancer) (PIKE)	SFGSLRNIYK	1	1183.63	3	2.6318	42.338	yes
O95714	E3 ubiquitin-protein ligase HERC2 (EC 2.3.2.26) (HECT domain and RCC1-like domain-containing protein 2) (HECT-type E3 ubiquitin transferase HERC2)	TKEDVESQNK	1	1176.56	3	2.5611	55.314	yes
Q5VSR9	Sperm protein associated with the nucleus on the X chromosome N1 (Nuclear-associated protein SPAN-Xn1) (SPANX-N1) (SPANX family member N1)	AKKIHSNQLENDQS	1	1610.8	4	0.65731	42.716	yes
Q9UKL3	CASP8-associated protein 2 (FLICE-associated huge protein)	AKSDVSK	1	733.397	3	5.4439	51.787	yes
Q9BSW2	EF-hand calcium-binding domain-containing protein 4B (Calcium release-activated calcium channel regulator 2A) (CRAC channel regulator 2A) (Calcium release-activated channel regulator 2A)	APPRSLGSEGPV	1	1165.61	3	2.1493	49.466	yes
Q86XE0	Sorting nexin-32 (Sorting nexin-6B)	ASTLILR	1	772.481	2	4.8424	46.457	yes
Q9H9Y6	DNA-directed RNA polymerase I subunit RPA2 (RNA polymerase I subunit 2) (EC 2.7.7.6) (DNA-directed RNA polymerase I 135 kDa polypeptide) (RPA135)	ASWERGFAHGSVYK	1	1593.77	4	2.8756	44.998	yes
A6NNE9	E3 ubiquitin-protein ligase MARCH11 (EC 2.3.2.27) (Membrane-associated RING finger protein 11) (Membrane-associated RING-CH protein XI) (MARCH-XI) (RING-type E3 ubiquitin transferase MARCH11)	ATDIEESSR	1	1006.46	4	0.63136	44.753	yes
Q9UL36	Zinc finger protein 236	CDTCEKAFAKPSQLER	1	1824.85	4	3.0137	41.615	yes
Q7Z5M8	Protein ABHD12B (EC 3.-.-.-) (Abhydrolase domain-containing protein 12B) (Alpha/beta hydrolase domain-containing protein 12B)	DFLSKQWS	1	1009.49	3	3.2777	44.349	yes
Q9HBL8	NmrA-like family domain-containing protein 1	DIGVPMTSVR	1	1073.55	2;3	2.3281	50.897	yes
Q7Z5J8	Ankyrin and armadillo repeat-containing protein	DMDHITLSAR	1	1157.55	3	1.019	42.388	yes
Q9Y388	RNA-binding motif protein, X-linked 2	DSEEIDDVTRQLQEK	1	1803.85	4	3.9505	50.897	yes
Q03164	Histone-lysine N-methyltransferase 2A (Lysine N-methyltransferase 2A) (EC 2.1.1.43) (ALL-1) (CXXC-type zinc finger protein 7) (Myeloid/lymphoid or mixed-lineage leukemia) (Myeloid/lymphoid or mixed-lineage leukemia protein 1) (Trithorax-like protein) (Zinc finger protein HRX) [Cleaved into: MLL cleavage product N320 (N-terminal cleavage product of 320 kDa) (p320); MLL cleavage product C180 (C-ter…	DSKSIEK	1	805.418	2	1.8446	64.841	yes
Q7Z6E9	E3 ubiquitin-protein ligase RBBP6 (EC 2.3.2.27) (Proliferation potential-related protein) (Protein P2P-R) (RING-type E3 ubiquitin transferase RBBP6) (Retinoblastoma-binding Q protein 1) (RBQ-1) (Retinoblastoma-binding protein 6) (p53-associated cellular protein of testis)	DSPSRNK	1	802.393	3	2.2922	45.368	yes
Q8WXI2	Connector enhancer of kinase suppressor of ras 2 (Connector enhancer of KSR 2) (CNK homolog protein 2) (CNK2)	DTGKKSK	1	762.424	3	0.62402	62.166	yes
Q9UKV0	Histone deacetylase 9 (HD9) (EC 3.5.1.98) (Histone deacetylase 7B) (HD7) (HD7b) (Histone deacetylase-related protein) (MEF2-interacting transcription repressor MITR)	DTPTNGK	1	731.345	2	3.1332	45.368	yes
Q9HBM1	Kinetochore protein Spc25 (hSpc25)	DTYKDSIKAFAEK	1	1514.76	4	0.8541	40.493	yes
O75746	Calcium-binding mitochondrial carrier protein Aralar1 (Mitochondrial aspartate glutamate carrier 1) (Solute carrier family 25 member 12)	DVEVTKEEFAQSAIR	1	1720.86	4	0.39794	51.643	yes
Q2TAC2	Coiled-coil domain-containing protein 57	EAGAKAAESLQRAEATNAELER	1	2314.15	4	4.3949	40.625	yes
Q86YE8	Zinc finger protein 573	ECKKTFTLYR	1	1287.66	4	3.3111	41.399	yes
Q9UPQ4	Tripartite motif-containing protein 35 (Hemopoietic lineage switch protein 5)	EDDVSFLMKHKSR	1	1590.78	3	3.7422	42.58	yes
Q9ULJ8	Neurabin-1 (Neurabin-I) (Neural tissue-specific F-actin-binding protein I) (Protein phosphatase 1 regulatory subunit 9A)	EGEGSQQSRGRK	1	1317.64	4	0.59288	47.712	yes
Q9NPJ6	Mediator of RNA polymerase II transcription subunit 4 (Activator-recruited cofactor 36 kDa component) (ARC36) (Mediator complex subunit 4) (TRAP/SMCC/PC2 subunit p36 subunit) (Vitamin D3 receptor-interacting protein complex 36 kDa component) (DRIP36)	EKERLGGGLGVAGGNSTR	1	1756.92	4	0.66113	40.493	yes
P05423	DNA-directed RNA polymerase III subunit RPC4 (RNA polymerase III subunit C4) (DNA-directed RNA polymerase III subunit D) (Protein BN51) (RNA polymerase III 47 kDa subunit) (RPC53 homolog)	EKRETDEETK	1	1263.59	4	0.31335	56.916	yes
O14795	Protein unc-13 homolog B (Munc13-2) (munc13)	ELSHLSKLKDHMVR	1	1691.91	3	3.3392	51.726	yes
Q9H694	Protein bicaudal C homolog 1 (Bic-C)	EMIMSVLDTK	1	1165.57	3	0.19881	51.276	yes
Q9NY74	Ewing's tumor-associated antigen 1 (Ewing's tumor-associated antigen 16)	EPETSNK	1	803.366	2	0.54433	53.775	yes
Q13111	Chromatin assembly factor 1 subunit A (CAF-1 subunit A) (Chromatin assembly factor I p150 subunit) (CAF-I 150 kDa subunit) (CAF-I p150) (hp150)	EQDSWSEAGGILFK	1	1565.74	4	1.853	40.475	yes
P0CG12	Chromosome transmission fidelity protein 8 homolog isoform 2 (Decreased expression in renal and prostate cancer protein)	ERPTPWTR	1	1041.54	3	3.8636	40.373	yes
Q5T4S7	E3 ubiquitin-protein ligase UBR4 (EC 2.3.2.27) (600 kDa retinoblastoma protein-associated factor) (N-recognin-4) (RING-type E3 ubiquitin transferase UBR4) (Retinoblastoma-associated factor of 600 kDa) (RBAF600) (p600) (Zinc finger UBR1-type protein 1)	ESAFQSEPR	1	1049.48	3	1.2762	42.475	yes
O60264	SWI/SNF-related matrix-associated actin-dependent regulator of chromatin subfamily A member 5 (SWI/SNF-related matrix-associated actin-dependent regulator of chromatin A5) (EC 3.6.4.-) (Sucrose nonfermenting protein 2 homolog) (hSNF2H)	ESEITDEDIDGILERGAKK	1	2117.05	4	5.0329	45.618	yes
P16435	NADPH--cytochrome P450 reductase (CPR) (P450R) (EC 1.6.2.4)	ESSFVEK	1	824.392	4	1.6825	51.276	yes
Q92769	Histone deacetylase 2 (HD2) (EC 3.5.1.98)	ETEDKKTDVK	1	1191.6	3	1.1798	55.196	yes
Q7L2R6	Zinc finger protein 765	EVFHAGTSQR	1	1130.55	4	4.4867	50.222	yes
Q8WZ42	Titin (EC 2.7.11.1) (Connectin) (Rhabdomyosarcoma antigen MU-RMS-40.14)	FEISKLTEHQEYK	1	1650.83	3	2.4977	55.261	yes
P0C1S8	Wee1-like protein kinase 2 (EC 2.7.10.2) (Wee1-like protein kinase 1B) (Wee1B kinase)	FKTATLER	1	964.534	3	1.9714	48.998	yes
Q8IX01	SURP and G-patch domain-containing protein 2 (Arginine/serine-rich-splicing factor 14) (Splicing factor, arginine/serine-rich 14)	FLKHSALKTPR	1	1296.77	4	3.6532	43.419	yes
P57059	Serine/threonine-protein kinase SIK1 (EC 2.7.11.1) (Salt-inducible kinase 1) (SIK-1) (Serine/threonine-protein kinase SNF1-like kinase 1) (Serine/threonine-protein kinase SNF1LK)	FRIPFFMSQDCESLIR	1	1987.96	4	5.2262	43.476	yes
Q13427	Peptidyl-prolyl cis-trans isomerase G (PPIase G) (Peptidyl-prolyl isomerase G) (EC 5.2.1.8) (CASP10) (Clk-associating RS-cyclophilin) (CARS-Cyp) (CARS-cyclophilin) (SR-cyclophilin) (SR-cyp) (SRcyp) (Cyclophilin G) (Rotamase G)	FRRSETPPHWR	1	1467.75	4	2.9337	44.511	yes
Q9BZE2	tRNA pseudouridine(38/39) synthase (EC 5.4.99.45) (tRNA pseudouridine synthase 3) (tRNA pseudouridylate synthase 3) (tRNA-uridine isomerase 3)	FSCLERTYR	1	1173.56	3	4.0223	41.876	yes
P49189	4-trimethylaminobutyraldehyde dehydrogenase (TMABADH) (EC 1.2.1.47) (Aldehyde dehydrogenase E3 isozyme) (Aldehyde dehydrogenase family 9 member A1) (EC 1.2.1.3) (Gamma-aminobutyraldehyde dehydrogenase) (EC 1.2.1.19) (R-aminobutyraldehyde dehydrogenase) [Cleaved into: 4-trimethylaminobutyraldehyde dehydrogenase, N-terminally processed]	FTEEVVKQTQR	1	1363.71	3	2.0309	57.414	yes
Q96LU7	Myelin regulatory factor-like protein	FTLGNICFHSK	1	1265.62	4	5.1139	50.305	yes
Q9Y2T3	Guanine deaminase (Guanase) (Guanine aminase) (EC 3.5.4.3) (Guanine aminohydrolase) (GAH) (p51-nedasin)	FVSEMLQKNYSR	1	1500.74	4	5.8162	45.829	yes
Q04637	Eukaryotic translation initiation factor 4 gamma 1 (eIF-4-gamma 1) (eIF-4G 1) (eIF-4G1) (p220)	GEEDADGSKTQDLFRR	1	1822.84	3	5.2742	48.616	yes
Q96BK5	PIN2/TERF1-interacting telomerase inhibitor 1 (Liver-related putative tumor suppressor) (Pin2-interacting protein X1) (Protein 67-11-3) (TRF1-interacting protein 1)	GKDLSSR	1	761.403	3	2.7486	43.308	yes
Q9H329	Band 4.1-like protein 4B (FERM-containing protein CG1) (Protein EHM2)	GKSPAQAELSYLNKAK	1	1703.92	3	2.4181	52.5	yes
Q9NTU4	Cation channel sperm-associated protein subunit zeta (CatSper-zeta) (CatSperzeta) (Testis-expressed protein 40)	GSSMEINLGEK	1	1163.55	3	5.0904	42.031	yes
Q9H5L6	DNA transposase THAP9 (EC 2.7.7.-) (THAP domain-containing protein 9) (hTh9)	HHSERTDMK	1	1139.51	2;3	0.68653	68.371	yes
P52747	Zinc finger protein 143 (SPH-binding factor) (Selenocysteine tRNA gene transcription-activating factor) (hStaf)	HIRTHTGERPFK	1	1477.79	3	1.7121	42.682	yes
Q96LZ7	Regulator of microtubule dynamics protein 2 (RMD-2) (hRMD-2) (Protein FAM82A1)	HYANIGKTLSER	1	1387.72	3	3.2292	46.89	yes
P22079	Lactoperoxidase (LPO) (EC 1.11.1.7) (Salivary peroxidase) (SPO)	ISNVFTFAFR	1	1200.63	3	1.3583	68.557	yes
Q96ES7	SAGA-associated factor 29 (Coiled-coil domain-containing protein 101) (SAGA complex-associated factor 29)	ISPYYRTK	1	1026.55	3	1.7676	60.118	yes
O94898	Leucine-rich repeats and immunoglobulin-like domains protein 2 (LIG-2)	IVEGLTFQGLDSLR	1	1546.84	4	2.6294	69.422	yes
Q8IV42	L-seryl-tRNA(Sec) kinase (EC 2.7.1.164) (O-phosphoseryl-tRNA(Sec) kinase)	IVSQTMKEAK	1	1133.61	3	3.0903	57.106	yes
Q8N3K9	Cardiomyopathy-associated protein 5 (Dystrobrevin-binding protein 2) (Genethonin-3) (Myospryn) (SPRY domain-containing protein 2) (Tripartite motif-containing protein 76)	KAPITEDVRVATQK	1	1554.87	3	0.47973	44.193	yes
Q9Y4W6	AFG3-like protein 2 (EC 3.4.24.-) (Paraplegin-like protein)	KDDSHWWSR	1	1215.54	2	0.33717	62.463	yes
Q12888	TP53-binding protein 1 (53BP1) (p53-binding protein 1) (p53BP1)	KESGELYYSIEK	1	1444.71	3;4	3.1344	42.031	yes
Q8TDD2	Transcription factor Sp7 (Zinc finger protein osterix)	KFTCLLCSKR	1	1197.64	3	1.2465	52.49	yes
P62072	Mitochondrial import inner membrane translocase subunit Tim10	KLTELSMQDEELMKR	1	1849.93	4	0.20252	59.227	yes
Q99728	BRCA1-associated RING domain protein 1 (BARD-1) (EC 2.3.2.27) (RING-type E3 ubiquitin transferase BARD1)	KNSIKMWFSPR	1	1392.73	3	3.3273	51.286	yes
Q8NFT6	Protein DBF4 homolog B (Activator of S phase kinase-like protein 1) (ASK-like protein 1) (Chiffon homolog B) (Dbf4-related factor 1)	KPEGTCPAAESR	1	1244.58	4	3.0742	44.391	yes
Q5T890	DNA excision repair protein ERCC-6-like 2 (EC 3.6.4.-) (DNA repair and recombination protein RAD26-like)	KRASSLR	1	816.493	3	5.3317	66.19	yes
Q15424	Scaffold attachment factor B1 (SAF-B) (SAF-B1) (HSP27 estrogen response element-TATA box-binding protein) (HSP27 ERE-TATA-binding protein)	KSASREK	1	804.445	3	1.3483	60.598	yes
P30260	Cell division cycle protein 27 homolog (Anaphase-promoting complex subunit 3) (APC3) (CDC27 homolog) (CDC27Hs) (H-NUC)	KSEKALDTLNK	1	1245.69	4	0.62828	44.734	yes
P33241	Lymphocyte-specific protein 1 (47 kDa actin-binding protein) (52 kDa phosphoprotein) (pp52) (Lymphocyte-specific antigen WP34)	KSLWEQKGGSK	1	1246.67	3	1.2012	44.847	yes
Q8N3Z0	Inactive serine protease 35	KYMELGISPTIKK	1	1506.85	4	3.9593	41.383	yes
Q9BRQ0	Pygopus homolog 2	LEGGGGPAPPPAPPSTGRKQGK	1	2055.09	4	1.9564	40.952	yes
Q00597	Fanconi anemia group C protein (Protein FACC)	LGIESPRSEK	1	1114.6	3	3.4798	40.496	yes
Q14680	Maternal embryonic leucine zipper kinase (hMELK) (EC 2.7.11.1) (Protein kinase Eg3) (pEg3 kinase) (Protein kinase PK38) (hPK38) (Tyrosine-protein kinase MELK) (EC 2.7.10.2)	LSEEETR	1	862.403	3	2.3678	43.77	yes
Q9P286	Serine/threonine-protein kinase PAK 5 (EC 2.7.11.1) (p21-activated kinase 5) (PAK-5) (p21-activated kinase 7) (PAK-7)	LSEPTMCIPK	1	1117.55	3	0.69193	62.162	yes
Q09666	Neuroblast differentiation-associated protein AHNAK (Desmoyokin)	LSGPSLK	1	700.412	3	5.0562	49.358	yes
Q6UB98	Ankyrin repeat domain-containing protein 12 (Ankyrin repeat-containing cofactor 2) (GAC-1 protein)	LVNDDLMQTSFER	1	1566.73	4	3.0736	50.354	yes
Q15398	Disks large-associated protein 5 (DAP-5) (Discs large homolog 7) (Disks large-associated protein DLG7) (Hepatoma up-regulated protein) (HURP)	MENLPEINTAKIK	1	1499.8	4	1.4496	60.549	yes
Q8N1F1	Putative uncharacterized protein LRRC75A-AS1, mitochondrial (FAM211A antisense RNA 1) (LRRC75A antisense RNA 1) (Putative uncharacterized protein FAM211A-AS1, mitochondrial)	MFPGSLSR	1	893.443	3	2.9022	51.276	yes
Q6NYC1	Bifunctional arginine demethylase and lysyl-hydroxylase JMJD6 (EC 1.14.11.-) (Histone arginine demethylase JMJD6) (JmjC domain-containing protein 6) (Jumonji domain-containing protein 6) (Lysyl-hydroxylase JMJD6) (Peptide-lysine 5-dioxygenase JMJD6) (Phosphatidylserine receptor) (Protein PTDSR)	MKYYIEYMESTR	1	1612.73	3	4.5531	40.616	yes
P52564	Dual specificity mitogen-activated protein kinase kinase 6 (MAP kinase kinase 6) (MAPKK 6) (EC 2.7.12.2) (MAPK/ERK kinase 6) (MEK 6) (Stress-activated protein kinase kinase 3) (SAPK kinase 3) (SAPKK-3) (SAPKK3)	MSQSKGK	1	764.385	3	4.0716	47.187	yes
A6QL63	Ankyrin repeat and BTB/POZ domain-containing protein BTBD11 (BTB/POZ domain-containing protein 11)	NASGVLCLPDSLNLHR	1	1707.87	3	0.49236	40.477	yes
Q9Y6Y0	Influenza virus NS1A-binding protein (NS1-BP) (NS1-binding protein) (Aryl hydrocarbon receptor-associated protein 3)	NEWKMMGNMTSPR	1	1580.69	3	4.5253	40.475	yes
Q14289	Protein-tyrosine kinase 2-beta (EC 2.7.10.2) (Calcium-dependent tyrosine kinase) (CADTK) (Calcium-regulated non-receptor proline-rich tyrosine kinase) (Cell adhesion kinase beta) (CAK-beta) (CAKB) (Focal adhesion kinase 2) (FADK 2) (Proline-rich tyrosine kinase 2) (Related adhesion focal tyrosine kinase) (RAFTK)	NFKLVKCTVQTEIR	1	1677.92	4	1.432	43.794	yes
Q96ED9	Protein Hook homolog 2 (h-hook2) (hHK2)	NLEEKYESVTKEK	1	1595.8	3	2.8218	49.066	yes
P13056	Nuclear receptor subfamily 2 group C member 1 (Orphan nuclear receptor TR2) (Testicular receptor 2)	NLVYSCRGSKDCIINK	1	1811.9	4	1.322	46.797	yes
Q8IVL1	Neuron navigator 2 (EC 3.6.4.12) (Helicase APC down-regulated 1) (Pore membrane and/or filament-interacting-like protein 2) (Retinoic acid inducible in neuroblastoma 1) (Steerin-2) (Unc-53 homolog 2) (unc53H2)	NSLWSGDDVK	1	1119.52	3	2.3269	42.317	yes
P78545	ETS-related transcription factor Elf-3 (E74-like factor 3) (Epithelial-restricted with serine box) (Epithelium-restricted Ets protein ESX) (Epithelium-specific Ets transcription factor 1) (ESE-1)	NSNMTYEK	1	985.418	2	4.1561	54.157	yes
Q9P260	LisH domain and HEAT repeat-containing protein KIAA1468	NYKSSPEIQEPIKPLEK	1	1999.06	3	2.7134	47.639	yes
P36776	Lon protease homolog, mitochondrial (EC 3.4.21.53) (LONHs) (Lon protease-like protein) (LONP) (Mitochondrial ATP-dependent protease Lon) (Serine protease 15)	NYLDWLTSIPWGK	1	1591.8	4	2.0451	42.031	yes
Q86VI3	Ras GTPase-activating-like protein IQGAP3	QACTAQTPEPLRRHR	1	1762.9	4	1.9206	52.576	yes
Q68CZ2	Tensin-3 (Tensin-like SH2 domain-containing protein 1) (Tumor endothelial marker 6)	QGSSAEQPLGGR	1	1185.57	3	1.945	43.305	yes
Q6ZU52	Uncharacterized protein KIAA0408	QMQGHLSPRSYR	1	1458.71	3	4.5806	42.843	yes
Q8WZ42	Titin (EC 2.7.11.1) (Connectin) (Rhabdomyosarcoma antigen MU-RMS-40.14)	QPIETERSK	1	1086.57	2	0.76982	99.442	yes
P85037	Forkhead box protein K1 (Myocyte nuclear factor) (MNF)	QPSVTIGR	1	856.477	3	3.8779	47.574	yes
Q12955	Ankyrin-3 (ANK-3) (Ankyrin-G)	QSFASLALRKR	1	1275.74	4	0.53318	46.819	yes
Q9P2N5	RNA-binding protein 27 (RNA-binding motif protein 27)	RAMSGLEGPLTKKPWLGK	1	1968.1	5	0.31724	49.595	yes
Q0VF49	Uncharacterized protein KIAA2012	RCEDPSKALLTK	1	1359.72	4	1.2101	52.019	yes
Q494X3	Zinc finger protein 404	RIHSSEKLYDCK	1	1477.73	3	5.822	53.567	yes
Q13523	Serine/threonine-protein kinase PRP4 homolog (EC 2.7.11.1) (PRP4 kinase) (PRP4 pre-mRNA-processing factor 4 homolog)	RRLSSPR	1	870.515	3	3.9362	50.805	yes
Q8IXQ4	GPALPP motifs-containing protein 1 (Lipopolysaccharide-specific response protein 7)	RSESLMDIHHKK	1	1479.76	3	0.37417	45.433	yes
Q9Y613	FH1/FH2 domain-containing protein 1 (Formin homolog overexpressed in spleen 1) (FHOS) (Formin homology 2 domain-containing protein 1)	RSLFSLK	1	849.507	3	2.9786	44.863	yes
Q93034	Cullin-5 (CUL-5) (Vasopressin-activated calcium-mobilizing receptor 1) (VACM-1)	RTLWSLVAFPK	1	1316.76	3	3.6316	40.496	yes
Q13427	Peptidyl-prolyl cis-trans isomerase G (PPIase G) (Peptidyl-prolyl isomerase G) (EC 5.2.1.8) (CASP10) (Clk-associating RS-cyclophilin) (CARS-Cyp) (CARS-cyclophilin) (SR-cyclophilin) (SR-cyp) (SRcyp) (Cyclophilin G) (Rotamase G)	RTPPGRSR	1	925.521	3	4.1545	47.574	yes
Q14CM0	FERM and PDZ domain-containing protein 4 (PDZ domain-containing protein 10) (PSD-95-interacting regulator of spine morphogenesis) (Preso)	SAFISAAKKAR	1	1148.67	4	4.459	58.699	yes
Q96KF2	Small nuclear protein PRAC1 (Prostate cancer susceptibility candidate protein 1) (Prostate, rectum and colon expressed gene protein)	SAFLSNKK	1	893.497	3	3.9472	45.764	yes
A6NCS4	Homeobox protein Nkx-2.6 (Homeobox protein NK-2 homolog F)	SCPAASPHPR	1	1021.48	4	1.7133	41.996	yes
P46019	Phosphorylase b kinase regulatory subunit alpha, liver isoform (Phosphorylase kinase alpha L subunit)	SEMKQMTRR	1	1165.57	3	5.6656	41.227	yes
Q96L91	E1A-binding protein p400 (EC 3.6.4.-) (CAG repeat protein 32) (Domino homolog) (hDomino) (Trinucleotide repeat-containing gene 12 protein) (p400 kDa SWI2/SNF2-related protein)	SEVINDEVKVVTGK	1	1515.81	3	3.8094	40.432	yes
P50991	T-complex protein 1 subunit delta (TCP-1-delta) (CCT-delta) (Stimulator of TAR RNA-binding)	SGATAGAAGGRGK	1	1059.54	3	0.98312	42.976	yes
Q9H8Y5	Ankyrin repeat and zinc finger domain-containing protein 1 (Zinc finger protein 744)	SGRSLFFGGK	1	1054.56	3	0.4838	48.981	yes
Q8WVR3	Uncharacterized protein C7orf43	SGSVMERR	1	920.45	3	1.7077	42.083	yes
A6NFH5	Fatty acid-binding protein 12	SIFKNNEISFK	1	1325.7	3	5.0877	46.318	yes
P52746	Zinc finger protein 142 (HA4654)	SKLKTHLLR	1	1094.69	3	3.3548	46.129	yes
Q13427	Peptidyl-prolyl cis-trans isomerase G (PPIase G) (Peptidyl-prolyl isomerase G) (EC 5.2.1.8) (CASP10) (Clk-associating RS-cyclophilin) (CARS-Cyp) (CARS-cyclophilin) (SR-cyclophilin) (SR-cyp) (SRcyp) (Cyclophilin G) (Rotamase G)	SKQLESK	1	818.45	2	2.1207	77.318	yes
P30304	M-phase inducer phosphatase 1 (EC 3.1.3.48) (Dual specificity phosphatase Cdc25A)	SKREMYSR	1	1055.52	3	0.69688	50.46	yes
Q96J77	Tumor protein D55 (hD55) (Testis development protein NYD-SP25) (Tumor protein D52-like 3)	SKVSGGK	1	661.376	4	1.5569	56.122	yes
Q96IT1	Zinc finger protein 496 (Zinc finger protein with KRAB and SCAN domains 17)	SLPASHR	1	766.409	3	1.2717	43.124	yes
Q9C019	Tripartite motif-containing protein 15 (RING finger protein 93) (Zinc finger protein 178) (Zinc finger protein B7)	SLPDSPLR	1	883.476	3	2.3658	55.37	yes
Q86UT8	Coiled-coil domain-containing protein 84	SMVKGLDSYEEKEDK	1	1756.82	4	2.2088	43.761	yes
P40855	Peroxisomal biogenesis factor 19 (33 kDa housekeeping protein) (Peroxin-19) (Peroxisomal farnesylated protein)	SPGDTAK	1	674.324	3	2.4369	41.164	yes
O94913	Pre-mRNA cleavage complex 2 protein Pcf11 (Pre-mRNA cleavage complex II protein Pcf11)	SPIIHSPK	1	877.502	3	1.5748	53.968	yes
Q96FZ2	Embryonic stem cell-specific 5-hydroxymethylcytosine-binding protein (ES cell-specific 5hmC-binding protein) (Putative peptidase SRAPD1) (EC 3.4.-.-) (SRAP domain-containing protein 1)	SPKKEDSK	1	917.482	3	1.7777	42.287	yes
Q9BRL6	Serine/arginine-rich splicing factor 8 (Pre-mRNA-splicing factor SRP46) (Splicing factor SRp46) (Splicing factor, arginine/serine-rich 2B)	SPPRVSK	1	769.445	4	0.77252	60.682	yes
Q7L0X2	Glutamate-rich protein 6 (Protein FAM194A)	SPSGFGDPGKK	1	1075.53	3	5.4383	50.791	yes
Q9Y4W6	AFG3-like protein 2 (EC 3.4.24.-) (Paraplegin-like protein)	SSGGGGGGGGKR	1	932.442	3	5.0213	45.54	yes
O00566	U3 small nucleolar ribonucleoprotein protein MPP10 (M phase phosphoprotein 10)	SSVDQAGK	1	790.382	2	3.8503	77.192	yes
O94885	SAM and SH3 domain-containing protein 1 (Proline-glutamate repeat-containing protein)	SVKETMRK	1	977.533	3	4.6374	43.083	yes
Q92859	Neogenin (Immunoglobulin superfamily DCC subclass member 2)	SVNGSHK	1	727.361	3	3.1445	46.352	yes
Q8IVF6	Ankyrin repeat domain-containing protein 18A	SVRLNEKMITK	1	1317.74	3	4.4326	57.174	yes
Q9C0D5	Protein TANC1 (Tetratricopeptide repeat, ankyrin repeat and coiled-coil domain-containing protein 1)	SYEAFYARARAK	1	1431.73	2	1.1169	44.847	yes
Q8N5G2	Macoilin (Macoilin-1) (Transmembrane protein 57)	SYVSYKMR	1	1032.51	3	0.99028	42.287	yes
Q96LB3	Intraflagellar transport protein 74 homolog (Capillary morphogenesis gene 1 protein) (CMG-1) (Coiled-coil domain-containing protein 2)	SYYLGLLRSK	1	1198.67	4	0.038832	52.5	yes
Q16644	MAP kinase-activated protein kinase 3 (MAPK-activated protein kinase 3) (MAPKAP kinase 3) (MAPKAP-K3) (MAPKAPK-3) (MK-3) (EC 2.7.11.1) (Chromosome 3p kinase) (3pK)	TGQKCALKLLYDSPK	1	1663.9	3	5.6279	41.292	yes
Q96L16	Deleted.	THDPGISR	1	881.436	4	3.7296	46.955	yes
Q8IXT5	RNA-binding protein 12B (RNA-binding motif protein 12B)	TIEMKRTDR	1	1148.6	3	3.5471	58.04	yes
O75592	E3 ubiquitin-protein ligase MYCBP2 (EC 2.3.2.27) (Myc-binding protein 2) (Pam/highwire/rpm-1 protein) (Protein associated with Myc) (RING-type E3 ubiquitin transferase MYCBP2)	TKTHQRQVFK	1	1271.71	5	5.7438	42.785	yes
Q8N616	Putative uncharacterized protein encoded by LINC00311	TLFWSEWAR	1	1194.58	3	3.635	56.205	yes
Q7Z4L5	Tetratricopeptide repeat protein 21B (TPR repeat protein 21B) (Intraflagellar transport 139 homolog)	TLHMAMSLPGMK	1	1315.65	3	3.0917	56.514	yes
Q06546	GA-binding protein alpha chain (GABP subunit alpha) (Nuclear respiratory factor 2 subunit alpha) (Transcription factor E4TF1-60)	TLIGYSAAELNR	1	1306.69	3	0.034074	45.829	yes
Q6X4W1	NMDA receptor synaptonuclear signaling and neuronal migration factor (Nasal embryonic luteinizing hormone-releasing hormone factor) (Nasal embryonic LHRH factor)	TLMTPYR	1	880.448	3	4.6292	46.426	yes
Q7L099	Protein RUFY3 (RUN and FYVE domain-containing protein 3) (Rap2-interacting protein x) (RIPx) (Single axon-regulated protein) (Singar)	TLNSAANK	1	817.429	2	0.55825	52.391	yes
Q8NFZ0	F-box DNA helicase 1 (hFBH1) (EC 3.6.4.12) (F-box only protein 18)	TLVGGNHQSGIRGDAK	1	1608.83	3	2.7052	45.614	yes
Q5T2T1	MAGUK p55 subfamily member 7	TNKSMYECKK	1	1230.57	3	1.1081	43.308	yes
Q96E11	Ribosome-recycling factor, mitochondrial (RRF) (Ribosome-releasing factor, mitochondrial)	TNSMNKLKK	1	1062.59	4	1.7089	56.205	yes
A8MUU9	Putative uncharacterized protein ENSP00000383309	TPPRASLK	1	868.513	4	4.5823	41.383	yes
P40818	Ubiquitin carboxyl-terminal hydrolase 8 (EC 3.4.19.12) (Deubiquitinating enzyme 8) (Ubiquitin isopeptidase Y) (hUBPy) (Ubiquitin thioesterase 8) (Ubiquitin-specific-processing protease 8)	TQKSNGEKNEK	1	1261.63	3	2.2286	40.496	yes
Q9UQB3	Catenin delta-2 (Delta-catenin) (GT24) (Neural plakophilin-related ARM-repeat protein) (NPRAP) (Neurojungin)	TTDLEIR	1	846.445	3	2.0005	47.228	yes
P49790	Nuclear pore complex protein Nup153 (153 kDa nucleoporin) (Nucleoporin Nup153)	TTYGGAAAAVR	1	1036.53	2	4.938	40.496	yes
O75151	Lysine-specific demethylase PHF2 (EC 1.14.11.-) (GRC5) (PHD finger protein 2)	TVKMPKPSK	1	1014.59	3	4.4139	52.579	yes
Q8IY37	Probable ATP-dependent RNA helicase DHX37 (EC 3.6.4.13) (DEAH box protein 37)	TWAGQGASLK	1	1017.52	3	5.8487	55.721	yes
Q02252	Methylmalonate-semialdehyde dehydrogenase [acylating], mitochondrial (MMSDH) (Malonate-semialdehyde dehydrogenase [acylating]) (EC 1.2.1.18) (EC 1.2.1.27) (Aldehyde dehydrogenase family 6 member A1)	VCNLIDSGTK	1	1048.52	3	5.8167	48.568	yes
O76054	SEC14-like protein 2 (Alpha-tocopherol-associated protein) (TAP) (hTAP) (Squalene transfer protein) (Supernatant protein factor) (SPF)	VETITIIYDCEGLGLK	1	1765.92	3	1.3401	43.548	yes
Q9NSI6	Bromodomain and WD repeat-containing protein 1 (WD repeat-containing protein 9)	VIHDSQETAEKEVK	1	1611.81	3	0.22191	49.448	yes
Q15058	Kinesin-like protein KIF14	VISALSEQANQR	1	1314.69	4	3.2323	59.418	yes
Q9NQV7	Histone-lysine N-methyltransferase PRDM9 (EC 2.1.1.43) (PR domain zinc finger protein 9) (PR domain-containing protein 9)	VNPGNTGKLFVGVGISR	1	1713.95	4	0.40546	44.312	yes
P26038	Moesin (Membrane-organizing extension spike protein)	VQKHLKALTSELANAR	1	1778.02	4	1.2296	40.941	yes
Q5VYK3	Proteasome-associated protein ECM29 homolog (Ecm29)	VRESSCLALNDLLR	1	1587.84	4	1.349	41.825	yes
Q96RD6	Pannexin-2	VSCKLPSVQLQR	1	1356.75	4	4.6171	45.829	yes
Q8N4P6	Leucine-rich repeat-containing protein 71	VTIPEQKPSR	1	1153.65	2	2.331	94.309	yes
Q12929	Epidermal growth factor receptor kinase substrate 8	VYSQITVQK	1	1064.59	3	0.88295	44.753	yes
O00423	Echinoderm microtubule-associated protein-like 1 (EMAP-1) (HuEMAP-1)	WFVFDTETK	1	1171.56	4	5.7821	47.991	yes
H3BN30	Uncharacterized protein C16orf97	WKSRLFPRPPNWLSGK	1	1968.08	5	3.4282	44.44	yes
Q96B01	RAD51-associated protein 1 (RAD51-interacting protein)	WVPPAASGGSR	1	1083.55	3	0.10543	50.034	yes
Q9UBU9	Nuclear RNA export factor 1 (Tip-associated protein) (Tip-associating protein) (mRNA export factor TAP)	YDKAWLLSMIQSK	1	1581.82	3	0.24393	40.475	yes
Q96NG8	Zinc finger protein 582	YGSRLIQHENIHSGK	1	1737.89	3	4.3482	40.158	yes
O95251	Histone acetyltransferase KAT7 (EC 2.3.1.48) (Histone acetyltransferase binding to ORC1) (Lysine acetyltransferase 7) (MOZ, YBF2/SAS3, SAS2 and TIP60 protein 2) (MYST-2)	YLHNFQGKEISIK	1	1575.84	3	3.7887	62.035	yes
Q02575	Helix-loop-helix protein 1 (HEN-1) (Class A basic helix-loop-helix protein 35) (bHLHa35) (Nescient helix loop helix 1) (NSCL-1)	YRTAHATR	1	974.505	3	2.653	41.164	yes
A6NHR8	Putative protein FAM47D	YTSRKMHDFK	1	1311.64	4	4.0022	43.897	yes
Q13813	Spectrin alpha chain, non-erythrocytic 1 (Alpha-II spectrin) (Fodrin alpha chain) (Spectrin, non-erythroid alpha subunit)	FKELSTLR	1	992.565	4	1.8539	40.727	yes
Q92834	X-linked retinitis pigmentosa GTPase regulator	TPQLVSEIPEK	1	1239.67	4	3.9131	47.971	yes
A6PVC2	Protein monoglycylase TTLL8 (Tubulin--tyrosine ligase-like protein 8)	NSFELYGADFVLGR	1	1586.77	3	0.39976	59.227	yes
A8MVM7	Putative uncharacterized protein ENSP00000382790	MKIAYKDTPR	1	1221.65	2	1.5681	69.03	yes
O75147	Obscurin-like protein 1	DGQKVEESELLVVK	1	1571.84	3	1.3163	53.565	yes
P10243	Myb-related protein A(A-Myb) (Myb-like protein 1)	DGSLNDGGNMALK	1	1290.59	3	0.15395	62.357	yes
P22626	Heterogeneous nuclear ribonucleoproteins A2/B1(hnRNP A2/B1)	LTDCVVMRDPASK	1	1433.7	3	0.37475	43.794	yes
P42568	Protein AF-9 (ALL1-fused gene from chromosome 9 protein) (Myeloid/lymphoid or mixed-lineage leukemia translocated to chromosome 3 protein) (YEATS domain-containing protein 3)	SAFKEPSR	1	920.472	3	1.6623	44.614	yes
P49802	Regulator of G-protein signaling 7(RGS7)	LMKSDSYPR	1	1095.54	4	1.6155	49.418	yes
P57103	Sodium/calcium exchanger 3 (Na(+)/Ca(2+)-exchange protein 3) (Solute carrier family 8 member 30)	GGDMSKTMYVDYK	1	1493.65	3	0.51265	43.68	yes
P78527	DNA-dependent protein kinase catalytic subunit(DNA-PK catalytic subunit)(DNA-PKcs)	MKMIDSARK	1	1078.56	2	0.56938	42.19	yes
Q09666	Neuroblast differentiation-associated protein AHNAK (Desmoyokin)	MPKFNFSKPK	1	1222.65	3	0.19725	53.557	yes
Q13501	Sequestosome-1 (EBI3-associated protein of 60 kDa)(EBIAP)(p60) (Phosphotyrosine-independent ligand for the Lck SH2 domain of 62 kDa) (Ubiquitin-binding protein p62)	GLHRGHTK	1	904.499	2	3.1297	48.561	yes
Q14C86	GTPase-activating protein and VPS9 domain-containing protein 1 (GAPex-5) (Rab5-activating protein 6)	NLMAQLQETMR	1	1333.65	3	3.7261	63.624	yes
Q15036	Sorting nexin-17	SGGSIRKMLR	1	1103.62	3	0.94065	47.187	yes
Q5KSL6	Diacylglycerol kinase kappa(DAG kinase kappa) (142 kDa diacylglycerol kinase) (Diglyceride kinase kappa)(DGK-kappa)	SGDHQGIVFLRK	1	1355.73	4	0.82613	51.727	yes
Q66GS9	Centrosomal protein of 135 kDa(Cep135) (Centrosomal protein 4)	SIAFRRQR	1	1032.59	2	0.22051	52.716	yes
Q6P3R8	Serine/threonine-protein kinase Nek5 (Never in mitosis A-related kinase 5)(NimA-related protein kinase 5)	ESKNPEQKYK	1	1249.63	5	0.5975	60.398	yes
Q86VX9	Vacuolar fusion protein MON1 homolog A	ATDMQRKR	1	1004.52	3	0.29644	57.281	yes
Q8N815	Cyclin N-terminal domain-containing protein 1	SVSYQAVEILERFMVKQAENICR	1	2712.37	5	2.8436	42.639	yes
Q8NEZ4	Histone-lysine N-methyltransferase 2C(Lysine N-methyltransferase 2C) (Homologous to ALR protein) (Myeloid/lymphoid or mixed-lineage leukemia protein 3)	MQNSAPRKQR	1	1214.63	4	0.31651	58.132	yes
Q8NI35	InaD-like protein(Inadl protein)(hINADL) (Pals1-associated tight junction protein) (Protein associated to tight junctions)	IDTLKNDNIQALEK	1	1613.86	3	0.16564	42.785	yes
Q8TEU7	Rap guanine nucleotide exchange factor 6 (PDZ domain-containing guanine nucleotide exchange factor 2)(PDZ-GEF2) (RA-GEF-2)	GSMVLPPCSFGK	1	1221.59	3	1.0091	51.771	yes
Q99490	Arf-GAP with GTPase, ANK repeat and PH domain-containing protein 2(AGAP-2) (Centaurin-gamma-1)( Cnt-g1) (GTP-binding and GTPase-activating protein 2)(GGAP2) (Phosphatidylinositol 3-kinase enhancer)(PIKE)	SRGAGALQR	1	914.505	2	5.498	74.464	yes
Q9C0E4	Glutamate receptor-interacting protein 2( GRIP-2)	GSPPPTEPRR	1	1092.57	3	0.14193	52.5	yes
Q9NZM3	Intersectin-2 (SH3 domain-containing protein 1B) (SH3P18）（SH3P18-like WASP-associated protein）	NTSGWWQGELQAR	1	1531.72	3	1.9902	50.222	yes
Q9P286	Serine/threonine-protein kinase PAK 7 (p21-activated kinase 5)( PAK-5) (p21-activated kinase 7)(PAK-7)	DSLPPRVKDLHK	1	1403.79	3	0.16513	55.314	yes
Q9Y3U8	60S ribosomal protein L36 (Large ribosomal subunit protein eL36)	VTKNVSKPR	1	1027.61	3;4	0.57162	64.224	yes
Q9Y5B9	FACT complex subunit SPT16 (Chromatin-specific transcription elongation factor 140 kDa subunit) (FACT 140 kDa subunit) (FACTp140) (Facilitates chromatin transcription complex subunit SPT16)(hSPT160)	MAVTLDKDAYYR	1	1444.7	2	0.21046	59.265	yes
Q9Y618	Nuclear receptor corepressor 2(N-CoR2) (CTG repeat protein 26) (SMAP270) (Silencing mediator of retinoic acid and thyroid hormone receptor)(SMRT) (T3 receptor-associating factor)(TRAC) (Thyroid-, retinoic-acid-receptor-associated corepressor)	QEINKKLNTHNR	1	1493.81	2	0.79491	49.081	yes
P26599	Polypyrimidine tract-binding protein 1(PTB) (57 kDa RNA-binding protein PPTB-1) (Heterogeneous nuclear ribonucleoprotein I)(hnRNP I)	KENALVQMADGNQAQLAMSHLNGHK	1	2704.32	3	0.35507	44.848	yes
P28289	Tropomodulin-1 (Erythrocyte tropomodulin)(E-Tmod)	EDLVPYTGEKRGK	1	1490.77	3	0.38619	47.537	yes
P31327	Carbamoyl-phosphate synthase [ammonia], mitochondrial (Carbamoyl-phosphate synthetase I)(CPSase I)	AFAMTNQILVEK	1	1363.72	2;4	1.2691	120.57	yes
P51606	N-acylglucosamine 2-epimerase(AGE) (GlcNAc 2-epimerase) (N-acetyl-D-glucosamine 2-epimerase) (Renin-binding protein)(RnBP)	MSKGLPAR	1	858.475	3	2.8681	42.336	yes
P52824	Diacylglycerol kinase theta(DAG kinase theta) (Diglyceride kinase theta)(DGK-theta)	FTSRLHNKGVYVR	1	1575.86	3	0.51265	45.438	yes
P60981	Destrin (Actin-depolymerizing factor)(ADF)	CSTPEEIKKR	1	1189.61	3	1.0731	45.28	yes
Q06455	Protein CBFA2T1 (Cyclin-D-related protein) (Eight twenty one protein) (Protein ETO) (Protein MTG8) (Zinc finger MYND domain-containing protein 2)	KAHDMITTER	1	1200.59	3	1.2097	41.242	yes
Q15032	R3H domain-containing protein 1	NLKPAVTK	1	869.533	4	3.8156	44.639	yes
Q15256	Receptor-type tyrosine-protein phosphatase R(R-PTP-R) (Ch-1PTPase) (NC-PTPCOM1) (Protein-tyrosine phosphatase PCPTP1)	KSGKPVFIYK	1	1165.69	2	1.0826	56.632	yes
Q15326	Zinc finger MYND domain-containing protein 11 (Adenovirus 5 E1A-binding protein) (Bone morphogenetic protein receptor-associated molecule 1) (Protein BS69)	SEMEEEKR	1	1036.45	3	1.0826	63.216	yes
Q15435	Protein phosphatase 1 regulatory subunit 7 (Protein phosphatase 1 regulatory subunit 22)	KVMLALPSVR	1	1112.67	2	4.1826	41.242	yes
Q52WX2	Serine/threonine-protein kinase SBK1 (SH3-binding kinase 1)	LADFGMTR	1	909.438	2	0.62563	50.703	yes
Q5SSQ6	Suppressor APC domain-containing protein 1 (Protein G7d)	EEMAQRGCTKGPR	1	1461.68	3	0.42076	55.261	yes
Q6NUK1	Calcium-binding mitochondrial carrier protein SCaMC-1 (Mitochondrial ATP-Mg/Pi carrier protein 1) (Mitochondrial Ca(2+)-dependent solute carrier protein 1) (Small calcium-binding mitochondrial carrier protein 1) (Solute carrier family 25 member 24)	SDKMNIFGGFR	1	1270.61	5	0.5975	42.336	yes
Q8NDH6	Islet cell autoantigen 1-like protein (Amyotrophic lateral sclerosis 2 chromosomal region candidate gene 14 protein) (Amyotrophic lateral sclerosis 2 chromosomal region candidate gene 15 protein)	LKMDVCQKVDLLGASR	1	1774.94	3	0.91488	42.679	yes
Q8NDV3	Structural maintenance of chromosomes protein 1B(SMC protein 1B)(SMC-1-beta)(SMC-1B)	YSQNELEMIKK	1	1381.69	3	2.7642	47.844	yes
Q8TDB4	Protein MGARP (Corneal endothelium-specific protein 1)(CESP-1) (Hypoxia up-regulated mitochondrial movement regulator protein) (Hypoxia up-regulated mitochondrial movement regulator protein) (Ovary-specific acidic protein)	MYLRRAVSK	1	1122.63	2;3	0.23375	45.653	yes
Q96MX3	Zinc finger protein 48 (Zinc finger protein 553)	GHLVLTPFGIGDGRARPLK	1	2003.14	3	0.50507	56.339	yes
Q99848	Probable rRNA-processing protein EBP2 (EBNA1-binding protein 2) (Nucleolar protein p40)	VQTEVLQKRQQEK	1	1612.89	3	0.27985	46.88	yes
Q9BTT6	Leucine-rich repeat-containing protein 1 (LANO adapter protein) (LAP and no PDZ protein)	DEEDNETRTLLRR	1	1645.8	3	0.41917	40.493	yes
Q9BXG8	Spermatogenic leucine zipper protein 1 (Testis-specific protein 1) (Testis-specific protein NYD-TSP1)	SAEMPTISK	1	962.474	5	0.50392	40.724	yes
Q9BZ95	Histone-lysine N-methyltransferase NSD3 (Nuclear SET domain-containing protein 3) (Protein whistle) (WHSC1-like 1 isoform 9 with methyltransferase activity to lysine) (Wolf-Hirschhorn syndrome candidate 1-like protein 1)(Wolf-Hirschhorn syndrome candidate 1-like protein 1)	KFPTAIFESK	1	1166.63	4	0.12983	40.941	yes
Q9H2S6	Tenomodulin(TeM)(hTeM) (Chondromodulin-1-like protein)(ChM1L)(hChM1L) (Chondromodulin-I-like protein) (Myodulin) (Tendin)	KIYMEIDPVTR	1	1363.72	3	0.69723	50.46	yes
Q9NRR8	CDC42 small effector protein 1 (CDC42-binding protein SCIP1) (Small effector of CDC42 protein 1)	MSEFWHK	1	963.427	2	0.055336	44.349	yes
Q9NZL9	Methionine adenosyltransferase 2 subunit beta (Methionine adenosyltransferase II beta)(MAT II beta) (Putative dTDP-4-keto-6-deoxy-D-glucose 4-reductase)	MLDPSIK	1	802.426	3	0.83825	51.346	yes
Q9UL12	Sarcosine dehydrogenase, mitochondrial(SarDH) (BPR-2)	LDEYKRLMSLGK	1	1451.78	3	0.28161	51.252	yes
Q9Y6R6	Zinc finger protein 780B (Zinc finger protein 779)	KAFTLLTKLVR	1	1288.82	3	0.13997	40.727	yes
Q8IVF2	Protein AHNAK2	DSKFKMPK	1	979.516	2	0.25895	55.461	yes
O60318	Germinal-center associated nuclear protein(GANP) (80 kDa MCM3-associated protein) (MCM3 acetylating protein)(MCM3AP) (MCM3 acetyltransferase)	EEETESREKK	1	1263.59	4	0.25257	40.994	yes
Q8WZ42	Titin (Connectin) (Rhabdomyosarcoma antigen MU-RMS-40.14)	FEISIDGDRHTLR	1	1557.79	3	4.9088	41.218	yes
Q5TIA1	Meiosis inhibitor protein 1 (Meiosis defective protein 1)	HDPRWLLPVTPR	1	1485.82	3	5.1482	63.212	yes
Q17RS7	Flap endonuclease GEN homolog 1	KMMGSVMKPHLR	1	1413.74	3	4.0257	40.941	yes
Q8WZ42	Titin (Connectin) (Rhabdomyosarcoma antigen MU-RMS-40.14)	KTLILRAGVTMR	1	1357.82	3	5.5751	42.095	yes
Q9Y4B5	Microtubule cross-linking factor 1 (Coiled-coil domain-containing protein 165) (PAR-1-interacting protein) (SOGA family member 2)	LLADSHSLVMDLR	1	1468.77	4	3.7494	50.484	yes
Q9UL36	Zinc finger protein 236	QELAGTR	1	773.403	2	4.27	55.441	yes
Q6RI45	Bromodomain and WD repeat-containing protein 3	RISALMWEVR	1	1259.68	3	1.0376	47.187	yes
O15047	Histone-lysine N-methyltransferase SETD1A (Lysine N-methyltransferase 2F) (SET domain-containing protein 1A)(hSET1A) (Set1/Ash2 histone methyltransferase complex subunit SET1)	SIMQRDLNRK	1	1259.68	3	1.687	59.067	yes
Q9UPP1	Histone lysine demethylase PHF8 (PHD finger protein 8)	SRAIVQRGR	1	1041.62	2	2.4155	63.816	yes
O15050	TPR and ankyrin repeat-containing protein 1 (Lupus brain antigen 1 homolog)	VGTQMERVR	1	1074.56	2	1.3535	55.314	yes
Q86X51	Uncharacterized protein CXorf67	RGRDSAPVSAPR	0.999999	1267.67	3	4.4334	71.03	yes
Q05193	Dynamin-1 (EC 3.6.5.5)	TIMHLMINNTK	0.999999	1314.68	3	1.8923	74.841	yes
Q70CQ2	Ubiquitin carboxyl-terminal hydrolase 34 (EC 3.4.19.12) (Deubiquitinating enzyme 34) (Ubiquitin thioesterase 34) (Ubiquitin-specific-processing protease 34)	TWPGKSRK	0.999999	958.535	2	4.1699	73.26	yes
Q68DQ2	Very large A-kinase anchor protein (vlAKAP) (Beta/gamma crystallin domain-containing protein 3)	NTPLAMSDVGK	0.999996	1131.56	2	0.31068	67.08	yes
Q8TAW3	Zinc finger protein 671	DSVKSCR	0.999995	793.375	2	5.7453	94.662	yes
O75691	Small subunit processome component 20 homolog (Down-regulated in metastasis protein) (Novel nucleolar protein 73) (NNP73) (Protein Key-1A6)	LFSVIKNKLSR	0.999994	1303.8	2	1.6251	69.721	yes
Q99584	Protein S100-A13 (S100 calcium-binding protein A13)	QEGRKDSLSVNEFK	0.999994	1635.82	3	2.5503	66.538	yes
Q14765	Signal transducer and activator of transcription 4	ASIDKNVSTLSNRR	0.999993	1559.84	4	0.29524	50.897	yes
Q9Y255	PRELI domain-containing protein 1, mitochondrial (25 kDa protein of relevant evolutionary and lymphoid interest) (Px19-like protein)	EVTPDQKLLSR	0.999993	1284.7	3	0.34395	61.815	yes
Q14573	Inositol 1,4,5-trisphosphate receptor type 3 (IP3 receptor isoform 3) (IP3R 3) (InsP3R3) (Type 3 inositol 1,4,5-trisphosphate receptor) (Type 3 InsP3 receptor)	TLQQMLLKKTK	0.999993	1330.8	3	0.83651	79.148	yes
Q9C0H9	SRC kinase signaling inhibitor 1 (SNAP-25-interacting protein) (SNIP) (p130Cas-associated protein) (p140Cap)	YRTEKPSK	0.999992	1007.54	2	4.1873	64.654	yes
Q9BQI6	SMC5-SMC6 complex localization factor protein 1 (Ankyrin repeat domain-containing protein 32) (BRCT domain-containing protein 1) (Smc5/6 localization factor 1)	MEDGTPKHIIQMTGFK	0.999988	1831.9	4	1.9594	62.68	yes
Q9ULL0	Acrosomal protein KIAA1210	SKFQPQMSSK	0.999986	1166.58	3	3.352	72.2	yes
P23588	Eukaryotic translation initiation factor 4B (eIF-4B)	RESEKSLENETLNK	0.999985	1675.84	3	2.0382	69.864	yes
Q8N319	Uncharacterized protein C6orf223	TRGWVQTLARMSR	0.999985	1560.83	3	2.3208	59.116	yes
A8MPX8	Protein phosphatase 2C-like domain-containing protein 1	GPLLFSTSEPNLTK	0.999985	1502.8	3	1.1795	68.463	yes
Q5T036	Uncharacterized protein FAM120AOS (FAM120A opposite strand protein)	TPNRDSWR	0.999984	1030.49	2	1.0348	71.379	yes
Q9C0E2	Exportin-4 (Exp4)	VSEVESR	0.999982	804.398	2	1.3865	73.039	yes
Q0VF49	Uncharacterized protein KIAA2012	TKGPKSER	0.999978	901.498	2	1.8219	67.494	yes
O00566	U3 small nucleolar ribonucleoprotein protein MPP10 (M phase phosphoprotein 10)	DKALKSSQAFFSK	0.999978	1455.77	4	1.8602	55.261	yes
P62685	Endogenous retrovirus group K member 8 Gag polyprotein (HERV-K115 Gag protein) (HERV-K_8p23.1 provirus ancestral Gag polyprotein) (Gag polyprotein)	LNPTAPPSR	0.999976	951.514	2	0.070879	78.264	yes
Q8WZ42	Titin (EC 2.7.11.1) (Connectin) (Rhabdomyosarcoma antigen MU-RMS-40.14)	LSDHSVEPGK	0.999976	1067.52	2	2.9626	62.463	yes
P28065	Proteasome subunit beta type-9 (EC 3.4.25.1) (Low molecular mass protein 2) (Macropain chain 7) (Multicatalytic endopeptidase complex chain 7) (Proteasome chain 7) (Proteasome subunit beta-1i) (Really interesting new gene 12 protein)	FTTDAIALAMSR	0.999975	1295.65	4	3.2177	64.82	yes
A6NIV6	Leucine-rich repeat and IQ domain-containing protein 4 (Leucine-rich repeat-containing protein 64)	DIKSVEHSPK	0.999973	1138.6	2;3	4.677	68.786	yes
P0DJR0	GTPase IMAP family member GIMD1 (GIMAP family P-loop NTPase domain-containing protein 1)	SCHLHSFMRR	0.999973	1272.6	2	0.40175	62.463	yes
Q7L590	Protein MCM10 homolog (HsMCM10)	TNPNSIKK	0.999973	900.503	2	2.6248	49.097	yes
Q96RW7	Hemicentin-1 (Fibulin-6) (FIBL-6)	IILNCQATGEPQPTITWSR	0.999972	2127.08	3	0.76911	78.326	yes
Q8NAB2	Kelch repeat and BTB domain-containing protein 3 (BTB and kelch domain-containing protein 3)	SLLDVESYNPLSK	0.999972	1463.75	3	4.063	57.164	yes
Q9UJY1	Heat shock protein beta-8 (HspB8) (Alpha-crystallin C chain) (E2-induced gene 1 protein) (Protein kinase H11) (Small stress protein-like protein HSP22)	SGMVPRGPTATAR	0.99997	1299.67	3	1.603	55.04	yes
Q5QJE6	Deoxynucleotidyltransferase terminal-interacting protein 2 (Estrogen receptor-binding protein) (LPTS-interacting protein 2) (LPTS-RP2) (Terminal deoxynucleotidyltransferase-interacting factor 2) (TdIF2) (TdT-interacting factor 2)	AQTEKKDSK	0.999968	1033.54	3	0.12402	76.221	yes
Q9UIF8	Bromodomain adjacent to zinc finger domain protein 2B (hWALp4)	DNFSFSAK	0.999967	914.413	2	2.716	81.296	yes
Q9NR48	Histone-lysine N-methyltransferase ASH1L (EC 2.1.1.43) (ASH1-like protein) (huASH1) (Absent small and homeotic disks protein 1 homolog) (Lysine N-methyltransferase 2H)	KLMSCPLAGLISK	0.999967	1359.76	3	0.11395	67.997	yes
Q9BT25	HAUS augmin-like complex subunit 8 (HEC1/NDC80-interacting centrosome-associated protein 1) (Sarcoma antigen NY-SAR-48)	SSLLQKSK	0.999964	889.523	4	2.7607	51.346	yes
P15924	Desmoplakin (DP) (250/210 kDa paraneoplastic pemphigus antigen)	DSQKNFVDPVTK	0.999963	1376.69	3	1.3234	53.567	yes
Q9Y2U8	Inner nuclear membrane protein Man1 (LEM domain-containing protein 3)	NSPPNSLTPCLK	0.999963	1269.64	3	0.10554	46.796	yes
Q8WWI1	LIM domain only protein 7 (LMO-7) (F-box only protein 20) (LOMP)	DIILRTEQNSGR	0.999962	1400.74	3	4.3953	69.216	yes
Q7Z2Y8	Interferon-induced very large GTPase 1 (Interferon-induced very large GTPase pseudogene 1)	SQIMNCLLSKR	0.999962	1291.67	3	1.0929	68.132	yes
Q16514	Transcription initiation factor TFIID subunit 12 (Transcription initiation factor TFIID 20/15 kDa subunits) (TAFII-20/TAFII-15) (TAFII20/TAFII15)	LSPENNQVLTKK	0.999959	1369.76	3	0.64654	55.261	yes
P21980	Protein-glutamine gamma-glutamyltransferase 2 (EC 2.3.2.13) (Tissue transglutaminase) (Transglutaminase C) (TG(C)) (TGC) (TGase C) (Transglutaminase H) (TGase H) (Transglutaminase-2) (TGase-2)	ISTKSVGR	0.999956	846.492	3	0.28041	72.2	yes
O94913	Pre-mRNA cleavage complex 2 protein Pcf11 (Pre-mRNA cleavage complex II protein Pcf11)	TEKDVSRK	0.999953	961.519	2	1.6551	60.91	yes
Q9Y6U3	Adseverin (Scinderin)	NGTSKKGGQAPAPPTR	0.99995	1565.83	2	4.8159	53.3	yes
Q52M93	Zinc finger protein 585B (zinc finger protein 41-like protein)	SNLNIHQKIHTGER	0.999949	1645.86	4	5.854	52.576	yes
Q9BZQ8	Protein Niban (Cell growth-inhibiting gene 39 protein) (Protein FAM129A)	SDMDQIVNSK	0.999947	1135.52	2	3.9685	57.532	yes
Q14807	Kinesin-like protein KIF22 (Kinesin-like DNA-binding protein) (Kinesin-like protein 4)	LSSMDPAMLERLLSLDR	0.999946	1946	3	4.5902	65.038	yes
O75153	Clustered mitochondria protein homolog	TQLGEDHEKTK	0.999946	1284.63	2	1.6198	47.894	yes
Q08AG5	Zinc finger protein 844	CHPSFQMQEKAHTGEK	0.999944	1856.83	3	1.3155	50.806	yes
Q9BXX3	Ankyrin repeat domain-containing protein 30A (Serologically defined breast cancer antigen NY-BR-1)	ETPVKTGCVAR	0.999943	1159.6	3	4.1139	73.499	yes
Q9Y2Y4	Zinc finger and BTB domain-containing protein 32 (FANCC-interacting protein) (Fanconi anemia zinc finger protein) (Testis zinc finger protein) (Zinc finger protein 538)	RFSLKHQMETHYR	0.999943	1731.86	3	0.012169	61.48	yes
O43149	Zinc finger ZZ-type and EF-hand domain-containing protein 1	SMEEARLVPTVK	0.999941	1358.72	3	0.27053	54.772	yes
Q9BV44	THUMP domain-containing protein 3	TPQAFVHPSEQDGER	0.999941	1696.78	2	5.3353	58.32	yes
P36915	Guanine nucleotide-binding protein-like 1 (GTP-binding protein HSR1)	TPQDPSSVLK	0.99994	1070.56	4	4.0229	59.931	yes
Q9P0M9	39S ribosomal protein L27, mitochondrial (L27mt) (MRP-L27) (Mitochondrial large ribosomal subunit protein bL27m)	MASVVLALRTR	0.999934	1215.71	3	2.6114	61.48	yes
Q01167	Forkhead box protein K2 (Cellular transcription factor ILF-1) (FOXK1) (Interleukin enhancer-binding factor 1)	TPLGPLSSR	0.999933	926.519	3	3.6515	66.27	yes
P46821	Microtubule-associated protein 1B (MAP-1B) [Cleaved into: MAP1B heavy chain; MAP1 light chain LC1]	ESKEETPEVTK	0.999932	1275.62	4	2.8654	40.496	yes
P46939	Utrophin (Dystrophin-related protein 1) (DRP-1)	TLKDVLNDSENK	0.999932	1374.7	3	4.7489	58.172	yes
Q6ZUM4	Rho GTPase-activating protein 27 (CIN85-associated multi-domain-containing Rho GTPase-activating protein 1) (Rho-type GTPase-activating protein 27) (SH3 domain-containing protein 20)	SLPAPNHDTLR	0.99993	1219.63	3	0.38953	60.398	yes
Q99835	Smoothened homolog(SMO) (Protein Gx)	SNHPGLLSEKAASK	0.999928	1437.76	4	0.70561	47.726	yes
O75362	Zinc finger protein 217	SLPSAKGKQSPPGPGK	0.999927	1534.85	3	0.4044	64.244	yes
Q3ZCU0	Putative uncharacterized protein FLJ37770	KISAKVISGVLK	0.999922	1241.81	3	5.4375	59.198	yes
Q9HCH5	Synaptotagmin-like protein 2 (Breast cancer-associated antigen SGA-72M) (Exophilin-4)	TLERSAARK	0.99992	1030.59	3	4.6245	73.248	yes
Q15334	Lethal(2) giant larvae protein homolog 1 (LLGL) (DLG4) (Hugl-1) (Human homolog to the D-lgl gene protein)	SADDSLSGVVR	0.999917	1104.54	2	1.1733	63.32	yes
O75044	SLIT-ROBO Rho GTPase-activating protein 2 (srGAP2) (Formin-binding protein 2) (Rho GTPase-activating protein 34)	TATAGRSK	0.999916	790.43	3	0.10259	73.665	yes
Q10570	Cleavage and polyadenylation specificity factor subunit 1 (Cleavage and polyadenylation specificity factor 160 kDa subunit) (CPSF 160 kDa subunit)	TPCRGATEGLSKK	0.999915	1346.7	2	0.97362	54.343	yes
Q5SW79	Centrosomal protein of 170 kDa (Cep170) (KARP-1-binding protein) (KARP1-binding protein)	TEEDSKSIK	0.999914	1035.51	3	2.7706	70.942	yes
P82933	28S ribosomal protein S9, mitochondrial (MRP-S9) (S9mt) (Mitochondrial small ribosomal subunit protein uS9m)	SVTLESKK	0.999912	890.507	4	3.7229	51.066	yes
Q9ULB1	Neurexin-1 (Neurexin I-alpha) (Neurexin-1-alpha)	SDLYIGGVAKETYK	0.999907	1542.79	3	5.2671	50.467	yes
Q4ZHG4	Fibronectin type III domain-containing protein 1 (Activation-associated cDNA protein) (Expressed in synovial lining protein)	KVVASRQYTVR	0.999905	1305.75	2	5.7051	66.56	yes
Q12789	General transcription factor 3C polypeptide 1 (TF3C-alpha) (TFIIIC box B-binding subunit) (Transcription factor IIIC 220 kDa subunit) (TFIIIC 220 kDa subunit) (TFIIIC220) (Transcription factor IIIC subunit alpha)	SDNKMGITPLR	0.999903	1230.64	2	0.38906	57.149	yes
Q9BWT6	Meiotic nuclear division protein 1 homolog	TRLAKELSSLR	0.999901	1272.75	3	0.21493	45.433	yes
Q9BS86	Zona pellucida-binding protein 1 (Inner acrosomal membrane IAM38) (Sp38)	LLLDLSCEISLLK	0.9999	1458.84	3	2.415	79.639	yes
Q2V2M9	FH1/FH2 domain-containing protein 3 (Formactin-2) (Formin homolog overexpressed in spleen 2) (hFHOS2)	VDTSRLEHLFESK	0.999892	1559.79	2	5.614	59.198	yes
P29375	Lysine-specific demethylase 5A (EC 1.14.11.-) (Histone demethylase JARID1A) (Jumonji/ARID domain-containing protein 1A) (Retinoblastoma-binding protein 2) (RBBP-2)	EAETCASVAQLLLSK	0.999881	1561.8	3	2.6565	44.968	yes
O96028	Histone-lysine N-methyltransferase NSD2 (EC 2.1.1.43) (Multiple myeloma SET domain-containing protein) (MMSET) (Nuclear SET domain-containing protein 2) (Protein trithorax-5) (Wolf-Hirschhorn syndrome candidate 1 protein)	TTVSMPR	0.99988	790.401	2	5.227	69.998	yes
Q5T8A7	Protein phosphatase 1 regulatory subunit 26	GGVGSERDKGSEGPAR	0.999875	1557.75	3	5.4795	43.592	yes
Q8IWB6	Inactive serine/threonine-protein kinase TEX14 (Protein kinase-like protein SgK307) (Sugen kinase 307) (Testis-expressed sequence 14) (Testis-expressed sequence 14 protein)	ELNLPTHPHCSR	0.999871	1402.68	3	4.5465	65.179	yes
Q5T1N1	Protein AKNAD1	ICSQRVNSK	0.999866	1033.53	2	2.7776	57.859	yes
A7E2S9	Putative ankyrin repeat domain-containing protein 30B-like	SEEIVEFLLTKNANANAVDK	0.999866	2204.13	4	1.9967	43.208	yes
Q8TE82	SH3 domain and tetratricopeptide repeat-containing protein 1	TRGSLAGSLR	0.999863	1016.57	3	5.9903	47.706	yes
Q9BX69	Caspase recruitment domain-containing protein 6	DSILSHKVLDEDSK	0.999863	1584.8	4	0.69848	54.343	yes
Q14201	Protein BTG3 (Abundant in neuroepithelium area protein) (BTG family member 3) (Protein Tob5)	LTLILQEKYKNHWYPEKPSK	0.999862	2514.36	3	1.1162	43.208	yes
A6NK44	Glyoxalase domain-containing protein 5	MWGRTLEKQSWR	0.999862	1576.79	3	3.7149	53.567	yes
P51608	Methyl-CpG-binding protein 2 (MeCp-2 protein) (MeCp2)	TQPAVATAATAAEK	0.999862	1328.69	3	1.8982	57.267	yes
Q8NF91	Nesprin-1 (Enaptin) (KASH domain-containing protein 1) (KASH1) (Myocyte nuclear envelope protein 1) (Myne-1) (Nuclear envelope spectrin repeat protein 1) (Synaptic nuclear envelope protein 1) (Syne-1)	SQLEGALSK	0.999861	931.497	3	1.4126	61.679	yes
Q9UGU0	Transcription factor 20 (TCF-20) (Nuclear factor SPBP) (Protein AR1) (Stromelysin-1 PDGF-responsive element-binding protein) (SPRE-binding protein)	SVICDISPLR	0.999861	1101.59	2	1.8152	61.161	yes
Q8IZT6	Abnormal spindle-like microcephaly-associated protein (Abnormal spindle protein homolog) (Asp homolog)	TMELLTQNWDLSK	0.99986	1577.78	3	0.60019	55.899	yes
Q7L099	Protein RUFY3 (RUN and FYVE domain-containing protein 3) (Rap2-interacting protein x) (RIPx) (Single axon-regulated protein) (Singar)	VKEESSYILESNR	0.999855	1552.77	3	0.15923	48.568	yes
Q5TZA2	Rootletin (Ciliary rootlet coiled-coil protein)	SNEELRSAVKK	0.999849	1259.68	3	4.9161	68.171	yes
Q9UL18	Protein argonaute-1 (Argonaute1) (hAgo1) (Argonaute RISC catalytic component 1) (Eukaryotic translation initiation factor 2C 1) (eIF-2C 1) (eIF2C 1) (Putative RNA-binding protein Q99)	RVGDTLLGMATQCVQVK	0.999847	1817.95	3	0.57255	54.859	yes
Q96T58	Msx2-interacting protein (SMART/HDAC1-associated repressor protein) (SPEN homolog)	SRLERYTK	0.999845	1051.58	2	5.7424	66.27	yes
Q9ULH0	Kinase D-interacting substrate of 220 kDa (Ankyrin repeat-rich membrane-spanning protein)	DSEPKPDDGRKSFLMK	0.999844	1848.9	3	2.8299	47.037	yes
Q9BXY0	Protein MAK16 homolog (NNP78) (Protein RBM13)	MQSDDVIWDTLGNK	0.999842	1620.75	3	1.7007	52.576	yes
P58876	Histone H2B type 1-D (HIRA-interacting protein 2) (Histone H2B.1 B) (Histone H2B.b)(H2B/b)	MPEPTKSAPAPK	0.999842	1252.65	3	0.65034	52.247	yes
Q0VF96	Cingulin-like protein 1 (Junction-associated coiled-coil protein) (Paracingulin)	APSLGAQSKKEEEVK	0.999837	1599.85	3	2.6462	64.104	yes
Q3V6T2	Girdin (Akt phosphorylation enhancer) (APE) (Coiled-coil domain-containing protein 88A) (G alpha-interacting vesicle-associated protein) (GIV) (Girders of actin filament) (Hook-related protein 1) (HkRP1)	KITNLKITCEK	0.999828	1289.74	3	0.9889	63.624	yes
Q86SG5	Protein S100-A7A (S100 calcium-binding protein A15) (S100 calcium-binding protein A7-like 1) (S100 calcium-binding protein A7A)	SIIGMIDMFHKYTGRDGK	0.999817	2068.02	3	4.3861	57.788	yes
Q9NQL9	Doublesex- and mab-3-related transcription factor 3	ISIPDDGCPFVSK	0.999815	1376.66	3	0.055336	58.172	yes
Q9ULM0	Pleckstrin homology domain-containing family H member 1 (PH domain-containing family H member 1)	SGYLLKMGSQVKTWK	0.999808	1724.93	4	1.2585	50.088	yes
Q8IWG1	WD repeat-containing protein 63 (Testis development protein NYD-SP29)	TQDKMLAQSK	0.999808	1148.59	3	5.2078	56.632	yes
Q2TAZ0	Autophagy-related protein 2 homolog A	TFQSRTLALSR	0.999805	1278.7	3	3.6583	93.442	yes
Q8N693	Homeobox protein ESX1 (Extraembryonic, spermatogenesis, homeobox 1) [Cleaved into: Homeobox protein ESX1-N; Homeobox protein ESX1-C]	LTVTSLMARGGEDEENTR	0.999804	1977.94	3	4.1077	48.899	yes
O43151	Methylcytosine dioxygenase TET3 (EC 1.14.11.n2)	MDSGPVYHGDSR	0.999804	1319.56	3	3.117	50.95	yes
P78412	Iroquois-class homeodomain protein IRX-6 (Homeodomain protein IRXB3) (Iroquois homeobox protein 6)	SPECRMIPGQPPASARR	0.999799	1851.92	4	4.1696	41.695	yes
Q9NU22	Midasin (Dynein-related AAA-ATPase MDN1) (MIDAS-containing protein)	SVLDSTLK	0.999796	861.481	3	3.2864	49.423	yes
Q9H3K2	Growth hormone-inducible transmembrane protein (Dermal papilla-derived protein 2) (Mitochondrial morphology and cristae structure 1) (MICS1) (Transmembrane BAX inhibitor motif-containing protein 5)	GRTGQELKEAALEPSMEK	0.999792	1972.99	3	5.2767	52.52	yes
Q00610	Clathrin heavy chain 1 (Clathrin heavy chain on chromosome 17)(CLH-17)	TLQIFNIEMKSKMK	0.999791	1709.92	3	0.50434	56.414	yes
Q9UIG0	Tyrosine-protein kinase BAZ1B (EC 2.7.10.2) (Bromodomain adjacent to zinc finger domain protein 1B) (Williams syndrome transcription factor) (Williams-Beuren syndrome chromosomal region 10 protein) (Williams-Beuren syndrome chromosomal region 9 protein) (hWALp2)	APRNSGGTPR	0.99979	1011.52	3	5.1258	63.216	yes
Q14004	Cyclin-dependent kinase 13 (EC 2.7.11.22) (EC 2.7.11.23) (CDC2-related protein kinase 5) (Cell division cycle 2-like protein kinase 5) (Cell division protein kinase 13) (hCDK13) (Cholinesterase-related cell division controller)	QLTHQSIINMK	0.999789	1311.7	3	1.2434	53.013	yes
A8MYZ6	Forkhead box protein O6	HNLSLHTR	0.999786	976.52	3	4.5784	65.278	yes
Q4G0J3	La-related protein 7 (La ribonucleoprotein domain family member 7) (P-TEFb-interaction protein for 7SK stability) (PIP7S)	DIEISTEEEKDTGDLK	0.999784	1820.85	3	3.2854	48.527	yes
Q9BRA0	N-alpha-acetyltransferase 38, NatC auxiliary subunit (LSM domain-containing protein 1) (Phosphonoformate immuno-associated protein 2)	TMRIRMTDGR	0.999782	1235.62	3	2.8908	53.756	yes
Q9Y2A0	TP53-target gene 1 protein (TP53-inducible gene 1 protein) (Tumor protein p53-activated protein 1)	MLGSLAPDPGSR	0.999774	1199.6	3	4.9153	49.189	yes
P35249	Replication factor C subunit 4 (Activator 1 37 kDa subunit) (A1 37 kDa subunit) (Activator 1 subunit 4) (Replication factor C 37 kDa subunit) (RF-C 37 kDa subunit) (RFC37)	CSKFRFKPLSDK	0.999773	1454.77	2	0.83635	42.083	yes
Q9BX26	Synaptonemal complex protein 2 (SCP-2) (Synaptonemal complex lateral element protein) (hsSCP2)	TLLQIDICEDVKIKCSK	0.999771	1948.04	3	3.4417	56.514	yes
Q96L73	Histone-lysine N-methyltransferase, H3 lysine-36 and H4 lysine-20 specific (EC 2.1.1.43) (Androgen receptor coactivator 267 kDa protein) (Androgen receptor-associated protein of 267 kDa) (H3-K36-HMTase) (H4-K20-HMTase) (Lysine N-methyltransferase 3B) (Nuclear receptor-binding SET domain-containing protein 1) (NR-binding SET domain-containing protein)	TENMLSMQK	0.99977	1080.49	2	5.9891	57.859	yes
Q9ULC6	Protein-arginine deiminase type-1 (EC 3.5.3.15) (Peptidylarginine deiminase I) (Protein-arginine deiminase type I)	SQGDKKTWR	0.999769	1104.57	2	2.4226	59.35	yes
Q8WXI4	Acyl-coenzyme A thioesterase 11 (Acyl-CoA thioesterase 11) (EC 3.1.2.-) (Acyl-CoA thioester hydrolase 11) (Adipose-associated thioesterase) (Brown fat-inducible thioesterase) (BFIT)	DCSRMVPAEKTR	0.999767	1391.66	3	4.7543	53.211	yes
Q8WXI3	Ankyrin repeat and SOCS box protein 10 (ASB-10)	SHLEGSLPQALPR	0.999765	1403.75	3	0.28948	60.255	yes
Q14781	Chromobox protein homolog 2	LKEPDAPSKSK	0.999763	1198.66	2	5.7412	54.259	yes
Q4G0X4	BTB/POZ domain-containing protein KCTD21 (KCASH2 protein) (Potassium channel tetramerization domain-containing protein 21)	SDPITLNVGGK	0.999763	1099.59	3	0.20794	67.118	yes
P35237	Serpin B6 (Cytoplasmic antiproteinase) (CAP) (Peptidase inhibitor 6) (PI-6) (Placental thrombin inhibitor)	TNGILFCGRFSSP	0.99976	1397.68	3	3.4197	54.343	yes
Q9UBF6	RING-box protein 2 (Rbx2) (CKII beta-binding protein 1) (CKBBP1) (RING finger protein 7) (Regulator of cullins 2) (Sensitive to apoptosis gene protein)	SGGDKMFSLKK	0.999751	1196.62	3	2.7496	54.486	yes
Q96RT1	Protein LAP2 (Densin-180-like protein) (Erbb2-interacting protein) (Erbin)	TMNRLTQLER	0.999751	1260.66	3	3.568	55.721	yes
Q66GS9	Centrosomal protein of 135 kDa (Cep135) (Centrosomal protein 4)	SPDVLSLESRNK	0.99975	1343.7	4	1.7699	49.988	yes
Q8TF65	PDZ domain-containing protein GIPC2	SSGEKIGCGRATLR	0.999742	1433.74	3	0.21628	55.097	yes
Q8WZ42	Titin (EC 2.7.11.1) (Connectin) (Rhabdomyosarcoma antigen MU-RMS-40.14)	KVDPSYLMLPGESAR	0.999741	1661.84	3	3.2742	54.094	yes
Q8IZT6	Abnormal spindle-like microcephaly-associated protein (Abnormal spindle protein homolog) (Asp homolog)	AYKTLHDTRTHFLK	0.999736	1729.93	4	2.0696	46.88	yes
Q9UKL3	CASP8-associated protein 2 (FLICE-associated huge protein)	CPSSLSNSR	0.999732	949.429	4	3.1248	51.193	yes
Q969P6	DNA topoisomerase I, mitochondrial (TOP1mt) (EC 5.99.1.2)	TQKGSGARWEK	0.999729	1246.64	3	2.8682	55.314	yes
Q96E29	Transcription termination factor 3, mitochondrial (Mitochondrial transcription termination factor 3) (mTERF3) (mTERF domain-containing protein 1, mitochondrial)	SLINAAQLTKR	0.999723	1213.71	3	5.4223	56.404	yes
P38935	DNA-binding protein SMUBP-2 (EC 3.6.4.12) (EC 3.6.4.13) (ATP-dependent helicase IGHMBP2) (Glial factor 1) (GF-1) (Immunoglobulin mu-binding protein 2)	RSWQENISLK	0.99972	1259.66	3	5.0735	58.699	yes
A4FU49	SH3 domain-containing protein 21	NEGVDVTSLRGEVESLR	0.99971	1858.94	4	2.9275	42.908	yes
P82094	TATA element modulatory factor (TMF) (Androgen receptor coactivator 160 kDa protein) (Androgen receptor-associated protein of 160 kDa)	DSEAQEAALSREMK	0.999701	1563.72	2	3.6262	57.434	yes
Q9H2Y7	Zinc finger protein 106(Zfp-106) (Zinc finger protein 474)	SLSQKQDPKNISK	0.999701	1471.8	4	4.0456	49.934	yes
Q9H0H5	Rac GTPase-activating protein 1 (Male germ cell RacGap) (MgcRacGAP) (Protein CYK4 homolog) (CYK4) (HsCYK-4)	ISGCDRTVKELK	0.9997	1347.72	3	4.7666	58.511	yes
P09543	2',3'-cyclic-nucleotide 3'-phosphodiesterase (CNP) (CNPase) (EC 3.1.4.37)	GKLYSLGNGRWMLTLAK	0.999687	1907.05	2	4.8157	49.188	yes
Q14692	Ribosome biogenesis protein BMS1 homolog (Ribosome assembly protein BMS1 homolog)	SFHRTQDLKTK	0.999684	1359.73	3	5.7474	55.806	yes
Q8WTV1	THAP domain-containing protein 3	MSSRLRACK	0.999675	1050.54	3	4.4689	60.436	yes
Q5VUA4	Zinc finger protein 318 (Endocrine regulatory protein)	GAPETKGAPETK	0.99967	1184.6	2	0.26462	47.302	yes
P78527	DNA-dependent protein kinase catalytic subunit (DNA-PK catalytic subunit) (DNA-PKcs) (EC 2.7.11.1) (DNPK1) (p460)	NFWSHETR	0.999666	1075.48	3	2.6907	71.342	yes
P51508	Zinc finger protein 81 (HFZ20)	IHTVEKPHELSK	0.999665	1416.77	2	1.6532	48.948	yes
Q70CQ4	Ubiquitin carboxyl-terminal hydrolase 31 (EC 3.4.19.12) (Deubiquitinating enzyme 31) (Ubiquitin thioesterase 31) (Ubiquitin-specific-processing protease 31)	LQMRSNSPSR	0.99966	1174.59	2	1.2039	59.067	yes
P82094	TATA element modulatory factor (TMF) (Androgen receptor coactivator 160 kDa protein) (Androgen receptor-associated protein of 160 kDa)	SSLHESLHIGQSR	0.999659	1449.73	3	0.45904	57.164	yes
Q9BWH2	FUN14 domain-containing protein 2 (Cervical cancer proto-oncogene 3 protein) (HCC-3) (Hepatitis C virus core-binding protein 6)	KNVLVTGGFFGGFLLGMAS	0.999658	1914.01	3	2.6553	46.892	yes
Q99959	Plakophilin-2	AVSMLEADHMLPSR	0.999654	1555.75	3	2.501	74.89	yes
Q14517	Protocadherin Fat 1 (Cadherin family member 7) (Cadherin-related tumor suppressor homolog) (Protein fat homolog) [Cleaved into: Protocadherin Fat 1, nuclear form]	ELQAVYTLSLK	0.999654	1263.71	3	5.0933	53.237	yes
Q9P260	LisH domain and HEAT repeat-containing protein KIAA1468	CTAARMFELTLR	0.999651	1410.71	2	4.8162	45.614	yes
O75165	DnaJ homolog subfamily C member 13 (Required for receptor-mediated endocytosis 8) (RME-8)	EKITEMPSIIK	0.999648	1287.71	3	1.321	48.284	yes
O94826	Mitochondrial import receptor subunit TOM70 (Mitochondrial precursor proteins import receptor) (Translocase of outer membrane 70 kDa subunit) (Translocase of outer mitochondrial membrane protein 70)	ASPAPGSGHPEGPGAHLDMNSLDR	0.999639	2369.08	3	0.30727	44.759	yes
Q9Y2G0	Protein EFR3 homolog B	CSRQDTVFMKK	0.999639	1341.65	3	4.8351	53.237	yes
Q8N0U4	Protein FAM185A	VPSSLQAHLQLSGK	0.999632	1463.81	3	0.52364	75.088	yes
Q14995	Nuclear receptor subfamily 1 group D member 2 (Orphan nuclear hormone receptor BD73) (Rev-erb alpha-related receptor) (RVR) (Rev-erb-beta) (V-erbA-related protein 1-related) (EAR-1R)	CLSVGMSRDAVR	0.999631	1292.63	2	0.45007	51.998	yes
Q86X51	Uncharacterized protein CXorf67	ITLVASALRRR	0.999628	1254.79	2	2.1124	59.418	yes
Q9NS56	E3 ubiquitin-protein ligase Topors (EC 2.3.2.27) (RING-type E3 ubiquitin transferase Topors) (SUMO1-protein E3 ligase Topors) (Topoisomerase I-binding RING finger protein) (Topoisomerase I-binding arginine/serine-rich protein) (Tumor suppressor p53-binding protein 3) (p53-binding protein 3) (p53BP3)	MGSQPPLGSPLSR	0.999625	1325.68	3	3.535	58.172	yes
Q7L591	Docking protein 3 (Downstream of tyrosine kinase 3)	DTGAFLLTTTER	0.99962	1323.67	3	1.344	51.727	yes
Q96A35	39S ribosomal protein L24, mitochondrial (L24mt) (MRP-L24) (Mitochondrial large ribosomal subunit protein uL24m)	TLQEEVMEAMGIKETR	0.999616	1863.91	3	5.1359	42.958	yes
Q9H992	E3 ubiquitin-protein ligase MARCH7 (EC 2.3.2.27) (Axotrophin) (Membrane-associated RING finger protein 7) (Membrane-associated RING-CH protein VII) (MARCH-VII) (RING finger protein 177) (RING-type E3 ubiquitin transferase MARCH7)	CTPLFSRRR	0.999615	1134.61	2	5.9336	63.216	yes
Q7Z7G8	Vacuolar protein sorting-associated protein 13B (Cohen syndrome protein 1)	KSPGQPMRTHTLTSR	0.999615	1695.88	3	0.49328	49.149	yes
Q96IZ5	RNA-binding protein 41 (RNA-binding motif protein 41)	SHVSGEKKTK	0.999607	1099.6	3	5.7781	46.001	yes
P26374	Rab proteins geranylgeranyltransferase component A 2 (Choroideremia-like protein) (Rab escort protein 2) (REP-2)	TCMHTVSDK	0.999591	1020.44	2	2.4763	60.91	yes
Q7Z478	ATP-dependent RNA helicase DHX29 (EC 3.6.4.13) (DEAH box protein 29) (Nucleic acid helicase DDXx)	SAAATEEEKDK	0.999587	1177.55	3	5.1331	67.113	yes
P61371	Insulin gene enhancer protein ISL-1(Islet-1)	CSIGFSK	0.999567	740.353	2	0.56938	68.787	yes
Q8N2N9	Ankyrin repeat domain-containing protein 36B (CLL-associated antigen KW-1)	SGYNTMEK	0.999563	928.396	2	1.7242	62.546	yes
Q13029	PR domain zinc finger protein 2 (EC 2.1.1.43) (GATA-3-binding protein G3B) (Lysine N-methyltransferase 8) (MTB-ZF) (MTE-binding protein) (PR domain-containing protein 2) (Retinoblastoma protein-interacting zinc finger protein) (Zinc finger protein RIZ)	MQSMQTPLGKTRAR	0.99956	1603.83	3	0.94834	66.004	yes
Q9Y230	RuvB-like 2 (EC 3.6.4.12) (48 kDa TATA box-binding protein-interacting protein) (48 kDa TBP-interacting protein) (51 kDa erythrocyte cytosolic protein) (ECP-51) (INO80 complex subunit J) (Repressing pontin 52) (Reptin 52) (TIP49b) (TIP60-associated protein 54-beta) (TAP54-beta)	ATGKISKLGR	0.999558	1029.63	2	0.25676	50.353	yes
Q96T51	RUN and FYVE domain-containing protein 1 (FYVE-finger protein EIP1) (La-binding protein 1) (Rab4-interacting protein) (Zinc finger FYVE domain-containing protein 12)	SEKSVEITK	0.999548	1019.55	3	1.1254	41.448	yes
Q7Z7B0	Filamin-A-interacting protein 1 (FILIP)	SEMEEKVYNLTR	0.999548	1497.71	3	2.4375	55.258	yes
O43683	Mitotic checkpoint serine/threonine-protein kinase BUB1 (hBUB1) (EC 2.7.11.1) (BUB1A)	SNPGNNMACISK	0.999547	1234.54	3	0.0029318	48.948	yes
Q15744	CCAAT/enhancer-binding protein epsilon (C/EBP epsilon)	GPEGSRAASR	0.999529	986.489	3	4.2345	63.076	yes
Q6N021	Methylcytosine dioxygenase TET2 (EC 1.14.11.n2)	VEMSGPVTVLTR	0.99952	1287.69	3	0.16176	47.037	yes
Q96MZ4	Protein FAM218A	SLHQSWEKR	0.999518	1169.59	2	4.938	57.859	yes
P55263	Adenosine kinase (AK) (EC 2.7.1.20) (Adenosine 5'-phosphotransferase)	KTQALPKMNSK	0.999511	1244.69	3	0.98672	62.633	yes
Q92994	Transcription factor IIIB 90 kDa subunit (TFIIIB90) (hTFIIIB90) (B-related factor 1) (BRF-1) (hBRF) (TAF3B2) (TATA box-binding protein-associated factor, RNA polymerase III, subunit 2)	TGRVCRGCGGTDIELDAAR	0.999511	1948.92	3	2.4419	52.862	yes
Q8IWV8	E3 ubiquitin-protein ligase UBR2 (EC 2.3.2.27) (N-recognin-2) (RING-type E3 ubiquitin transferase UBR2) (Ubiquitin-protein ligase E3-alpha-2) (Ubiquitin-protein ligase E3-alpha-II)	TLHQYTGSALKEIPSGWHLWR	0.999504	2479.28	4	0.11675	44.238	yes
P35716	Transcription factor SOX-11	IMEQSPDMHNAEISKR	0.999503	1884.88	3	1.8078	44.44	yes
Q8IY81	pre-rRNA processing protein FTSJ3 (EC 2.1.1.-) (2'-O-ribose RNA methyltransferase SPB1 homolog) (Protein ftsJ homolog 3) (Putative rRNA methyltransferase 3)	TVTELVTK	0.999498	889.512	2	1.0619	51.059	yes
Q9NR20	Dual specificity tyrosine-phosphorylation-regulated kinase 4 (EC 2.7.12.1)	LDTAPEKFSK	0.99949	1134.59	3	5.5588	44.863	yes
Q01085	Nucleolysin TIAR (TIA-1-related protein)	VVKDMATGKSK	0.99949	1162.64	3	2.8363	49.189	yes
Q9BXF6	Rab11 family-interacting protein 5 (Rab11-FIP5) (Gamma-SNAP-associated factor 1) (Gaf-1) (Phosphoprotein pp75) (Rab11-interacting protein Rip11)	AQHTQWYKLHSKPGKK	0.999476	1936.04	4	2.3642	54.898	yes
P78559	Microtubule-associated protein 1A (MAP-1A) (Proliferation-related protein p80) [Cleaved into: MAP1A heavy chain; MAP1 light chain LC2]	SELAKELAKTEK	0.999474	1345.75	3	1.6131	46.985	yes
Q9P2G4	Microtubule-associated protein 10 (Microtubule regulator of 120 KDa)	TEDKKSPESSAK	0.999467	1305.64	3	0.64109	55.258	yes
Q14966	Zinc finger protein 638 (Cutaneous T-cell lymphoma-associated antigen se33-1)(CTCL-associated antigen se33-1) (Nuclear protein 220) (Zinc finger matrin-like protein)	ETLKNVPFSELNLK	0.99946	1630.89	3	1.277	65.043	yes
P30291	Wee1-like protein kinase (WEE1hu) (EC 2.7.10.2) (Wee1A kinase)	HSVLLSASR	0.999456	968.54	4	3.9235	71.806	yes
Q9Y616	Interleukin-1 receptor-associated kinase 3 (IRAK-3) (EC 2.7.11.1) (IL-1 receptor-associated kinase M) (IRAK-M)	YVDQGKSGTR	0.999447	1109.55	3	1.3489	63.184	yes
Q5XX13	F-box/WD repeat-containing protein 10 (F-box and WD-40 domain-containing protein 10) (Ubiquitin ligase-specificity factor)	EKEEEKEENSLMEILSK	0.999446	2063.99	3	3.8924	53.981	yes
Q13114	TNF receptor-associated factor 3 (EC 2.3.2.27) (CAP-1) (CD40 receptor-associated factor 1) (CRAF1) (CD40-binding protein) (CD40BP) (LMP1-associated protein 1) (LAP1) (RING-type E3 ubiquitin transferase TRAF3)	VSLLQNESVEK	0.999445	1244.66	3	1.1233	62.732	yes
P48443	Retinoic acid receptor RXR-gamma (Nuclear receptor subfamily 2 group B member 3) (Retinoid X receptor gamma)	GLSNPSEVETLR	0.999439	1300.66	3	3.568	62.813	yes
Q9NV70	Exocyst complex component 1 (Exocyst complex component Sec3)	YEGLTKNYMDYLSR	0.999433	1751.82	3	1.6031	51.726	yes
Q5VST9	Obscurin (EC 2.7.11.1) (Obscurin-RhoGEF) (Obscurin-myosin light chain kinase) (Obscurin-MLCK)	TEHPAATVTWRK	0.999417	1395.73	3	3.8916	53.08	yes
Q8NA03	Fibrous sheath-interacting protein 1	SAKYSEAWQSK	0.999415	1283.61	3	2.183	40.727	yes
Q86WV1	Src kinase-associated phosphoprotein 1 (Src family-associated phosphoprotein 1) (Src kinase-associated phosphoprotein of 55 kDa) (SKAP-55) (pp55)	DHSFFGSEWQKR	0.999414	1522.7	3	0.60947	53.211	yes
Q9HAU5	Regulator of nonsense transcripts 2 (Nonsense mRNA reducing factor 2) (Up-frameshift suppressor 2 homolog) (hUpf2)	DSLPNNKEKDCSER	0.999397	1633.74	3	4.7857	45.347	yes
Q96N53	Putative uncharacterized protein encoded by LINC00167	TRLFALGSSPR	0.999393	1203.67	2	5.4207	52.247	yes
A3KN83	Protein strawberry notch homolog 1 (Monocyte protein 3) (MOP-3)	YGKISSKHNGSVK	0.999384	1403.75	3	2.8984	46.88	yes
Q03188	Centromere protein C (CENP-C) (Centromere autoantigen C) (Centromere protein C 1) (CENP-C 1) (Interphase centromere complex protein 7)	YEMYSKNAEKPSR	0.999374	1601.75	3	3.8097	52.463	yes
Q86T96	E3 ubiquitin-protein ligase RNF180 (RING finger protein 180) (RING-type E3 ubiquitin transferase RNF180)	QSFQKSNSAKWPLPSCR	0.999374	1962.97	3	1.2	71.98	yes
Q9HCI5	Melanoma-associated antigen E1 (Alpha-dystrobrevin-associated MAGE Protein)(DAMAGE) (Hepatocellular carcinoma-associated protein 1) (MAGE-E1 antigen)	MSLVSQNSRR	0.999372	1176.6	3	0.12881	41.242	yes
Q03989	AT-rich interactive domain-containing protein 5A (ARID domain-containing protein 5A) (Modulator recognition factor 1) (MRF-1)	SLEEEGAAHSGKR	0.999366	1369.66	3	4.5406	43.405	yes
Q6NV74	Uncharacterized protein KIAA1211-like	SPPEMSLLHDVGPGTTIK	0.999366	1877.96	3	1.7458	46.892	yes
Q9H2X6	Homeodomain-interacting protein kinase 2 (hHIPk2) (EC 2.7.11.1)	SLGLIHADLKPENIMLVDPSR	0.999365	2317.25	3	1.6497	54.964	yes
O43172	U4/U6 small nuclear ribonucleoprotein Prp4 (PRP4 homolog) (hPrp4) (U4/U6 snRNP 60 kDa protein) (WD splicing factor Prp4)	CVYTIPAHQNLVTGVK	0.999362	1741.92	3	2.0807	51.009	yes
Q9P2S6	Ankyrin repeat and MYND domain-containing protein 1 (Testis-specific ankyrin-like protein 1) (Zinc finger MYND domain-containing protein 13)	EGYGTMYMKTR	0.999357	1335.6	2	4.285	47.302	yes
P48552	Nuclear receptor-interacting protein 1 (Nuclear factor RIP140) (Receptor-interacting protein 140)	DQKPDTNLPDVTK	0.99934	1469.74	3	1.8193	46.069	yes
O15226	NF-kappa-B-repressing factor (NFkB-repressing factor) (Protein ITBA4) (Transcription factor NRF)	MGWTGGGLGKSGEGIR	0.999322	1561.77	3	1.3938	40.477	yes
Q9BYI3	Hyccin (Down-regulated by CTNNB1 protein A) (Protein FAM126A)	ASLPHGPMKSNK	0.999321	1265.65	2	3.3285	67.334	yes
Q9BTC8	Metastasis-associated protein MTA3	DITLFHAMDTLYR	0.999317	1594.78	3	5.0274	49.081	yes
P46939	Utrophin (Dystrophin-related protein 1) (DRP-1)	DVMSDLQQTNSEK	0.999309	1493.67	3	3.8978	45.891	yes
Q5MJ08	Sperm protein associated with the nucleus on the X chromosome N4 (Nuclear-associated protein SPAN-Xn4) (SPANX-N4) (SPANX family member N4)	MKSPCESNKR	0.999307	1178.55	3	0.24595	58.246	yes
O00471	Exocyst complex component 5 (Exocyst complex component Sec10) (hSec10)	SAMILQRYYDSK	0.999306	1473.73	2	4.6771	48.467	yes
Q5HYM0	Probable ribonuclease ZC3H12B (EC 3.1.-.-) (MCP-induced protein 2) (Zinc finger CCCH domain-containing protein 12B)	SVAMEPEEWLSIAR	0.999299	1616.79	2	3.6555	48.467	yes
Q8TF01	Arginine/serine-rich protein PNISR (PNN-interacting serine/arginine-rich protein) (SR-related protein) (SR-rich protein) (Serine/arginine-rich-splicing regulatory protein 130) (SRrp130) (Splicing factor, arginine/serine-rich 130) (Splicing factor, arginine/serine-rich 18)	MEQQRSQLSK	0.999288	1233.61	2	1.5152	44.425	yes
Q9H8G1	Zinc finger protein 430	SPKLTAHK	0.999274	880.513	2	4.6053	63.419	yes
Q8TAS1	Serine/threonine-protein kinase Kist (EC 2.7.11.1) (Kinase interacting with stathmin) (PAM COOH-terminal interactor protein 2) (P-CIP2) (U2AF homology motif kinase 1)	HTVRSQEWK	0.999269	1169.59	2	2.9347	55.112	yes
Q9HC44	Vasculin-like protein 1 (GC-rich promoter-binding protein 1-like 1)	LTRRTTDR	0.999259	1017.57	3	0.015679	60.478	yes
A6NFN9	Protein ANKUB1 (Ankyrin repeat and ubiquitin domain-containing 1)	VGDTVMVDGFTKPK	0.999239	1492.76	3	0.55313	50.467	yes
Q96D09	G-protein coupled receptor-associated sorting protein 2 (GASP-2)	TEAQAMSGARPK	0.999227	1245.61	3	1.6311	54.023	yes
P47902	Homeobox protein CDX-1 (Caudal-type homeobox protein 1)	SVAAGGGGGSGKTR	0.999223	1160.59	2	5.7055	50.897	yes
Q8TF46	DIS3-like exonuclease 1 (EC 3.1.13.-)	SHLVFSIDPK	0.999222	1141.61	2	5.3894	63.076	yes
P20929	Nebulin	SVDDDPNTARCLR	0.999222	1460.67	2	0.1386	60.161	yes
O15534	Period circadian protein homolog 1 (hPER1) (Circadian clock protein PERIOD 1) (Circadian pacemaker protein Rigui)	TQKELMTALR	0.999214	1189.65	3	4.0453	70.056	yes
Q9H707	Zinc finger protein 552	TPMAGVSPKK	0.999193	1014.55	3	5.7226	44.863	yes
P31629	Transcription factor HIVEP2 (Human immunodeficiency virus type I enhancer-binding protein 2)(HIV-EP2) (MHC-binding protein 2)(MBP-2)	YMTTIRAPSPR	0.999177	1291.67	2	5.7553	48.284	yes
Q8IU81	Interferon regulatory factor 2-binding protein 1 (IRF-2-binding protein 1) (IRF-2BP1) (Probable E3 ubiquitin-protein ligase IRF2BP1) (EC 2.3.2.27) (Probable RING-type E3 ubiquitin transferase IRF2BP1)	APSRNLAPTPR	0.999176	1178.65	2	1.2925	50.108	yes
Q15418	Ribosomal protein S6 kinase alpha-1 (S6K-alpha-1) (EC 2.7.11.1) (90 kDa ribosomal protein S6 kinase 1) (p90-RSK 1) (p90RSK1) (p90S6K) (MAP kinase-activated protein kinase 1a) (MAPK-activated protein kinase 1a) (MAPKAP kinase 1a) (MAPKAPK-1a) (Ribosomal S6 kinase 1) (RSK-1)	DRKETMTLILK	0.999146	1346.76	3	1.5795	53.597	yes
Q99814	Endothelial PAS domain-containing protein 1 (EPAS-1) (Basic-helix-loop-helix-PAS protein MOP2) (Class E basic helix-loop-helix protein 73) (bHLHe73) (HIF-1-alpha-like factor) (HLF) (Hypoxia-inducible factor 2-alpha) (HIF-2-alpha) (HIF2-alpha) (Member of PAS protein 2) (PAS domain-containing protein 2)	GRTVNLKSATWK	0.999142	1359.76	3	4.7605	46.352	yes
Q6ZV50	DNA-binding protein RFX8 (Regulatory factor X 8)	KTYLSNMAKTMR	0.999133	1442.74	4	0.33997	52.391	yes
P23921	Ribonucleoside-diphosphate reductase large subunit (EC 1.17.4.1) (Ribonucleoside-diphosphate reductase subunit M1) (Ribonucleotide reductase large subunit)	SNQQNLGTIK	0.999127	1101.58	3	3.0709	62.466	yes
Q8WWL7	G2/mitotic-specific cyclin-B3	ESFSQEPSALQKK	0.999117	1477.74	3	0.16504	54.65	yes
Q969S3	Zinc finger protein 622 (Zinc finger-like protein 9)	FASFNAYENHLKSR	0.999115	1682.82	3	1.8544	52.576	yes
Q9H0B3	IQ domain-containing protein N	GAASWDTWRNK	0.999114	1290.61	3	2.0038	63.091	yes
O43524	Forkhead box protein O3 (AF6q21 protein) (Forkhead in rhabdomyosarcoma-like 1)	QASSQSWVPG	0.9991	1045.48	3	3.2164	41.117	yes
Q8N8U2	Chromodomain Y-like protein 2 (CDY-like 2)	LLRDSRGPSVEK	0.999099	1355.75	2	2.5737	44.847	yes
Q9H329	Band 4.1-like protein 4B (FERM-containing protein CG1) (Protein EHM2)	TFGRRSMQR	0.999083	1137.58	3	0.28922	64.265	yes
P57059	Serine/threonine-protein kinase SIK1 (EC 2.7.11.1) (Salt-inducible kinase 1) (SIK-1) (Serine/threonine-protein kinase SNF1-like kinase 1) (Serine/threonine-protein kinase SNF1LK)	IPFFMSQDCESLIR	0.999077	1684.8	3	5.1568	55.261	yes
Q6P2D8	X-ray radiation resistance-associated protein 1	LSNPSCFASLAGLR	0.999073	1434.73	3	5.2054	44.426	yes
P78312	Protein FAM193A (Protein IT14)	AVTGENNFTDTMR	0.999069	1454.65	3	2.3473	41.242	yes
Q92782	Zinc finger protein neuro-d4 (BRG1-associated factor 45B) (BAF45B) (D4, zinc and double PHD fingers family 1)	ASAYITLT	0.999038	838.444	2	3.0401	51.346	yes
Q13216	DNA excision repair protein ERCC-8 (Cockayne syndrome WD repeat protein CSA)	QSYYTCKAVCSIGR	0.999038	1577.73	3	0.68946	43.405	yes
Q6N021	Methylcytosine dioxygenase TET2 (EC 1.14.11.n2)	VTKQENPPASCDNVQQK	0.999036	1884.9	2	0.38972	45.873	yes
P16885	1-phosphatidylinositol 4,5-bisphosphate phosphodiesterase gamma-2 (EC 3.1.4.11) (Phosphoinositide phospholipase C-gamma-2) (Phospholipase C-IV) (PLC-IV) (Phospholipase C-gamma-2) (PLC-gamma-2)	QIYSVDQTRR	0.999035	1264.65	3	4.2385	47.844	yes
Q8WY36	HMG box transcription factor BBX (Bobby sox homolog) (HMG box-containing protein 2)	TKPKEDCLLGSAK	0.99902	1388.73	3	5.2312	46.378	yes
Q6ZT83	Uncharacterized protein FLJ44881	SCKLALVGFSSMSEFLFR	0.999018	2021.01	4	1.0198	41.695	yes
Q3KQU3	MAP7 domain-containing protein 1 (Arginine/proline-rich coiled-coil domain-containing protein 1) (Proline/arginine-rich coiled-coil domain-containing protein 1)	SEVSETKQK	0.999015	1034.52	3	5.9806	76.679	yes
Q6SJ93	Protein FAM111B (Cancer-associated nucleoprotein)	QSMVDEVSGK	0.999011	1078.5	2	5.7696	61.765	yes
Q9UBK2	Peroxisome proliferator-activated receptor gamma coactivator 1-alpha (PGC-1-alpha) (PPAR-gamma coactivator 1-alpha) (PPARGC-1-alpha) (Ligand effect modulator 6)	KGPEQSELYAQLSK	0.999009	1576.81	3	4.0119	44.426	yes
Q96AP4	Zinc finger with UFM1-specific peptidase domain protein	STGPLGTHPR	0.998989	1021.53	3	5.5921	45.368	yes
Q6PI77	Protein BHLHb9 (bHLHb9) (Transcription regulator of 60 kDa) (p60TRP)	LLLNMSENPTAAR	0.998981	1428.74	3	2.9086	61.235	yes
Q9BSF8	BTB/POZ domain-containing protein 10 (Glucose metabolism-related protein 1)	MSWEKEEGKSR	0.998979	1365.63	3	2.9084	68.676	yes
Q9BVV7	Mitochondrial import inner membrane translocase subunit Tim21 (TIM21-like protein, mitochondrial)	GGTAVPTSQKVK	0.998969	1171.66	3	4.271	45.433	yes
O75027	ATP-binding cassette sub-family B member 7, mitochondrial (ATP-binding cassette transporter 7) (ABC transporter 7 protein)	VAIVGGSGSGK	0.998963	930.513	2	2.7577	56.548	yes
Q9NSB8	Homer protein homolog 2 (Homer-2) (Cupidin)	KNWMPASKQAVTVSYFYDVTR	0.99896	2490.24	4	3.5209	47.082	yes
Q49AR2	UPF0489 protein C5orf22	MSDSAGGRAGLRR	0.998949	1332.67	3	1.4074	50.786	yes
Q53TS8	C2 calcium-dependent domain-containing protein 6 (Amyotrophic lateral sclerosis 2 chromosomal region candidate gene 11 protein)	MCSLLSKNDEK	0.998946	1266.59	3	5.8762	50.353	yes
Q9UPU9	Protein Smaug homolog 1 (Smaug 1) (hSmaug1) (Sterile alpha motif domain-containing protein 4A) (SAM domain-containing protein 4A)	QNSDDKLNGWQNSR	0.998942	1660.76	3	5.2173	52.576	yes
Q96N67	Dedicator of cytokinesis protein 7	KDMTHWRQNTEK	0.998941	1572.75	3	4.7373	44.847	yes
Q9UPQ9	Trinucleotide repeat-containing gene 6B protein	EATQKVTEQKTK	0.99894	1389.75	2	5.4856	48.948	yes
P10515	Dihydrolipoyllysine-residue acetyltransferase component of pyruvate dehydrogenase complex, mitochondrial (EC 2.3.1.12) (70 kDa mitochondrial autoantigen of primary biliary cirrhosis) (PBC) (Dihydrolipoamide acetyltransferase component of pyruvate dehydrogenase complex) (M2 antigen complex 70 kDa subunit) (Pyruvate dehydrogenase complex component E2) (PDC-E2) (PDCE2)	KDIDSFVPSK	0.998922	1134.59	3	4.1399	74.533	yes
P07196	Neurofilament light polypeptide(NF-L) (68 kDa neurofilament protein) (Neurofilament triplet L protein)	SRFTVLTESAAK	0.998921	1308.7	4	0.0069274	61.265	yes
Q92974	Rho guanine nucleotide exchange factor 2 (Guanine nucleotide exchange factor H1) (GEF-H1) (Microtubule-regulated Rho-GEF) (Proliferating cell nucleolar antigen p40)	MSRIESLTRAR	0.998918	1318.71	4	0.824	51.286	yes
Q86W56	Poly(ADP-ribose) glycohydrolase (EC 3.2.1.143)	TLFCYFRRVTEK	0.998902	1561.81	3	3.8301	51.643	yes
Q9H116	GDNF-inducible zinc finger protein 1 (Zinc finger and BTB domain-containing protein 23) (Zinc finger protein 336)	TFAQRNSLYQHIK	0.998893	1604.84	4	2.8957	49.448	yes
Q9H8H0	Nucleolar protein 11	ESTSCPVVQK	0.998892	1076.52	3	2.482	56.013	yes
Q5FWF5	N-acetyltransferase ESCO1 (CTF7 homolog 1) (Establishment factor-like protein 1)(EFO1p)(hEFO1) (Establishment of cohesion 1 homolog 1)(ECO1 homolog 1)(ESO1 homolog 1)	SQAKSSSESK	0.99889	1037.5	2	1.0306	64.73	yes
Q9H2W2	Homeobox protein MIXL1 (Homeodomain protein MIX) (hMix) (MIX1 homeobox-like protein 1) (Mix.1 homeobox-like protein)	LAALTLLPESR	0.998885	1182.7	2	1.2645	62.088	yes
Q92733	Proline-rich protein PRCC (Papillary renal cell carcinoma translocation-associated gene protein)	NTWSENKLSR	0.998883	1233.61	2	5.4726	57.785	yes
Q9NW82	WD repeat-containing protein 70	SVFKPRTMQGK	0.998882	1277.69	3	1.3747	49.3	yes
Q9NRX1	RNA-binding protein PNO1	GGKTKFTIENVTR	0.998879	1449.79	2	2.563	51.612	yes
P0C881	Radial spoke head 10 homolog B	RSPSLFLCFTK	0.998873	1297.69	3	2.2405	45.653	yes
Q9HD90	Neurogenic differentiation factor 4 (NeuroD4) (Class A basic helix-loop-helix protein 4) (bHLHa4) (Protein atonal homolog 3) (ATH-3) (Atoh3)	MSKTFVKSK	0.998853	1054.58	4	0.94354	66.989	yes
Q9NZN8	CCR4-NOT transcription complex subunit 2 (CCR4-associated factor 2)	SSPSIICMPKQQPSR	0.998845	1657.83	3	3.4287	59.227	yes
Q5SYE7	NHS-like protein 1	SNYQDKSLSR	0.998844	1196.58	2	3.9172	67.334	yes
Q9GZY0	Nuclear RNA export factor 2 (Cancer/testis antigen 39) (CT39) (TAP-like protein 2) (TAPL-2)	WHSEDEIRITTWRNR	0.998842	1997.98	3	1.4792	46.069	yes
Q13207	T-box transcription factor TBX2 (T-box protein 2)	LGTEMVITK	0.998824	990.542	3	3.8861	49.423	yes
Q8IZT6	Abnormal spindle-like microcephaly-associated protein (Abnormal spindle protein homolog) (Asp homolog)	TMELLTQNWDLSKK	0.998823	1705.87	3	3.7362	59.227	yes
A6NKC9	SH2 domain-containing protein 7	MEDSLKQLSLGR	0.998815	1375.71	3	1.3726	52.247	yes
O95202	Mitochondrial proton/calcium exchanger protein (Leucine zipper-EF-hand-containing transmembrane protein 1)	TGEEKYVEESKASK	0.998809	1583.77	3	3.4988	40.88	yes
Q14651	Plastin-1 (Intestine-specific plastin) (I-plastin)	RYTLNVLSDLGEGEK	0.998793	1692.87	4	0.31484	54.764	yes
Q8NEF9	Serum response factor-binding protein 1 (SRF-dependent transcription regulation-associated protein) (p49/STRAP)	TPADPKLKTLSQTK	0.998792	1526.87	3	0.38863	53.136	yes
Q14140	SERTA domain-containing protein 2 (Transcriptional regulator interacting with the PHD-bromodomain 2)(TRIP-Br2)	MDLTELDHIMEVLVGS	0.998779	1800.86	4	4.632	41.577	yes
O43242	26S proteasome non-ATPase regulatory subunit 3 (26S proteasome regulatory subunit RPN3) (26S proteasome regulatory subunit S3) (Proteasome subunit p58)	RTMTNALRK	0.998775	1089.61	2	2.215	67.897	yes
P16870	Carboxypeptidase E (CPE) (EC 3.4.17.10) (Carboxypeptidase H) (CPH) (Enkephalin convertase) (Prohormone-processing carboxypeptidase)	GNETIVNLIHSTR	0.998769	1452.77	4	4.9967	41.242	yes
Q96MU7	YTH domain-containing protein 1 (Splicing factor YT521) (YT521-B)	SVILIFSVRESGK	0.998769	1433.82	3	1.9782	41.684	yes
Q9HCM7	Fibrosin-1-like protein (AUTS2-like protein) (HBV X-transactivated gene 9 protein) (HBV XAg-transactivated protein 9)	MPARASPPHSK	0.998764	1177.6	2	4.4565	56.414	yes
Q92598	Heat shock protein 105 kDa (Antigen NY-CO-25) (Heat shock 110 kDa protein)	VEDVSAVEIVGGATR	0.998764	1500.78	3	5.7837	46.704	yes
Q8WWV3	Reticulon-4-interacting protein 1, mitochondrial (NOGO-interacting mitochondrial protein)	SGYGATALNMKR	0.998762	1267.63	3	1.6405	51.979	yes
Q8NBH2	Kyphoscoliosis peptidase (EC 3.4.-.-)	GMLSAHPETSMIR	0.998754	1428.69	3	5.3332	48.948	yes
Q86XN6	Zinc finger protein 761	MAFSQGLLTFR	0.998754	1269.65	2	0.39855	48.284	yes
P43251	Biotinidase (Biotinase) (EC 3.5.1.12)	SRFVVCIMSGAR	0.998751	1324.67	3	0.78022	73.834	yes
Q12955	Ankyrin-3 (ANK-3) (Ankyrin-G)	ASKMKQVSQSEK	0.99873	1349.7	3	2.1387	62.466	yes
Q13625	Apoptosis-stimulating of p53 protein 2 (Bcl2-binding protein) (Bbp) (Renal carcinoma antigen NY-REN-51) (Tumor suppressor p53-binding protein 2) (53BP2) (p53-binding protein 2) (p53BP2)	MDLTLAELQEMASR	0.998692	1606.77	3	4.839	53.034	yes
Q99661	Kinesin-like protein KIF2C (Kinesin-like protein 6) (Mitotic centromere-associated kinesin) (MCAK)	MVSEEMEEQVHSIR	0.998692	1702.77	3	3.0722	43.798	yes
Q8TCX1	Cytoplasmic dynein 2 light intermediate chain 1 (Dynein 2 light intermediate chain)	TNAKAVSEMR	0.998685	1105.56	2	3.6705	50.353	yes
Q9UL36	Zinc finger protein 236	HSRIHTGERPFHCTLCEK	0.998685	2150.03	4	1.6071	40.857	yes
Q4L180	Filamin A-interacting protein 1-like (130 kDa GPBP-interacting protein) (90 kDa GPBP-interacting protein) (Protein down-regulated in ovarian cancer 1) (DOC-1)	ISDPQVFSK	0.998683	1019.53	3	0.46255	61.213	yes
Q969Q1	E3 ubiquitin-protein ligase TRIM63 (EC 2.3.2.27) (Iris RING finger protein) (Muscle-specific RING finger protein 1) (MuRF-1) (MuRF1) (RING finger protein 28) (RING-type E3 ubiquitin transferase TRIM63) (Striated muscle RING zinc finger protein) (Tripartite motif-containing protein 63)	VTKENSHQVKEELSQK	0.998678	1882.97	3	5.1085	40.983	yes
Q9H7R5	Zinc finger protein 665 (Zinc finger protein 160-like)	VFTQNSHLANHR	0.998669	1422.71	3	5.9165	52.463	yes
Q8WZ42	Titin (EC 2.7.11.1) (Connectin) (Rhabdomyosarcoma antigen MU-RMS-40.14)	DESYEELLRKTK	0.99866	1509.77	3	2.5883	46.352	yes
O75920	Small EDRK-rich factor 1 (Protein 4F5) (h4F5) (SMA modifier 1)	KQSSGGQKSESK	0.998638	1249.63	3	3.739	40.154	yes
O00410	Importin-5 (Imp5) (Importin subunit beta-3) (Karyopherin beta-3) (Ran-binding protein 5) (RanBP5)	ENVNATENCISAVGKIMK	0.998637	1919.94	3	1.6137	55.011	yes
Q2TAK8	PWWP domain-containing protein MUM1 (Mutated melanoma-associated antigen 1) (MUM-1) (Protein expandere)	KSIQQDVLGTK	0.998632	1215.68	3	3.7216	58.116	yes
O75496	Geminin	TLKMIQPSASGSLVGR	0.998605	1643.9	3	5.6581	41.838	yes
Q86XD8	AN1-type zinc finger protein 4 (AN1-type zinc finger and ubiquitin domain-containing protein-like 1)	DITEMTNKASK	0.998602	1236.6	3	5.2277	53.567	yes
Q9UKI9	POU domain, class 2, transcription factor 3 (Octamer-binding protein 11) (Oct-11) (Octamer-binding transcription factor 11) (OTF-11) (Transcription factor PLA-1) (Transcription factor Skn-1)	MSGDVADSTDAR	0.9986	1223.51	3	0.42649	61.344	yes
Q9BRV8	Suppressor of IKBKE 1 (Suppressor of IKK-epsilon)	ENSMDTASQAIK	0.998587	1293.59	3	1.4856	67.214	yes
Q711Q0	Uncharacterized protein C10orf71	KGKESLQDTLEEK	0.998571	1503.78	3	3.6108	42.475	yes
Q96BV0	Zinc finger protein 775	ESGLAGNGTGAGLVMK	0.998564	1460.73	3	1.2565	40.941	yes
Q8IX21	SMC5-SMC6 complex localization factor protein 2 (Smc5/6 localization factor 1)	TNKADSNVSSGK	0.998549	1206.58	3	2.6725	42.843	yes
O75529	TAF5-like RNA polymerase II p300/CBP-associated factor-associated factor 65 kDa subunit 5L (PCAF-associated factor 65 beta) (PAF65-beta)	GHCGPVYSTR	0.998542	1075.49	3	5.6489	59.153	yes
Q9HA77	Probable cysteine--tRNA ligase, mitochondrial (EC 6.1.1.16) (Cysteinyl-tRNA synthetase) (CysRS)	MSKSLKNYITIK	0.998533	1424.81	3	3.4445	42.475	yes
P17480	Nucleolar transcription factor 1 (Autoantigen NOR-90) (Upstream-binding factor 1) (UBF-1)	TPQQLWYTHEKK	0.998529	1557.79	3	3.5139	51.286	yes
Q9Y592	Centrosomal protein of 83 kDa (Cep83) (Coiled-coil domain-containing protein 41) (Renal carcinoma antigen NY-REN-58)	ASQMAEEITRK	0.998523	1262.63	2	0.1725	50.791	yes
Q9UI47	Catenin alpha-3 (Alpha T-catenin) (Cadherin-associated protein)	SQAVKNTMEMYK	0.998517	1428.67	2	2.4802	46.352	yes
Q8N2Y8	Iporin (Interacting protein of Rab1) (RUN and SH3 domain-containing protein 2)	SYDRSLQRSPPVR	0.998496	1559.82	3	0.32352	44.612	yes
Q8IYH5	ZZ-type zinc finger-containing protein 3	AAPTRGSPTK	0.99849	984.535	3	3.0326	56.013	yes
Q13009	T-lymphoma invasion and metastasis-inducing protein 1 (TIAM-1)	LYVNSVKETGLASK	0.998475	1507.82	3	4.2692	48.532	yes
Q8IWA4	Mitofusin-1 (EC 3.6.5.-) (Fzo homolog) (Transmembrane GTPase MFN1)	LSIIGEVLSR	0.998445	1085.64	2	2.9259	81.676	yes
Q15014	Mortality factor 4-like protein 2 (MORF-related gene X protein) (Protein MSL3-2) (Transcription factor-like protein MRGX)	SAENPPSGSVRKTR	0.998431	1484.77	4	5.6142	47.429	yes
Q86UD3	E3 ubiquitin-protein ligase MARCH3 (EC 2.3.2.27) (Membrane-associated RING finger protein 3) (Membrane-associated RING-CH protein III) (MARCH-III) (RING finger protein 173) (RING-type E3 ubiquitin transferase MARCH3)	TVEDCGSLVNGQPQYVMQVSAK	0.998428	2352.11	4	1.0409	40.986	yes
Q9NXV6	CDKN2A-interacting protein (Collaborator of ARF)	QQSGSPK	0.998419	730.361	2	3.7815	73.975	yes
Q9UL36	Zinc finger protein 236	THIASHFK	0.998413	939.493	4	1.4125	49.358	yes
A0JNW5	UHRF1-binding protein 1-like	DSHMLNTGNDLKENVK	0.998403	1813.86	3	0.11883	45.825	yes
Q9NWS0	PIH1 domain-containing protein 1 (Nucleolar protein 17 homolog)	LLGMGLSEAEAIGADSAR	0.998393	1759.88	3	3.4246	67.579	yes
Q5EBL2	Zinc finger protein 628	SFKGSSGLR	0.998389	937.498	3	2.1917	42.19	yes
P63261	Actin, cytoplasmic 2 (Gamma-actin) [Cleaved into: Actin, cytoplasmic 2, N-terminally processed]	DSYVGDEAQSKR	0.998361	1353.62	3	0.33323	57.785	yes
Q8NDZ0	BEN domain-containing protein 2	QFFHLSLPSSWDDRR	0.998345	1889.92	4	1.0797	50.897	yes
O15371	Eukaryotic translation initiation factor 3 subunit D (eIF3d) (Eukaryotic translation initiation factor 3 subunit 7) (eIF-3-zeta) (eIF3 p66)	LGKVADWTGATYQDKR	0.998344	1807.92	3	4.6338	57.936	yes
P12757	Ski-like protein (Ski-related oncogene) (Ski-related protein)	QKCTCDSNLEKDK	0.998334	1510.68	2	1.714	50.354	yes
P00390	Glutathione reductase, mitochondrial (GR) (GRase) (EC 1.8.1.7)	LPVMTMIPDVDCLLWAIGRVPNTK	0.998329	2681.41	4	2.7066	42.123	yes
P56645	Period circadian protein homolog 3(hPER3) (Cell growth-inhibiting gene 13 protein) (Circadian clock protein PERIOD 3)	VRTSPLNEDVFATK	0.998328	1575.83	3	0.1254	52.821	yes
P17019	Zinc finger protein 708 (Zinc finger protein 15) (Zinc finger protein 15-like 1) (Zinc finger protein KOX8)	QSSNLTNHK	0.998318	1027.5	3	0.77557	44.318	yes
Q3B820	Protein FAM161A	SKEALLASQKPFK	0.998318	1445.82	3	5.5789	54.005	yes
Q9UPN3	Microtubule-actin cross-linking factor 1, isoforms 1/2/3/5 (620 kDa actin-binding protein) (ABP620) (Actin cross-linking family protein 7) (Macrophin-1) (Trabeculin-alpha)	NLLVSVQSRWEK	0.99831	1457.8	3	4.2301	72.681	yes
Q13643	Four and a half LIM domains protein 3 (FHL-3) (Skeletal muscle LIM-protein 2) (SLIM-2)	MSESFDCAK	0.998306	1016.39	2	5.6033	45.368	yes
Q92519	Tribbles homolog 2 (TRB-2)	TQDFEELSSIR	0.99829	1323.63	3	4.9367	53.237	yes
Q9HAZ2	PR domain zinc finger protein 16 (PR domain-containing protein 16) (Transcription factor MEL1) (MDS1/EVI1-like gene 1)	YSLEQHMVIHTEER	0.998267	1770.84	3	3.3593	40.493	yes
Q15415	RNA-binding motif protein, Y chromosome, family 1 member F/J (Y chromosome RNA recognition motif 2)	NRSPSGSLRSAR	0.998266	1286.68	3	0.4472	60.598	yes
Q01105	Protein SET (HLA-DR-associated protein II) (Inhibitor of granzyme A-activated DNase) (IGAAD) (PHAPII) (Phosphatase 2A inhibitor I2PP2A) (I-2PP2A) (Template-activating factor I) (TAF-I)	RSSQTQNKASR	0.998265	1261.65	3	1.3692	52.576	yes
P08237	ATP-dependent 6-phosphofructokinase, muscle type (ATP-PFK) (PFK-M) (EC 2.7.1.11) (6-phosphofructokinase type A) (Phosphofructo-1-kinase isozyme A) (PFK-A) (Phosphohexokinase)	IFANTPDSGCVLGMRK	0.998255	1707.84	3	4.1896	51.009	yes
P49321	Nuclear autoantigenic sperm protein (NASP)	LSVEESEAAGDGVDTK	0.998239	1605.74	3	1.6861	47.774	yes
Q8NCT3	Uncharacterized protein KIAA0895	SFEKGDDFSGK	0.998234	1215.54	2	5.372	41.109	yes
P18850	Cyclic AMP-dependent transcription factor ATF-6 alpha (cAMP-dependent transcription factor ATF-6 alpha) (Activating transcription factor 6 alpha) (ATF6-alpha) [Cleaved into: Processed cyclic AMP-dependent transcription factor ATF-6 alpha]	RMNPSVSPANQR	0.99823	1355.67	3	2.1511	41.684	yes
P20929	Nebulin	LKFTYAMDTMEQALNK	0.998227	1902.92	4	3.3895	73.386	yes
Q8NA70	Protein FAM47B	VSSLRPEPPKTR	0.998197	1365.77	5	1.5481	47.113	yes
Q8N3Y7	Epidermal retinol dehydrogenase 2 (EPHD-2) (RDH-E2) (EC 1.1.1.105) (Retinal short-chain dehydrogenase reductase 2) (retSDR2) (Short-chain dehydrogenase/reductase family 16C member 5)	MSFNLQSSKKLFIFLGK	0.998181	1987.1	3	4.5286	55.011	yes
O95198	Kelch-like protein 2 (Actin-binding protein Mayven)	SNEWFHVAPMNTR	0.998181	1587.73	3	1.5772	49.448	yes
Q14591	Deleted.	SFSQSSDLTK	0.998181	1098.52	3	0.52507	48.284	yes
Q8TEQ6	Gem-associated protein 5 (Gemin5)	DTNSIKYK	0.998155	967.497	2	5.2836	49.097	yes
Q16352	Alpha-internexin (Alpha-Inx) (66 kDa neurofilament protein) (NF-66) (Neurofilament-66) (Neurofilament 5)	VSSTGLSLKK	0.998154	1018.6	3	3.5654	55.258	yes
Q9UQ35	Serine/arginine repetitive matrix protein 2 (300 kDa nuclear matrix antigen) (Serine/arginine-rich splicing factor-related nuclear matrix protein of 300 kDa) (SR-related nuclear matrix protein of 300 kDa) (Ser/Arg-related nuclear matrix protein of 300 kDa) (Splicing coactivator subunit SRm300) (Tax-responsive enhancer element-binding protein 803) (TaxREB803)	RSRSGSSPGLR	0.998151	1158.62	3	2.1058	48.981	yes
Q7RTT5	Protein SSX7	SFDDIAKYFSKK	0.998146	1447.73	2	5.8367	44.564	yes
Q6IE81	Protein Jade-1 (Jade family PHD finger protein 1) (PHD finger protein 17)	MEPITKVSHIPSSR	0.998119	1580.83	3	0.8863	51.463	yes
Q14814	Myocyte-specific enhancer factor 2D	SPPPPTHSTQLGAPSR	0.998098	1628.83	4	0.00079095	83.869	yes
P27816	Microtubule-associated protein 4 (MAP-4)	ASPSKPASAPASR	0.998087	1225.64	3;4	0.0076556	149.6	yes
Q13227	G protein pathway suppressor 2 (GPS-2)	KEMEERMSLEETK	0.998086	1638.76	3	0.22246	56.205	yes
Q8NB66	Protein unc-13 homolog C (Munc13-3)	TIFGNLNPVWDEKFYFECHNSTDRIK	0.998061	3172.51	4	5.4961	41.597	yes
Q9Y2X0	Mediator of RNA polymerase II transcription subunit 16 (Mediator complex subunit 16) (Thyroid hormone receptor-associated protein 5) (Thyroid hormone receptor-associated protein complex 95 kDa component) (Trap95) (Vitamin D3 receptor-interacting protein complex 92 kDa component) (DRIP92)	LTEICTKITDVDIDK	0.99804	1705.88	4	0.9551	50.088	yes
Q9GZN7	Protein rogdi homolog	MATVMAATAAER	0.99804	1221.58	3	1.5966	52.391	yes
Q6P4R8	Nuclear factor related to kappa-B-binding protein (DNA-binding protein R kappa-B) (INO80 complex subunit G)	EKTQQWKLLGQSQDNEK	0.998033	2059.03	3	2.012	54.812	yes
Q5TIA1	Meiosis inhibitor protein 1 (Meiosis defective protein 1)	NIEGSSGNTSLPLVLKKLLLSR	0.998033	2338.36	3	4.9774	49.066	yes
Q7Z699	Sprouty-related, EVH1 domain-containing protein 1 (Spred-1) (hSpred1)	QISKECGSLKSQNR	0.997983	1576.8	3	0.03404	65.295	yes
Q38SD2	Leucine-rich repeat serine/threonine-protein kinase 1 (EC 2.7.11.1)	KSGGMKIVCQSEVR	0.997978	1520.78	3	4.5547	56.514	yes
Q96IV0	Peptide-N(4)-(N-acetyl-beta-glucosaminyl)asparagine amidase (PNGase) (hPNGase) (EC 3.5.1.52) (N-glycanase 1) (Peptide:N-glycanase)	SSRLDGSNK	0.997967	962.478	3	2.9259	69.825	yes
Q15911	Zinc finger homeobox protein 3 (AT motif-binding factor 1) (AT-binding transcription factor 1) (Alpha-fetoprotein enhancer-binding protein) (Zinc finger homeodomain protein 3) (ZFH-3)	HFGINQTSYEGPK	0.997962	1476.7	3	1.7783	74.611	yes
P25786	Proteasome subunit alpha type-1 (EC 3.4.25.1) (30 kDa prosomal protein) (PROS-30) (Macropain subunit C2) (Multicatalytic endopeptidase complex subunit C2) (Proteasome component C2) (Proteasome nu chain)	ETLPAEQDLTTK	0.997957	1344.68	2	0.36597	50.354	yes
P0CJ79	Zinc finger protein 888	MALPQGLLTFRDVAIEFSQEEWK	0.99795	2707.37	4	0.054173	44.735	yes
Q9UNY4	Transcription termination factor 2 (EC 3.6.4.-) (Lodestar homolog) (RNA polymerase II termination factor) (Transcription release factor 2) (F2) (HuF2)	EYTNWEAKETK	0.99794	1397.65	3	0.71229	51.276	yes
Q9H939	Proline-serine-threonine phosphatase-interacting protein 2 (PEST phosphatase-interacting protein 2)	TELIMDAIHKQKSLQFK	0.997939	2029.1	4	2.1286	48.376	yes
Q15386	Ubiquitin-protein ligase E3C (EC 2.3.2.26) (HECT-type ubiquitin transferase E3C) (HectH2)	MFSFEGDFKTRPK	0.99793	1588.77	3	2.1307	46.88	yes
Q9BVN2	RUN and SH3 domain-containing protein 1 (New molecule containing SH3 at the carboxy-terminus) (Nesca)	SEPEKFDSGWKTNTR	0.997924	1780.84	4	5.5755	41.996	yes
Q8NA58	Poly(A)-specific ribonuclease PNLDC1 (EC 3.1.13.4) (PARN-like domain-containing protein 1) (Poly(A)-specific ribonuclease domain-containing protein 1) (HsPNLDC1)	SSPDKDQIKVVIDEVTR	0.997918	1928.02	4	5.0556	46.46	yes
Q0VG06	Fanconi anemia core complex-associated protein 100 (Fanconi anemia-associated protein of 100 kDa)	THEGGTK	0.997904	728.345	2	3.0225	49.418	yes
Q12830	Nucleosome-remodeling factor subunit BPTF (Bromodomain and PHD finger-containing transcription factor) (Fetal Alz-50 clone 1 protein) (Fetal Alzheimer antigen)	QNSIENDIEEKVSDLASR	0.997896	2045.99	5	2.7344	41.088	yes
A6NHR9	Structural maintenance of chromosomes flexible hinge domain-containing protein 1 (SMC hinge domain-containing protein 1)	LMPSNQQHKTDEKGR	0.997895	1767.87	4	0.67765	48.532	yes
P19338	Nucleolin (Protein C23)	TVTPAKAVTTPGK	0.997886	1269.73	3	5.1518	53.448	yes
Q8TE82	SH3 domain and tetratricopeptide repeat-containing protein 1	AYKSALDYTK	0.997883	1158.59	2	0.10388	48.284	yes
O14920	Inhibitor of nuclear factor kappa-B kinase subunit beta (I-kappa-B-kinase beta) (IKK-B) (IKK-beta) (IkBKB) (EC 2.7.11.10) (I-kappa-B kinase 2) (IKK2) (Nuclear factor NF-kappa-B inhibitor kinase beta) (NFKBIKB)	NSMASMSQQLKAK	0.997859	1422.7	4	1.8255	49.934	yes
P42694	Probable helicase with zinc finger domain (EC 3.6.4.-) (Down-regulated in human cancers protein)	QFRVLFLSTVRTR	0.997838	1621.94	3	3.8105	41.218	yes
Q9NXH9	tRNA (guanine(26)-N(2))-dimethyltransferase (EC 2.1.1.216) (tRNA 2,2-dimethylguanosine-26 methyltransferase) (tRNA(guanine-26,N(2)-N(2)) methyltransferase) (tRNA(m(2,2)G26)dimethyltransferase)	TDAPASALWDIMR	0.997831	1445.7	2	2.041	48.948	yes
O14974	Protein phosphatase 1 regulatory subunit 12A (Myosin phosphatase-targeting subunit 1) (Myosin phosphatase target subunit 1) (Protein phosphatase myosin-binding subunit)	YDSLLGRSGSYSYLEER	0.99782	1993.94	3	1.5915	59.864	yes
Q9UQB8	Brain-specific angiogenesis inhibitor 1-associated protein 2 (BAI-associated protein 2) (BAI1-associated protein 2) (Protein BAP2) (Fas ligand-associated factor 3) (FLAF3) (Insulin receptor substrate p53/p58) (IRS-58) (IRSp53/58) (Insulin receptor substrate protein of 53 kDa) (IRSp53) (Insulin receptor substrate p53)	TIMEQFNPSLR	0.997813	1334.67	3	2.6443	53.124	yes
Q9UQ35	Serine/arginine repetitive matrix protein 2 (300 kDa nuclear matrix antigen) (Serine/arginine-rich splicing factor-related nuclear matrix protein of 300 kDa) (SR-related nuclear matrix protein of 300 kDa) (Ser/Arg-related nuclear matrix protein of 300 kDa) (Splicing coactivator subunit SRm300) (Tax-responsive enhancer element-binding protein 803) (TaxREB803)	SGSSQPK	0.9978	689.334	3	3.9035	51.528	yes
Q6WRX3	Protein zyg-11 homolog A	VAGGASMSQISEALSRYR	0.997787	1881.94	3	3.523	55.097	yes
Q969U7	Proteasome assembly chaperone 2 (PAC-2) (Hepatocellular carcinoma-susceptibility protein 3) (Tumor necrosis factor superfamily member 5-induced protein 1)	SIFIKYKSKPFCEK	0.997779	1716.93	2	2.9882	51.359	yes
O43679	LIM domain-binding protein 2 (LDB-2) (Carboxyl-terminal LIM domain-binding protein 1) (CLIM-1) (LIM domain-binding factor CLIM1)	TYNLSPRDCLK	0.99777	1308.65	2	2.2869	55.084	yes
Q8TAS1	Serine/threonine-protein kinase Kist (EC 2.7.11.1) (Kinase interacting with stathmin) (PAM COOH-terminal interactor protein 2) (P-CIP2) (U2AF homology motif kinase 1)	LKHTVRSQEWK	0.997763	1410.77	3	2.7393	47.844	yes
Q6ZQQ6	WD repeat-containing protein 87 (Testis development protein NYD-SP11)	ISSRQSMSPK	0.997751	1119.57	3	1.9177	50.108	yes
Q8NA82	Probable E3 ubiquitin-protein ligase MARCH10 (EC 2.3.2.27) (Membrane-associated RING finger protein 10) (Membrane-associated RING-CH protein X) (MARCH-X) (RING finger protein 190) (RING-type E3 ubiquitin transferase MARCH10)	SSIKISAFKCDSK	0.997725	1412.73	3	0.31261	57.788	yes
Q9P2H0	Centrosomal protein of 126 kDa	SPVCEESYPSVTLR	0.997721	1565.74	3	0.41116	66.989	yes
Q6P6B7	Ankyrin repeat domain-containing protein 16	ATSTHLTALHYAAK	0.997713	1483.78	3	2.2142	51.726	yes
Q8N3K9	Cardiomyopathy-associated protein 5 (Dystrobrevin-binding protein 2) (Genethonin-3) (Myospryn) (SPRY domain-containing protein 2) (Tripartite motif-containing protein 76)	ETSLSGPEALSAVKMEMK	0.99771	1906.94	3	2.6003	41.088	yes
Q8IUF8	Ribosomal oxygenase 2 (60S ribosomal protein L27a histidine hydroxylase) (Bifunctional lysine-specific demethylase and histidyl-hydroxylase MINA) (EC 1.14.11.-) (Histone lysine demethylase MINA) (MYC-induced nuclear antigen) (Mineral dust-induced gene protein) (Nucleolar protein 52) (Ribosomal oxygenase MINA) (ROX)	ELLSSDMKK	0.997704	1049.54	2	1.3218	57.859	yes
O75131	Copine-3 (Copine III)	TERIKNCLNPQFSK	0.997698	1676.87	4	0.97787	49.595	yes
Q02080	Myocyte-specific enhancer factor 2B (RSRFR2) (Serum response factor-like protein 2)	TPPPLYLPTEGR	0.997689	1339.71	2	0.74152	43.897	yes
Q8NCT3	Uncharacterized protein KIAA0895	SILNAEDSLIIDNK	0.997683	1543.81	4	5.5816	43.405	yes
O60237	Protein phosphatase 1 regulatory subunit 12B (Myosin phosphatase-targeting subunit 2) (Myosin phosphatase target subunit 2)	RTPHKSQADTTAEK	0.997658	1568.79	3	4.8833	43.03	yes
O14607	Histone demethylase UTY (EC 1.14.11.-) (Ubiquitously-transcribed TPR protein on the Y chromosome) (Ubiquitously-transcribed Y chromosome tetratricopeptide repeat protein)	CSNTSTLAAR	0.997648	1022.48	2	3.3861	68.657	yes
P50607	Tubby protein homolog	RTKAAATAGGQGGAAR	0.997607	1442.77	3	2.7017	60.949	yes
Q5TID7	Coiled-coil domain-containing protein 181	ENETVMEHTK	0.997598	1216.54	2	1.8641	43.77	yes
Q86T23	Putative ciliary rootlet coiled-coil protein-like 1 protein (Ciliary rootlet coiled-coil protein pseudogene 2)	MLQAKKTEVAEALTK	0.997563	1659.92	3	0.83104	55.724	yes
Q8N1G0	Zinc finger protein 687	SDPDGGDSPLPASGGPLTCK	0.997557	1869.84	3	2.084	42.78	yes
Q9NUW8	Tyrosyl-DNA phosphodiesterase 1 (Tyr-DNA phosphodiesterase 1) (EC 3.1.4.-)	GNPFQFYLTRVSGVKPK	0.997544	1937.05	3	1.7446	40.968	yes
P98172	Ephrin-B1 (EFL-3) (ELK ligand) (ELK-L) (EPH-related receptor tyrosine kinase ligand 2) (LERK-2)	MATQAPGSR	0.997525	917.439	3	1.1119	45.368	yes
O75132	Zinc finger BED domain-containing protein 4	KASWPGLSALAVR	0.997524	1354.77	3	2.06	46.88	yes
Q9HBK9	Arsenite methyltransferase (EC 2.1.1.137) (Methylarsonite methyltransferase) (S-adenosyl-L-methionine:arsenic(III) methyltransferase)	HSKTGPTKR	0.997487	1010.56	2	0.69004	50.353	yes
Q9H8K7	Uncharacterized protein C10orf88	VQTIMESMGSK	0.997465	1209.57	2	2.9045	54.539	yes
P52789	Hexokinase-2 (EC 2.7.1.1) (Hexokinase type II) (HK II) (Muscle form hexokinase)	FLRSEDGSGK	0.997451	1094.54	2	5.51	59.116	yes
Q6PI77	Protein BHLHb9 (bHLHb9) (Transcription regulator of 60 kDa) (p60TRP)	AVSKNKVVAETK	0.997427	1272.74	3	1.8233	40.983	yes
Q96BJ8	Engulfment and cell motility protein 3	LVPLASDMIFAREVISR	0.997423	1916.06	3	0.80078	57.366	yes
O00507	Probable ubiquitin carboxyl-terminal hydrolase FAF-Y (EC 3.4.19.12) (Deubiquitinating enzyme FAF-Y) (Fat facets protein-related, Y-linked) (Ubiquitin thioesterase FAF-Y) (Ubiquitin-specific protease 9, Y chromosome) (Ubiquitin-specific-processing protease FAF-Y)	SHSARMTLAK	0.997414	1100.58	3	1.2287	54.982	yes
Q5JY77	G-protein coupled receptor-associated sorting protein 1 (GASP-1)	MLLNLSENLFMTK	0.997397	1552.8	3	4.4569	50.874	yes
O15056	Synaptojanin-2 (EC 3.1.3.36) (Synaptic inositol 1,4,5-trisphosphate 5-phosphatase 2)	QAKACLVSRVSCER	0.997396	1548.79	3	5.5116	46.069	yes
O15195	Villin-like protein	TWSEKRR	0.997336	961.509	3	0.32824	67.035	yes
Q8IX12	Cell division cycle and apoptosis regulator protein 1 (Cell cycle and apoptosis regulatory protein 1) (CARP-1) (Death inducer with SAP domain)	TILNLENSNKSLSGELR	0.997295	1887.01	4	5.6517	42.191	yes
Q7L8L6	FAST kinase domain-containing protein 5, mitochondrial	RILTTSSAHPGLEFSK	0.997265	1742.93	3	3.7491	45.084	yes
P14136	Glial fibrillary acidic protein (GFAP)	SKFADLTDAAAR	0.997255	1264.64	3	1.9365	71.513	yes
Q5TBA9	Protein furry homolog	RYDELQNSSGRDGKPR	0.99723	1876.91	3	0.3992	46.318	yes
Q92878	DNA repair protein RAD50 (hRAD50) (EC 3.6.-.-)	TLDQAIMKFHSMK	0.997219	1548.78	2	4.051	46.069	yes
O14559	Rho GTPase-activating protein 33 (Rho-type GTPase-activating protein 33) (Sorting nexin-26) (Tc10/CDC42 GTPase-activating protein)	SQRPMGTSRR	0.997215	1174.6	3	2.9951	47.187	yes
Q7Z460	CLIP-associating protein 1 (Cytoplasmic linker-associated protein 1) (Multiple asters homolog 1) (Protein Orbit homolog 1) (hOrbit1)	NYAELTIMKTLEAHK	0.997209	1760.91	3	2.7623	49.425	yes
Q5TYW1	Zinc finger protein 658	ITLFNHMRTDTRGK	0.997134	1688.88	2	4.6493	45.28	yes
Q9Y2H5	Pleckstrin homology domain-containing family A member 6 (PH domain-containing family A member 6) (Phosphoinositol 3-phosphate-binding protein 3) (PEPP-3)	RSHSMKR	0.997109	900.471	2	1.2871	44.692	yes
Q6NSI8	Uncharacterized protein KIAA1841	FDPTQLTK	0.997091	948.492	3	2.9524	66.429	yes
Q9NXH9	tRNA (guanine(26)-N(2))-dimethyltransferase (EC 2.1.1.216) (tRNA 2,2-dimethylguanosine-26 methyltransferase) (tRNA(guanine-26,N(2)-N(2)) methyltransferase) (tRNA(m(2,2)G26)dimethyltransferase)	NAVKTDAPASALWDIMR	0.997063	1857.94	3	3.2557	47.548	yes
Q9BWU0	Kanadaptin (Human lung cancer oncogene 3 protein) (HLC-3) (Kidney anion exchanger adapter protein) (Solute carrier family 4 anion exchanger member 1 adapter protein)	TTSLCAGPSASK	0.997062	1121.54	3	1.9463	40.475	yes
Q96T68	Histone-lysine N-methyltransferase SETDB2 (EC 2.1.1.43) (Chronic lymphocytic leukemia deletion region gene 8 protein) (Lysine N-methyltransferase 1F) (SET domain bifurcated 2)	SRCNQATTLDNQNIK	0.997057	1704.82	4	0.020497	45.28	yes
Q92620	Pre-mRNA-splicing factor ATP-dependent RNA helicase PRP16 (EC 3.6.4.13) (ATP-dependent RNA helicase DHX38) (DEAH box protein 38)	WETNRMLTSGVVHR	0.997049	1684.85	3	4.7169	45.452	yes
Q8TEA7	TBC domain-containing protein kinase-like protein	ESINLFCWTPK	0.997022	1336.65	3	1.0091	56.956	yes
Q13114	TNF receptor-associated factor 3 (EC 2.3.2.27) (CAP-1) (CD40 receptor-associated factor 1) (CRAF1) (CD40-binding protein) (CD40BP) (LMP1-associated protein 1) (LAP1) (RING-type E3 ubiquitin transferase TRAF3)	VSLLQNESVEKNK	0.997004	1486.8	3	0.7076	45.115	yes
Q5CZC0	Fibrous sheath-interacting protein 2	KSISDIPVSK	0.996986	1072.61	4	2.6038	43.77	yes
Q9P265	Disco-interacting protein 2 homolog B (DIP2 homolog B)	MSHSAVNALCR	0.996964	1187.55	2	1.9119	56.043	yes
O14776	Transcription elongation regulator 1 (TATA box-binding protein-associated factor 2S) (Transcription factor CA150)	GPPPPPTASEPTR	0.996931	1302.66	2	0.39467	48.948	yes
A3KMH1	von Willebrand factor A domain-containing protein 8	FPTEGLSSVVR	0.996902	1190.63	3	0.11232	52.49	yes
Q9H379	Putative uncharacterized protein PRO3102	PLASPIQHHEVTR	0.996868	1483.79	2	0.14193	45.28	yes
Q9BSJ6	Protein PIMREG (CALM-interactor expressed in thymus and spleen) (PICALM-interacting mitotic regulator) (Regulator of chromosome segregation protein 1)	IQESCQSGTK	0.996865	1079.49	2	5.617	87.831	yes
Q9BQI6	SMC5-SMC6 complex localization factor protein 1 (Ankyrin repeat domain-containing protein 32) (BRCT domain-containing protein 1) (Smc5/6 localization factor 1)	YSPQMQSAPKR	0.996854	1291.63	2	4.3009	42.21	yes
Q7Z3B4	Nucleoporin p54 (54 kDa nucleoporin)	SPNGTSRR	0.996824	873.442	3	0.066178	50.484	yes
P41212	Transcription factor ETV6 (ETS translocation variant 6) (ETS-related protein Tel1) (Tel)	LWGNHKNRTNMTYEK	0.996797	1890.92	3	4.9854	42.317	yes
Q96QH2	PML-RARA-regulated adapter molecule 1 (PRAM) (PRAM-1)	KPSKLELSDLSKK	0.996766	1471.86	2	0.88149	45.28	yes
Q9BYU1	Pre-B-cell leukemia transcription factor 4 (Homeobox protein PBX4)	QSTCEAVMTLR	0.996763	1237.58	4	1.5296	50.791	yes
Q9UMS5	Putative homeodomain transcription factor 1	LRKTVNGDGSR	0.996753	1201.65	3	1.8819	58.098	yes
Q9P2D1	Chromodomain-helicase-DNA-binding protein 7 (CHD-7) (EC 3.6.4.12) (ATP-dependent helicase CHD7)	NSLDGSQEEKK	0.996735	1233.58	2	4.3633	61.344	yes
P05166	Propionyl-CoA carboxylase beta chain, mitochondrial (PCCase subunit beta) (EC 6.4.1.3) (Propanoyl-CoA:carbon dioxide ligase subunit beta)	VASGCLDINSSVKGAR	0.996732	1575.8	4	3.1187	45.069	yes
Q6ZSZ6	Teashirt homolog 1 (Antigen NY-CO-33) (Serologically defined colon cancer antigen 33)	LVPSTKKR	0.996711	927.587	2	2.4083	67.897	yes
Q5XKK7	Protein FAM219B	MATAEPSGR	0.996672	918.423	2	3.6197	48.794	yes
Q6VMQ6	Activating transcription factor 7-interacting protein 1 (ATF-interacting protein) (ATF-IP) (ATF7-interacting protein) (ATFa-associated modulator) (hAM) (MBD1-containing chromatin-associated factor 1) (P621)	RSKSEDMDNVQSK	0.996643	1522.7	3	0.1691	58.688	yes
P31946	14-3-3 protein beta/alpha (Protein 1054) (Protein kinase C inhibitor protein 1) (KCIP-1) [Cleaved into: 14-3-3 protein beta/alpha, N-terminally processed]	AVTEQGHELSNEER	0.996548	1597.73	2;3	2.5486	141.73	yes
Q96T23	Remodeling and spacing factor 1 (Rsf-1) (HBV pX-associated protein 8) (Hepatitis B virus X-associated protein) (p325 subunit of RSF chromatin-remodeling complex)	SVTPTKEFLK	0.996539	1148.64	4	3.2423	48.423	yes
Q92576	PHD finger protein 3	SNAAPLSNTKKASGK	0.996524	1472.79	3	2.9037	47.621	yes
Q8NDF8	Non-canonical poly(A) RNA polymerase PAPD5 (EC 2.7.7.19) (PAP-associated domain-containing protein 5) (Terminal uridylyltransferase 3) (TUTase 3) (Topoisomerase-related function protein 4-2) (TRF4-2)	VGSQDVSLESSQAVGK	0.996518	1589.79	3	3.2853	62.68	yes
P09012	U1 small nuclear ribonucleoprotein A (U1 snRNP A) (U1-A) (U1A)	AVQGGGATPVVGAVQGPVPGMPPMTQAPR	0.996478	2726.4	4	0.011056	43.055	yes
Q8TAF3	WD repeat-containing protein 48 (USP1-associated factor 1) (WD repeat endosomal protein) (p80)	TLISASSDTTVK	0.996463	1221.65	3	0.93716	54.486	yes
P40763	Signal transducer and activator of transcription 3 (Acute-phase response factor)	TLTDEELADWKRR	0.996442	1631.83	3	5.3239	57.175	yes
Q8IWI9	MAX gene-associated protein (MAX dimerization protein 5)	MGSDEFDISPRISK	0.996433	1580.75	3	0.18236	51.463	yes
Q96HA8	Protein N-terminal glutamine amidohydrolase (EC 3.5.1.122) (Protein NH2-terminal glutamine deamidase) (N-terminal Gln amidase) (Nt(Q)-amidase) (WDYHV motif-containing protein 1)	VIRADSYLKNFASDR	0.996391	1753.91	2	0.78932	52.576	yes
A2RRP1	Neuroblastoma-amplified sequence (Neuroblastoma-amplified gene protein)	IISALSGGSADLGGPRDPLK	0.996388	1923.04	3	0.017008	42.095	yes
Q8WTR2	Dual specificity protein phosphatase 19 (EC 3.1.3.16) (EC 3.1.3.48) (Dual specificity phosphatase TS-DSP1) (Low molecular weight dual specificity phosphatase 3) (LMW-DSP3) (Protein phosphatase SKRP1) (Stress-activated protein kinase pathway-regulating phosphatase 1) (SAPK pathway-regulating phosphatase 1)	ESNKCDRIQENSS	0.996382	1508.65	3	2.6748	65.179	yes
O14682	Ectoderm-neural cortex protein 1 (ENC-1) (Kelch-like protein 37) (Nuclear matrix protein NRP/B) (p53-induced gene 10 protein)	RMSCHAVASGNK	0.996359	1259.59	3	0.85875	55.415	yes
Q8IVE0	Putative ciliary rootlet coiled-coil protein-like 2 protein (Ciliary rootlet coiled-coil protein pseudogene 3)	MRGRYEASQDLLGTLR	0.996312	1864.96	3	0.16766	58.32	yes
Q8WWL7	G2/mitotic-specific cyclin-B3	ITSEEESFYKK	0.99631	1359.66	4	0.16691	45.28	yes
Q6P050	F-box and leucine-rich protein 22	SGVTGARAAAR	0.996309	1015.55	3	2.697	59.067	yes
Q01968	Inositol polyphosphate 5-phosphatase OCRL-1 (EC 3.1.3.36) (Lowe oculocerebrorenal syndrome protein)	AFVDFNEGEIKFIPTYKYDSK	0.99627	2510.24	4	5.9576	40.968	yes
Q9NXG0	Centlein (Centrosomal protein)	VMSNVFENLSK	0.99625	1266.63	3	5.3549	55.314	yes
Q96QE3	ATPase family AAA domain-containing protein 5 (Chromosome fragility-associated gene 1 protein)	TGDEESKARDK	0.996244	1234.58	2	1.03	54.343	yes
Q86T90	Protein hinderin	VTDASISMESLK	0.996165	1279.63	3	2.3206	61.344	yes
P10746	Uroporphyrinogen-III synthase (UROIIIS) (UROS) (EC 4.2.1.75) (Hydroxymethylbilane hydrolyase [cyclizing]) (Uroporphyrinogen-III cosynthase)	TEVWERSLKEK	0.996143	1403.74	3	4.4459	57.267	yes
Q8N3K9	Cardiomyopathy-associated protein 5 (Dystrobrevin-binding protein 2) (Genethonin-3) (Myospryn) (SPRY domain-containing protein 2) (Tripartite motif-containing protein 76)	IINEASQFKPKGISEHTVLSVDGK	0.99612	2596.39	3	0.9185	52.09	yes
Q8TBZ0	Coiled-coil domain-containing protein 110 (Cancer/testis antigen 52) (CT52) (Cancer/testis antigen KM-HN-1)	ECEMLSKMVMETK	0.996114	1557.69	2	3.3998	41.684	yes
Q9HC77	Centromere protein J (CENP-J) (Centrosomal P4.1-associated protein) (LAG-3-associated protein) (LYST-interacting protein 1)	KSLSPSGLK	0.996071	915.539	3	1.275	56.013	yes
Q8TC56	Protein FAM71B	NQSASSTGALQKKASK	0.99606	1604.85	4	0.0054019	43.69	yes
Q86V48	Leucine zipper protein 1	SSSEGLSKGK	0.996047	978.498	3	1.9553	52.49	yes
Q8TEM1	Nuclear pore membrane glycoprotein 210 (Nuclear pore protein gp210) (Nuclear envelope pore membrane protein POM 210) (POM210) (Nucleoporin Nup210) (Pore membrane protein of 210 kDa)	FSNKVYVSDNIR	0.996018	1440.74	3	2.2215	66.663	yes
Q04637	Eukaryotic translation initiation factor 4 gamma 1 (eIF-4-gamma 1) (eIF-4G 1) (eIF-4G1) (p220)	AASLLLEILGLLCKSMGPK	0.996011	1956.12	3	5.2593	55.011	yes
Q9P2N5	RNA-binding protein 27 (RNA-binding motif protein 27)	AANIVIQTEPPVPVSINSNITR	0.996006	2332.28	4	0.20501	89.272	yes
Q8IYD1	Eukaryotic peptide chain release factor GTP-binding subunit ERF3B (Eukaryotic peptide chain release factor subunit 3b) (eRF3b) (G1 to S phase transition protein 2 homolog)	HLIVLINKMDDPTVNWSIER	0.995981	2392.26	4	0.53205	45.618	yes
Q9UHY8	Fasciculation and elongation protein zeta-2 (Zygin II) (Zygin-2)	LSMLSQEIQTLKR	0.995966	1545.85	3	3.3011	46.41	yes
Q6NVH7	ATPase SWSAP1 (SWIM-type zinc finger 7-associated protein 1) (SWS1-associated protein 1) (ZSWIM7-associated protein 1) (ZSWIM7AP1)	GTGTTLDPMR	0.995942	1047.5	3	5.8557	53.756	yes
Q96PZ0	Pseudouridylate synthase 7 homolog (EC 5.4.99.-)	EVLKMDTSIK	0.995941	1162.63	2	1.3395	70.056	yes
P12270	Nucleoprotein TPR (Megator) (NPC-associated intranuclear protein) (Translocated promoter region protein)	QLDTETNLHLNTK	0.995909	1525.77	4	3.6805	47.712	yes
Q711Q0	Uncharacterized protein C10orf71	MKTHQLENGLSR	0.995853	1412.72	3	2.9045	46.796	yes
Q9H329	Band 4.1-like protein 4B (FERM-containing protein CG1) (Protein EHM2)	ASNPVIAAQLCSK	0.995822	1300.68	2	2.2043	49.595	yes
O43426	Synaptojanin-1 (EC 3.1.3.36) (Synaptic inositol 1,4,5-trisphosphate 5-phosphatase 1)	RESPLKIDPFEDLSFNLLAVSK	0.99581	2517.35	4	5.5519	44.167	yes
O95644	Nuclear factor of activated T-cells, cytoplasmic 1 (NF-ATc1) (NFATc1) (NFAT transcription complex cytosolic component) (NF-ATc) (NFATc)	LHDLSPAAYTK	0.99578	1214.63	3	4.2952	56.956	yes
P19367	Hexokinase-1 (EC 2.7.1.1) (Brain form hexokinase) (Hexokinase type I) (HK I)	TVCGVVSRR	0.995769	975.528	2	5.9724	49.418	yes
P48745	Protein NOV homolog (NovH) (CCN family member 3) (Insulin-like growth factor-binding protein 9) (IBP-9) (IGF-binding protein 9) (IGFBP-9) (Nephroblastoma-overexpressed gene protein homolog)	SCGMGFSTRVTNR	0.995765	1414.64	2	1.1614	51.727	yes
Q6ZRI6	Uncharacterized protein C15orf39	GSYFSCPMAGTPK	0.995746	1344.58	3	2.612	61.344	yes
P20718	Granzyme H (EC 3.4.21.-) (CCP-X) (Cathepsin G-like 2) (CTSGL2) (Cytotoxic T-lymphocyte proteinase) (Cytotoxic serine protease C) (CSP-C)	TQTGFKGDSGGPLVCK	0.995704	1593.78	3	2.798	47.037	yes
Q9Y243	RAC-gamma serine/threonine-protein kinase (EC 2.7.11.1) (Protein kinase Akt-3) (Protein kinase B gamma) (PKB gamma) (RAC-PK-gamma) (STK-2)	MSDVTIVK	0.995655	891.474	2	3.7845	43.808	yes
Q5JSS6	Meiosis expressed gene 1 protein homolog	MASSDVKPK	0.995648	961.49	2	4.5921	63.216	yes
O43586	Proline-serine-threonine phosphatase-interacting protein 1 (PEST phosphatase-interacting protein 1) (CD2-binding protein 1) (H-PIP)	KAGGQTEINSLR	0.995632	1272.68	3	2.9924	52.391	yes
Q9NVR5	Protein kintoun (Dynein assembly factor 2, axonemal)	SLAWGSSAGRESAR	0.995563	1433.7	3	2.3905	40.751	yes
Q99698	Lysosomal-trafficking regulator (Beige homolog)	LATKEQTPPDAMALENSR	0.995531	1970.97	4	1.9101	80.387	yes
Q8NAV2	Uncharacterized protein C8orf58	SLRLASKPER	0.995518	1155.67	2	0.39803	46.844	yes
Q69YN4	Protein virilizer homolog	ISSRGGFSGNRGGR	0.995517	1406.71	4	4.0992	45.891	yes
O15535	Zinc finger and SCAN domain-containing protein 9 (Cell proliferation-inducing gene 12 protein) (PRD51) (Zinc finger protein 193)	VEAKSHLQWQESR	0.995459	1596.8	3	0.90444	57.288	yes
O95644	Nuclear factor of activated T-cells, cytoplasmic 1 (NF-ATc1) (NFATc1) (NFAT transcription complex cytosolic component) (NF-ATc) (NFATc)	GETLGPAPRAGGTMK	0.995451	1441.73	2	3.2561	55.912	yes
P46013	Proliferation marker protein Ki-67 (Antigen identified by monoclonal antibody Ki-67) (Antigen KI-67) (Antigen Ki67)	QTPAPAASVTGSRR	0.995434	1397.74	3	1.6562	52.569	yes
A6NGY3	Uncharacterized protein C5orf52	SAQQPVLFSLMNSSEAAMKK	0.995408	2166.08	3	4.9626	40.759	yes
O43175	D-3-phosphoglycerate dehydrogenase (3-PGDH) (EC 1.1.1.95) (2-oxoglutarate reductase) (EC 1.1.1.399) (Malate dehydrogenase) (EC 1.1.1.37)	EVATRMQSFGMK	0.995389	1383.66	2	0.42085	55.335	yes
Q9BZV1	UBX domain-containing protein 6 (UBX domain-containing protein 1)	SEAVERLSVLRTK	0.995363	1486.85	4	1.9841	41.912	yes
Q96Q06	Perilipin-4 (Adipocyte protein S3-12)	GAVQGGLDTTKSVLTGTK	0.995357	1731.94	3	5.7627	48.899	yes
Q2M3D2	Exocyst complex component 3-like protein 2 (HBV X-transactivated gene 7 protein) (HBV XAg-transactivated protein 7)	CSSARTRSR	0.995342	1022.5	2	2.7585	57.55	yes
Q96MY7	Protein FAM161B	DPEQGLEGSLEQPASPRK	0.995313	1936.95	3	4.0431	48.423	yes
P78316	Nucleolar protein 14 (Nucleolar complex protein 14)	AQPSNRMKTEAELAK	0.995301	1672.86	3	4.9509	42.317	yes
Q8TBY8	Polyamine-modulated factor 1-binding protein 1 (PMF-1-binding protein)	DKTLKENSR	0.995295	1089.58	4	4.7251	50.04	yes
Q5M9N0	Coiled-coil domain-containing protein 158	SMEGSDGHAMK	0.995293	1148.46	2	3.4814	50.194	yes
Q9HBL8	NmrA-like family domain-containing protein 1	LVVVFGGTGAQGGSVAR	0.995278	1573.86	3	0.42808	49.216	yes
Q6PIV2	Forkhead box protein R1 (Forkhead box protein N5)	HFPFFRTAPEGWKNTVR	0.995251	2089.06	4	3.7835	49.036	yes
Q12872	Splicing factor, suppressor of white-apricot homolog (Splicing factor, arginine/serine-rich 8) (Suppressor of white apricot protein homolog)	GSSQERSRGVSQEK	0.995229	1533.75	3	5.4394	41.257	yes
Q63HN8	E3 ubiquitin-protein ligase RNF213 (EC 2.3.2.27) (EC 3.6.4.-) (ALK lymphoma oligomerization partner on chromosome 17) (Mysterin) (RING finger protein 213) (RING-type E3 ubiquitin transferase RNF213)	TELYMLFINCLEDSILEK	0.995228	2173.07	3	0.91905	41.088	yes
Q5VWX1	KH domain-containing, RNA-binding, signal transduction-associated protein 2 (Sam68-like mammalian protein 1) (SLM-1) (hSLM-1)	LQEETGAKMSILGK	0.995222	1503.8	3	0.19486	47.855	yes
P62995	Transformer-2 protein homolog beta (TRA-2 beta) (TRA2-beta) (hTRA2-beta) (Splicing factor, arginine/serine-rich 10) (Transformer-2 protein homolog B)	SGSAHGSGKSAR	0.995197	1100.53	2	2.2677	54.898	yes
Q9P2R6	Arginine-glutamic acid dipeptide repeats protein (Atrophin-1-like protein) (Atrophin-1-related protein)	SVNDEGSSDPK	0.995061	1133.48	3	4.8994	61.815	yes
Q9BYS8	Leucine-rich repeat-containing protein 2	NTLTRQSSLPKDR	0.995001	1514.82	3	0.88208	55.755	yes
Q9NSI6	Bromodomain and WD repeat-containing protein 1 (WD repeat-containing protein 9)	TCMHNQKDAVQMPSETLK	0.994986	2059.95	4	5.0885	58.835	yes
Q92540	Protein SMG7 (EST1-like protein C) (SMG-7 homolog) (hSMG-7)	KTPVSEAR	0.99497	886.487	3	0.018839	66.92	yes
P55198	Protein AF-17 (ALL1-fused gene from chromosome 17 protein)	FNKTCYICEEQGRESK	0.994953	1933.87	4	5.854	45.916	yes
Q9NR64	Kelch-like protein 1	RTLMQSPR	0.994934	987.528	3	2.599	50.703	yes
Q6UWM9	UDP-glucuronosyltransferase 2A3 (UDPGT 2A3) (EC 2.4.1.17)	TMTSEDLLR	0.99491	1064.52	2	2.3388	57.59	yes
A8MTL3	RING finger protein 212B	CVTLEKCAVCGTACK	0.994849	1527.69	3	5.6407	53.395	yes
Q8N414	PiggyBac transposable element-derived protein 5 (EC 3.1.-.-) (PiggyBac domain-related protein 5) (PiggyBac transposase 5)	NKPQLHSMVARSLCRNAAGK	0.994765	2180.14	4	5.0779	48.711	yes
O60674	Tyrosine-protein kinase JAK2 (EC 2.7.10.2) (Janus kinase 2) (JAK-2)	AGNQTGLYVLRCSPKDFNK	0.99475	2110.06	3	1.264	40.616	yes
Q14566	DNA replication licensing factor MCM6 (EC 3.6.4.12) (p105MCM)	TSILAAANPISGHYDRSK	0.994706	1899.98	4	3.8696	46.89	yes
P51504	Zinc finger protein 80 (ZNFpT17)	TFYYNSSLTRHMK	0.994691	1646.79	3	1.8204	48.948	yes
Q9UPQ9	Trinucleotide repeat-containing gene 6B protein	WGEGNKMTSGVSQGEWK	0.994628	1879.85	3	1.1092	51.03	yes
Q6PI47	BTB/POZ domain-containing protein KCTD18	FKDSMLASMFSGR	0.994623	1475.69	3	0.58005	62.088	yes
Q8IX06	Putative exonuclease GOR (EC 3.1.-.-) (Antigen GOR homolog) (RNA exonuclease 1 homolog-like 1)	TRVASSSQRSR	0.994623	1233.65	3	5.7585	53.567	yes
Q9UKT5	F-box only protein 4	TFWQSVSKER	0.994541	1266.64	3	2.2345	78.287	yes
P51610	Host cell factor 1 (HCF) (HCF-1) (C1 factor) (CFF) (VCAF) (VP16 accessory protein) [Cleaved into: HCF N-terminal chain 1; HCF N-terminal chain 2; HCF N-terminal chain 3; HCF N-terminal chain 4; HCF N-terminal chain 5; HCF N-terminal chain 6; HCF C-terminal chain 1; HCF C-terminal chain 2; HCF C-terminal chain 3; HCF C-terminal chain 4; HCF C-terminal chain 5; HCF C-terminal chain 6]	ISVATGALEAAQGSK	0.994532	1401.75	3;4	0.010964	171.85	yes
Q6ZW33	MICAL C-terminal-like protein (Mical-cL) (ERK2-binding testicular protein 1) (Ebitein-1)	AWAKQESKTLPAQACTR	0.994513	1887.96	2	1.0314	50.534	yes
Q8IXZ2	Zinc finger CCCH domain-containing protein 3 (Smad-interacting CPSF-like factor)	ASFPSSALPPR	0.994504	1128.59	4	0.11257	44.425	yes
Q9H3U1	Protein unc-45 homolog A (Unc-45A) (GCUNC-45) (Smooth muscle cell-associated protein 1) (SMAP-1)	SLKDPNNSLTLWVIDQGLK	0.9945	2140.15	3	5.165	46.892	yes
Q9HC36	rRNA methyltransferase 3, mitochondrial (EC 2.1.1.-) (16S rRNA (guanosine(1370)-2'-O)-methyltransferase) (16S rRNA [Gm1370] 2'-O-methyltransferase) (RNA methyltransferase-like protein 1)	APSTWEESGLR	0.994473	1231.58	3	5.0912	49.298	yes
Q9HAY6	Beta,beta-carotene 15,15'-monooxygenase (Beta-carotene dioxygenase 1) (Beta-carotene oxygenase 1)	TRQPVQTK	0.994451	956.54	2	3.4101	49.423	yes
Q92625	Ankyrin repeat and SAM domain-containing protein 1A (Odin)	SQQIAALIEDHMTGK	0.994431	1640.82	4	0.63688	46.797	yes
Q9H0C8	Integrin-linked kinase-associated serine/threonine phosphatase 2C (ILKAP) (EC 3.1.3.16)	KTSEEEKNGSEELVEK	0.994413	1834.88	4	1.3783	44.252	yes
Q9UIA9	Exportin-7 (Exp7) (Ran-binding protein 16)	NSTYGVNSNDMMS	0.994393	1418.54	3	2.9587	50.354	yes
Q8WV16	DDB1- and CUL4-associated factor 4 (WD repeat-containing protein 21A)	ADIPSVAFSSR	0.994308	1148.58	3	4.7865	44.425	yes
P08134	Rho-related GTP-binding protein RhoC (Rho cDNA clone 9) (h9)	SEEGRDMANRISAFGYLECSAK	0.994307	2433.11	3	2.1409	44.468	yes
P57771	Regulator of G-protein signaling 8 (RGS8)	TRSTAKLVSK	0.994295	1089.65	2	0.10994	51.445	yes
Q96L73	Histone-lysine N-methyltransferase, H3 lysine-36 and H4 lysine-20 specific (EC 2.1.1.43) (Androgen receptor coactivator 267 kDa protein) (Androgen receptor-associated protein of 267 kDa) (H3-K36-HMTase) (H4-K20-HMTase) (Lysine N-methyltransferase 3B) (Nuclear receptor-binding SET domain-containing protein 1) (NR-binding SET domain-containing protein)	TENMLSMQKNEK	0.994256	1451.67	3	2.796	51.286	yes
Q12986	Transcriptional repressor NF-X1 (EC 2.3.2.-) (Nuclear transcription factor, X box-binding protein 1)	NSGLNCGTQRR	0.994231	1204.57	2	1.7337	47.894	yes
Q6PDB4	Zinc finger protein 880	IYSSVKSHILNKYR	0.99421	1706.95	4	0.022404	76.326	yes
Q9BTE7	DCN1-like protein 5 (DCUN1 domain-containing protein 5) (Defective in cullin neddylation protein 1-like protein 5)	LEAESMGFFTKEEWLK	0.994164	1943.93	4	5.6592	55.98	yes
Q9UBT6	DNA polymerase kappa (EC 2.7.7.7) (DINB protein) (DINP)	DKPIAVGSMSMLSTSNYHARR	0.994161	2320.14	3	1.9029	53.504	yes
P0C671	Uncharacterized protein C6orf222	SQVAHSSKLDRNR	0.994139	1496.78	4	0.95359	45.28	yes
Q9UKT8	F-box/WD repeat-containing protein 2 (F-box and WD-40 domain-containing protein 2) (Protein MD6)	HLSNNLETLLKR	0.994134	1436.81	3	0.17897	48.998	yes
Q9BZF9	Uveal autoantigen with coiled-coil domains and ankyrin repeats	TFCESAKQDR	0.994105	1183.53	2	5.1565	48.981	yes
Q9UBF9	Myotilin (57 kDa cytoskeletal protein) (Myofibrillar titin-like Ig domains protein) (Titin immunoglobulin domain protein)	TVQSDDLHKMIVSEK	0.994103	1728.87	3	0.88455	45.992	yes
O43448	Voltage-gated potassium channel subunit beta-3 (K(+) channel subunit beta-3) (Kv-beta-3)	ESTGRGTGMK	0.99407	1022.48	3	0.075791	58.32	yes
Q8NB12	Histone-lysine N-methyltransferase SMYD1 (EC 2.1.1.43) (SET and MYND domain-containing protein 1)	TIGRMENVEVFTAEGKGR	0.994033	1993.01	3	0.72945	49.343	yes
P35658	Nuclear pore complex protein Nup214 (214 kDa nucleoporin) (Nucleoporin Nup214) (Protein CAN)	SHLVHGSSPGVMGTSVATSASK	0.994009	2096.03	2;3;4;5	0.0012152	210.98	yes
Q9H0E9	Bromodomain-containing protein 8 (Skeletal muscle abundant protein) (Skeletal muscle abundant protein 2) (Thyroid hormone receptor coactivating protein of 120 kDa) (TrCP120) (p120)	SQDLDEELGSTAAGEIVEADVAIGK	0.993935	2516.21	4	4.5613	43.841	yes
O60506	Heterogeneous nuclear ribonucleoprotein Q (hnRNP Q) (Glycine- and tyrosine-rich RNA-binding protein) (GRY-RBP) (NS1-associated protein 1) (Synaptotagmin-binding, cytoplasmic RNA-interacting protein)	QGTKVADSSKGPDEAK	0.993931	1616.8	3	5.7762	48.405	yes
Q7Z4V5	Hepatoma-derived growth factor-related protein 2 (HRP-2) (Hepatoma-derived growth factor 2) (HDGF-2)	TSDQDFTPEKKAAVR	0.993906	1691.85	4	5.9993	41.621	yes
Q05519	Serine/arginine-rich splicing factor 11 (Arginine-rich 54 kDa nuclear protein) (p54) (Splicing factor, arginine/serine-rich 11)	SYSTARRSR	0.993904	1082.56	2	4.9761	58.433	yes
Q9BXT5	Testis-expressed protein 15 (Cancer/testis antigen 42) (CT42)	TIYQTGCQTSTVFPLK	0.993904	1785.9	4	1.8202	40.88	yes
P02545	Prelamin-A/C [Cleaved into: Lamin-A/C (70 kDa lamin) (Renal carcinoma antigen NY-REN-32)]	SVGGSGGGSFGDNLVTR	0.993875	1565.74	2;3	0.037425	73.918	yes
Q5TCQ9	Membrane-associated guanylate kinase, WW and PDZ domain-containing protein 3 (Membrane-associated guanylate kinase inverted 3) (MAGI-3)	APSNAEAKLLEGKSR	0.993868	1569.85	2	4.1355	42.947	yes
Q9UKA2	F-box/LRR-repeat protein 4 (F-box and leucine-rich repeat protein 4) (F-box protein FBL4/FBL5)	TATRGEMMNTHR	0.993851	1403.64	3	0.21395	52.247	yes
Q15078	Cyclin-dependent kinase 5 activator 1 (CDK5 activator 1) (Cyclin-dependent kinase 5 regulatory subunit 1) (TPKII regulatory subunit) [Cleaved into: Cyclin-dependent kinase 5 activator 1, p35 (p35); Cyclin-dependent kinase 5 activator 1, p25 (p25) (Tau protein kinase II 23 kDa subunit) (p23)]	MGTVLSLSPSYR	0.993815	1309.67	3	1.8527	51.771	yes
P36957	Dihydrolipoyllysine-residue succinyltransferase component of 2-oxoglutarate dehydrogenase complex, mitochondrial (EC 2.3.1.61) (2-oxoglutarate dehydrogenase complex component E2) (OGDC-E2) (Dihydrolipoamide succinyltransferase component of 2-oxoglutarate dehydrogenase complex) (E2K)	MLSRSRCVSR	0.993776	1193.61	3	3.2506	45.022	yes
Q96QZ7	Membrane-associated guanylate kinase, WW and PDZ domain-containing protein 1 (Atrophin-1-interacting protein 3) (AIP-3) (BAI1-associated protein 1) (BAP-1) (Membrane-associated guanylate kinase inverted 1) (MAGI-1) (Trinucleotide repeat-containing gene 19 protein) (WW domain-containing protein 3) (WWP3)	SADNTLERREK	0.993755	1317.66	3	1.3982	50.194	yes
Q9H165	B-cell lymphoma/leukemia 11A(BCL-11A) (B-cell CLL/lymphoma 11A) (COUP-TF-interacting protein 1) (Ecotropic viral integration site 9 protein homolog)(EVI-9) (Zinc finger protein 856)	MPFSVYSTLEK	0.993707	1300.64	3	0.53104	61.167	yes
Q9NQ66	1-phosphatidylinositol 4,5-bisphosphate phosphodiesterase beta-1 (EC 3.1.4.11) (PLC-154) (Phosphoinositide phospholipase C-beta-1) (Phospholipase C-I) (PLC-I) (Phospholipase C-beta-1) (PLC-beta-1)	ETELLDLSLVK	0.9937	1258.7	2	3.1974	45.158	yes
Q8NET4	Retrotransposon Gag-like protein 9 (Retrotransposon gag domain-containing protein 1) (Tumor antigen BJ-HCC-23)	APISGAMSMPLTR	0.99368	1330.67	3	4.5774	55.776	yes
O75064	DENN domain-containing protein 4B	SAFNKLASSMGK	0.993666	1239.63	3	3.1033	47.991	yes
P57075	Ubiquitin-associated and SH3 domain-containing protein A (Cbl-interacting protein 4) (CLIP4) (Suppressor of T-cell receptor signaling 2) (STS-2) (T-cell ubiquitin ligand 1) (TULA-1)	MYTFSLATDLNSRK	0.99366	1645.81	2	2.0777	45.28	yes
Q9UPN3	Microtubule-actin cross-linking factor 1, isoforms 1/2/3/5 (620 kDa actin-binding protein) (ABP620) (Actin cross-linking family protein 7) (Macrophin-1) (Trabeculin-alpha)	YTALHSKCTR	0.993655	1178.59	2	1.0449	66.267	yes
O75380	NADH dehydrogenase [ubiquinone] iron-sulfur protein 6, mitochondrial (Complex I-13kD-A) (CI-13kD-A) (NADH-ubiquinone oxidoreductase 13 kDa-A subunit)	VTHTGQVYDDK	0.993625	1261.59	2	5.2762	46.352	yes
Q96N77	Zinc finger protein 641	HLLTHQGQSPRNSWDR	0.993605	1930.95	3	1.1993	52.008	yes
P78509	Reelin (EC 3.4.21.-)	MPVCGSTGDALVFIEK	0.993559	1665.81	4	0.92642	55.724	yes
O00443	Phosphatidylinositol 4-phosphate 3-kinase C2 domain-containing subunit alpha (PI3K-C2-alpha) (PtdIns-3-kinase C2 subunit alpha) (EC 2.7.1.154) (Phosphoinositide 3-kinase-C2-alpha)	DSSLGLSK	0.993543	805.418	2	0.13308	40.067	yes
Q9H598	Vesicular inhibitory amino acid transporter (GABA and glycine transporter) (Solute carrier family 32 member 1) (Vesicular GABA transporter) (hVIAAT)	SQAKMSGMFAR	0.993543	1212.57	2	3.2478	51.726	yes
O95865	N(G),N(G)-dimethylarginine dimethylaminohydrolase 2 (DDAH-2) (Dimethylarginine dimethylaminohydrolase 2) (EC 3.5.3.18) (DDAHII) (Dimethylargininase-2) (Protein G6a) (S-phase protein)	GLCGMGGPRTVVAGSSDAAQK	0.99353	1960.95	3	0.34522	48.597	yes
P46020	Phosphorylase b kinase regulatory subunit alpha, skeletal muscle isoform (Phosphorylase kinase alpha M subunit)	TERTGIMQLK	0.993465	1175.63	3	1.4516	49.3	yes
Q5JTH9	RRP12-like protein	APAHHPAAISTAK	0.993438	1270.68	3	1.3342	56.551	yes
O15357	Phosphatidylinositol 3,4,5-trisphosphate 5-phosphatase 2 (EC 3.1.3.86) (Inositol polyphosphate phosphatase-like protein 1) (INPPL-1) (Protein 51C) (SH2 domain-containing inositol 5'-phosphatase 2) (SH2 domain-containing inositol phosphatase 2) (SHIP-2)	APSVSRGSQEPR	0.993429	1269.64	4	2.2966	46.063	yes
Q96M91	Cilia- and flagella-associated protein 53 (Coiled-coil domain-containing protein 11)	AKQETRTILQK	0.993397	1314.76	2	4.3589	73.499	yes
O75335	Liprin-alpha-4 (Protein tyrosine phosphatase receptor type f polypeptide-interacting protein alpha-4) (PTPRF-interacting protein alpha-4)	VTSGSMEALNLK	0.99334	1248.64	3	3.7762	40.616	yes
Q9UHP9	Small muscular protein (Stretch-responsive skeletal muscle protein)	MNMSKQPVSNVR	0.993313	1389.69	2	5.5447	50.354	yes
Q3KP66	Innate immunity activator protein	GLSKAAVSEELKWWHER	0.993239	2025.04	3	3.1837	49.595	yes
O60885	Bromodomain-containing protein 4 (Protein HUNK1)	TPMDMGTIKKR	0.993237	1276.66	2	2.8014	42.718	yes
Q15048	Leucine-rich repeat-containing protein 14	ELSMGSSLLSGR	0.993231	1235.62	2	1.0786	55.721	yes
Q8IVG5	Sterile alpha motif domain-containing protein 9-like (SAM domain-containing protein 9-like)	MSKQVSLPEMIK	0.993226	1389.74	3	0.25201	42.976	yes
Q6ICG6	Uncharacterized protein KIAA0930	HPMDSKGEESK	0.993159	1243.55	3	5.0526	42.426	yes
Q9NP59	Solute carrier family 40 member 1 (Ferroportin-1) (Iron-regulated transporter 1)	DTEPKPLEGTHLMGVK	0.993152	1750.89	3	3.8504	45.992	yes
Q9H8W3	Protein FAM204A	HSEQKSTTSR	0.993129	1159.56	3	3.9198	42.336	yes
Q8TBB5	Kelch domain-containing protein 4	STGGPSGR	0.993018	717.341	3	1.8257	47.574	yes
Q9P2E9	Ribosome-binding protein 1 (180 kDa ribosome receptor homolog) (RRp) (ES/130-related protein) (Ribosome receptor protein)	KTESASVQGR	0.992992	1061.55	3	0.11436	52.576	yes
Q9C099	Leucine-rich repeat and coiled-coil domain-containing protein 1 (Centrosomal leucine-rich repeat and coiled-coil domain-containing protein)	TLEKTLEKMER	0.992967	1376.73	3	3.1372	58.132	yes
Q14185	Dedicator of cytokinesis protein 1 (180 kDa protein downstream of CRK) (DOCK180)	MHSRSQDKLDK	0.992925	1343.66	3	2.7504	42.718	yes
P21397	Amine oxidase [flavin-containing] A (EC 1.4.3.4) (Monoamine oxidase type A) (MAO-A)	EIPTDAPWEAQHADKWDKMTMK	0.992919	2627.21	4	1.6905	46.494	yes
P26196	Probable ATP-dependent RNA helicase DDX6 (EC 3.6.4.13) (ATP-dependent RNA helicase p54) (DEAD box protein 6) (Oncogene RCK)	LQINQSIIFCNSSQR	0.99289	1749.88	4	5.6946	41.577	yes
P61571	Endogenous retrovirus group K member 21 Rec protein (HERV-K_12q14.1 provirus Rec protein)	MVTSEQMKLPSTKK	0.992715	1606.84	4	0.20658	45.28	yes
P17010	Zinc finger X-chromosomal protein	CTDCDYTTNKK	0.99266	1290.52	3	4.8655	47.302	yes
O60346	PH domain leucine-rich repeat-containing protein phosphatase 1 (EC 3.1.3.16) (Pleckstrin homology domain-containing family E member 1) (PH domain-containing family E member 1) (Suprachiasmatic nucleus circadian oscillatory protein) (hSCOP)	LCMSGNCVETLR	0.992628	1324.59	3	4.3846	55.724	yes
Q86VF7	Nebulin-related-anchoring protein (N-RAP)	GSFPAMITPAYQRAK	0.992606	1636.84	3	4.9796	45.992	yes
Q9NRH3	Tubulin gamma-2 chain (Gamma-2-tubulin)	KSPYLPSAHR	0.992471	1154.62	2	5.6486	57.785	yes
Q9HAU5	Regulator of nonsense transcripts 2 (Nonsense mRNA reducing factor 2) (Up-frameshift suppressor 2 homolog) (hUpf2)	SCQNKESNKDDTK	0.992428	1495.66	2	1.3016	44.426	yes
P14618	Pyruvate kinase PKM (EC 2.7.1.40) (Cytosolic thyroid hormone-binding protein) (CTHBP) (Opa-interacting protein 3) (OIP-3) (Pyruvate kinase 2/3) (Pyruvate kinase muscle isozyme) (Thyroid hormone-binding protein 1) (THBP1) (Tumor M2-PK) (p58)	TGLIKGSGTAEVELK	0.992401	1501.84	2	2.4867	46.543	yes
Q9H8G1	Zinc finger protein 430	MENLKSGVYPLKEASGCPGADR	0.99238	2321.11	4	0.059799	45.347	yes
Q6ZU52	Uncharacterized protein KIAA0408	TSEEDSK	0.992379	794.329	2	1.8027	46.37	yes
Q96C00	Zinc finger and BTB domain-containing protein 9	GQGWATAHWTYK	0.992378	1404.66	2	2.4791	47.971	yes
Q9HAY6	Beta,beta-carotene 15,15'-dioxygenase (EC 1.13.11.63) (Beta-carotene dioxygenase 1) (Beta-carotene oxygenase 1)	RMSWASCLAFHR	0.992191	1463.69	2	0.091282	43.897	yes
Q9NU02	Ankyrin repeat and EF-hand domain-containing protein 1 (Ankyrin repeat domain-containing protein 5)	TPPILKTEGPEIK	0.992167	1421.81	2	0.68706	46.88	yes
Q06187	Tyrosine-protein kinase BTK (EC 2.7.10.2) (Agammaglobulinemia tyrosine kinase) (ATK) (B-cell progenitor kinase) (BPK) (Bruton tyrosine kinase)	ITCVETVVPEK	0.992147	1216.64	3	4.5709	49.298	yes
Q86T82	Ubiquitin carboxyl-terminal hydrolase 37 (Deubiquitinating enzyme 37) (Ubiquitin thioesterase 37) (Ubiquitin-specific-processing protease 37)	LMLTLQDNSFLSIDK	0.992131	1736.9	4	5.0145	40.941	yes
Q6SA08	Testis-specific serine/threonine-protein kinase 4 (TSK-4) (TSSK-4) (Testis-specific kinase 4) (EC 2.7.11.1) (Serine/threonine-protein kinase 22E)	QATKRATILDIIK	0.992037	1469.89	2	3.9688	46.063	yes
O95677	Eyes absent homolog 4 (EC 3.1.3.48)	SSGSKSRGR	0.992004	920.479	2	2.7257	63.216	yes
P14859	POU domain, class 2, transcription factor 1 (NF-A1) (Octamer-binding protein 1) (Oct-1) (Octamer-binding transcription factor 1) (OTF-1)	EKRINPPSSGGTSSSPIK	0.991987	1840.96	4	5.8127	47.548	yes
P49796	Regulator of G-protein signaling 3 (RGP3) (RGS3)	VKSQSKMASK	0.991883	1092.6	2	1.2917	58.246	yes
Q7Z478	ATP-dependent RNA helicase DHX29 (EC 3.6.4.13) (DEAH box protein 29) (Nucleic acid helicase DDXx)	KKPPVATEGESALNFNLFEK	0.991847	2218.16	3	1.1817	43.794	yes
O95243	Methyl-CpG-binding domain protein 4 (EC 3.2.2.-) (Methyl-CpG-binding endonuclease 1) (Methyl-CpG-binding protein MBD4) (Mismatch-specific DNA N-glycosylase)	GSEMDNNCSPTRK	0.991842	1437.6	3	1.5635	41.695	yes
P46013	Proliferation marker protein Ki-67 (Antigen identified by monoclonal antibody Ki-67) (Antigen KI-67) (Antigen Ki67)	GHTEESMTNDKTAK	0.991839	1547.69	4	1.6183	44.367	yes
A2A3N6	Putative PIP5K1A and PSMD4-like protein(PIP5K1A-PSMD4)	ASEVPYASGMPIKK	0.991838	1476.76	2	1.6222	48.277	yes
P51610	Host cell factor 1 (HCF) (HCF-1) (C1 factor) (CFF) (VCAF) (VP16 accessory protein) [Cleaved into: HCF N-terminal chain 1; HCF N-terminal chain 2; HCF N-terminal chain 3; HCF N-terminal chain 4; HCF N-terminal chain 5; HCF N-terminal chain 6; HCF C-terminal chain 1; HCF C-terminal chain 2; HCF C-terminal chain 3; HCF C-terminal chain 4; HCF C-terminal chain 5; HCF C-terminal chain 6]	TAAAQVGTSVSSATNTSTRPIITVHK	0.991784	2597.38	4;5	0.00033145	78.268	yes
Q6ZU65	Ubinuclein-2	EVSRAEPPMSLQR	0.991764	1498.76	3	1.4037	40.475	yes
Q9BVI0	PHD finger protein 20 (Glioma-expressed antigen 2) (Hepatocellular carcinoma-associated antigen 58) (Novel zinc finger protein) (Transcription factor TZP)	MSILQSR	0.991753	833.443	3	4.8267	47.849	yes
Q33E94	Transcription factor RFX4 (Regulatory factor X 4) (Testis development protein NYD-SP10)	GAAWVSETGKKEVSK	0.99174	1575.83	2	4.6015	43.594	yes
P28290	Sperm-specific antigen 2 (Cleavage signal-1 protein) (CS-1) (Ki-ras-induced actin-interacting protein)	RVLHDIRNSLQNLSQYPMMR	0.991734	2470.27	3	1.3877	44.998	yes
O76027	Annexin A9 (Annexin XXXI) (Annexin-31) (Annexin-9) (Pemphaxin)	SLQAALSGNLER	0.99172	1257.67	4	3.5147	42.031	yes
Q9UPQ9	Trinucleotide repeat-containing gene 6B protein	EREDSWKGASVQK	0.991677	1518.74	3	0.079751	46.069	yes
Q9P1Y6	PHD and RING finger domain-containing protein 1	SSATRSKK	0.991633	863.482	4	1.002	52.716	yes
Q8WZ42	Titin (Connectin) (Rhabdomyosarcoma antigen MU-RMS-40.14)	VHIVIDKQSHMLLIEDMTK	0.991592	2249.19	3	2.102	45.618	yes
Q8IUW5	RELT-like protein 1	RSLMSVSGAETVNGEVPATPVKR	0.991517	2384.25	3	4.6105	57.045	yes
Q9Y6N5	Sulfide:quinone oxidoreductase, mitochondrial (SQOR) (EC 1.8.5.-) (Sulfide dehydrogenase-like) (Sulfide quinone oxidoreductase)	TVEKTWK	0.991487	890.486	2	3.8191	44.692	yes
P35663	Cylicin-1 (Cylicin I) (Multiple-band polypeptide I)	KSSDAESEDSKDAK	0.991422	1495.66	3	5.8115	41.996	yes
Q86TV6	Tetratricopeptide repeat protein 7B (TPR repeat protein 7B) (Tetratricopeptide repeat protein 7-like-1) (TPR repeat protein 7-like-1)	HMLQIWKSCYNLTNPSDSGR	0.991394	2349.1	3	4.4822	42.78	yes
Q9UQB8	Brain-specific angiogenesis inhibitor 1-associated protein 2 (BAI-associated protein 2) (BAI1-associated protein 2) (Protein BAP2) (Fas ligand-associated factor 3) (FLAF3) (Insulin receptor substrate p53/p58) (IRS-58) (IRSp53/58) (Insulin receptor substrate protein of 53 kDa) (IRSp53) (Insulin receptor substrate p53)	MGELASESQGSK	0.991387	1222.55	3	0.59868	46.352	yes
Q2KHM9	Protein moonraker (MNR) (OFD1- and FOPNL-interacting protein)	KSWAMSK	0.991377	836.421	2	0.29486	42.599	yes
Q5T890	DNA excision repair protein ERCC-6-like 2 (DNA repair and recombination protein RAD26-like)	LPSHNKKNSTFIPR	0.991369	1637.9	3	0.70707	42.785	yes
O15297	Protein phosphatase 1D (EC 3.1.3.16) (Protein phosphatase 2C isoform delta) (PP2C-delta) (Protein phosphatase magnesium-dependent 1 delta) (p53-induced protein phosphatase 1)	TLEESNSGPLMK	0.991316	1304.63	2	3.5339	46.844	yes
P22033	Methylmalonyl-CoA mutase, mitochondrial(MCM) (Methylmalonyl-CoA isomerase)	NTYIFPPEPSMK	0.991229	1422.69	2	0.19404	45.653	yes
Q7L2E3	Putative ATP-dependent RNA helicase DHX30 (EC 3.6.4.13) (DEAH box protein 30)	NNEPLTHAMYNLASLR	0.991217	1842.9	3	4.9557	50.102	yes
O43633	Charged multivesicular body protein 2a (Chromatin-modifying protein 2a) (CHMP2a) (Putative breast adenocarcinoma marker BC-2) (Vacuolar protein sorting-associated protein 2-1) (Vps2-1) (hVps2-1)	GVTKAMGTMNRQLK	0.99119	1533.81	3	5.3737	53.448	yes
P52742	Zinc finger protein 135 (Zinc finger protein 61) (Zinc finger protein 78-like 1)	GFRNSSALTKHQR	0.991135	1500.79	3	4.3243	48.948	yes
Q5SWA1	Protein phosphatase 1 regulatory subunit 15B	MEPGTGGSRK	0.991128	1018.49	2	4.654	42.031	yes
Q8N2Y8	Iporin (Interacting protein of Rab1) (RUN and SH3 domain-containing protein 2)	VTSFAELAKGR	0.991122	1177.65	2	2.678	47.228	yes
Q96MP5	Zinc finger SWIM domain-containing protein 3	CSFILRDCVSVR	0.991063	1396.7	3;4	5.5444	47.712	yes
P35663	Cylicin-1 (Cylicin I) (Multiple-band polypeptide I)	NYSLKYTKYTK	0.991036	1407.74	3	2.1559	41.399	yes
Q6UB35	Monofunctional C1-tetrahydrofolate synthase, mitochondrial (EC 6.3.4.3) (Formyltetrahydrofolate synthetase)	GSMTMSIQWKTR	0.990983	1424.69	4	0.019696	49.934	yes
Q7Z2W4	Zinc finger CCCH-type antiviral protein 1 (ADP-ribosyltransferase diphtheria toxin-like 13) (ARTD13) (Zinc finger CCCH domain-containing protein 2) (Zinc finger antiviral protein) (ZAP)	KTVFSPTLPAAR	0.990956	1286.73	3	0.86318	43.502	yes
Q96GM8	Target of EGR1 protein 1	SQFSRSSKAHNQK	0.990895	1503.75	3	1.6521	42.843	yes
Q6TGC4	Protein-arginine deiminase type-6 (EC 3.5.3.15) (Peptidyl arginine deiminase-like protein) (Peptidylarginine deiminase VI) (hPADVI) (Protein-arginine deiminase type VI)	YSLSPGIGYMIQDTEDHK	0.990801	2052.95	3	1.3978	48.216	yes
Q8WTR2	Dual specificity protein phosphatase 19 (Dual specificity phosphatase TS-DSP1) (Low molecular weight dual specificity phosphatase 3)(LMW-DSP3) (Protein phosphatase SKRP1） （Stress-activated protein kinase pathway-regulating phosphatase 1)(SAPK pathway-regulating phosphatase 1)	MYSLNQEIKAFSR	0.990764	1585.79	3	0.73249	42.843	yes
Q9NR20	Dual specificity tyrosine-phosphorylation-regulated kinase 4 (EC 2.7.12.1)	TQDPKAEEKSPK	0.990728	1356.69	3	2.6791	46.156	yes
P49757	Protein numb homolog (h-Numb) (Protein S171)	MSPFKRQLSLR	0.990723	1361.76	3	0.11466	50.222	yes
Q8N9R6	CMT1A duplicated region transcript 4 protein	LIEKSKTR	0.9906	973.592	3	3.4416	45.081	yes
O15144	Actin-related protein 2/3 complex subunit 2 (Arp2/3 complex 34 kDa subunit) (p34-ARC)	DRVTVVFSTVFK	0.99053	1396.77	3	2.8268	51.009	yes
Q15506	Sperm surface protein Sp17 (Cancer/testis antigen 22) (CT22) (Sp17-1) (Sperm autoantigenic protein 17) (Sperm protein 17)	SIPFSNTHYR	0.990526	1220.59	2;3	0.28256	45.158	yes
Q8N0U7	Uncharacterized protein C1orf87	MALRTTNGR	0.990525	1018.53	2	5.9296	55.461	yes
P81133	Single-minded homolog 1 (Class E basic helix-loop-helix protein 14) (bHLHe14)	YRTEQYQSSPHEPSK	0.990479	1835.84	3	3.3591	47.774	yes
Q13465	MDS1 and EVI1 complex locus protein MDS1 (Myelodysplasia syndrome 1 protein) (Myelodysplasia syndrome-associated protein 1)	VSVHSWLYLGKR	0.990295	1443.8	3	3.3999	52.247	yes
Q14997	Proteasome activator complex subunit 4 (Proteasome activator PA200)	QYETIGLDFTIPK	0.990269	1523.79	3	3.8776	42.425	yes
P31944	Caspase-14 (CASP-14) (EC 3.4.22.-) [Cleaved into: Caspase-14 subunit p17, mature form; Caspase-14 subunit p10, mature form; Caspase-14 subunit p20, intermediate form; Caspase-14 subunit p8, intermediate form]	MSNPRSLEEEK	0.990259	1318.62	2	3.1406	51.286	yes
P12429	Annexin A3 (35-alpha calcimedin) (Annexin III) (Annexin-3) (Inositol 1,2-cyclic phosphate 2-phosphohydrolase) (Lipocortin III) (Placental anticoagulant protein III) (PAP-III)	QMKDISQAYYTVYKK	0.990202	1864.94	3	4.196	42.317	yes
Q14919	Dr1-associated corepressor (Dr1-associated protein 1) (Negative cofactor 2-alpha) (NC2-alpha)	NAKTMTTSHLK	0.9902	1230.64	2	3.7529	49.466	yes
Q96HQ2	CDKN2AIP N-terminal-like protein (CDKN2A-interacting protein N-terminal-like protein)	SYSESEKQWK	0.990086	1270.58	2;3	0.73515	64.654	yes
Q8TDR0	TRAF3-interacting protein 1 (Interleukin-13 receptor alpha 1-binding protein 1) (Intraflagellar transport protein 54 homolog) (Microtubule-interacting protein associated with TRAF3) (MIP-T3)	SLTTKTSKR	0.990064	1020.59	3	1.5609	66.692	yes
Q07343	cAMP-specific 3',5'-cyclic phosphodiesterase 4B (EC 3.1.4.53) (DPDE4) (PDE32)	KMVIDMVLATDMSK	0.989977	1580.8	3	0.83582	52.101	yes
Q9H4Q4	PR domain zinc finger protein 12 (EC 2.1.1.-) (PR domain-containing protein 12)	SNLRSHMR	0.989864	999.503	2	5.1333	52.937	yes
Q03188	Centromere protein C (CENP-C) (Centromere autoantigen C) (Centromere protein C 1) (CENP-C 1) (Interphase centromere complex protein 7)	STKYEMYSK	0.989864	1135.52	2	2.468	47.603	yes
P0CF97	Putative protein FAM200B	SADKLKTIPNDNTVSLR	0.989835	1871.01	3	0.063291	49.595	yes
Q03164	Histone-lysine N-methyltransferase 2A (Lysine N-methyltransferase 2A) (EC 2.1.1.43) (ALL-1) (CXXC-type zinc finger protein 7) (Myeloid/lymphoid or mixed-lineage leukemia) (Myeloid/lymphoid or mixed-lineage leukemia protein 1) (Trithorax-like protein) (Zinc finger protein HRX) [Cleaved into: MLL cleavage product N320 (N-terminal cleavage product of 320 kDa) (p320); MLL cleavage product C180 (C-ter…	HSTSSLSPQR	0.989832	1098.54	3	2.4141	48.602	yes
Q9Y618	Nuclear receptor corepressor 2 (N-CoR2) (CTG repeat protein 26) (SMAP270) (Silencing mediator of retinoic acid and thyroid hormone receptor) (SMRT) (T3 receptor-associating factor) (TRAC) (Thyroid-, retinoic-acid-receptor-associated corepressor)	LQEGSLSSSK	0.989812	1034.52	3	3.56	65.719	yes
Q1RMZ1	S-adenosylmethionine sensor upstream of mTORC1 (Probable methyltransferase BMT2 homolog) (EC 2.1.1.-)	SWKIAIESLGFK	0.989785	1377.77	2	1.7503	63.624	yes
Q9HCE3	Zinc finger protein 532	GSPSSPAGSTPAIPK	0.989784	1352.69	3	1.7662	43.761	yes
Q96A44	SPRY domain-containing SOCS box protein 4 (SSB-4)	LTFHRHPVAQSTDGIRGK	0.989771	2019.08	3	2.1026	43.164	yes
Q8IVM7	Putative uncharacterized protein encoded by LINC00346	LVAALDIHGLSFSLRFCGSR	0.98977	2161.15	3	0.073899	48.288	yes
Q9Y608	Leucine-rich repeat flightless-interacting protein 2 (LRR FLII-interacting protein 2)	ESLSEVEEK	0.989705	1048.49	2	2.8249	62.546	yes
O14974	Protein phosphatase 1 regulatory subunit 12A (Myosin phosphatase-targeting subunit 1)(Myosin phosphatase target subunit 1)（Protein phosphatase myosin-binding subunit)	KFPTTATKISPK	0.989672	1317.77	4	0.25241	46.352	yes
Q99612	Krueppel-like factor 6 (B-cell-derived protein 1) (Core promoter element-binding protein) (GC-rich sites-binding factor GBF) (Proto-oncogene BCD1) (Suppressor of tumorigenicity 12 protein) (Transcription factor Zf9)	CFSRSDHLALHMK	0.989557	1543.74	3	3.1339	56.087	yes
Q8N4P2	Tetratricopeptide repeat protein 30B (TPR repeat protein 30B)	RCFLSLLENMSK	0.989555	1439.73	2	4.157	44.639	yes
Q9UII4	E3 ISG15--protein ligase HERC5 (EC 2.3.2.-) (Cyclin-E-binding protein 1) (HECT domain and RCC1-like domain-containing protein 5)	ALTCFSVLFLPK	0.989454	1337.74	3	1.4011	50.791	yes
Q8NFF5	FAD synthase (EC 2.7.7.2) (FAD pyrophosphorylase) (FMN adenylyltransferase) (Flavin adenine dinucleotide synthase) [Includes: Molybdenum cofactor biosynthesis protein-like region; FAD synthase region]	LAESGSSLGKK	0.989454	1075.59	2	3.7538	57.149	yes
Q8NHU2	Cilia- and flagella-associated protein 61	MSVLTSPR	0.989438	889.469	2	2.6738	47.869	yes
Q96KR1	Zinc finger RNA-binding protein (hZFR) (M-phase phosphoprotein homolog)	AGYSQGATQYTQAQQTR	0.989348	1857.86	2;3;4	0.00060805	206.81	yes
Q9Y613	FH1/FH2 domain-containing protein 1 (Formin homolog overexpressed in spleen 1) (FHOS) (Formin homology 2 domain-containing protein 1)	DGIEKLLTMMPTEEER	0.989276	1890.91	3	5.2259	51.771	yes
Q14118	Dystroglycan (Dystrophin-associated glycoprotein 1) [Cleaved into: Alpha-dystroglycan (Alpha-DG); Beta-dystroglycan (Beta-DG)]	GSRPKNMTPYR	0.989218	1305.66	3	4.5787	48.981	yes
Q9NTW7	Zinc finger protein 64 homolog, isoforms 3 and 4 (Zfp-64) (Zinc finger protein 338)	CTMKANLKSHIR	0.989166	1400.74	3	3.2021	49.298	yes
Q8IXM3	39S ribosomal protein L41, mitochondrial (L41mt) (MRP-L41) (39S ribosomal protein L27 homolog) (Bcl-2-interacting mitochondrial ribosomal protein L41) (Cell proliferation-inducing gene 3 protein) (MRP-L27 homolog) (Mitochondrial large ribosomal subunit protein mL41)	MSKWTSKR	0.989158	1022.53	2	5.0438	43.808	yes
Q14919	Dr1-associated corepressor (Dr1-associated protein 1) (Negative cofactor 2-alpha) (NC2-alpha)	KNGGMGTKSK	0.9891	1006.52	2	1.1253	68.557	yes
Q6NUN0	Acyl-coenzyme A synthetase ACSM5, mitochondrial (EC 6.2.1.2) (Acyl-CoA synthetase medium-chain family member 5)	IVATWEAISLGR	0.989082	1314.73	4	5.0646	54.871	yes
P46821	Microtubule-associated protein 1B (MAP-1B) [Cleaved into: MAP1B heavy chain; MAP1 light chain LC1]	KPGTKTKSSSPVK	0.989007	1343.78	2	5.7571	48.948	yes
Q9NP08	Homeobox protein HMX1 (Homeobox protein H6)	PDELTEPGRATPAR	0.988915	1508.76	3	1.1099	52.821	yes
Q9UKL3	CASP8-associated protein 2 (FLICE-associated huge protein)	SHYQVGEGSSNEDSRR	0.988843	1806.79	3	4.8296	51.03	yes
Q9NQ03	Transcriptional repressor scratch 2 (Scratch homolog 2 zinc finger protein)	AHMQTHSAFK	0.988839	1156.54	3	1.9175	47.706	yes
Q92625	Ankyrin repeat and SAM domain-containing protein 1A (Odin)	SESLSNCSIGKK	0.988803	1251.61	2	1.2512	59.198	yes
Q04637	Eukaryotic translation initiation factor 4 gamma 1 (eIF-4-gamma 1) (eIF-4G 1) (eIF-4G1) (p220)	AQPPSSAASR	0.988798	970.483	2	0.076831	83.137	yes
Q9NWH9	SAFB-like transcription modulator (Modulator of estrogen-induced transcription)	EAGPNPSRPTSWKSEGSMSTDK	0.988773	2348.07	3	0.78051	47.726	yes
Q15700	Disks large homolog 2 (Channel-associated protein of synapse-110) (Chapsyn-110) (Postsynaptic density protein PSD-93)	FPFYKNKEQSEQETSDPER	0.988738	2358.08	3	2.1815	46.701	yes
P29536	Leiomodin-1 (64 kDa autoantigen 1D) (64 kDa autoantigen 1D3) (64 kDa autoantigen D1) (Leiomodin, muscle form) (Smooth muscle leiomodin) (SM-Lmod) (Thyroid-associated ophthalmopathy autoantigen)	LMQREMSMDESKQVETK	0.988737	2068.96	3	3.5486	54.09	yes
P81133	Single-minded homolog 1 (Class E basic helix-loop-helix protein 14) (bHLHe14)	SSLILAK	0.988732	730.459	2	4.0605	51.787	yes
Q8NDI1	EH domain-binding protein 1	KTSLSPTSKLGYSYSR	0.988583	1773.93	3	2.4555	43.69	yes
P49759	Dual specificity protein kinase CLK1 (EC 2.7.12.1) (CDC-like kinase 1)	RSHSSAQENKR	0.988576	1298.64	5	4.4141	41.689	yes
P51610	Host cell factor 1 (HCF) (HCF-1) (C1 factor) (CFF) (VCAF) (VP16 accessory protein) [Cleaved into: HCF N-terminal chain 1; HCF N-terminal chain 2; HCF N-terminal chain 3; HCF N-terminal chain 4; HCF N-terminal chain 5; HCF N-terminal chain 6; HCF C-terminal chain 1; HCF C-terminal chain 2; HCF C-terminal chain 3; HCF C-terminal chain 4; HCF C-terminal chain 5; HCF C-terminal chain 6]	HSHAVSTAAMTR	0.988561	1267.61	2;4;5	0.0095502	95.554	yes
Q7Z6M1	Rab9 effector protein with kelch motifs (40 kDa Rab9 effector protein) (p40)	LDHSMCIIPWPVTCASEK	0.988534	2028.95	3	5.1094	43.164	yes
Q08378	Golgin subfamily A member 3 (Golgi complex-associated protein of 170 kDa) (GCP170) (Golgin-160)	KSQGTSAEGSVRK	0.988446	1333.69	3	3.416	55.776	yes
Q07617	Sperm-associated antigen 1 (HSD-3.8) (Infertility-related sperm protein Spag-1)	SSRSPEDPEK	0.988411	1130.52	4	5.9954	45.598	yes
A8K979	ERI1 exoribonuclease 2 (EC 3.1.-.-) (Exonuclease domain-containing protein 1)	SGKMTPPLCKCGR	0.988397	1376.67	3	5.6477	52.495	yes
Q14896	Myosin-binding protein C, cardiac-type (Cardiac MyBP-C) (C-protein, cardiac muscle isoform)	KTMEWFTVLEHYR	0.988316	1738.85	3	1.9949	54.023	yes
Q96DB5	Regulator of microtubule dynamics protein 1 (RMD-1) (hRMD-1) (Protein FAM82B)	LPAGTSGSRGHCGPCR	0.988242	1554.71	3	3.1093	49.149	yes
Q9Y2B4	TP53-target gene 5 protein (TP53-inducible gene 5 protein)	NSRVSKMQDEK	0.988231	1320.65	2	1.3453	45.653	yes
Q96KX1	Uncharacterized protein C4orf36	TWSTNLANIK	0.988223	1146.6	3	5.8086	49.418	yes
A6NGG3	Putative uncharacterized protein C9orf92	MQPSPTGKGGK	0.98819	1086.55	2	4.3573	43.761	yes
O95999	B-cell lymphoma/leukemia 10 (B-cell CLL/lymphoma 10) (Bcl-10) (CARD-containing molecule enhancing NF-kappa-B) (CARD-like apoptotic protein) (hCLAP) (CED-3/ICH-1 prodomain homologous E10-like regulator) (CIPER) (Cellular homolog of vCARMEN) (cCARMEN) (Cellular-E10) (c-E10) (Mammalian CARD-containing adapter molecule E10) (mE10)	MEPTAPSLTEEDLTEVK	0.988087	1888.9	4	3.9751	46.494	yes
Q5BJF6	Outer dense fiber protein 2 (Cenexin) (Outer dense fiber of sperm tails protein 2)	FPSCGKNGVTSLTQK	0.988082	1565.79	2	2.3529	43.798	yes
Q9Y2K7	Lysine-specific demethylase 2A (EC 1.14.11.27) (CXXC-type zinc finger protein 8) (F-box and leucine-rich repeat protein 11) (F-box protein FBL7) (F-box protein Lilina) (F-box/LRR-repeat protein 11) (JmjC domain-containing histone demethylation protein 1A) ([Histone-H3]-lysine-36 demethylase 1A)	KTLAGDSSSDCSR	0.988055	1325.59	3	5.4831	56.936	yes
Q9NYF3	Protein FAM53C	RFSLSPSLGPQASR	0.987883	1501.8	3	3.282	41.996	yes
Q99607	ETS-related transcription factor Elf-4 (E74-like factor 4) (Myeloid Elf-1-like factor)	TSGTTAAPR	0.987821	860.435	2	0.19554	50.805	yes
Q9BX63	Fanconi anemia group J protein (Protein FACJ) (EC 3.6.4.13) (ATP-dependent RNA helicase BRIP1) (BRCA1-associated C-terminal helicase 1) (BRCA1-interacting protein C-terminal helicase 1) (BRCA1-interacting protein 1)	MESKTVLPFTDK	0.987717	1394.71	3	3.7688	42.031	yes
Q15058	Kinesin-like protein KIF14	KTADMPLTPNPVGR	0.987716	1495.78	3	4.0344	53.448	yes
Q86W11	Zinc finger and SCAN domain-containing protein 30 (ZNF-WYM) (Zinc finger protein 397 opposite strand) (Zinc finger protein 397OS)	TETQESQAFQERDGRMVAGK	0.987607	2267.06	3	4.3433	55.688	yes
Q9H4Q4	PR domain zinc finger protein 12 (EC 2.1.1.-) (PR domain-containing protein 12)	SHHASPK	0.987504	762.377	2	1.9596	57.281	yes
P42858	Huntingtin (Huntington disease protein) (HD protein)	SGMFRRITAAATR	0.987466	1436.77	3	2.7277	52.576	yes
O00203	AP-3 complex subunit beta-1 (Adaptor protein complex AP-3 subunit beta-1) (Adaptor-related protein complex 3 subunit beta-1) (Beta-3A-adaptin) (Clathrin assembly protein complex 3 beta-1 large chain)	SFTSEDDLVK	0.987462	1139.53	3	2.1398	48.091	yes
Q8TC07	TBC1 domain family member 15 (GTPase-activating protein RAB7)(GAP for RAB7)(Rab7-GAP)	KDPYTATMIGFSK	0.986989	1457.72	2	2.444	48.729	yes
Q13613	Myotubularin-related protein 1 (Phosphatidylinositol-3,5-bisphosphate 3-phosphatase) (EC 3.1.3.95) (Phosphatidylinositol-3-phosphate phosphatase) (EC 3.1.3.64)	SPIFLQFVDCVWQMTR	0.986914	1968.96	3	1.5857	42.068	yes
Q6ZRS2	Helicase SRCAP (EC 3.6.4.-) (Domino homolog 2) (Snf2-related CBP activator)	AETQGANHTPVISAHQTR	0.986905	1916.95	3;4	0.026539	102.16	yes
O43660	Pleiotropic regulator 1	SVRAVVLHPRHYTFASGSPDNIK	0.986887	2550.35	4	2.78	45.069	yes
Q9NSD4	Zinc finger protein 275	RSSELTKHR	0.986756	1112.61	3	1.1458	61.691	yes
Q9H093	NUAK family SNF1-like kinase 2 (EC 2.7.11.1) (Omphalocele kinase 2) (SNF1/AMP kinase-related kinase) (SNARK)	VCSFFKQHAPGGGSTTPGLER	0.986698	2175.05	3	4.273	40.968	yes
P23921	Ribonucleoside-diphosphate reductase large subunit (EC 1.17.4.1) (Ribonucleoside-diphosphate reductase subunit M1) (Ribonucleotide reductase large subunit)	TVWEISQKTVLK	0.986638	1430.81	3	5.8015	47.622	yes
Q5VST9	Obscurin (EC 2.7.11.1) (Obscurin-RhoGEF) (Obscurin-myosin light chain kinase) (Obscurin-MLCK)	SRWQRSLMSYK	0.986618	1440.73	3	4.0341	68.171	yes
Q9Y2Y4	Zinc finger and BTB domain-containing protein 32 (FANCC-interacting protein) (Fanconi anemia zinc finger protein) (Testis zinc finger protein) (Zinc finger protein 538)	DFSAMTKHLR	0.986608	1204.6	3	1.5687	40.994	yes
P78332	RNA-binding protein 6 (Lung cancer antigen NY-LU-12) (Protein G16) (RNA-binding motif protein 6) (RNA-binding protein DEF-3)	TGPSEEKPSR	0.986604	1086.53	3	4.1526	55.084	yes
O94763	Unconventional prefoldin RPB5 interactor 1 (Protein NNX3) (Protein phosphatase 1 regulatory subunit 19) (RNA polymerase II subunit 5-mediating protein) (RPB5-mediating protein)	VRINTGKNTTLK	0.986596	1343.79	2	2.2736	54.898	yes
A7E2V4	Zinc finger SWIM domain-containing protein 8	ALPSRPGASRSGGLEESR	0.986539	1825.94	4	2.7426	46.156	yes
Q9P1Y5	Calmodulin-regulated spectrin-associated protein 3 (Protein Nezha)	MTSFAERKK	0.986474	1096.57	3	4.0379	58.981	yes
Q9BWT6	Meiotic nuclear division protein 1 homolog	IGRCETEERTR	0.986284	1348.65	3	5.9716	51.135	yes
O94886	CSC1-like protein 1 (Transmembrane protein 63A)	SGENQIMMTK	0.986123	1137.52	2	1.4747	56.087	yes
Q9Y450	HBS1-like protein (ERFS)	TMHKYEQESKK	0.986084	1407.68	2	5.3398	40.727	yes
Q9BXT4	Tudor domain-containing protein 1 (Cancer/testis antigen 41.1) (CT41.1)	ATKPLLMEQYCSIK	0.986079	1623.84	3	4.7471	48.623	yes
P11532	Dystrophin	SLSEVKSEVEMVIK	0.985978	1576.84	4	3.1294	41.912	yes
Q5H9F3	BCL-6 corepressor-like protein 1 (BCoR-L1) (BCoR-like protein 1)	CKTKHMATVSEEAK	0.985919	1561.76	3	0.7052	52.862	yes
Q8WZ42	Titin (EC 2.7.11.1) (Connectin) (Rhabdomyosarcoma antigen MU-RMS-40.14)	DAAYPPGPPSNPHVTDTTK	0.985911	1963.93	3	2.0767	42.059	yes
Q9NVR7	TBCC domain-containing protein 1	TFSFYKLETWLR	0.985758	1589.82	3	5.156	57.885	yes
Q6PIJ6	F-box only protein 38 (Modulator of KLF7 activity homolog) (MoKA)	NLVGVTMTNCGITDLVLKDCPK	0.985694	2333.18	5	5.5398	45.347	yes
Q9BWK5	Cell cycle regulator of non-homologous end joining (Cell cycle regulator of NHEJ) (Modulator of retrovirus infection homolog)	ETLQSETK	0.985683	934.461	2	3.4317	63.565	yes
Q8N9F8	Zinc finger protein 454	VFSKSSTLNK	0.985628	1109.61	3	1.3453	61.78	yes
Q9Y5B6	PAX3- and PAX7-binding protein 1 (GC-rich sequence DNA-binding factor 1)	LDSMKELHKTNR	0.985433	1470.76	2	0.68351	46.069	yes
Q9UQ80	Proliferation-associated protein 2G4 (Cell cycle protein p38-2G4 homolog) (hG4-1) (ErbB3-binding protein 1)	GIAFPTSISVNNCVCHFSPLK	0.9853	2233.1	4	1.4512	41.323	yes
Q08499	cAMP-specific 3',5'-cyclic phosphodiesterase 4D (EC 3.1.4.53) (DPDE3) (PDE43)	HSVSEMASNKFKR	0.985252	1519.76	3	0.3261	56.936	yes
Q7Z4L5	Tetratricopeptide repeat protein 21B (TPR repeat protein 21B) (Intraflagellar transport 139 homolog)	MGEIADAIKTLHMAMSLPGMK	0.985222	2244.11	4	4.9979	47.082	yes
Q86XS8	E3 ubiquitin-protein ligase RNF130 (EC 2.3.2.27) (Goliath homolog) (H-Goliath) (RING finger protein 130) (RING-type E3 ubiquitin transferase RNF130)	NISVQMTIAVGTR	0.985073	1388.74	2	3.5658	41.684	yes
Q969U6	F-box/WD repeat-containing protein 5 (F-box and WD-40 domain-containing protein 5)	AHRAYTPNDECFFIFLDVSR	0.985032	2400.13	4	3.9621	42.813	yes
Q96CV9	Optineurin (E3-14.7K-interacting protein) (FIP-2) (Huntingtin yeast partner L) (Huntingtin-interacting protein 7) (HIP-7) (Huntingtin-interacting protein L) (NEMO-related protein) (Optic neuropathy-inducing protein) (Transcription factor IIIA-interacting protein) (TFIIIA-IntP)	TVSTGTALSKYR	0.984955	1282.69	3	4.7081	46.159	yes
Q96IK5	Germ cell-less protein-like 1	QLLTETDVWFSKQRK	0.984793	1878	3	5.2325	43.164	yes
Q08495	Dematin (Dematin actin-binding protein) (Erythrocyte membrane protein band 4.9)	SPGIISQASAPR	0.984776	1182.64	4	0.56718	58.817	yes
Q9Y2F5	Little elongation complex subunit 1 (Interactor of little elongator complex ELL subunit 1)	TVLSKMMGSPK	0.984754	1177.62	3	2.4849	55.314	yes
Q9UFE4	Coiled-coil domain-containing protein 39	LKEITEKTMSVEEK	0.98448	1663.87	3	3.2744	40.751	yes
Q9BSH4	Translational activator of cytochrome c oxidase 1 (Coiled-coil domain-containing protein 44) (Translational activator of mitochondrially-encoded cytochrome c oxidase I)	MSAWAAASLSR	0.984465	1149.56	3	2.5459	40.727	yes
Q9Y6Q9	Nuclear receptor coactivator 3 (NCoA-3) (EC 2.3.1.48) (ACTR) (Amplified in breast cancer 1 protein) (AIB-1) (CBP-interacting protein) (pCIP) (Class E basic helix-loop-helix protein 42) (bHLHe42) (Receptor-associated coactivator 3) (RAC-3) (Steroid receptor coactivator protein 3) (SRC-3) (Thyroid hormone receptor activator molecule 1) (TRAM-1)	FSLADGTIVTAQTK	0.984425	1450.77	3	0.86093	55.04	yes
Q96BU1	S100P-binding protein (S100P-binding protein Riken)	VPSEQSSGTSLLPK	0.984424	1428.75	3	0.34068	45.28	yes
O75369	Filamin-B (FLN-B) (ABP-278) (ABP-280 homolog) (Actin-binding-like protein) (Beta-filamin) (Filamin homolog 1) (Fh1) (Filamin-3) (Thyroid autoantigen) (Truncated actin-binding protein) (Truncated ABP)	ESIKLVSIDSK	0.9844	1217.69	5	4.5807	45.433	yes
Q15014	Mortality factor 4-like protein 2 (MORF-related gene X protein) (Protein MSL3-2) (Transcription factor-like protein MRGX)	SNMQRSKMR	0.984266	1136.55	2	2.4232	52.247	yes
Q7Z7B0	Filamin-A-interacting protein 1 (FILIP)	KGSELTCPEDNK	0.984262	1319.6	2	0.21739	42.976	yes
P48426	Phosphatidylinositol 5-phosphate 4-kinase type-2 alpha (EC 2.7.1.149) (1-phosphatidylinositol 5-phosphate 4-kinase 2-alpha) (Diphosphoinositide kinase 2-alpha) (PIP5KIII) (Phosphatidylinositol 5-phosphate 4-kinase type II alpha) (PI(5)P 4-kinase type II alpha) (PIP4KII-alpha) (PtdIns(4)P-5-kinase B isoform) (PtdIns(4)P-5-kinase C isoform) (PtdIns(5)P-4-kinase isoform 2-alpha)	ATPGNLGSSVLASKTK	0.98424	1529.84	3	3.8105	42.947	yes
Q6IQ32	Activity-dependent neuroprotector homeobox protein 2 (ADNP homeobox protein 2) (Zinc finger protein 508)	YSTKVLTSFK	0.984169	1172.64	2	0.7014	55.064	yes
Q9Y608	Leucine-rich repeat flightless-interacting protein 2 (LRR FLII-interacting protein 2)	MQQKIDTMTK	0.984051	1222.61	2	4.1657	49.189	yes
O95696	Bromodomain-containing protein 1 (BR140-like protein) (Bromodomain and PHD finger-containing protein 2)	TVRSTSKVR	0.983991	1032.6	3	3.9914	57.175	yes
Q9BVI0	PHD finger protein 20 (Glioma-expressed antigen 2) (Hepatocellular carcinoma-associated antigen 58) (Novel zinc finger protein) (Transcription factor TZP)	NYSENTDKDLSR	0.983954	1440.65	3	1.5212	65.179	yes
O75376	Nuclear receptor corepressor 1 (N-CoR) (N-CoR1)	SAAVSEQQQLEQK	0.983919	1444.72	3	0.011616	174.87	yes
Q15078	Cyclin-dependent kinase 5 activator 1 (CDK5 activator 1) (Cyclin-dependent kinase 5 regulatory subunit 1) (TPKII regulatory subunit) [Cleaved into: Cyclin-dependent kinase 5 activator 1, p35 (p35); Cyclin-dependent kinase 5 activator 1, p25 (p25) (Tau protein kinase II 23 kDa subunit) (p23)]	EAFWDRCLSVINLMSSK	0.983877	1997.97	3	1.1612	42.314	yes
Q8WV16	DDB1- and CUL4-associated factor 4 (WD repeat-containing protein 21A)	ADIPSVAFSSRLGGSR	0.983555	1618.84	3	1.1922	61.409	yes
Q08493	cAMP-specific 3',5'-cyclic phosphodiesterase 4C (EC 3.1.4.53) (DPDE1) (PDE21)	FYSDPDKSAGCR	0.983543	1344.58	3	5.9299	53.567	yes
Q68EM7	Rho GTPase-activating protein 17 (Rho-type GTPase-activating protein 17) (RhoGAP interacting with CIP4 homologs protein 1) (RICH-1)	SICHHSHKR	0.983542	1103.54	2	3.5853	40.882	yes
Q99590	Protein SCAF11 (CTD-associated SR protein 11) (Renal carcinoma antigen NY-REN-40) (SC35-interacting protein 1) (SR-related and CTD-associated factor 11) (SRSF2-interacting protein) (Serine/arginine-rich splicing factor 2-interacting protein) (Splicing factor, arginine/serine-rich 2-interacting protein) (Splicing regulatory protein 129) (SRrp129)	ETGKESR	0.983386	805.393	2	4.8231	58.604	yes
O43316	Paired box protein Pax-4	WEMQLPGASQGLTVPR	0.982999	1768.89	3	5.0698	40.477	yes
Q15056	Eukaryotic translation initiation factor 4H (eIF-4H) (Williams-Beuren syndrome chromosomal region 1 protein)	GMGSSRESRGGWDSR	0.982989	1623.72	4	1.9041	43.405	yes
Q96ER9	Coiled-coil domain-containing protein 51	TLCSPGPSQPGEK	0.982975	1299.61	4	0.70702	40.493	yes
Q9P2M4	TBC1 domain family member 14	LYSPTSKALTR	0.982948	1235.69	3	4.0038	55.291	yes
Q96ST2	Protein IWS1 homolog (IWS1-like protein)	WNVEMESSR	0.982906	1136.49	2	0.70023	82.417	yes
P18440	Arylamine N-acetyltransferase 1 (EC 2.3.1.5) (Arylamide acetylase 1) (Monomorphic arylamine N-acetyltransferase) (MNAT) (N-acetyltransferase type 1) (NAT-1)	TLSEEEIEK	0.982874	1076.52	3	4.7602	76.1	yes
P56589	Peroxisomal biogenesis factor 3 (Peroxin-3) (Peroxisomal assembly protein PEX3)	TCNMTVLSMLPTLR	0.982861	1578.79	2	3.1374	50.467	yes
P09543	2',3'-cyclic-nucleotide 3'-phosphodiesterase (CNP) (CNPase) (EC 3.1.4.37)	LSPTDNLPRGSR	0.982843	1311.69	3	2.0409	50.149	yes
P51610	Host cell factor 1 (HCF) (HCF-1) (C1 factor) (CFF) (VCAF) (VP16 accessory protein) [Cleaved into: HCF N-terminal chain 1; HCF N-terminal chain 2; HCF N-terminal chain 3; HCF N-terminal chain 4; HCF N-terminal chain 5; HCF N-terminal chain 6; HCF C-terminal chain 1; HCF C-terminal chain 2; HCF C-terminal chain 3; HCF C-terminal chain 4; HCF C-terminal chain 5; HCF C-terminal chain 6]	VTGPQATTGTPLVTMRPASQAGK	0.982837	2268.19	4	0.63773	48.854	yes
Q495D7	Putative uncharacterized protein encoded by LINC01559	SGQTALIEK	0.982748	945.513	3	1.4585	49.715	yes
Q5DID0	Uromodulin-like 1 (Olfactorin)	MQIVSLQAGSVVVR	0.982641	1485.83	3	2.0083	46.156	yes
Q9BXT5	Testis-expressed protein 15 (Cancer/testis antigen 42) (CT42)	NVNFSAAETKSDK	0.982492	1409.68	3	1.166	54.09	yes
Q8IYW2	Cilia- and flagella-associated protein 46 (Tetratricopeptide repeat protein 40)	AESQQDAASLKK	0.982468	1274.65	3	1.7988	49.081	yes
P78545	ETS-related transcription factor Elf-3 (E74-like factor 3) (Epithelial-restricted with serine box) (Epithelium-restricted Ets protein ESX) (Epithelium-specific Ets transcription factor 1) (ESE-1)	KKNSNMTYEK	0.982369	1241.61	3	3.112	57.347	yes
Q9UHV7	Mediator of RNA polymerase II transcription subunit 13 (Activator-recruited cofactor 250 kDa component) (ARC250) (Mediator complex subunit 13) (Thyroid hormone receptor-associated protein 1) (Thyroid hormone receptor-associated protein complex 240 kDa component) (Trap240) (Vitamin D3 receptor-interacting protein complex component DRIP250) (DRIP250)	MSDSATKK	0.98203	866.417	2	2.3354	98.048	yes
Q96QF7	Acidic repeat-containing protein (Germ cell nuclear antigen)	IGCYTKSLDTSR	0.981948	1342.66	3	0.42741	56.404	yes
Q9BVA0	Katanin p80 WD40 repeat-containing subunit B1 (Katanin p80 subunit B1) (p80 katanin)	FLPLITDMLAAPPSVGVDISR	0.981937	2211.2	3	5.7091	42.633	yes
Q9BR76	Coronin-1B (Coronin-2)	GMGSMPKRGLEVSK	0.981885	1475.76	2	4.6758	42.78	yes
A0MZ66	Shootin-1 (Shootin1)	EKATQPETTEEVTDLK	0.98186	1817.89	3	2.1283	58.693	yes
O43242	26S proteasome non-ATPase regulatory subunit 3 (26S proteasome regulatory subunit RPN3) (26S proteasome regulatory subunit S3) (Proteasome subunit p58)	MLPSTSRR	0.981674	946.502	3	2.3515	52.247	yes
Q8IZP0	Abl interactor 1 (Abelson interactor 1) (Abi-1) (Abl-binding protein 4) (AblBP4) (Eps8 SH3 domain-binding protein) (Eps8-binding protein) (Nap1-binding protein) (Nap1BP) (Spectrin SH3 domain-binding protein 1) (e3B1)	ALIESYQNLTR	0.98162	1306.69	2	4.0752	51.276	yes
O75128	Protein cordon-bleu	NGSENSHLR	0.981528	1012.47	2	5.7189	51.949	yes
Q9HAU5	Regulator of nonsense transcripts 2 (Nonsense mRNA reducing factor 2) (Up-frameshift suppressor 2 homolog) (hUpf2)	DSLSHDFNGLNLSK	0.981523	1545.74	3	5.7837	52.576	yes
Q9C0G0	Zinc finger protein 407	SEGSSIGESTRIR	0.981508	1377.68	3	0.023732	63.212	yes
A5YKK6	CCR4-NOT transcription complex subunit 1 (CCR4-associated factor 1) (Negative regulator of transcription subunit 1 homolog)	TVTVTRPTGVSFKK	0.981479	1519.87	2	1.5244	51.726	yes
Q8IVS2	Malonyl-CoA-acyl carrier protein transacylase, mitochondrial (MCT) (EC 2.3.1.39) (Mitochondrial malonyl CoA:ACP acyltransferase) (Mitochondrial malonyltransferase) ([Acyl-carrier-protein] malonyltransferase)	RMPGQCSVLLFPGQGSQVVGMGR	0.981272	2403.2	3	2.002	40.197	yes
Q9C0J8	pre-mRNA 3' end processing protein WDR33 (WD repeat-containing protein 33) (WD repeat-containing protein WDC146)	SSSLQGMDMASLPPR	0.98124	1575.74	3	3.5219	61.423	yes
Q5TCQ9	Membrane-associated guanylate kinase, WW and PDZ domain-containing protein 3 (Membrane-associated guanylate kinase inverted 3) (MAGI-3)	TLITPGPWK	0.981221	1011.58	2	4.9069	51.445	yes
Q86VP3	Phosphofurin acidic cluster sorting protein 2 (PACS-2) (PACS1-like protein)	TESLVIPSTRSEGKQAGR	0.981212	1915.01	4	2.9222	45.873	yes
Q5H9F3	BCL-6 corepressor-like protein 1 (BCoR-L1) (BCoR-like protein 1)	TKHMATVSEEAK	0.981206	1330.66	3	5.5678	50.95	yes
P0C7W0	Proline-rich protein 29	ASGAGGSWGR	0.981116	904.415	2	0.063291	56.551	yes
Q12955	Ankyrin-3 (ANK-3) (Ankyrin-G)	MKQVSQSEKTK	0.980964	1292.68	3	5.9839	50.108	yes
Q9BRR8	G patch domain-containing protein 1 (Evolutionarily conserved G-patch domain-containing protein)	ATPDPGTHSKHQLNASK	0.98092	1787.89	3	0.26694	52.19	yes
Q13427	Peptidyl-prolyl cis-trans isomerase G (PPIase G) (Peptidyl-prolyl isomerase G) (EC 5.2.1.8) (CASP10) (Clk-associating RS-cyclophilin) (CARS-Cyp) (CARS-cyclophilin) (SR-cyclophilin) (SR-cyp) (SRcyp) (Cyclophilin G) (Rotamase G)	EKSKQLESK	0.980825	1075.59	3	0.25961	64.73	yes
Q9NZC9	SWI/SNF-related matrix-associated actin-dependent regulator of chromatin subfamily A-like protein 1 (EC 3.6.4.-) (HepA-related protein) (hHARP) (Sucrose nonfermenting protein 2-like 1)	TLPSKNYDPDTK	0.980624	1377.68	3	0.86989	42.083	yes
Q460N5	Poly [ADP-ribose] polymerase 14 (PARP-14) (EC 2.4.2.30) (ADP-ribosyltransferase diphtheria toxin-like 8) (ARTD8) (B aggressive lymphoma protein 2)	CHCELTWSQLSGK	0.979957	1490.66	3	2.2382	53.6	yes
Q8NEM8	Cytosolic carboxypeptidase 3 (EC 3.4.17.-) (ATP/GTP-binding protein-like 3)	HTALHLTKNK	0.979846	1161.66	2	3.6828	44.614	yes
Q7Z7G8	Vacuolar protein sorting-associated protein 13B (Cohen syndrome protein 1)	CASGTMGSIKICAKAPVDSGK	0.979572	2022.99	4	0.75722	47.082	yes
Q8IYS4	Uncharacterized protein C16orf71	DACGPTSSDKGGVK	0.979486	1320.6	3	5.4357	48.899	yes
P47985	Cytochrome b-c1 complex subunit Rieske, mitochondrial (EC 1.10.2.2) (Complex III subunit 5) (Cytochrome b-c1 complex subunit 5) (Rieske iron-sulfur protein) (RISP) (Rieske protein UQCRFS1) (Ubiquinol-cytochrome c reductase iron-sulfur subunit) [Cleaved into: Cytochrome b-c1 complex subunit 9 (Su9) (Subunit 9) (8 kDa subunit 9) (Complex III subunit IX) (Cytochrome b-c1 complex subunit 11) (Ubiquin…	MLSVASR	0.979296	762.406	2	4.063	50.127	yes
P17039	Zinc finger protein 30 (Zinc finger protein KOX28)	IHSSEKPNRCK	0.979282	1297.66	4	1.5634	51.445	yes
A5YKK6	CCR4-NOT transcription complex subunit 1 (CCR4-associated factor 1) (Negative regulator of transcription subunit 1 homolog) (NOT1H) (hNOT1)	KDFALDSEESR	0.97909	1295.6	3	2.3691	50.791	yes
O95147	Dual specificity protein phosphatase 14 (EC 3.1.3.16) (EC 3.1.3.48) (MKP-1-like protein tyrosine phosphatase) (MKP-L) (Mitogen-activated protein kinase phosphatase 6) (MAP kinase phosphatase 6) (MKP-6)	MSSRGHSTLPR	0.97907	1227.61	3	3.542	44.564	yes
P24863	Cyclin-C (SRB11 homolog) (hSRB11)	AGNFWQSSHYLQWILDK	0.979067	2092.02	4	5.4511	46.89	yes
Q99996	A-kinase anchor protein 9 (AKAP-9) (A-kinase anchor protein 350 kDa) (AKAP 350) (hgAKAP 350) (A-kinase anchor protein 450 kDa) (AKAP 450) (AKAP 120-like protein) (Centrosome- and Golgi-localized PKN-associated protein) (CG-NAP) (Protein hyperion) (Protein kinase A-anchoring protein 9) (PRKA9) (Protein yotiao)	CSELLLSKEQLQR	0.979017	1545.82	3	2.6297	53.034	yes
Q2NKX8	DNA excision repair protein ERCC-6-like (EC 3.6.4.12) (ATP-dependent helicase ERCC6-like) (PLK1-interacting checkpoint helicase) (Tumor antigen BJ-HCC-15)	AAEATNDYETLVKRGK	0.979015	1764.9	4	1.6887	50.392	yes
Q6ZN04	RNA-binding protein MEX3B (RING finger and KH domain-containing protein 3) (RING finger protein 195)	RIQQQTHTYIVTPSR	0.979006	1826.98	3	0.38497	42.469	yes
Q5VST9	Obscurin (EC 2.7.11.1) (Obscurin-RhoGEF) (Obscurin-myosin light chain kinase) (Obscurin-MLCK)	NKEATEGATATLRCELSK	0.978946	1920.96	4	0.94716	41.115	yes
Q8NE18	Putative methyltransferase NSUN7 (EC 2.1.1.-) (NOL1/NOP2/Sun domain family member 7)	FFRMEPSEITNGCFLSILTR	0.978931	2360.17	3	1.8292	48.077	yes
Q9H2Y7	Zinc finger protein 106 (Zfp-106) (Zinc finger protein 474)	VTTSTWEDSRTGR	0.978775	1494.71	3	4.3058	47.712	yes
Q96PF2	Testis-specific serine/threonine-protein kinase 2 (TSK-2) (TSK2) (TSSK-2) (Testis-specific kinase 2) (EC 2.7.11.1) (DiGeorge syndrome protein G) (DGS-G) (Serine/threonine-protein kinase 22B)	VKSAYSER	0.978674	938.482	2	1.7515	73.665	yes
Q96ER9	Coiled-coil domain-containing protein 51	TAYLRAEDSER	0.978454	1309.63	3	5.224	45.28	yes
Q9NQS7	Inner centromere protein	SRSSQLSSRR	0.978412	1162.62	3	3.747	50.102	yes
Q9ULU4	Protein kinase C-binding protein 1 (Cutaneous T-cell lymphoma-associated antigen se14-3) (CTCL-associated antigen se14-3) (Rack7) (Zinc finger MYND domain-containing protein 8)	STSPASEKADPGAVK	0.978185	1443.72	4	3.1238	43.696	yes
Q9NWS8	Required for meiotic nuclear division protein 1 homolog	RVTHKPNLLGSK	0.978172	1348.79	3	1.8271	49.216	yes
Q9P270	SLAIN motif-containing protein 2	FRSPAAPSPLALRQPVK	0.978171	1834.06	4	1.1416	45.54	yes
Q6ZRS2	Helicase SRCAP (EC 3.6.4.-) (Domino homolog 2) (Snf2-related CBP activator)	DSTSVLESCGLGR	0.97817	1322.61	3	2.2101	53.6	yes
Q96S90	LysM and putative peptidoglycan-binding domain-containing protein 1	LYTNDSIFLKK	0.978029	1340.73	3	4.6405	51.445	yes
Q7Z4V0	Zinc finger protein 438	DHMNTHTNRRPYSCRICR	0.978028	2259.03	4	5.1557	42.818	yes
Q9NR09	Baculoviral IAP repeat-containing protein 6 (EC 2.3.2.27) (BIR repeat-containing ubiquitin-conjugating enzyme) (BRUCE) (RING-type E3 ubiquitin transferase BIRC6) (Ubiquitin-conjugating BIR domain enzyme apollon) (APOLLON)	LSMTDDSKK	0.9779	1023.49	3	5.7487	46.159	yes
Q8NDA8	Maestro heat-like repeat-containing protein family member 1 (HEAT repeat-containing protein 7A)	SMLLRSGSEDVVQR	0.977869	1575.8	3	3.0942	49.333	yes
Q7Z2Z2	Elongation factor-like GTPase 1 (Elongation factor Tu GTP-binding domain-containing protein 1) (Elongation factor-like 1) (Protein FAM42A)	ETITKPPK	0.97786	912.528	2	0.95231	54.611	yes
Q8N3A8	Poly [ADP-ribose] polymerase 8 (PARP-8) (EC 2.4.2.30) (ADP-ribosyltransferase diphtheria toxin-like 16) (ARTD16)	HGEIWVVPNTDHVCTR	0.977821	1861.89	4	2.738	42.388	yes
P49454	Centromere protein F (CENP-F) (AH antigen) (Kinetochore protein CENPF) (Mitosin)	SWALEEWKEGLPTR	0.977325	1700.85	3	0.73855	44.511	yes
Q96KB5	Lymphokine-activated killer T-cell-originated protein kinase (EC 2.7.12.2) (Cancer/testis antigen 84) (CT84) (MAPKK-like protein kinase) (Nori-3) (PDZ-binding kinase) (Spermatogenesis-related protein kinase) (SPK) (T-LAK cell-originated protein kinase)	LLHGDIKSSNVVIKGDFETIK	0.97725	2312.27	3	2.3461	40.968	yes
Q7Z739	YTH domain-containing family protein 3	IGGDLTAAVTK	0.977181	1044.58	3	0.0026914	78.401	yes
Q9ULE4	Protein FAM184B	KEASAETEYMK	0.977173	1285.59	2	2.2149	47.971	yes
Q96M29	Tektin-5	HSQNMRANSIQLR	0.977119	1553.78	3	2.1145	46.88	yes
Q9UKY1	Zinc fingers and homeoboxes protein 1	SQVPAAQPTAETKPATAAVPTSQSVK	0.977053	2564.34	4	0.27132	89.221	yes
Q96JP0	Protein fem-1 homolog C (FEM1c) (FEM1-gamma)	YPVCKFPSLQVTAILIECGADVNVR	0.976963	2734.42	3	0.36942	51.469	yes
Q70EL4	Ubiquitin carboxyl-terminal hydrolase 43 (EC 3.4.19.12) (Deubiquitinating enzyme 43) (Ubiquitin thioesterase 43) (Ubiquitin-specific-processing protease 43)	YHTLSLGRKK	0.976877	1201.69	3	4.3043	46.001	yes
Q8WYP5	Protein ELYS (Embryonic large molecule derived from yolk sac) (Protein MEL-28) (Putative AT-hook-containing transcription factor 1)	LISPLASPADGVK	0.976849	1266.72	2	3.918	42.785	yes
Q13185	Chromobox protein homolog 3 (HECH) (Heterochromatin protein 1 homolog gamma) (HP1 gamma) (Modifier 2 protein)	KSLSDSESDDSKSK	0.976848	1511.7	3	1.8214	44.426	yes
Q9UKV3	Apoptotic chromatin condensation inducer in the nucleus (Acinus)	MPEAVGTDPSTSR	0.976813	1346.61	3	1.7345	42.475	yes
Q9P1Y6	PHD and RING finger domain-containing protein 1	SGTRSESRDR	0.976795	1149.55	3	2.5735	48.602	yes
P33316	Deoxyuridine 5'-triphosphate nucleotidohydrolase, mitochondrial (dUTPase) (EC 3.6.1.23) (dUTP pyrophosphatase)	LSEHATAPTR	0.976722	1081.55	2	5.6389	50.452	yes
Q6XE24	RNA-binding motif, single-stranded-interacting protein 3	GLPPGTTDQDLIK	0.976674	1353.71	3	3.9823	50.484	yes
Q96PE3	Type I inositol 3,4-bisphosphate 4-phosphatase (Inositol polyphosphate 4-phosphatase type I)	GPSFKASSLK	0.976646	1020.56	2	5.878	58.699	yes
P54750	Calcium/calmodulin-dependent 3',5'-cyclic nucleotide phosphodiesterase 1A (Cam-PDE 1A) (EC 3.1.4.17) (61 kDa Cam-PDE) (hCam-1)	DWLASTFTR	0.976632	1095.53	3	5.6089	44.564	yes
Q9UHR5	SAP30-binding protein (Transcriptional regulator protein HCNGP)	KGTTTNATSTTTTTASTAVADAQK	0.976371	2327.15	4;5	0.0082588	126.15	yes
P10243	Myb-related protein A (A-Myb) (Myb-like protein 1)	TYTLTKK	0.976245	853.491	3	2.1897	52.636	yes
Q9BWF2	E3 ubiquitin-protein ligase TRAIP (EC 2.3.2.27) (RING finger protein 206) (RING-type E3 ubiquitin transferase TRAIP) (TRAF-interacting protein)	QPKRPRSESSCSK	0.976211	1488.75	3	5.7631	43.68	yes
Q14966	Zinc finger protein 638 (Cutaneous T-cell lymphoma-associated antigen se33-1) (CTCL-associated antigen se33-1) (Nuclear protein 220) (Zinc finger matrin-like protein)	NLEDDTLSECKQVSDK	0.976138	1822.83	3	1.2741	72.583	yes
Q9H2W2	Homeobox protein MIXL1 (Homeodomain protein MIX) (hMix) (MIX1 homeobox-like protein 1) (Mix.1 homeobox-like protein)	GAAAPSASQRR	0.97608	1070.56	3	5.6303	50.108	yes
Q0IIN9	Putative uncharacterized protein ZNF252P-AS1 (ZNF252P antisense RNA 1) (ZNF252P antisense gene protein 1)	TSRGALSPSLGR	0.975978	1200.66	4	0.93127	43.68	yes
Q01484	Ankyrin-2 (ANK-2) (Ankyrin-B) (Brain ankyrin) (Non-erythroid ankyrin)	SHTLSHASYLR	0.975694	1270.64	2	0.064277	57.785	yes
P35663	Cylicin-1 (Cylicin I) (Multiple-band polypeptide I)	NAESTEMESDLELKK	0.975623	1722.8	3	2.3648	61.524	yes
Q5T5U3	Rho GTPase-activating protein 21 (Rho GTPase-activating protein 10) (Rho-type GTPase-activating protein 21)	DDTSPPKDK	0.975472	1001.47	3	1.7686	66.19	yes
P20337	Ras-related protein Rab-3B	MASVTDGKTGVK	0.975424	1192.61	2	3.2813	45.653	yes
Q6ZTY9	Uncharacterized protein C7orf65	MRMAPTESTEGR	0.975386	1364.62	3	4.2007	50.354	yes
Q9UHV9	Prefoldin subunit 2	ENSEGAGAKASSAGVLVS	0.975354	1632.8	4	0.82645	40.187	yes
Q5BKX8	Caveolae-associated protein 4 (Muscle-related coiled-coil protein) (Muscle-restricted coiled-coil protein)	TRIVTPER	0.975306	970.556	3	0.71901	66.073	yes
P47914	60S ribosomal protein L29 (Cell surface heparin-binding protein HIP) (Large ribosomal subunit protein eL29)	SKNHTTHNQSRK	0.975283	1436.72	2	2.0228	47.037	yes
O60259	Kallikrein-8 (hK8) (EC 3.4.21.118) (Neuropsin) (NP) (Ovasin) (Serine protease 19) (Serine protease TADG-14) (Tumor-associated differentially expressed gene 14 protein)	DQASLGSKVKPISLADHCTQPGQK	0.975244	2507.28	4	1.8754	42.123	yes
Q9C0D2	Centrosomal protein of 295 kDa	VLDINPQVEETDSR	0.974921	1613.79	2	0.53908	46.985	yes
Q4LE39	AT-rich interactive domain-containing protein 4B (ARID domain-containing protein 4B) (180 kDa Sin3-associated polypeptide) (Sin3-associated polypeptide p180) (Breast cancer-associated antigen BRCAA1) (Histone deacetylase complex subunit SAP180) (Retinoblastoma-binding protein 1-like 1)	DDDTTRVDESLNIKVEAEEEK	0.9748	2434.13	4	3.659	41.912	yes
P15170	Eukaryotic peptide chain release factor GTP-binding subunit ERF3A (Eukaryotic peptide chain release factor subunit 3a) (eRF3a) (G1 to S phase transition protein 1 homolog)	SGEKSKTRPR	0.974699	1144.63	2	4.009	46.819	yes
Q86SQ0	Pleckstrin homology-like domain family B member 2 (Protein LL5-beta)	SETTELMKEK	0.974693	1194.58	3	2.734	63.184	yes
Q01081	Splicing factor U2AF 35 kDa subunit (U2 auxiliary factor 35 kDa subunit) (U2 small nuclear RNA auxiliary factor 1) (U2 snRNP auxiliary factor small subunit)	NPQNSSQSADGLR	0.974624	1372.63	3	3.2081	49.243	yes
Q7Z401	C-myc promoter-binding protein (DENN domain-containing protein 4A)	LTGTSNNSAGK	0.974599	1048.51	2	1.3311	43.77	yes
Q8WVY7	Ubiquitin-like domain-containing CTD phosphatase 1 (EC 3.1.3.16) (Nuclear proteasome inhibitor UBLCP1)	FSEFYSKK	0.974583	1034.51	3	0.2373	43.808	yes
Q9UJW7	Zinc finger protein 229	RALHSQASAISQDR	0.974519	1538.79	3	3.9892	44.598	yes
O14604	Thymosin beta-4, Y-chromosomal	MSDKPGMAEIEKFDKSK	0.974461	1939.94	3	1.6776	41.088	yes
Q5T6S3	PHD finger protein 19 (Polycomb-like protein 3) (hPCL3)	SSITNYFGAAGRLACGEK	0.974312	1843.89	4	2.6211	40.493	yes
Q7L8S5	OTU domain-containing protein 6A (EC 3.4.19.12) (DUBA-2)	SLKNSVPKTDK	0.974254	1215.68	3	2.5856	49.466	yes
Q96N53	Putative uncharacterized protein encoded by LINC00167	SPAFLLSANQKTRLFALGSSPR	0.974225	2360.3	4	4.3603	46.494	yes
Q9UER7	Death domain-associated protein 6 (Daxx) (hDaxx) (ETS1-associated protein 1) (EAP1) (Fas death domain-associated protein)	LYVYINELCTVLKAHSAKK	0.974201	2192.2	3	3.8052	50.831	yes
Q9NWH9	SAFB-like transcription modulator (Modulator of estrogen-induced transcription)	ESKDSKTSSK	0.974108	1095.54	3	3.9546	44.318	yes
Q92670	Putative zinc finger protein 75C (Zinc finger protein 75C pseudogene)	ELKADACLNSHMGAMWETNRSVK	0.973979	2590.21	4	3.0272	51.566	yes
Q16186	Proteasomal ubiquitin receptor ADRM1 (110 kDa cell membrane glycoprotein) (Gp110) (Adhesion-regulating molecule 1) (ARM-1) (Proteasome regulatory particle non-ATPase 13) (hRpn13) (Rpn13 homolog)	SQSAAVTPSSTTSSTR	0.973867	1566.75	2;3;4	0.024256	187.04	yes
Q86U70	LIM domain-binding protein 1 (LDB-1) (Carboxyl-terminal LIM domain-binding protein 2) (CLIM-2) (LIM domain-binding factor CLIM2) (hLdb1) (Nuclear LIM interactor)	SENPTSQASQ	0.973821	1047.45	3	0.12362	103.14	yes
A8MV65	Transcription cofactor vestigial-like protein 3 (Vgl-3)	LAVFSKMQDSLEVTLPSK	0.973692	1992.06	3	4.8843	60.549	yes
Q8NFG4	Folliculin (BHD skin lesion fibrofolliculoma protein) (Birt-Hogg-Dube syndrome protein)	ELTQGPAESSSLSGCGSWQPR	0.973661	2175.99	3	3.4937	41.912	yes
Q8N9W8	Protein FAM71D	DTETLFKSLLTSPPAEK	0.97366	1875.98	4	2.3941	70.987	yes
Q96S07	Proline-rich protein 25	GDQTTGGQAPSR	0.973329	1173.54	3	3.8733	41.088	yes
Q9NPG3	Ubinuclein-1 (HIRA-binding protein) (Protein VT4) (Ubiquitously expressed nuclear protein)	ASPTQCHRSLLQLVK	0.973226	1679.91	3	3.7634	48.711	yes
O43166	Signal-induced proliferation-associated 1-like protein 1 (SIPA1-like protein 1) (High-risk human papilloma viruses E6 oncoproteins targeted protein 1) (E6-targeted protein 1)	HSASPVVFTSARSSPK	0.97277	1656.86	4	4.2046	48.288	yes
Q8IUG5	Unconventional myosin-XVIIIb	VTQENTSVR	0.97253	1032.52	3	1.4493	46.069	yes
Q6K0P9	Pyrin and HIN domain-containing protein 1 (Interferon-inducible protein X)	MFHATVATQTQFFHVK	0.972324	1891.94	3	2.4429	47.75	yes
Q9Y520	Protein PRRC2C (BAT2 domain-containing protein 1) (HBV X-transactivated gene 2 protein) (HBV XAg-transactivated protein 2) (HLA-B-associated transcript 2-like 2) (Proline-rich and coiled-coil-containing protein 2C)	ESVTDYTTPSSSLPNTVATNNTK	0.972272	2426.14	2;3	0.0011407	173.43	yes
Q4G0P3	Hydrocephalus-inducing protein homolog	SLVMAVNITCEFVAPLIQLSTK	0.972026	2376.28	3	4.6394	45.237	yes
Q9NQ94	APOBEC1 complementation factor (APOBEC1-stimulating protein)	SGDGLSGTQKEAALR	0.971766	1488.75	2	5.8014	45.347	yes
Q7Z5J4	Retinoic acid-induced protein 1	SLTALSEPR	0.971639	972.524	2	0.88441	69.812	yes
Q8WXH0	Nesprin-2 (KASH domain-containing protein 2) (KASH2) (Nuclear envelope spectrin repeat protein 2) (Nucleus and actin connecting element protein) (Protein NUANCE) (Synaptic nuclear envelope protein 2) (Syne-2)	SSSCLQAKLTDLQVIKNETDAR	0.97156	2419.24	3	0.46626	50.404	yes
P09884	DNA polymerase alpha catalytic subunit (EC 2.7.7.7) (DNA polymerase alpha catalytic subunit p180)	DVSPPPLVVMAFSMK	0.971556	1616.83	3	2.0728	49.537	yes
Q9H347	Ubiquilin-3	TPKDKEDFSVTDTCTIQQLK	0.971447	2296.13	3	4.1593	43.794	yes
O43312	Metastasis suppressor protein 1 (Metastasis suppressor YGL-1) (Missing in metastasis protein)	SSGSHSHSPSSHYR	0.971403	1511.65	4	0.3724	44.426	yes
Q96G21	U3 small nucleolar ribonucleoprotein protein IMP4 (U3 snoRNP protein IMP4) (Brix domain-containing protein 4)	VMITTSRDPSSR	0.97128	1348.68	3	1.1866	60.255	yes
P49790	Nuclear pore complex protein Nup153 (153 kDa nucleoporin) (Nucleoporin Nup153)	SSSAGFSFGTGVINSTPAPANTIVTSENK	0.971279	2840.38	4	0.0086505	141	yes
Q8TBY0	Probable RNA-binding protein 46 (Cancer/testis antigen 68) (CT68) (RNA-binding motif protein 46)	CIDGASIEVTLAKPVNKENTWR	0.971083	2443.25	4	3.1105	49.924	yes
O75182	Paired amphipathic helix protein Sin3b (Histone deacetylase complex subunit Sin3b) (Transcriptional corepressor Sin3b)	ALPKTYQQPKCSGR	0.971005	1575.82	3	5.2638	42.317	yes
P17097	Zinc finger protein 7 (Zinc finger protein HF.16) (Zinc finger protein KOX4)	AFSQSSSLIYHQR	0.970983	1522.75	3	0.32718	48.391	yes
P31321	cAMP-dependent protein kinase type I-beta regulatory subunit	TMTALAKAISK	0.970928	1133.65	3	3.1069	49.216	yes
Q8WXI3	Ankyrin repeat and SOCS box protein 10 (ASB-10)	CLQLCSLLLSAGADADAADQDK	0.970922	2220.04	3	5.7318	42.679	yes
H7BZ55	Putative ciliary rootlet coiled-coil protein 2	EKETLSLTLAEEK	0.970794	1489.79	3	4.2761	49.595	yes
Q9H089	Large subunit GTPase 1 homolog(hLsg1)	KVSVSATPGHTK	0.97077	1210.67	4	1.1376	45.661	yes
Q9UL01	Dermatan-sulfate epimerase (DS epimerase) (EC 5.1.3.19) (Chondroitin-glucuronate 5-epimerase) (Squamous cell carcinoma antigen recognized by T-cells 2) (SART-2)	FSDKRQTEEAIDR	0.97065	1593.77	3	3.1831	41.743	yes
Q7Z460	CLIP-associating protein 1 (Cytoplasmic linker-associated protein 1) (Multiple asters homolog 1) (Protein Orbit homolog 1) (hOrbit1)	LCEIFTRMFADPHSK	0.970625	1793.86	4	1.7179	66.022	yes
Q9UPQ9	Trinucleotide repeat-containing gene 6B protein	RSPAWNETGR	0.970607	1172.57	2	2.4818	50.108	yes
Q8IY18	Structural maintenance of chromosomes protein 5 (SMC protein 5) (SMC-5) (hSMC5)	ATPSKKTSTPSPQPSK	0.970459	1640.87	3	3.1288	46.797	yes
Q9NYV4	Cyclin-dependent kinase 12 (EC 2.7.11.22) (EC 2.7.11.23) (Cdc2-related kinase, arginine/serine-rich) (CrkRS) (Cell division cycle 2-related protein kinase 7) (CDC2-related protein kinase 7) (Cell division protein kinase 12) (hCDK12)	TSAVSSQANSQPPVQVSVK	0.970388	1912.99	3;4	0.015343	125.08	yes
A8MTB9	Carcinoembryonic antigen-related cell adhesion molecule 18	MTISPDGK	0.970139	847.411	2	0.56089	42.599	yes
Q96T52	Mitochondrial inner membrane protease subunit 2 (EC 3.4.21.-) (IMP2-like protein)	GDIVSLVSPKNPEQK	0.970137	1609.87	3	2.0123	57.106	yes
Q5VV52	Zinc finger protein 691	SFSQSATLAVHHR	0.97012	1439.73	3	1.7756	65.179	yes
Q9H6U6	Breast carcinoma-amplified sequence 3 (GAOB1)	LADAMAESPSR	0.970061	1146.53	2	4.1679	48.981	yes
Q8NHP1	Aflatoxin B1 aldehyde reductase member 4 (EC 1.-.-.-) (AFB1 aldehyde reductase 3) (AFB1-AR 3) (Aldoketoreductase 7-like)	ALQAAYGASAPSMTSAALR	0.969848	1835.92	4	1.0738	54.281	yes
O14607	Histone demethylase UTY (EC 1.14.11.-) (Ubiquitously-transcribed TPR protein on the Y chromosome) (Ubiquitously-transcribed Y chromosome tetratricopeptide repeat protein)	RCSNTSTLAAR	0.969303	1178.58	2	0.66127	46.406	yes
Q8N1Q8	Acyl-coenzyme A thioesterase THEM5 (Acyl-CoA thioesterase THEM5) (EC 3.1.2.2) (Acyl-coenzyme A thioesterase 15) (Thioesterase superfamily member 5)	TKSSGWIK	0.969219	905.497	2	0.054811	52.482	yes
Q504Q3	PAN2-PAN3 deadenylation complex catalytic subunit PAN2 (EC 3.1.13.4) (Inactive ubiquitin carboxyl-terminal hydrolase 52) (PAB1P-dependent poly(A)-specific ribonuclease) (Poly(A)-nuclease deadenylation complex subunit 2) (PAN deadenylation complex subunit 2)	TGGSLVAHIKVGETYHQR	0.96916	1952.02	4	4.222	46.892	yes
Q14739	Lamin-B receptor (Integral nuclear envelope inner membrane protein) (LMN2R)	LAHLKTIHTSTGK	0.969062	1405.8	4	5.5051	52.172	yes
Q9H165	B-cell lymphoma/leukemia 11A (BCL-11A) (B-cell CLL/lymphoma 11A) (COUP-TF-interacting protein 1) (Ecotropic viral integration site 9 protein homolog) (EVI-9) (Zinc finger protein 856)	GCSPGESASGGLSK	0.968956	1235.55	3	3.2029	51.135	yes
Q9Y6K9	NF-kappa-B essential modulator (NEMO) (FIP-3) (IkB kinase-associated protein 1) (IKKAP1) (Inhibitor of nuclear factor kappa-B kinase subunit gamma) (I-kappa-B kinase subunit gamma) (IKK-gamma) (IKKG) (IkB kinase subunit gamma) (NF-kappa-B essential modifier)	ASCQESAR	0.96889	850.36	2	3.1773	52.49	yes
Q9UBP9	PTB domain-containing engulfment adapter protein 1 (Cell death protein 6 homolog) (PTB domain adapter protein CED-6) (Protein GULP)	FLESGGKDVETRK	0.968863	1464.76	3	1.3335	52.112	yes
Q92766	Ras-responsive element-binding protein 1 (RREB-1) (Finger protein in nuclear bodies) (Raf-responsive zinc finger protein LZ321) (Zinc finger motif enhancer-binding protein 1) (Zep-1)	RFWSLQDLTR	0.96842	1320.69	3	5.3013	43.77	yes
O95932	Protein-glutamine gamma-glutamyltransferase 6 (EC 2.3.2.13) (Transglutaminase Y) (TGY) (TGase Y) (Transglutaminase-3-like) (TGase-3-like) (Transglutaminase-6) (TG6) (TGase-6)	GQSFSLTLELSR	0.968354	1336.7	3	0.35514	53.237	yes
Q6XZF7	Dynamin-binding protein (Scaffold protein Tuba)	QPTATPR	0.96833	769.408	2	4.4811	52.403	yes
Q96T58	Msx2-interacting protein (SMART/HDAC1-associated repressor protein) (SPEN homolog)	ASDVDTSSSTLR	0.968157	1237.58	3	0.055694	83.856	yes
Q8N0Z3	Spindle and centriole-associated protein 1 (Coiled-coil domain-containing protein 52) (Spindle and centriole-associated protein)	QEIQASESGATGRR	0.968102	1488.73	2	0.63313	45.28	yes
Q86TG7	Retrotransposon-derived protein PEG10 (Embryonal carcinoma differentiation-regulated protein) (Mammalian retrotransposon-derived protein 2) (Myelin expression factor 3-like protein 1) (MEF3-like protein 1) (Paternally expressed gene 10 protein) (Retrotransposon gag domain-containing protein 3) (Retrotransposon-derived gag-like polyprotein) (Ty3/Gypsy-like protein)	EKVMKQSEENNNLQSQVQK	0.967987	2260.11	4	3.9892	44.299	yes
Q5T7N8	Protein FAM27D1	LTPTNTVR	0.96795	900.503	3	5.5847	49.097	yes
Q70YC5	Protein ZNF365 (DISC1-binding zinc-finger protein) (Protein su48)	QRLTESEEELLR	0.967919	1501.77	3	4.0583	46.41	yes
Q86XT4	E3 ubiquitin-protein ligase TRIM50 (EC 2.3.2.27) (RING-type E3 ubiquitin transferase TRIM50) (Tripartite motif-containing protein 50)	LGVIKGTASR	0.967626	1000.6	2	5.9025	67.334	yes
Q5CZC0	Fibrous sheath-interacting protein 2	LVSAVATEISQDK	0.967621	1359.72	2	5.1258	48.568	yes
Q9UHK0	Nuclear fragile X mental retardation-interacting protein 1 (Nuclear FMRP-interacting protein 1)	NFSEAKSENR	0.967481	1180.55	2	0.47182	46.457	yes
Q7Z2G1	Histone H2B type W-T (H2B histone family member W testis-specific)	EANSTTSQKQSK	0.967445	1307.63	3	0.1757	59.198	yes
P05387	60S acidic ribosomal protein P2 (Large ribosomal subunit protein P2) (Renal carcinoma antigen NY-REN-44)	LASVPAGGAVAVSAAPGSAAPAAGSAPAAAEEK	0.967356	2773.42	4	0.1826	117.66	yes
Q3SX64	Outer dense fiber protein 3-like protein 2	VTEGQIPETGLR	0.967119	1298.68	3	1.5909	48.527	yes
Q8TDM6	Disks large homolog 5 (Discs large protein P-dlg) (Placenta and prostate DLG)	SCDEDLTSQK	0.967081	1124.47	3	1.7733	49.483	yes
Q86XA9	HEAT repeat-containing protein 5A	SKDDSPSYLPTK	0.966995	1336.65	3	2.5298	60.255	yes
Q9HCL2	Glycerol-3-phosphate acyltransferase 1, mitochondrial (GPAT-1) (EC 2.3.1.15)	TERNVAVYAESATYCLVK	0.966545	2016	4	1.9312	44.278	yes
Q05823	2-5A-dependent ribonuclease (2-5A-dependent RNase) (EC 3.1.26.-) (Ribonuclease 4) (Ribonuclease L) (RNase L)	TRKSESEILR	0.966538	1217.67	2	0.9396	46.406	yes
Q9GZY8	Mitochondrial fission factor	GTSSDTSLGRVSR	0.966522	1321.66	4	3.1062	48.044	yes
Q13490	Baculoviral IAP repeat-containing protein 2 (EC 2.3.2.27) (Cellular inhibitor of apoptosis 1) (C-IAP1) (IAP homolog B) (Inhibitor of apoptosis protein 2) (hIAP-2) (hIAP2) (RING finger protein 48) (RING-type E3 ubiquitin transferase BIRC2) (TNFR2-TRAF-signaling complex protein 2)	HKTASQR	0.966384	826.441	2	2.7084	47.849	yes
Q96HC4	PDZ and LIM domain protein 5 (Enigma homolog) (Enigma-like PDZ and LIM domains protein)	KANNSQEPSPQLASSVASTR	0.966367	2071.03	2;4	0.047518	107.29	yes
Q13573	SNW domain-containing protein 1 (Nuclear protein SkiP) (Nuclear receptor coactivator NCoA-62) (Ski-interacting protein)	TRVALEKSVSQK	0.966228	1344.77	2	1.1889	41.242	yes
Q13813	Spectrin alpha chain, non-erythrocytic 1 (Alpha-II spectrin) (Fodrin alpha chain) (Spectrin, non-erythroid alpha subunit)	DETDSKTASPWKSAR	0.966179	1677.8	3	1.19	51.009	yes
Q13416	Origin recognition complex subunit 2	NDPEITINVPQSSK	0.96612	1540.77	2	1.5679	50.874	yes
Q86X59	Putative uncharacterized protein C17orf82	DRGTPGLRTH	0.965641	1108.57	2	1.8717	49.448	yes
Q96MF6	Coenzyme Q-binding protein COQ10 homolog A, mitochondrial	SFMGFAAPFTNKR	0.965637	1472.72	2	1.9581	42.425	yes
Q9P2D6	Protein FAM135A	ASMKIPSR	0.965338	888.485	2	2.7165	41.876	yes
Q5UIP0	Telomere-associated protein RIF1 (Rap1-interacting factor 1 homolog)	EGTFSKSDSEK	0.965308	1213.55	3	3.3091	42.718	yes
Q17RS7	Flap endonuclease GEN homolog 1 (EC 3.1.-.-)	RNQSRYGSSGK	0.965176	1238.61	3	0.095465	44.44	yes
Q6IQ23	Pleckstrin homology domain-containing family A member 7 (PH domain-containing family A member 7)	GDSRSLPLDQTLPR	0.965058	1553.82	4	3.9065	44.312	yes
Q8TE54	Anion exchange transporter (Solute carrier family 26 member 7)	AMTVSIKNMK	0.965052	1121.59	3	1.8451	49.934	yes
Q96PQ5	Putative protein phosphatase inhibitor 2-like protein 1 (Protein phosphatase 1, regulatory subunit 2 pseudogene 1)	GSVHEQLSKKSQK	0.964989	1454.78	3	2.3988	47.062	yes
Q9UQ88	Cyclin-dependent kinase 11A (EC 2.7.11.22) (Cell division cycle 2-like protein kinase 2) (Cell division protein kinase 11A) (Galactosyltransferase-associated protein kinase p58/GTA) (PITSLRE serine/threonine-protein kinase CDC2L2)	HEYFRETPLPIDPSMFPTWPAK	0.964987	2658.29	4	5.6488	43.164	yes
Q9NU22	Midasin (Dynein-related AAA-ATPase MDN1) (MIDAS-containing protein)	QGSDAYDAQTYDVASK	0.964756	1717.74	3	2.5496	45.221	yes
P30622	CAP-Gly domain-containing linker protein 1 (Cytoplasmic linker protein 1) (Cytoplasmic linker protein 170 alpha-2) (CLIP-170) (Reed-Sternberg intermediate filament-associated protein) (Restin)	KASSEGKSEMK	0.964747	1180.58	3	0.09324	44.543	yes
P14859	POU domain, class 2, transcription factor 1 (NF-A1) (Octamer-binding protein 1) (Oct-1) (Octamer-binding transcription factor 1) (OTF-1)	RINPPSSGGTSSSPIK	0.964538	1583.83	3	5.5877	41.621	yes
O60547	GDP-mannose 4,6 dehydratase (EC 4.2.1.47) (GDP-D-mannose dehydratase) (GMD)	LLDAVKTCGLINSVK	0.964316	1572.89	2	0.42138	46.873	yes
O76031	ATP-dependent Clp protease ATP-binding subunit clpX-like, mitochondrial	TGARGLRSIMEK	0.964277	1317.72	3	3.9885	45.207	yes
O95243	Methyl-CpG-binding domain protein 4 (EC 3.2.2.-) (Methyl-CpG-binding endonuclease 1) (Methyl-CpG-binding protein MBD4) (Mismatch-specific DNA N-glycosylase)	RGSEMDNNCSPTRK	0.964275	1593.7	3	1.8323	47.916	yes
Q6ZR52	Zinc finger protein 493	AFSIFSTLTK	0.963896	1113.61	3	0.62346	46.406	yes
Q9P1Y6	PHD and RING finger domain-containing protein 1	EHGRTRSGTR	0.963659	1155.59	3	0.28259	53.751	yes
P40818	Ubiquitin carboxyl-terminal hydrolase 8 （Deubiquitinating enzyme 8） （Ubiquitin isopeptidase Y)(hUBPy) (Ubiquitin thioesterase 8) (Ubiquitin-specific-processing protease 8)	ELYTMMTDK	0.963484	1130.5	3	0.32408	47.302	yes
Q6BDI9	Rab15 effector protein	GVDEWLTTTKMTK	0.963427	1508.75	3	0.090746	43.68	yes
Q9P2E9	Ribosome-binding protein 1 (180 kDa ribosome receptor homolog) (RRp) (ES/130-related protein) (Ribosome receptor protein)	DALNQATSQVESK	0.963418	1389.67	2	0.62696	47.712	yes
Q9UKL3	CASP8-associated protein 2 (FLICE-associated huge protein)	SHYQVGEGSSNEDSRRGR	0.96336	2019.91	3	5.013	58.658	yes
Q8N0X7	Spartin (Spastic paraplegia 20 protein) (Trans-activated by hepatitis C virus core protein 1)	ESEHTGPGWESAR	0.963249	1441.62	3	3.6581	60.55	yes
O75445	Usherin (Usher syndrome type IIa protein) (Usher syndrome type-2A protein)	DFSSVTKERTTFTDTHL	0.963113	1983.95	4	5.8247	44.44	yes
Q96PZ2	Protein FAM111A	AESPEYVHMYTQR	0.962978	1609.72	3	0.17299	52.527	yes
Q8IYR0	Cilia- and flagella-associated protein 206	SGLGSPTDIKTVR	0.96286	1329.73	4	0.73622	40.475	yes
Q5W0Q7	SUMO-specific isopeptidase USPL1 (EC 3.4.22.-) (Ubiquitin-specific peptidase-like protein 1) (USP-like 1)	TEQLKPERVTSQVSNLK	0.962813	1956.06	4	3.1527	47.217	yes
Q6ZNC4	Zinc finger protein 704	TADTKKASR	0.962776	976.53	3	0.09827	59.155	yes
Q5H9T9	Fibrous sheath CABYR-binding protein	SQQTDVIEKK	0.962721	1174.62	3	3.4308	50.791	yes
Q9HCL2	Glycerol-3-phosphate acyltransferase 1, mitochondrial (GPAT-1) (EC 2.3.1.15)	NVAVYAESATYCLVK	0.962655	1629.81	3	4.6594	51.726	yes
Q86T24	Transcriptional regulator Kaiso (Zinc finger and BTB domain-containing protein 33)	RSYVCLTSLR	0.962556	1196.63	3	0.14232	48.405	yes
Q15528	Mediator of RNA polymerase II transcription subunit 22 (Mediator complex subunit 22) (Surfeit locus protein 5) (Surf-5)	SIMDNFTEIIKTAKIEDETQVSR	0.962198	2667.34	4	3.5336	40.315	yes
Q9H0E7	Ubiquitin carboxyl-terminal hydrolase 44 (Deubiquitinating enzyme 44) (Ubiquitin thioesterase 44) (Ubiquitin-specific-processing protease 44)	RFSSKPVVLTEAQK	0.962152	1588.89	3	1.136	43.594	yes
Q9BXL6	Caspase recruitment domain-containing protein 14 (CARD-containing MAGUK protein 2) (Carma 2)	LDVSESGVLMRR	0.961906	1360.71	3	1.7465	46.352	yes
Q92570	Nuclear receptor subfamily 4 group A member 3 (Mitogen-induced nuclear orphan receptor) (Neuron-derived orphan receptor 1) (Nuclear hormone receptor NOR-1)	LSIRSNTAEDK	0.961904	1232.64	2	4.2079	54.343	yes
O15055	Period circadian protein homolog 2 (hPER2) (Circadian clock protein PERIOD 2)	SHYSHESGEQKK	0.961774	1415.64	2	4.0853	59.418	yes
Q8IYD8	Fanconi anemia group M protein(Protein FACM) (ATP-dependent RNA helicase FANCM) (Fanconi anemia-associated polypeptide of 250 kDa)(FAAP250) (Protein Hef ortholog)	ESNIAVNPSTVKK	0.961766	1385.75	3	4.6708	59.155	yes
Q6UXY1	Brain-specific angiogenesis inhibitor 1-associated protein 2-like protein 2 (BAI1-associated protein 2-like protein 2) (Planar intestinal- and kidney-specific BAR domain protein) (Pinkbar)	GTNPFATVK	0.961743	933.492	2	1.9886	51.998	yes
Q12906	Interleukin enhancer-binding factor 3 (Double-stranded RNA-binding protein 76) (DRBP76) (M-phase phosphoprotein 4) (MPP4) (Nuclear factor associated with dsRNA) (NFAR) (Nuclear factor of activated T-cells 90 kDa) (NF-AT-90) (Translational control protein 80) (TCP80)	SIGTANRPMGAGEALR	0.961595	1599.82	3	5.3092	40.278	yes
Q15916	Zinc finger and BTB domain-containing protein 6 (Zinc finger protein 482) (Zinc finger protein with interaction domain)	LLLSCYTGALEVK	0.961535	1408.76	2	3.4717	41.242	yes
Q8TE56	A disintegrin and metalloproteinase with thrombospondin motifs 17 (ADAM-TS 17) (ADAM-TS17) (ADAMTS-17) (EC 3.4.24.-)	TIVSCTRIVNK	0.961306	1232.69	2	0.93131	64.374	yes
P26196	Probable ATP-dependent RNA helicase DDX6 (EC 3.6.4.13) (ATP-dependent RNA helicase p54) (DEAD box protein 6) (Oncogene RCK)	VMATTGGTNLR	0.961274	1119.57	4	3.4047	40.941	yes
Q8IVF5	T-lymphoma invasion and metastasis-inducing protein 2 (TIAM-2) (SIF and TIAM1-like exchange factor)	MAELQLSVVSDPK	0.961261	1415.73	3	5.4175	46.88	yes
O00512	B-cell CLL/lymphoma 9 protein (B-cell lymphoma 9 protein) (Bcl-9) (Protein legless homolog)	RERSISADSFDQR	0.961094	1565.75	4	4.9408	46.88	yes
Q3SXZ3	Zinc finger protein 718	IHTGENPYTCEECGKAFNWSSILTKHK	0.960989	3092.45	5	1.8221	40.668	yes
P42568	Protein AF-9 (ALL1-fused gene from chromosome 9 protein) (Myeloid/lymphoid or mixed-lineage leukemia translocated to chromosome 3 protein) (YEATS domain-containing protein 3)	EHKEKPSKDSR	0.96095	1339.68	3	0.29567	55.314	yes
P49454	Centromere protein F(CENP-F) (AH antigen) (Kinetochore protein CENPF) (Mitosin)	KEMSSIISLNKR	0.960796	1404.78	3	0.87965	47.971	yes
Q5JQC9	A-kinase anchor protein 4 (AKAP-4) (A-kinase anchor protein 82 kDa) (AKAP 82) (hAKAP82) (Major sperm fibrous sheath protein) (HI) (Protein kinase A-anchoring protein 4) (PRKA4)	EGGQKSFLYSELSNKSK	0.960356	1900.95	4	2.0917	41.695	yes
O60682	Musculin (Activated B-cell factor 1)(ABF-1) (Class A basic helix-loop-helix protein 22)(bHLHa22)	LKTSLPWVPPDTKLSK	0.960223	1809.04	4	0.054343	45.347	yes
P17039	Zinc finger protein 30 (Zinc finger protein KOX28)	CGKAFISGSAFVK	0.960085	1313.68	3	5.9549	54.09	yes
P13995	Bifunctional methylenetetrahydrofolate dehydrogenase/cyclohydrolase, mitochondrial [Includes: NAD-dependent methylenetetrahydrofolate dehydrogenase (EC 1.5.1.15); Methenyltetrahydrofolate cyclohydrolase (EC 3.5.4.9)]	MAATSLMSALAAR	0.960031	1292.66	3	4.7347	41.242	yes
Q9NS91	E3 ubiquitin-protein ligase RAD18 (Postreplication repair protein RAD18)(Hhr18)(hRAD18) (RING finger protein 73) (RING-type E3 ubiquitin transferase RAD18)	SKFSPQKEASPAAK	0.960023	1474.78	3	0.28132	53.448	yes
Q96L91	E1A-binding protein p400 (EC 3.6.4.-) (CAG repeat protein 32) (Domino homolog) (hDomino) (Trinucleotide repeat-containing gene 12 protein) (p400 kDa SWI2/SNF2-related protein)	TQFLTTPISQAQK	0.96002	1461.78	3	0.0084498	93.768	yes
P0DKX0	Zinc finger protein 728	AFSKASTLTAHK	0.959995	1260.68	3	4.0111	50.108	yes
Q9ULJ8	Neurabin-1 (Neurabin-I) (Neural tissue-specific F-actin-binding protein I) (Protein phosphatase 1 regulatory subunit 9A)	AGGSEPQDEWGGSKSNR	0.959898	1760.77	3	4.6379	42.716	yes
P35228	Nitric oxide synthase, inducible (EC 1.14.13.39) (Hepatocyte NOS) (HEP-NOS) (Inducible NO synthase) (Inducible NOS) (iNOS) (NOS type II) (Peptidyl-cysteine S-nitrosylase NOS2)	QNVTIMDHHSAAESFMK	0.959659	1944.88	3	0.66416	45.54	yes
P17097	Zinc finger protein 7 (Zinc finger protein HF.16) (Zinc finger protein KOX4)	CNKCTKAFGCSSR	0.959419	1403.61	4	5.7863	41.242	yes
Q9NYF0	Dapper homolog 1(hDPR1) (Dapper antagonist of catenin 1) (Hepatocellular carcinoma novel gene 3 protein)	MKPSPAGTAK	0.959092	986.522	3	0.27314	43.604	yes
Q9UKX7	Nuclear pore complex protein Nup50 (50 kDa nucleoporin) (Nuclear pore-associated protein 60 kDa-like) (Nucleoporin Nup50)	TEDTPDKKMEVASEK	0.958943	1706.8	2	2.2315	45.342	yes
Q96BD5	PHD finger protein 21A (BHC80a) (BRAF35-HDAC complex protein BHC80)	EMHSSLEKVK	0.958837	1186.6	2	5.3461	58.098	yes
O43768	Alpha-endosulfine (ARPP-19e)	YPSLGQKPGGSDFLMKR	0.958787	1879.96	3	0.24209	54.103	yes
Q01082	Spectrin beta chain, non-erythrocytic 1 (Beta-II spectrin) (Fodrin beta chain) (Spectrin, non-erythroid beta chain 1)	HEVSASTQSTPASSR	0.95853	1543.72	2;3;4	0.00048726	153.94	yes
Q96PY0	Putative uncharacterized protein PSMG3-AS1 (PSMG3 antisense RNA 1)	GPGKSWILSPSSMSEPR	0.958385	1814.9	3	4.0909	50.305	yes
Q9BXU7	Ubiquitin carboxyl-terminal hydrolase 26 (EC 3.4.19.12) (Deubiquitinating enzyme 26) (Ubiquitin thioesterase 26) (Ubiquitin-specific-processing protease 26)	SGKYSTFR	0.958317	944.472	3	1.8173	42.083	yes
Q0VAA5	PI-PLC X domain-containing protein 2	IPAPWANTTSVR	0.958243	1311.69	3	1.5443	53.08	yes
Q5TAP6	U3 small nucleolar RNA-associated protein 14 homolog C	TSSSLATVKK	0.958194	1020.58	3	0.18021	51.528	yes
Q5VYK3	Proteasome-associated protein ECM29 homolog (Ecm29)	ALQSQSWKMKAQGAIAMASIAK	0.958015	2318.22	3	4.2007	45.069	yes
Q14562	ATP-dependent RNA helicase DHX8 (EC 3.6.4.13) (DEAH box protein 8) (RNA helicase HRH1)	GHTKQSMDMSPIK	0.957996	1458.7	3	3.3095	48.568	yes
Q8IYX7	Stabilizer of axonemal microtubules 1	FEGSSTTK	0.957438	855.397	3	3.2069	43.769	yes
Q04727	Transducin-like enhancer protein 4 (Grg-4) (Groucho-related protein 4)	SSSVSPSASFR	0.957435	1110.53	3	5.8702	60.167	yes
Q8N910	Putative uncharacterized protein C15orf56	TQSAGEVAKCR	0.95734	1148.56	2	2.8559	50.194	yes
Q96EV2	RNA-binding protein 33 (Proline-rich protein 8) (RNA-binding motif protein 33)	HNTTSQNVSK	0.957216	1114.54	2	1.6366	45.598	yes
Q00587	Cdc42 effector protein 1 (Binder of Rho GTPases 5) (Serum protein MSE55)	DGSFPSEPGLRR	0.957148	1316.65	3	1.3084	48.527	yes
O75592	E3 ubiquitin-protein ligase MYCBP2 (EC 2.3.2.27) (Myc-binding protein 2) (Pam/highwire/rpm-1 protein) (Protein associated with Myc) (RING-type E3 ubiquitin transferase MYCBP2)	GEDGESTKSRR	0.957137	1220.57	3	0.16588	61.78	yes
Q7Z417	Nuclear fragile X mental retardation-interacting protein 2 (82 kDa FMRP-interacting protein) (82-FIP) (Cell proliferation-inducing gene 1 protein) (FMRP-interacting protein 2)	YETGPGGTSRGKPAVGDMLRK	0.957118	2176.11	4	3.6221	54.764	yes
Q8WWK9	Cytoskeleton-associated protein 2 (CTCL tumor antigen se20-10) (Tumor- and microtubule-associated protein)	SHHSNTRDTVK	0.956964	1280.62	3	0.93973	60.691	yes
Q92793	CREB-binding protein	SISPSALQDLLR	0.956774	1298.72	3	2.3868	41.164	yes
Q9BRL6	Serine/arginine-rich splicing factor 8 (Pre-mRNA-splicing factor SRP46) (Splicing factor SRp46) (Splicing factor, arginine/serine-rich 2B)	TSPDSLRRVFEK	0.956728	1433.76	3	1.3247	54.343	yes
Q10713	Mitochondrial-processing peptidase subunit alpha (EC 3.4.24.64) (Alpha-MPP) (P-55)	FETKVTTLDNGLRVASQNK	0.956633	2120.12	4	1.7924	44.998	yes
Q13515	Phakinin (49 kDa cytoskeletal protein) (Beaded filament structural protein 2) (Lens fiber cell beaded filament protein CP 47) (CP47) (Lens fiber cell beaded filament protein CP 49) (CP49) (Lens intermediate filament-like light) (LIFL-L)	SSGLATVPAPGLER	0.956629	1353.73	3	0.19774	60.489	yes
Q6P4R8	Nuclear factor related to kappa-B-binding protein (DNA-binding protein R kappa-B) (INO80 complex subunit G)	IQTVPASHLQQGTASGSSK	0.956483	1895.97	4	0.03323	115.96	yes
Q92674	Centromere protein I (CENP-I) (FSH primary response protein 1) (Follicle-stimulating hormone primary response protein) (Interphase centromere complex protein 19) (Leucine-rich primary response protein 1)	SSVHHSSIPR	0.956294	1105.56	3	0.47152	64.654	yes
O94761	ATP-dependent DNA helicase Q4 (EC 3.6.4.12) (DNA helicase, RecQ-like type 4) (RecQ4) (RTS) (RecQ protein-like 4)	SLCYQLPALLYSR	0.956242	1525.8	3	3.5224	51.771	yes
Q02878	60S ribosomal protein L6 (Large ribosomal subunit protein eL6) (Neoplasm-related protein C140) (Tax-responsive enhancer element-binding protein 107) (TaxREB107)	SAMYSRK	0.956204	841.412	2	0.31556	46.39	yes
Q9Y6Q9	Nuclear receptor coactivator 3 (NCoA-3) (EC 2.3.1.48) (ACTR) (Amplified in breast cancer 1 protein) (AIB-1) (CBP-interacting protein) (pCIP) (Class E basic helix-loop-helix protein 42) (bHLHe42) (Receptor-associated coactivator 3) (RAC-3) (Steroid receptor coactivator protein 3) (SRC-3) (Thyroid hormone receptor activator molecule 1) (TRAM-1)	FSLADGTIVTAQTKSK	0.955977	1665.89	4	1.3931	41.257	yes
Q9NXF1	Testis-expressed protein 10	RLTSQQWRLK	0.955921	1314.75	2	0.081392	67.113	yes
Q9HAU5	Regulator of nonsense transcripts 2 (Nonsense mRNA reducing factor 2) (Up-frameshift suppressor 2 homolog) (hUpf2)	TVRFIGELTK	0.955549	1162.67	3	0.5283	48.284	yes
P59942	Mitochondrial coiled-coil domain protein 1	ASMEEQTSSR	0.955274	1124.48	3	5.5944	40.496	yes
Q5CZC0	Fibrous sheath-interacting protein 2	MFSDKSESNTINFK	0.955266	1646.76	4	0.25995	45.28	yes
Q96M02	Centrosomal protein C10orf90 (Fragile-site associated tumor suppressor homolog)	CISEKEMHMRSK	0.955129	1477.68	3	2.498	48.214	yes
Q6R327	Rapamycin-insensitive companion of mTOR (AVO3 homolog) (hAVO3)	ILNSLTLPNKKHR	0.955114	1532.92	3	0.28996	56.936	yes
Q15003	Condensin complex subunit 2 (Barren homolog protein 1) (Chromosome-associated protein H) (hCAP-H) (Non-SMC condensin I complex subunit H) (XCAP-H homolog)	LSTENKITTK	0.954976	1133.63	2	0.14621	56.013	yes
Q9UBD0	Heat shock transcription factor, X-linked	MEDKRSLSMAR	0.954935	1322.64	3	1.5692	50.791	yes
O15178	Brachyury protein (Protein T)	MSSPGTESAGK	0.95489	1050.47	2	0.2129	40.496	yes
A4UGR9	Xin actin-binding repeat-containing protein 2 (Beta-xin) (Cardiomyopathy-associated protein 3) (Xeplin)	SFFSSVKESQR	0.954852	1300.64	3	5.564	47.844	yes
P14060	3 beta-hydroxysteroid dehydrogenase/Delta 5-->4-isomerase type 1 (3 beta-hydroxysteroid dehydrogenase/Delta 5-->4-isomerase type I) (3-beta-HSD I) (Trophoblast antigen FDO161G) [Includes: 3-beta-hydroxy-Delta(5)-steroid dehydrogenase (EC 1.1.1.145) (3-beta-hydroxy-5-ene steroid dehydrogenase) (Progesterone reductase); Steroid Delta-isomerase (EC 5.3.3.1) (Delta-5-3-ketosteroid isomerase)]	NGGTLYTCALRPMYIYGEGSR	0.954738	2321.09	3	5.7947	50.944	yes
P49916	DNA ligase 3 (EC 6.5.1.1) (DNA ligase III) (Polydeoxyribonucleotide synthase [ATP] 3)	IMFSEMKRVTK	0.954649	1368.73	3	4.9043	48.284	yes
Q8NCE0	tRNA-splicing endonuclease subunit Sen2 (EC 4.6.1.16) (tRNA-intron endonuclease Sen2) (HsSen2)	RQGQDESTVR	0.954475	1174.57	2	1.6969	64.827	yes
O76031	ATP-dependent Clp protease ATP-binding subunit clpX-like, mitochondrial	KSIIKEPESAAEAVK	0.954421	1598.89	2	3.1454	52.172	yes
P29597	Non-receptor tyrosine-protein kinase TYK2 (EC 2.7.10.2)	EITQLSHLGQGTR	0.954409	1438.75	3	5.8631	42.083	yes
Q8NFC6	Biorientation of chromosomes in cell division protein 1-like 1	NNNSQQDIDSENMKQK	0.954208	1891.83	4	2.5123	48.907	yes
Q9UPN3	Microtubule-actin cross-linking factor 1, isoforms 1/2/3/5 (620 kDa actin-binding protein) (ABP620) (Actin cross-linking family protein 7) (Macrophin-1) (Trabeculin-alpha)	ETSSFRMR	0.953938	1012.48	3	4.6181	44.349	yes
B5MCN3	Putative SEC14-like protein 6	QELLRDSFRSCELLLR	0.953872	1977.05	4	0.96546	48.288	yes
Q8TCN5	Zinc finger protein 507	AQQCVSPSSSLCRK	0.953624	1492.71	3	1.8542	51.612	yes
Q9NZM1	Myoferlin (Fer-1-like protein 3)	AEDIPQMDDAFSQTVK	0.953438	1793.81	3	2.5654	54.951	yes
Q5JR59	Microtubule-associated tumor suppressor candidate 2 (Cardiac zipper protein) (Microtubule plus-end tracking protein TIP150) (Tracking protein of 150 kDa)	ASLPSKDTPKGAGR	0.953385	1383.75	3	1.2754	45.28	yes
Q7Z589	BRCA2-interacting transcriptional repressor EMSY	TITVPVSGSPK	0.953094	1084.61	3	0.16676	121.56	yes
O15259	Nephrocystin-1 (Juvenile nephronophthisis 1 protein)	SSWAGKESTLK	0.953075	1192.61	2	3.301	48.998	yes
Q92540	Protein SMG7 (EST1-like protein C) (SMG-7 homolog) (hSMG-7)	TPVSEAR	0.953	758.392	2	0.24868	60.064	yes
Q7LBC6	Lysine-specific demethylase 3B (EC 1.14.11.-) (JmjC domain-containing histone demethylation protein 2B) (Jumonji domain-containing protein 1B) (Nuclear protein 5qNCA)	KSASDSGCDPASKK	0.952958	1379.64	4	1.4233	51.726	yes
Q2MV58	Tectonic-1	YSLTYTDAGEVTK	0.952866	1446.69	2	1.7679	48.351	yes
Q9UIU6	Homeobox protein SIX4 (Sine oculis homeobox homolog 4)	DIADSQPMSAPVASK	0.952835	1515.72	3	0.27239	107.62	yes
Q8NDA8	Maestro heat-like repeat-containing protein family member 1 (HEAT repeat-containing protein 7A)	MTESSMK	0.952631	812.341	2	3.1392	42.19	yes
O15511	Actin-related protein 2/3 complex subunit 5 (Arp2/3 complex 16 kDa subunit) (p16-ARC)	MSKNTVSSAR	0.952516	1079.54	3	4.659	40.727	yes
Q14247	Src substrate cortactin (Amplaxin) (Oncogene EMS1)	NASTFEDVTQVSSAYQK	0.952456	1873.87	3	0.023756	127.05	yes
Q13635	Protein patched homolog 1 (PTC) (PTC1)	DKPIDISQLTK	0.952407	1256.7	2	2.7582	51.252	yes
Q8IWF9	Coiled-coil domain-containing protein 83	LMSVESKKMPIHFQEK	0.952096	1931	4	2.5385	44.252	yes
Q92667	A-kinase anchor protein 1, mitochondrial (A-kinase anchor protein 149 kDa) (AKAP 149) (Dual specificity A-kinase-anchoring protein 1) (D-AKAP-1) (Protein kinase A-anchoring protein 1) (PRKA1) (Spermatid A-kinase anchor protein 84) (S-AKAP84)	TYVSCLK	0.951536	812.41	3	0.86796	60.799	yes
O60248	Protein SOX-15 (Protein SOX-12) (Protein SOX-20)	RPMNAFMVWSSAQR	0.951508	1679.8	3	4.245	45.357	yes
Q6ZQQ6	WD repeat-containing protein 87 (Testis development protein NYD-SP11)	LSKDVTYSVLTDGANR	0.951395	1737.89	4	1.0391	44.925	yes
Q6ZQQ6	WD repeat-containing protein 87 (Testis development protein NYD-SP11)	SQAVAWMKSKTEDMVEK	0.9513	1966.95	3	4.2082	40.983	yes
O15457	MutS protein homolog 4(hMSH4)	GLEYIEQLCIAEFSTVLMEVQSK	0.951082	2629.3	4	2.3771	42.639	yes
Q9UL18	Protein argonaute-1 (Argonaute1) (hAgo1) (Argonaute RISC catalytic component 1) (Eukaryotic translation initiation factor 2C 1) (eIF-2C 1) (eIF2C 1) (Putative RNA-binding protein Q99)	FTADELQILTYQLCHTYVR	0.950639	2313.15	4	4.4724	41.695	yes
Q9UBT2	SUMO-activating enzyme subunit 2 (Anthracycline-associated resistance ARX) (Ubiquitin-like 1-activating enzyme E1B) (Ubiquitin-like modifier-activating enzyme 2)	MHIFSMNMKSRFDIK	0.950368	1883.92	3	0.059877	52.52	yes
O75665	Oral-facial-digital syndrome 1 protein (Protein 71-7A)	RLSSTPLPKAK	0.950332	1196.72	2	5.6339	43.297	yes
Q8TC84	Fibronectin type 3 and ankyrin repeat domains protein 1	ILVSNGTDVNLKNGSGK	0.950247	1714.92	3	5.6241	48.899	yes
Q96BY6	Dedicator of cytokinesis protein 10 (Zizimin-3)	GVDQTCTRVISK	0.950218	1305.67	3	1.323	51.252	yes
Q96J88	Epithelial-stromal interaction protein 1	NRVVNSGLGASPASRPTR	0.950218	1837.99	3	5.8181	43.216	yes
Q08170	Serine/arginine-rich splicing factor 4 (Pre-mRNA-splicing factor SRP75) (SRP001LB) (Splicing factor, arginine/serine-rich 4)	EKSRSPSK	0.950217	917.493	3	2.819	46.352	yes
Q9Y6K5	2'-5'-oligoadenylate synthase 3 ((2-5')oligo(A) synthase 3) (2-5A synthase 3) (EC 2.7.7.84) (p100 OAS) (p100OAS)	VSKGGSFGRGTDLR	0.94971	1435.75	3	5.0805	51.726	yes
Q96SB8	Structural maintenance of chromosomes protein 6 (SMC protein 6) (SMC-6) (hSMC6)	SATGSVVSTRK	0.949688	1091.59	3	0.27134	44.639	yes
P46199	Translation initiation factor IF-2, mitochondrial (IF-2(Mt)) (IF-2Mt) (IF2(mt))	GLVTTAIIQRGTLRK	0.949561	1625.99	2	0.35333	62.162	yes
Q70EK8	Inactive ubiquitin carboxyl-terminal hydrolase 53 (Inactive ubiquitin-specific peptidase 53)	TGLPFHVDNSASGKR	0.949515	1584.8	3	0.044757	44.925	yes
Q4ZHG4	Fibronectin type III domain-containing protein 1 (Activation-associated cDNA protein) (Expressed in synovial lining protein)	RPTTTVRTTTR	0.949307	1288.72	3	3.7785	54.486	yes
O00203	AP-3 complex subunit beta-1 (Adaptor protein complex AP-3 subunit beta-1) (Adaptor-related protein complex 3 subunit beta-1) (Beta-3A-adaptin) (Clathrin assembly protein complex 3 beta-1 large chain)	MVSIQITLNNTTDR	0.948634	1604.82	3	1.8929	51.135	yes
Q9BYV8	Centrosomal protein of 41 kDa (Cep41) (Testis-specific gene A14 protein)	LDTGNSMTK	0.948491	965.449	3	1.5375	53.237	yes
Q4AC94	C2 domain-containing protein 3	EELMVKSSFLSSPER	0.948048	1737.86	3	3.5666	43.03	yes
Q9BVS4	Serine/threonine-protein kinase RIO2 (EC 2.7.11.1) (RIO kinase 2)	LIAWERTKTVQGYR	0.947929	1719.94	3	0.51202	50.04	yes
P56192	Methionine--tRNA ligase, cytoplasmic (Methionyl-tRNA synthetase)(MetRS)	DALRSILTISR	0.947863	1243.72	3	0.51265	56.548	yes
Q9Y6D5	Brefeldin A-inhibited guanine nucleotide-exchange protein 2 (Brefeldin A-inhibited GEP 2) (ADP-ribosylation factor guanine nucleotide-exchange factor 2)	MQESQTKSMFVSRALEK	0.947628	1998.99	3	1.3009	57.288	yes
O94868	F-BAR and double SH3 domains protein 2 (Carom) (SH3 multiple domains protein 3)	SMYPVWKSFLEGTMQVAQSR	0.946945	2344.13	4	2.4779	62.709	yes
Q96SQ5	Zinc finger protein 587	SHLTEHQRLHTGERPYNCR	0.946689	2333.12	3	1.6795	40.493	yes
Q9UIF8	Bromodomain adjacent to zinc finger domain protein 2B (hWALp4)	TQHHSHPAKSLVEQFR	0.946584	1900.97	3	1.7816	43.592	yes
Q02363	DNA-binding protein inhibitor ID-2 (Class B basic helix-loop-helix protein 26) (bHLHb26) (Inhibitor of DNA binding 2) (Inhibitor of differentiation 2)	AFSPVRSVR	0.945024	1017.57	3	0.54831	53.08	yes
P49792	E3 SUMO-protein ligase RanBP2 (EC 2.3.2.-) (358 kDa nucleoporin) (E3 SUMO-protein transferase RanBP2) (Nuclear pore complex protein Nup358) (Nucleoporin Nup358) (Ran-binding protein 2) (RanBP2) (p270)	EGFSIPVSADGFK	0.944657	1352.66	3	0.028366	126.07	yes
P35318	ADM [Cleaved into: Adrenomedullin (AM); Proadrenomedullin N-20 terminal peptide (ProAM N-terminal 20 peptide) (PAMP) (ProAM-N20)]	SKISPQGYGRR	0.944318	1247.67	3	5.8102	52.167	yes
Q9UKJ3	G patch domain-containing protein 8	RHSSHRSSR	0.943947	1108.56	3	0.85856	47.96	yes
Q9BYV7	Beta,beta-carotene 9',10'-oxygenase (EC 1.13.11.71) (B-diox-II) (Beta-carotene dioxygenase 2)	GKPSYYHSFGMTR	0.943841	1529.71	3	3.4056	46.88	yes
Q9H0B3	IQ domain-containing protein N	TNKARAPETPLSR	0.943789	1439.78	3	2.1513	47.039	yes
H3BN30	Uncharacterized protein C16orf97	TSKLFLCGQPSPR	0.943675	1432.75	3;4	3.2251	63.29	yes
P51610	Host cell factor 1 (HCF) (HCF-1) (C1 factor) (CFF) (VCAF) (VP16 accessory protein) [Cleaved into: HCF N-terminal chain 1; HCF N-terminal chain 2; HCF N-terminal chain 3; HCF N-terminal chain 4; HCF N-terminal chain 5; HCF N-terminal chain 6; HCF C-terminal chain 1; HCF C-terminal chain 2; HCF C-terminal chain 3; HCF C-terminal chain 4; HCF C-terminal chain 5; HCF C-terminal chain 6]	TIPMSAIITQAGATGVTSSPGIK	0.943311	2200.18	2;4	0.026193	112.58	yes
Q8TDR0	TRAF3-interacting protein 1 (Interleukin-13 receptor alpha 1-binding protein 1) (Intraflagellar transport protein 54 homolog) (Microtubule-interacting protein associated with TRAF3) (MIP-T3)	ASLTSRSQELDNK	0.943251	1447.73	3	2.0977	41.242	yes
P51610	Host cell factor 1 (HCF) (HCF-1) (C1 factor) (CFF) (VCAF) (VP16 accessory protein) [Cleaved into: HCF N-terminal chain 1; HCF N-terminal chain 2; HCF N-terminal chain 3; HCF N-terminal chain 4; HCF N-terminal chain 5; HCF N-terminal chain 6; HCF C-terminal chain 1; HCF C-terminal chain 2; HCF C-terminal chain 3; HCF C-terminal chain 4; HCF C-terminal chain 5; HCF C-terminal chain 6]	SPITIITTK	0.943231	972.586	3	0.017127	145.23	yes
Q9UPW5	Cytosolic carboxypeptidase 1 (EC 3.4.17.-) (ATP/GTP-binding protein 1) (Nervous system nuclear protein induced by axotomy protein 1 homolog)	KDCSLPLTVLTCAK	0.942858	1490.78	3	5.3981	54.276	yes
Q15306	Interferon regulatory factor 4 (IRF-4) (Lymphocyte-specific interferon regulatory factor) (LSIRF) (Multiple myeloma oncogene 1) (NF-EM5)	GGEFGMSAVSCGNGKLR	0.9427	1668.77	3	1.2121	61.87	yes
Q8TCU4	Alstrom syndrome protein 1	SSSRLGVK	0.942608	832.477	4	1.6763	57.885	yes
Q86UR5	Regulating synaptic membrane exocytosis protein 1 (Rab-3-interacting molecule 1)(RIM 1) (Rab-3-interacting protein 2)	ISSFTPKMQGR	0.942471	1250.64	3	0.30719	42.426	yes
Q8TF01	Arginine/serine-rich protein PNISR (PNN-interacting serine/arginine-rich protein) (SR-related protein) (SR-rich protein) (Serine/arginine-rich-splicing regulatory protein 130) (SRrp130) (Splicing factor, arginine/serine-rich 130) (Splicing factor, arginine/serine-rich 18)	SRSVEKSQR	0.942462	1075.57	3	4.8547	67.214	yes
Q86W56	Poly(ADP-ribose) glycohydrolase (EC 3.2.1.143)	STQYLNQHQTAAMCKWQNEGK	0.942409	2465.12	3	4.1243	40.968	yes
Q9NYJ8	TGF-beta-activated kinase 1 and MAP3K7-binding protein 2 (Mitogen-activated protein kinase kinase kinase 7-interacting protein 2) (TAK1-binding protein 2) (TAB-2) (TGF-beta-activated kinase 1-binding protein 2)	VVVTQPNTK	0.942409	984.56	3	0.10578	61.419	yes
Q96RN5	Mediator of RNA polymerase II transcription subunit 15 (Activator-recruited cofactor 105 kDa component) (ARC105) (CTG repeat protein 7a) (Mediator complex subunit 15) (Positive cofactor 2 glutamine/Q-rich-associated protein) (PC2 glutamine/Q-rich-associated protein) (TPA-inducible gene 1 protein) (TIG-1) (Trinucleotide repeat-containing gene 7 protein)	DVSGQETDWR	0.941926	1191.52	2	3.9277	52.576	yes
Q96RY5	Protein cramped-like (Cramped chromatin regulator homolog 1) (Hematological and neurological expressed 1-like protein)	MTVKLGDGGSGEDGLK	0.941909	1562.76	2	1.3877	40.432	yes
Q03001	Dystonin (230 kDa bullous pemphigoid antigen) (230/240 kDa bullous pemphigoid antigen) (Bullous pemphigoid antigen 1) (BPA) (Bullous pemphigoid antigen) (Dystonia musculorum protein) (Hemidesmosomal plaque protein)	TIIQLKPRNSDCPLK	0.94171	1724.96	4	1.1745	57.788	yes
Q9P266	Junctional protein associated with coronary artery disease (JCAD)	TPSVAGSEKR	0.941681	1030.54	3	4.997	57.175	yes
Q12955	Ankyrin-3 (ANK-3) (Ankyrin-G)	SNINMYSSSLPFK	0.941612	1486.71	3	4.1826	47.039	yes
Q6N021	Methylcytosine dioxygenase TET2	SAPSRTKQTENASQAK	0.941578	1702.86	3	0.5975	47.639	yes
Q96M29	Tektin-5	LVNEVFTIDDTLQTLKLR	0.941573	2117.17	3	5.6218	45.084	yes
Q9HC21	Mitochondrial thiamine pyrophosphate carrier (Mitochondrial uncoupling protein 1) (Solute carrier family 25 member 19)	FQVAVAGSVSGLVTR	0.94127	1489.83	4	1.8152	40.186	yes
Q8N0X2	Sperm-associated antigen 16 protein (Pf20 protein homolog)	GDCILTFEGHSR	0.941189	1333.61	3	1.4523	45.347	yes
Q99698	Lysosomal-trafficking regulator (Beige homolog)	DKAASESIRVNR	0.940892	1344.71	3	0.24998	55.335	yes
P32780	General transcription factor IIH subunit 1 (Basic transcription factor 2 62 kDa subunit) (BTF2 p62) (General transcription factor IIH polypeptide 1) (TFIIH basal transcription factor complex p62 subunit)	FTISHMYADIKCQK	0.940872	1683.81	3	3.582	51.726	yes
P10636	Microtubule-associated protein tau (Neurofibrillary tangle protein) (Paired helical filament-tau) (PHF-tau)	GADGKTKIATPR	0.940636	1213.68	2	4.1086	41.495	yes
Q9NUX5	Protection of telomeres protein 1 (hPot1) (POT1-like telomere end-binding protein)	IWTTKNQK	0.940538	1017.56	3	5.7801	62.464	yes
Q8N4C6	Ninein (hNinein) (Glycogen synthase kinase 3 beta-interacting protein) (GSK3B-interacting protein)	LKSLMASEVDDHHAAIER	0.940489	2021	4	0.38156	42.639	yes
Q7Z2Z1	Treslin (TopBP1-interacting checkpoint and replication regulator) (TopBP1-interacting, replication-stimulating protein)	RAVGCGAGSSSGR	0.940239	1163.55	3	4.7945	59.155	yes
P22694	cAMP-dependent protein kinase catalytic subunit beta (PKA C-beta) (EC 2.7.11.11)	IVSGKVRFPSHFSSDLK	0.940072	1903.03	4	1.7924	40.396	yes
Q8TB72	Pumilio homolog 2 (Pumilio-2)	RESLSTSSDLYK	0.939923	1384.68	3	1.6232	44.847	yes
Q17RS7	Flap endonuclease GEN homolog 1 (EC 3.1.-.-)	SVCLDRHSSDEQSAPVFGK	0.939537	2060.96	3	4.8509	40.533	yes
P17019	Zinc finger protein 708 (Zinc finger protein 15) (Zinc finger protein 15-like 1) (Zinc finger protein KOX8)	CVTTTQSKIVQCDK	0.939274	1552.76	3	2.8282	46.88	yes
Q13416	Origin recognition complex subunit 2	VVSAPVGKETPSKR	0.939243	1453.83	3	0.97072	51.726	yes
Q6IMN6	Caprin-2 (C1q domain-containing protein 1) (Cytoplasmic activation/proliferation-associated protein 2) (Gastric cancer multidrug resistance-associated protein) (Protein EEG-1) (RNA granule protein 140)	SKPSPSQWKQDTPK	0.939224	1612.82	3	1.5546	52.576	yes
Q9UBU7	Protein DBF4 homolog A (Activator of S phase kinase) (Chiffon homolog A) (DBF4-type zinc finger-containing protein 1)	SLKTDNRPEKSK	0.939009	1401.76	4	4.8561	63.29	yes
O15231	Zinc finger protein 185 (LIM domain protein ZNF185) (P1-A)	KSNSTAAQEDAK	0.938736	1248.59	2	2.4387	49.632	yes
Q14008	Cytoskeleton-associated protein 5 (Colonic and hepatic tumor overexpressed gene protein)(Ch-TOG)	SMSGHPEAAQMVRR	0.938572	1555.73	3	3.0972	56.956	yes
Q9NTI2	Phospholipid-transporting ATPase IB (EC 3.6.3.1) (ATPase class I type 8A member 2) (ML-1) (P4-ATPase flippase complex alpha subunit ATP8A2)	SRATSVGDQLEAPAR	0.938336	1556.79	3	0.55321	46.925	yes
Q9UPT5	Exocyst complex component 7 (Exocyst complex component Exo70)	NMVSILSSFESR	0.938272	1368.67	2	3.9156	51.286	yes
Q32MZ4	Leucine-rich repeat flightless-interacting protein 1 (LRR FLII-interacting protein 1) (GC-binding factor 2) (TAR RNA-interacting protein)	NMPGLSAATLASLGGTSSRR	0.937596	1946	4	1.9487	43.794	yes
O14980	Exportin-1 (Exp1) (Chromosome region maintenance 1 protein homolog)	ETLVYLTHLDYVDTERIMTEK	0.937264	2568.28	3	0.29883	49.036	yes
O43889	Cyclic AMP-responsive element-binding protein 3 (CREB-3) (cAMP-responsive element-binding protein 3) (Leucine zipper protein) (Luman) (Transcription factor LZIP-alpha) [Cleaved into: Processed cyclic AMP-responsive element-binding protein 3 (N-terminal Luman) (Transcriptionally active form)]	VYVGGLESRVLKYTAQNMELQNK	0.93725	2639.37	4	2.0966	52.432	yes
P23025	DNA repair protein complementing XP-A cells (Xeroderma pigmentosum group A-complementing protein)	KTCTMCGHELTYEKM	0.937245	1773.76	3	2.0014	41.227	yes
Q6ZMW3	Echinoderm microtubule-associated protein-like 6 (EMAP-6) (Echinoderm microtubule-associated protein-like 5-like)	SALSTSSK	0.937221	779.403	3	3.5058	43.808	yes
Q9BX82	Zinc finger protein 471 (EZFIT-related protein 1)	ETITKETEFKYTK	0.937189	1616.83	2	5.5539	40.242	yes
Q99959	Plakophilin-2	NMSSAGADGRKAMR	0.93674	1450.68	2	5.6557	59.345	yes
Q9GZN2	Homeobox protein TGIF2 (5'-TG-3'-interacting factor 2) (TGF-beta-induced transcription factor 2) (TGFB-induced factor 2)	MSDSDLGEDEGLLSLAGKRK	0.936668	2120.04	4	3.3707	43.37	yes
Q8IWI9	MAX gene-associated protein (MAX dimerization protein 5)	LTEGQGSEIQPGDLDPLSR	0.93658	2010.99	3	5.1729	41.422	yes
Q9UPA5	Protein bassoon (Zinc finger protein 231)	SRLPRHSDSGSDSK	0.936545	1527.74	2	1.2765	52.891	yes
[truncated: 1,294 more rows]
