# Supplementary material for: A triarylphosphine–trimethylpiperidine reagent for the one-step derivatization and enrichment of protein post-translational modifications and identification by mass spectrometry
Source: Royal Society of Chemistry journal article supplement (doi:10.1039/c8cc08416e), 2018-01-01
Supplement: c8cc08416e3.xlsx [file c8cc08416e3.xlsx]

## Sheet: Sheet1
O-GlcNAc Proteins	Protein names	|Mass error [ppm]|	Charge	Localization prob	Score	O-GlcNAc Peptides	Modification sites in Protein	Amino acid	DFIs
A0A087WXM9	Meiosis-specific kinetochore protein	0.98617	2	0.999805	74.165	TCPSTPEKTK	255	T	yes
A0A087WXM9	Meiosis-specific kinetochore protein	3.1138	3	0.865223	52.495	TNSSTPGKKNR	262	S	yes
A0A087WXM9	Meiosis-specific kinetochore protein	2.3725	3	0.452695	47.712	TNSSTPGKK	263	S	yes
A0A087WXM9	Meiosis-specific kinetochore protein	2.3725	3	0.452695	47.712	TNSSTPGKK	262	S	yes
A2RRP1	Neuroblastoma-amplified sequence (Neuroblastoma-amplified gene protein)	0.2898	3	0.999991	70.889	TLGLLRMLSVK	307	S	yes
A3KMH1	von Willebrand factor A domain-containing protein 8	0.7804	3	1	86.014	KELDSWKIVR	226	S	yes
A3KMH1	von Willebrand factor A domain-containing protein 8	0.2154	3	0.999747	71.548	SLNFTEECASWR	1098	T	yes
A3KN83	Protein strawberry notch homolog 1 (Monocyte protein 3) (MOP-3)	2.2816	3	0.813273	42.083	ISSKHNGSVK	386	S	yes
A3KN83	Protein strawberry notch homolog 1 (Monocyte protein 3) (MOP-3)	2.3756	3	0.536334	41.383	YGKISSKHNGSVK	391	S	yes
A4D256	Dual specificity protein phosphatase CDC14C (EC 3.1.3.16) (EC 3.1.3.48) (CDC14 cell division cycle 14 homolog C)	1.5235	2	0.963117	41.283	NEVSSECGKK	6	S	yes
A4FU49	SH3 domain-containing protein 21	1.8889	4	0.99879	44.44	KLTDIWEELKSEK	600	T	yes
A4UGR9	Xin actin-binding repeat-containing protein 2 (Beta-xin) (Cardiomyopathy-associated protein 3) (Xeplin)	0.82206	3	0.923786	122.69	NELSQSPKK	2967	S	yes
A4UGR9	Xin actin-binding repeat-containing protein 2 (Beta-xin) (Cardiomyopathy-associated protein 3) (Xeplin)	4.9277	3	0.981159	71.692	SFFSSVK	2754	S	yes
A5D8V7	Coiled-coil domain-containing protein 151	3.2274	2	0.502322	48.602	MTSPLCR	2	T	yes
A5YKK6	CCR4-NOT transcription complex subunit 1 (CCR4-associated factor 1) (Negative regulator of transcription subunit 1 homolog) (NOT1H) (hNOT1)	2.0808	3	0.900917	89.827	DSTIKRER	880	T	yes
A6H8Y1	Transcription factor TFIIIB component B'' homolog (Transcription factor IIIB 150) (TFIIIB150) (Transcription factor-like nuclear regulator)	0.17581	3	0.999997	109.79	SVKNHSLK	385	S	yes
A6H8Y1	Transcription factor TFIIIB component B'' homolog (Transcription factor IIIB 150) (TFIIIB150) (Transcription factor-like nuclear regulator)	1.1131	2	0.500026	70.728	GSTASNPQR	22	S	yes
A6H8Y1	Transcription factor TFIIIB component B'' homolog (Transcription factor IIIB 150) (TFIIIB150) (Transcription factor-like nuclear regulator)	1.1131	2	0.499925	70.728	GSTASNPQR	23	T	yes
A6H8Y1	Transcription factor TFIIIB component B'' homolog (Transcription factor IIIB 150) (TFIIIB150) (Transcription factor-like nuclear regulator)	0.57325	3	1	58.071	ANKLNQVPILRTR	809	T	yes
A6H8Y1	Transcription factor TFIIIB component B'' homolog (Transcription factor IIIB 150) (TFIIIB150) (Transcription factor-like nuclear regulator)	5.0453	4	0.993821	41.164	PVDEMETDLNATGR	1010	T	yes
A6NC57	Ankyrin repeat domain-containing protein 62	5.4456	2	0.935839	113.71	TSNEKSK	361	S	yes
A6NDG6	Glycerol-3-phosphate phosphatase (G3PP) (EC 3.1.3.21) (Aspartate-based ubiquitous Mg(2+)-dependent phosphatase) (AUM) (EC 3.1.3.48) (Phosphoglycolate phosphatase) (PGP)	2.1393	4	0.913818	42.317	LGFITNNSSKTR	73	T	yes
A6NE01	Protein FAM186A	2.6212	3	0.988523	86.467	MATYAKTIEIR	115	T	yes
A6NE01	Protein FAM186A	2.4116	3	0.467985	53.754	FSTSFLDEKK	182	S	yes
A6NGG3	Putative uncharacterized protein C9orf92	3.893	3	1	101.56	KMQPSPTGKGGK	44	T	yes
A6NGG3	Putative uncharacterized protein C9orf92	3.893	3	1	101.56	KMQPSPTGKGGK	42	S	yes
A6NGG3	Putative uncharacterized protein C9orf92	1.8342	2	0.894537	49.31	QPSPTGKGGK	43	T	yes
A6NHR9	Structural maintenance of chromosomes flexible hinge domain-containing protein 1 (SMC hinge domain-containing protein 1) (EC 3.6.1.-)	2.2176	2,3	1	80.239	QQQMAALTK	1627	T	yes
A6NIV6	Leucine-rich repeat and IQ domain-containing protein 4 (Leucine-rich repeat-containing protein 64)	1.2189	3	0.986231	74.89	MSKDIKSVEHSPK	7	S	yes
A6NIV6	Leucine-rich repeat and IQ domain-containing protein 4 (Leucine-rich repeat-containing protein 64)	2.4445	2	0.972084	40.715	DIKSVEHSPK	11	S	yes
A6NKC9	SH2 domain-containing protein 7	0.52936	3	0.999866	51.276	KMEDSLKQLSLGR	5	S	yes
A7E2V4	Zinc finger SWIM domain-containing protein 8	4.7544	2	0.995919	44.614	ALPSRPGASR	514	S	yes
A8CG34	Nuclear envelope pore membrane protein POM 121C (Nuclear pore membrane protein 121-2) (POM121-2) (Pore membrane protein of 121 kDa C)	0.39705	3	0.989958	56.225	APPTLQAETATK	658	T	yes
A8CG34	Nuclear envelope pore membrane protein POM 121C (Nuclear pore membrane protein 121-2) (POM121-2) (Pore membrane protein of 121 kDa C)	4.4731	3	0.999896	42.843	APPTLQAETATK	665	T	yes
A8MUU9	Putative uncharacterized protein ENSP00000383309	0.94119	5	0.984134	50.397	MPPTASLTRSPPTASQTR	17	T	yes
A8MUU9	Putative uncharacterized protein ENSP00000383309	2.2504	3	0.867111	46.481	ASLTRTPPTASRTR	96	S	yes
A8MWD9	Putative small nuclear ribonucleoprotein G-like protein 15	5.2159	3	1	48.532	KFSLKLNGGR	18	S	yes
B1AJZ9	Forkhead-associated domain-containing protein 1 (FHA domain-containing protein 1)	0.32095	3	0.999655	89.266	TLGSLMNIK	1255	S	yes
B1AJZ9	Forkhead-associated domain-containing protein 1 (FHA domain-containing protein 1)	0.51152	3	0.972466	71.601	ITQVTEDNINFQQK	528	T	yes
B1AJZ9	Forkhead-associated domain-containing protein 1 (FHA domain-containing protein 1)	0.89748	4	0.856787	61.097	SQISALQKGYSK	304	S	yes
B1AJZ9	Forkhead-associated domain-containing protein 1 (FHA domain-containing protein 1)	0.89748	4	0.999997	61.097	SQISALQKGYSK	314	S	yes
B3KS81	Serine/arginine repetitive matrix protein 5	1.2091	3	0.999964	84.734	STSTKRAPSNR	75	S	yes
B3KS81	Serine/arginine repetitive matrix protein 5	3.0123	4	0.698664	64.798	STSTKRAPSNR	69	S	yes
B3KS81	Serine/arginine repetitive matrix protein 5	3.102	2	0.999859	46.318	SQSRSPSEEREHR	552	S	yes
B7Z368	Uncharacterized protein C10orf142	5.0192	2,3	1	58.246	RPTVCMGR	64	T	yes
H3BN30	Uncharacterized protein C16orf97	2.09	3	0.954472	62.799	TSKLFLCGQPSPR	70	T	yes
H3BN30	Uncharacterized protein C16orf97	2.6649	3	0.499998	62.799	TSKLFLCGQPSPR	69	S	yes
H3BN30	Uncharacterized protein C16orf97	0.66552	2	1	49.31	LFLCGQPSPR	79	S	yes
H7BZ55	Putative ciliary rootlet coiled-coil protein 2	4.7187	3	1	84.817	VVSEQLQAR	125	S	yes
H7BZ55	Putative ciliary rootlet coiled-coil protein 2	0.23385	3	1	48.616	KANDALGRELAGMTGSVQR	198	S	yes
O00203	AP-3 complex subunit beta-1 (Adaptor protein complex AP-3 subunit beta-1) (Adaptor-related protein complex 3 subunit beta-1) (Beta-3A-adaptin) (Clathrin assembly protein complex 3 beta-1 large chain)	2.2088	3	1	47.288	AKQENSAK	671	S	yes
O00291	Huntingtin-interacting protein 1 (HIP-1) (Huntingtin-interacting protein I) (HIP-I)	0.56356	3	1	80.318	AINTQEVAVK	50	T	yes
O00338	Sulfotransferase 1C2 (ST1C2) (EC 2.8.2.-) (Sulfotransferase 1C1) (SULT1C#1) (humSULTC2)	3.6968	2	0.990403	94.309	ALTSDLGK	4	T	yes
O00338	Sulfotransferase 1C2 (ST1C2) (EC 2.8.2.-) (Sulfotransferase 1C1) (SULT1C#1) (humSULTC2)	0.13984	3	0.5	57.174	MALTSDLGK	5	S	yes
O00338	Sulfotransferase 1C2 (ST1C2) (EC 2.8.2.-) (Sulfotransferase 1C1) (SULT1C#1) (humSULTC2)	0.13984	3	0.5	57.174	MALTSDLGK	4	T	yes
O00443	Phosphatidylinositol 4-phosphate 3-kinase C2 domain-containing subunit alpha (PI3K-C2-alpha) (PtdIns-3-kinase C2 subunit alpha) (EC 2.7.1.154) (Phosphoinositide 3-kinase-C2-alpha)	0.77508	4	0.5	60.301	TYSFRQDGRIK	1417	S	yes
O00443	Phosphatidylinositol 4-phosphate 3-kinase C2 domain-containing subunit alpha (PI3K-C2-alpha) (PtdIns-3-kinase C2 subunit alpha) (EC 2.7.1.154) (Phosphoinositide 3-kinase-C2-alpha)	0.77508	4	0.5	60.301	TYSFRQDGRIK	1415	T	yes
O00507	Probable ubiquitin carboxyl-terminal hydrolase FAF-Y (EC 3.4.19.12) (Deubiquitinating enzyme FAF-Y) (Fat facets protein-related, Y-linked) (Ubiquitin thioesterase FAF-Y) (Ubiquitin-specific protease 9, Y chromosome) (Ubiquitin-specific-processing protease FAF-Y)	0.78427	3	0.983699	42.629	SHSARMTLAK	2461	S	yes
O00555	Voltage-dependent P/Q-type calcium channel subunit alpha-1A (Brain calcium channel I) (BI) (Calcium channel, L type, alpha-1 polypeptide isoform 4) (Voltage-gated calcium channel subunit alpha Cav2.1)	0.84006	3	0.970482	61.821	GNNLSTISDTSPMK	2120	S	yes
O00566	U3 small nucleolar ribonucleoprotein protein MPP10 (M phase phosphoprotein 10)	1.6807	4	0.333333	59.372	MAPVITEETTLQLEDIIKQRIR	418	T	yes
O00566	U3 small nucleolar ribonucleoprotein protein MPP10 (M phase phosphoprotein 10)	1.6807	4	0.333333	59.372	MAPVITEETTLQLEDIIKQRIR	421	T	yes
O00566	U3 small nucleolar ribonucleoprotein protein MPP10 (M phase phosphoprotein 10)	1.6807	4	0.333333	59.372	MAPVITEETTLQLEDIIKQRIR	422	T	yes
O00635	E3 ubiquitin-protein ligase TRIM38 (EC 2.3.2.27) (RING finger protein 15) (RING-type E3 ubiquitin transferase TRIM38) (Tripartite motif-containing protein 38) (Zinc finger protein RoRet)	3.0237	4	1	42.813	LKQLEDRCTEQK	155	T	yes
O14513	Nck-associated protein 5 (NAP-5) (Peripheral clock protein)	1.0038	3	1	117.89	SLQQQFSR	113	S	yes
O14543	Suppressor of cytokine signaling 3 (SOCS-3) (Cytokine-inducible SH2 protein 3) (CIS-3) (STAT-induced STAT inhibitor 3) (SSI-3)	3.8454	3	1	54.471	FPAAGMSR	13	S	yes
O14545	TRAF-type zinc finger domain-containing protein 1 (Protein FLN29)	2.1129	3	1	92.051	KNIGMCPTCK	42	T	yes
O14559	Rho GTPase-activating protein 33 (Rho-type GTPase-activating protein 33) (Sorting nexin-26) (Tc10/CDC42 GTPase-activating protein)	3.658	3	1	59.35	TFFALGR	593	T	yes
O14757	Serine/threonine-protein kinase Chk1 (EC 2.7.11.1) (CHK1 checkpoint homolog) (Cell cycle checkpoint kinase) (Checkpoint kinase-1)	5.7905	3	0.947596	47.039	SCMNQVTISTTDR	417	T	yes
O14775	Guanine nucleotide-binding protein subunit beta-5 (Gbeta5) (Transducin beta chain 5)	2.9045	3	1	49.189	KTLKGHGNK	101	T	yes
O14795	Protein unc-13 homolog B (Munc13-2) (munc13)	5.1677	3	0.999818	65.627	ELSHLSKLK	1333	S	yes
O14795	Protein unc-13 homolog B (Munc13-2) (munc13)	0.70784	3	1	60.518	CSECGVK	509	S	yes
O14795	Protein unc-13 homolog B (Munc13-2) (munc13)	1.9639	3	0.983009	47.559	ELSHLSKLKDHMVR	1330	S	yes
O14920	Inhibitor of nuclear factor kappa-B kinase subunit beta (I-kappa-B-kinase beta) (IKK-B) (IKK-beta) (IkBKB) (EC 2.7.11.10) (I-kappa-B kinase 2) (IKK2) (Nuclear factor NF-kappa-B inhibitor kinase beta) (NFKBIKB)	0.25175	2	0.943479	47.915	NSMASMSQQLK	471	S	yes
O14925	Mitochondrial import inner membrane translocase subunit Tim23	2.751	3	0.999994	75.589	ETQNMAWSKPR	103;103	T	yes
O14964	Hepatocyte growth factor-regulated tyrosine kinase substrate (Hrs) (Protein pp110)	1.3283	4	0.195493	51.236	AEPMPSASSAPPASSLYSSPVNSSAPLAEDIDPELAR	310	S	yes
O14964	Hepatocyte growth factor-regulated tyrosine kinase substrate (Hrs) (Protein pp110)	1.3283	4	0.195493	51.236	AEPMPSASSAPPASSLYSSPVNSSAPLAEDIDPELAR	309	S	yes
O14964	Hepatocyte growth factor-regulated tyrosine kinase substrate (Hrs) (Protein pp110)	1.3283	4	0.195493	51.236	AEPMPSASSAPPASSLYSSPVNSSAPLAEDIDPELAR	306	S	yes
O14964	Hepatocyte growth factor-regulated tyrosine kinase substrate (Hrs) (Protein pp110)	1.3283	4	0.195493	51.236	AEPMPSASSAPPASSLYSSPVNSSAPLAEDIDPELAR	305	S	yes
O14980	Exportin-1 (Exp1) (Chromosome region maintenance 1 protein homolog)	4.3658	4	1	43.124	TRWKILPR	89	T	yes
O14990	Protein phosphatase inhibitor 2 family member C (PPP1R2 family member B) (Protein phosphatase 1, regulatory subunit 2 pseudogene 9) (Type-1 protein phosphatase inhibitor 4) (I-4)	3.7859	3	0.873535	63.076	SASTSSHR	4	S	yes
O14990	Protein phosphatase inhibitor 2 family member C (PPP1R2 family member B) (Protein phosphatase 1, regulatory subunit 2 pseudogene 9) (Type-1 protein phosphatase inhibitor 4) (I-4)	1.3038	3	0.844104	62.633	SASTSSHR	2	S	yes
O15015	Zinc finger protein 646	4.121	3	0.883625	54.776	EEVWEETTVK	1176	T	yes
O15018	PDZ domain-containing protein 2 (Activated in prostate cancer protein) (PDZ domain-containing protein 3) [Cleaved into: Processed PDZ domain-containing protein 2]	2.5115	3	0.997025	49.595	ADSGPVSPAASR	2041	S	yes
O15047	Histone-lysine N-methyltransferase SETD1A (EC 2.1.1.43) (Lysine N-methyltransferase 2F) (SET domain-containing protein 1A) (hSET1A) (Set1/Ash2 histone methyltransferase complex subunit SET1)	0.039551	4	0.329832	73.722	GSTPYSQDSAYSSSTTSTSFKPR	278	S	yes
O15047	Histone-lysine N-methyltransferase SETD1A (EC 2.1.1.43) (Lysine N-methyltransferase 2F) (SET domain-containing protein 1A) (hSET1A) (Set1/Ash2 histone methyltransferase complex subunit SET1)	0.039551	4	0.329832	73.722	GSTPYSQDSAYSSSTTSTSFKPR	282	S	yes
O15047	Histone-lysine N-methyltransferase SETD1A (EC 2.1.1.43) (Lysine N-methyltransferase 2F) (SET domain-containing protein 1A) (hSET1A) (Set1/Ash2 histone methyltransferase complex subunit SET1)	0.039551	4	0.329832	73.722	GSTPYSQDSAYSSSTTSTSFKPR	279	T	yes
O15090	Zinc finger protein 536	0.6274	3	1	137.9	PMNMLSVLR	1266	S	yes
O15111	Inhibitor of nuclear factor kappa-B kinase subunit alpha (I-kappa-B kinase alpha) (IKK-A) (IKK-alpha) (IkBKA) (IkappaB kinase) (EC 2.7.11.10) (Conserved helix-loop-helix ubiquitous kinase) (I-kappa-B kinase 1) (IKK1) (Nuclear factor NF-kappa-B inhibitor kinase alpha) (NFKBIKA) (Transcription factor 16) (TCF-16)	4.2413	3	0.766261	59.248	NTLISASQQLK	473	S	yes
O15119	T-box transcription factor TBX3 (T-box protein 3)	0.67319	3	0.496627	50.305	SSTLSSSSMSLSPK	696	S	yes
O15119	T-box transcription factor TBX3 (T-box protein 3)	0.67319	3	0.496627	50.305	SSTLSSSSMSLSPK	697	S	yes
O15297	Protein phosphatase 1D (EC 3.1.3.16) (Protein phosphatase 2C isoform delta) (PP2C-delta) (Protein phosphatase magnesium-dependent 1 delta) (p53-induced protein phosphatase 1)	1.113	3	0.87325	64.842	RTLEESNSGPLMKK	537	T	yes
O15315	DNA repair protein RAD51 homolog 2 (R51H2) (RAD51 homolog B) (Rad51B) (RAD51-like protein 1)	3.5849	3	1	77.185	QTAYGIKAQR	66	T	yes
O15457	MutS protein homolog 4 (hMSH4)	4.2043	2	1	44.425	NKEAILYTYK	830	T	yes
O15511	Actin-related protein 2/3 complex subunit 5 (Arp2/3 complex 16 kDa subunit) (p16-ARC)	1.269	3	0.891867	84.817	SKNTVSSAR	8	S	yes
O15511	Actin-related protein 2/3 complex subunit 5 (Arp2/3 complex 16 kDa subunit) (p16-ARC)	3.8094	3	0.986735	72.496	MSKNTVSSAR	5	S	yes
O15511	Actin-related protein 2/3 complex subunit 5 (Arp2/3 complex 16 kDa subunit) (p16-ARC)	0.85107	3	0.494717	67.997	MSKNTVSSAR	2	T	yes
O15511	Actin-related protein 2/3 complex subunit 5 (Arp2/3 complex 16 kDa subunit) (p16-ARC)	1.269	3	0.499988	62.799	SKNTVSSAR	7	S	yes
O43166	Signal-induced proliferation-associated 1-like protein 1 (SIPA1-like protein 1) (High-risk human papilloma viruses E6 oncoproteins targeted protein 1) (E6-targeted protein 1)	0.33992	3	1	100.38	QKSMPEGFGVSR	1178	S	yes
O43172	U4/U6 small nuclear ribonucleoprotein Prp4 (PRP4 homolog) (hPrp4) (U4/U6 snRNP 60 kDa protein) (WD splicing factor Prp4)	2.1779	4	0.996324	44.468	MASSRASSTQATKTK	14	T	yes
O43175	D-3-phosphoglycerate dehydrogenase (3-PGDH) (EC 1.1.1.95) (2-oxoglutarate reductase) (EC 1.1.1.399) (Malate dehydrogenase) (EC 1.1.1.37)	2.2007	3	0.5	78.692	KEVATRMQSFGMK	167	T	yes
O43175	D-3-phosphoglycerate dehydrogenase (3-PGDH) (EC 1.1.1.95) (2-oxoglutarate reductase) (EC 1.1.1.399) (Malate dehydrogenase) (EC 1.1.1.37)	2.2007	3	0.5	78.692	KEVATRMQSFGMK	163	S	yes
O43242	26S proteasome non-ATPase regulatory subunit 3 (26S proteasome regulatory subunit RPN3) (26S proteasome regulatory subunit S3) (Proteasome subunit p58)	2.9811	2	0.968165	56.632	MLPSTSR	105	S	yes
O43242	26S proteasome non-ATPase regulatory subunit 3 (26S proteasome regulatory subunit RPN3) (26S proteasome regulatory subunit S3) (Proteasome subunit p58)	2.1365	3	0.810651	46.406	MLPSTSR	104	T	yes
O43247	Testis-expressed protein 33	4.4238	3	0.998799	52.693	AAYSSLDTSKFK	34	S	yes
O43299	AP-5 complex subunit zeta-1 (Adaptor-related protein complex 5 zeta subunit) (Zeta5)	5.7287	3	0.999991	57.174	ATELLTLLK	756	T	yes
O43312	Metastasis suppressor protein 1 (Metastasis suppressor YGL-1) (Missing in metastasis protein)	0.63224	4	0.32638	42.629	SSTIPRNSDISQSYRR	545	S	yes
O43312	Metastasis suppressor protein 1 (Metastasis suppressor YGL-1) (Missing in metastasis protein)	0.63224	4	0.32638	42.629	SSTIPRNSDISQSYRR	546	S	yes
O43312	Metastasis suppressor protein 1 (Metastasis suppressor YGL-1) (Missing in metastasis protein)	0.63224	4	0.32638	42.629	SSTIPRNSDISQSYRR	547	T	yes
O43379	WD repeat-containing protein 62	0.22757	3	0.641212	94.122	RTRLSTASEETVQNR	49	S	yes
O43379	WD repeat-containing protein 62	0.22757	3	0.641212	94.122	RTRLSTASEETVQNR	46	T	yes
O43379	WD repeat-containing protein 62	0.22757	3	0.641212	94.122	RTRLSTASEETVQNR	50	T	yes
O43395	U4/U6 small nuclear ribonucleoprotein Prp3 (Pre-mRNA-splicing factor 3) (hPrp3) (U4/U6 snRNP 90 kDa protein)	0.45464	2	0.842121	55.676	TPSSSQPER	175	S	yes
O43395	U4/U6 small nuclear ribonucleoprotein Prp3 (Pre-mRNA-splicing factor 3) (hPrp3) (U4/U6 snRNP 90 kDa protein)	0.18693	3	0.856065	49.418	TPSSSQPER	176	S	yes
O43432	Eukaryotic translation initiation factor 4 gamma 3 (eIF-4-gamma 3) (eIF-4G 3) (eIF4G 3) (eIF-4-gamma II) (eIF4GII)	2.4388	3	1	89.231	AENAWKPSQKR	736	S	yes
O43491	Band 4.1-like protein 2 (Generally expressed protein 4.1) (4.1G)	0.55596	3	0.986213	71.548	KDSSQLGTDATK	23	T	yes
O43524	Forkhead box protein O3 (AF6q21 protein) (Forkhead in rhabdomyosarcoma-like 1)	4.3914	3	0.813823	44.614	QASSQSWVPG	666	S	yes
O60244	Mediator of RNA polymerase II transcription subunit 14 (Activator-recruited cofactor 150 kDa component) (ARC150) (Cofactor required for Sp1 transcriptional activation subunit 2) (CRSP complex subunit 2) (Mediator complex subunit 14) (RGR1 homolog) (hRGR1) (Thyroid hormone receptor-associated protein complex 170 kDa component) (Trap170) (Transcriptional coactivator CRSP150) (Vitamin D3 receptor-in…	1.5782	5	1	59.418	QATLHQLNQILR	191	T	yes
O60244	Mediator of RNA polymerase II transcription subunit 14 (Activator-recruited cofactor 150 kDa component) (ARC150) (Cofactor required for Sp1 transcriptional activation subunit 2) (CRSP complex subunit 2) (Mediator complex subunit 14) (RGR1 homolog) (hRGR1) (Thyroid hormone receptor-associated protein complex 170 kDa component) (Trap170) (Transcriptional coactivator CRSP150) (Vitamin D3 receptor-in…	2.9472	2	0.898307	50.04	TKTGKQTR	604	T	yes
O60259	Kallikrein-8 (hK8) (EC 3.4.21.118) (Neuropsin) (NP) (Ovasin) (Serine protease 19) (Serine protease TADG-14) (Tumor-associated differentially expressed gene 14 protein)	0.84564	2	0.961175	46.796	DQASLGSK	131	S	yes
O60293	Zinc finger C3H1 domain-containing protein (Coiled-coil domain-containing protein 131) (Proline/serine-rich coiled-coil protein 2)	3.5467	3	0.999968	57.106	KTAEQASKPK	745	T	yes
O60293	Zinc finger C3H1 domain-containing protein (Coiled-coil domain-containing protein 131) (Proline/serine-rich coiled-coil protein 2)	0.7697	2	0.999466	51.995	TAEQASK	749	S	yes
O60293	Zinc finger C3H1 domain-containing protein (Coiled-coil domain-containing protein 131) (Proline/serine-rich coiled-coil protein 2)	5.2048	3	0.999379	51.335	TAEQASKPK	744	T	yes
O60294	tRNA wybutosine-synthesizing protein 4 (tRNA yW-synthesizing protein 4) (EC 2.1.1.290) (EC 2.3.1.231) (Leucine carboxyl methyltransferase 2) (tRNA(Phe) (7-(3-amino-3-(methoxycarbonyl)propyl)wyosine(37)-N)-methoxycarbonyltransferase) (tRNA(Phe) (7-(3-amino-3-carboxypropyl)wyosine(37)-O)-methyltransferase)	0.11647	2	0.999979	80.014	VTITKAGRK	465	T	yes
O60299	Leucine zipper putative tumor suppressor 3 (ProSAP-interacting protein 1) (ProSAPiP1)	0.03219	5	1	47.189	QLQLSYVEMYQRNQQLER	622	S	yes
O60333	Kinesin-like protein KIF1B (Klp)	2.7301	3	1	78.342	GSELHWKDVR	1304	S	yes
O60346	PH domain leucine-rich repeat-containing protein phosphatase 1 (EC 3.1.3.16) (Pleckstrin homology domain-containing family E member 1) (PH domain-containing family E member 1) (Suprachiasmatic nucleus circadian oscillatory protein) (hSCOP)	0.69354	3	1	84.817	TLELLNNIR	1147	T	yes
O60346	PH domain leucine-rich repeat-containing protein phosphatase 1 (EC 3.1.3.16) (Pleckstrin homology domain-containing family E member 1) (PH domain-containing family E member 1) (Suprachiasmatic nucleus circadian oscillatory protein) (hSCOP)	2.0968	3	0.996508	44.564	LCMSGNCVETLR	797	T	yes
O60477	BMP/retinoic acid-inducible neural-specific protein 1 (Deleted in bladder cancer protein 1)	4.7654	2	1	124.92	SIRLLGR	104	S	yes
O60477	BMP/retinoic acid-inducible neural-specific protein 1 (Deleted in bladder cancer protein 1)	5.8451	4	0.936315	70.919	TRLPTLLR	627	T	yes
O60487	Myelin protein zero-like protein 2 (Epithelial V-like antigen 1)	3.8525	2	0.498981	42.869	YGKSSTR	6	S	yes
O60487	Myelin protein zero-like protein 2 (Epithelial V-like antigen 1)	3.8525	2	0.498981	42.869	YGKSSTR	5	S	yes
O60502	Protein O-GlcNAcase (OGA) (EC 3.2.1.169) (Beta-N-acetylglucosaminidase) (Beta-N-acetylhexosaminidase) (Beta-hexosaminidase) (Meningioma-expressed antigen 5) (N-acetyl-beta-D-glucosaminidase) (N-acetyl-beta-glucosaminidase) (Nuclear cytoplasmic O-GlcNAcase and acetyltransferase) (NCOAT)	5.6339	2	1	42.338	QVAHSGAK	405	S	yes
O60673	DNA polymerase zeta catalytic subunit (EC 2.7.7.7) (Protein reversionless 3-like) (REV3-like) (hREV3)	2.4406	3	0.920113	80.688	DKESSKGHTR	368	T	yes
O60673	DNA polymerase zeta catalytic subunit (EC 2.7.7.7) (Protein reversionless 3-like) (REV3-like) (hREV3)	4.773	3	0.985017	70.908	KGSNTDTLRR	2237	S	yes
O60760	Hematopoietic prostaglandin D synthase (H-PGDS) (EC 5.3.99.2) (GST class-sigma) (Glutathione S-transferase) (EC 2.5.1.18) (Glutathione-dependent PGD synthase) (Glutathione-requiring prostaglandin D synthase) (Prostaglandin-H2 D-isomerase)	0.67606	2	1	60.518	PNYKLTYFNMRGR	7	T	yes
O60828	Polyglutamine-binding protein 1 (PQBP-1) (38 kDa nuclear protein containing a WW domain) (Npw38) (Polyglutamine tract-binding protein 1)	2.0525	2	1	61.679	SHEKLDR	120	S	yes
O75027	ATP-binding cassette sub-family B member 7, mitochondrial (ATP-binding cassette transporter 7) (ABC transporter 7 protein)	0.36005	2	0.955113	43.419	VAIVGGSGSGK	509	S	yes
O75038	1-phosphatidylinositol 4,5-bisphosphate phosphodiesterase eta-2 (EC 3.1.4.11) (Phosphoinositide phospholipase C-eta-2) (Phosphoinositide phospholipase C-like 4) (PLC-L4) (Phospholipase C-like protein 4) (Phospholipase C-eta-2) (PLC-eta2)	2.2197	2	0.993237	63.694	RTASAPTK	934	T	yes
O75044	SLIT-ROBO Rho GTPase-activating protein 2 (srGAP2) (Formin-binding protein 2) (Rho GTPase-activating protein 34)	5.9994	3	0.473631	61.435	STVSETFMSK	424	S	yes
O75044	SLIT-ROBO Rho GTPase-activating protein 2 (srGAP2) (Formin-binding protein 2) (Rho GTPase-activating protein 34)	5.9994	3	0.473631	61.435	STVSETFMSK	425	T	yes
O75132	Zinc finger BED domain-containing protein 4	1.8854	3	0.450596	80.755	WSTSFHMLER	894	T	yes
O75132	Zinc finger BED domain-containing protein 4	1.1274	3	0.98732	62.546	TEVSETAR	617	S	yes
O75145	Liprin-alpha-3 (Protein tyrosine phosphatase receptor type f polypeptide-interacting protein alpha-3) (PTPRF-interacting protein alpha-3)	5.1333	3	0.922941	77.379	REESQTQIR	1033	T	yes
O75147	Obscurin-like protein 1	5.5342	3	1	105.2	VVLTCELSR	737	T	yes
O75165	DnaJ homolog subfamily C member 13 (Required for receptor-mediated endocytosis 8) (RME-8)	0.81573	2	1	74.165	ALKAMTR	2167	T	yes
O75179	Ankyrin repeat domain-containing protein 17 (Gene trap ankyrin repeat protein) (Serologically defined breast cancer antigen NY-BR-16)	0.13757	4	1	130.01	RQLFVTVVK	2001	T	yes
O75346	Zinc finger protein 253 (Bone marrow zinc finger 1) (BMZF-1) (Zinc finger protein 411)	0.69172	2	0.499856	64.73	SSTLTTHKK	189	T	yes
O75346	Zinc finger protein 253 (Bone marrow zinc finger 1) (BMZF-1) (Zinc finger protein 411)	0.69172	2	0.499856	64.73	SSTLTTHKK	188	T	yes
O75346	Zinc finger protein 253 (Bone marrow zinc finger 1) (BMZF-1) (Zinc finger protein 411)	2.0179	2	0.938451	57.559	SSTLTTHK	189;441	T	yes
O75362	Zinc finger protein 217	4.0278	2	0.485196	79.036	TSVSPAPDK	848	S	yes
O75369	Filamin-B (FLN-B) (ABP-278) (ABP-280 homolog) (Actin-binding-like protein) (Beta-filamin) (Filamin homolog 1) (Fh1) (Filamin-3) (Thyroid autoantigen) (Truncated actin-binding protein) (Truncated ABP)	2.0143	3	0.5	82.543	VTSKGAGLSK	2517	S	yes
O75369	Filamin-B (FLN-B) (ABP-278) (ABP-280 homolog) (Actin-binding-like protein) (Beta-filamin) (Filamin homolog 1) (Fh1) (Filamin-3) (Thyroid autoantigen) (Truncated actin-binding protein) (Truncated ABP)	2.0143	3	0.5	82.543	VTSKGAGLSK	2516	T	yes
O75376	Nuclear receptor corepressor 1 (N-CoR) (N-CoR1)	0.014467	2,3,4	1	115.7	SRYEEELR	1913	S	yes
O75376	Nuclear receptor corepressor 1 (N-CoR) (N-CoR1)	0.093519	2	0.499992	66.962	LISKSNSR	2330	S	yes
O75376	Nuclear receptor corepressor 1 (N-CoR) (N-CoR1)	0.093519	2	0.500001	66.962	LISKSNSR	2332	S	yes
O75376	Nuclear receptor corepressor 1 (N-CoR) (N-CoR1)	0.52029	3	0.78549	55.176	TPVSYQNTMSR	1487	S	yes
O75376	Nuclear receptor corepressor 1 (N-CoR) (N-CoR1)	5.0395	3	0.877279	53.001	PSVGSISLGLPR	1082	S	yes
O75376	Nuclear receptor corepressor 1 (N-CoR) (N-CoR1)	0.25073	4	0.486911	52.966	SSHLEVSQASQLLQQQQQQQLR	45	S	yes
O75376	Nuclear receptor corepressor 1 (N-CoR) (N-CoR1)	0.25073	4	0.486911	52.966	SSHLEVSQASQLLQQQQQQQLR	46	S	yes
O75394	39S ribosomal protein L33, mitochondrial (L33mt) (MRP-L33) (Mitochondrial large ribosomal subunit protein bL33m)	3.1379	4	1	40.725	FLSAVFFAK	4	S	yes
O75417	DNA polymerase theta (EC 2.7.7.7) (DNA polymerase eta)	4.0479	3	0.90343	98.942	SMTINFSSLNR	1660	S	yes
O75417	DNA polymerase theta (EC 2.7.7.7) (DNA polymerase eta)	3.7837	4	0.999997	58.32	KTEFRNSGPFAK	1089	T	yes
O75592	E3 ubiquitin-protein ligase MYCBP2 (EC 2.3.2.-) (Myc-binding protein 2) (Protein associated with Myc)	0.41206	3	1	59.245	PSENMLIR	2360	S	yes
O75592	E3 ubiquitin-protein ligase MYCBP2 (EC 2.3.2.-) (Myc-binding protein 2) (Protein associated with Myc)	0.32296	4	0.990878	49.149	RRVNSGDTEVGSSLLR	3467	S	yes
O75643	U5 small nuclear ribonucleoprotein 200 kDa helicase (EC 3.6.4.13) (Activating signal cointegrator 1 complex subunit 3-like 1) (BRR2 homolog) (U5 snRNP-specific 200 kDa protein) (U5-200KD)	4.1583	2	1	52.725	MADVTAR	5	T	yes
O75746	Calcium-binding mitochondrial carrier protein Aralar1 (Mitochondrial aspartate glutamate carrier 1) (Solute carrier family 25 member 12)	2.8616	3	0.995636	40.844	KDVEVTKEEFAQSAIR	256	S	yes
O75920	Small EDRK-rich factor 1 (Protein 4F5) (h4F5) (SMA modifier 1)	3.1887	4	1	83	KTQEISKGK	18	T	yes
O75920	Small EDRK-rich factor 1 (Protein 4F5) (h4F5) (SMA modifier 1)	2.0159	3	0.986217	71.548	KQSSGGQKSESK	47	S	yes
O75920	Small EDRK-rich factor 1 (Protein 4F5) (h4F5) (SMA modifier 1)	1.0564	3	0.522146	51.979	KQSSGGQKSESK	39	S	yes
O75943	Cell cycle checkpoint protein RAD17 (hRad17) (RF-C/activator 1 homolog)	2.1857	4	0.5	71.153	MSKTFLRPK	2	S	yes
O75943	Cell cycle checkpoint protein RAD17 (hRad17) (RF-C/activator 1 homolog)	2.1857	4	0.5	71.153	MSKTFLRPK	4	T	yes
O76027	Annexin A9 (Annexin XXXI) (Annexin-31) (Annexin-9) (Pemphaxin)	2.958	3	0.999882	52.693	SLQAALSGNLER	100	S	yes
O76031	ATP-dependent Clp protease ATP-binding subunit clpX-like, mitochondrial	3.8074	2	1	41.399	EPESAAEAVK	152	S	yes
O76038	Secretagogin	0.50023	3	0.499999	75.213	DSSREPTLGR	4	S	yes
O76038	Secretagogin	0.50023	3	0.499999	75.213	DSSREPTLGR	3	S	yes
O76039	Cyclin-dependent kinase-like 5 (EC 2.7.11.22) (Serine/threonine-protein kinase 9)	0.38222	2	0.998829	88.681	SPSYRTKAK	479	S	yes
O76039	Cyclin-dependent kinase-like 5 (EC 2.7.11.22) (Serine/threonine-protein kinase 9)	5.8657	2	0.993362	76.17	TLLSPSGR	543	S	yes
O76041	Nebulette (Actin-binding Z-disk protein)	5.3663	2	0.999963	75.589	GTAISDPPELK	699	S	yes
O76041	Nebulette (Actin-binding Z-disk protein)	0.25835	4	1	48.283	KDSPEIER	608	S	yes
O94761	ATP-dependent DNA helicase Q4 (EC 3.6.4.12) (DNA helicase, RecQ-like type 4) (RecQ4) (RTS) (RecQ protein-like 4)	1.8064	2	0.999811	60.255	AATKSPQPTPGR	93	T	yes
O94762	ATP-dependent DNA helicase Q5 (EC 3.6.4.12) (DNA helicase, RecQ-like type 5) (RecQ5) (RecQ protein-like 5)	1.3574	4	0.865999	49.482	TCIGPSQGNGFDPELYEGGRK	456	T	yes
O94763	Unconventional prefoldin RPB5 interactor 1 (Protein NNX3) (Protein phosphatase 1 regulatory subunit 19) (RNA polymerase II subunit 5-mediating protein) (RPB5-mediating protein)	1.2025	3	1	108.23	VRINTGKNTTLK	355	T	yes
O94763	Unconventional prefoldin RPB5 interactor 1 (Protein NNX3) (Protein phosphatase 1 regulatory subunit 19) (RNA polymerase II subunit 5-mediating protein) (RPB5-mediating protein)	1.2025	3	1	108.23	VRINTGKNTTLK	354	T	yes
O94842	TOX high mobility group box family member 4 (Epidermal Langerhans cell protein LCP1)	2.944	3	0.300875	49.528	GLQLGQTSTATIQPSQQAQIVTR	407	T	yes
O94842	TOX high mobility group box family member 4 (Epidermal Langerhans cell protein LCP1)	2.944	3	0.300875	49.528	GLQLGQTSTATIQPSQQAQIVTR	406	S	yes
O94842	TOX high mobility group box family member 4 (Epidermal Langerhans cell protein LCP1)	2.944	3	0.300875	49.528	GLQLGQTSTATIQPSQQAQIVTR	405	T	yes
O94851	[F-actin]-monooxygenase MICAL2 (EC 1.14.13.225) (Molecule interacting with CasL protein 2) (MICAL-2)	0.81229	3	1	70.68	VKSMANQLLAK	717	S	yes
O94906	Pre-mRNA-processing factor 6 (Androgen receptor N-terminal domain-transactivating protein 1) (ANT-1) (PRP6 homolog) (U5 snRNP-associated 102 kDa protein) (U5-102 kDa protein)	3.0847	4	0.456191	57.267	SSAPTARVFMK	671	S	yes
O94906	Pre-mRNA-processing factor 6 (Androgen receptor N-terminal domain-transactivating protein 1) (ANT-1) (PRP6 homolog) (U5 snRNP-associated 102 kDa protein) (U5-102 kDa protein)	3.0847	4	0.456191	57.267	SSAPTARVFMK	670	S	yes
O94986	Centrosomal protein of 152 kDa (Cep152)	1.5965	3	1	116.55	REWTMQEAK	1028	T	yes
O94993	Transcription factor SOX-30	3.8233	2	0.998478	40.725	VPLTPVPTK	292	T	yes
O95071	E3 ubiquitin-protein ligase UBR5 (EC 2.3.2.26) (E3 ubiquitin-protein ligase, HECT domain-containing 1) (HECT-type E3 ubiquitin transferase UBR5) (Hyperplastic discs protein homolog) (hHYD) (Progestin-induced protein)	0.25039	3	0.999893	110.64	LNSNSGAGRTSR	94	S	yes
O95147	Dual specificity protein phosphatase 14 (EC 3.1.3.16) (EC 3.1.3.48) (MKP-1-like protein tyrosine phosphatase) (MKP-L) (Mitogen-activated protein kinase phosphatase 6) (MAP kinase phosphatase 6) (MKP-6)	0.57578	3,4	0.973456	59.227	SSRGHSTLPR	2	S	yes
O95169	NADH dehydrogenase [ubiquinone] 1 beta subcomplex subunit 8, mitochondrial (Complex I-ASHI) (CI-ASHI) (NADH-ubiquinone oxidoreductase ASHI subunit)	2.1031	4	0.868636	42.396	TASHMTK	28	T	yes
O95251	Histone acetyltransferase KAT7 (EC 2.3.1.48) (Histone acetyltransferase binding to ORC1) (Lysine acetyltransferase 7) (MOZ, YBF2/SAS3, SAS2 and TIP60 protein 2) (MYST-2)	4.5413	3	0.5	52.254	EKYMEHRQTYGNTR	289	T	yes
O95251	Histone acetyltransferase KAT7 (EC 2.3.1.48) (Histone acetyltransferase binding to ORC1) (Lysine acetyltransferase 7) (MOZ, YBF2/SAS3, SAS2 and TIP60 protein 2) (MYST-2)	4.5413	3	0.5	52.254	EKYMEHRQTYGNTR	293	T	yes
O95373	Histone acetyltransferase KAT7 (EC 2.3.1.48) (Histone acetyltransferase binding to ORC1) (Lysine acetyltransferase 7) (MOZ, YBF2/SAS3, SAS2 and TIP60 protein 2) (MYST-2)	1.6529	3	1	41.56	DPNTIIEALR	5	T	yes
O95391	Pre-mRNA-splicing factor SLU7 (hSlu7)	4.9039	3	0.999857	77.124	RGVKENSIITK	110	S	yes
O95425	Supervillin (Archvillin) (p205/p250)	3.2401	3	1	93.667	KAKLSVAAK	694	S	yes
O95425	Supervillin (Archvillin) (p205/p250)	1.3493	2	1	62.799	AKLSVAAKR	693	S	yes
O95425	Supervillin (Archvillin) (p205/p250)	1.862	3	0.900698	50.292	ITGSARIRWASDR	2071	S	yes
O95447	Lebercilin-like protein (Leber congenital amaurosis 5-like protein)	3.1326	3	0.99985	56.359	SDVPPLTTK	380	S	yes
O95466	Formin-like protein 1 (CLL-associated antigen KW-13) (Leukocyte formin)	4.6945	3	0.994941	65.295	TVPFTARTGK	1078	T	yes
O95613	Pericentrin (Kendrin) (Pericentrin-B)	0.73193	3	0.5	63.727	TSRVEDLEQLKQR	496	S	yes
O95613	Pericentrin (Kendrin) (Pericentrin-B)	0.73193	3	0.5	63.727	TSRVEDLEQLKQR	495	T	yes
O95613	Pericentrin (Kendrin) (Pericentrin-B)	0.7483	3	0.938434	47.088	RKGSAVDASVQEESPVTK	57	T	yes
O95628	CCR4-NOT transcription complex subunit 4 (EC 2.3.2.27) (CCR4-associated factor 4) (E3 ubiquitin-protein ligase CNOT4) (Potential transcriptional repressor NOT4Hp) (RING-type E3 ubiquitin transferase CNOT4)	0.18985	3	0.990979	50.226	KSNPVIPISSSNHSAR	321	S	yes
O95677	Eyes absent homolog 4 (EC 3.1.3.48)	0.54446	2	0.499971	117.86	TCRSSGSKSR	346	S	yes
O95677	Eyes absent homolog 4 (EC 3.1.3.48)	0.54446	2	0.499971	117.86	TCRSSGSKSR	343	T	yes
O95696	Bromodomain-containing protein 1 (BR140-like protein) (Bromodomain and PHD finger-containing protein 2)	3.2789	3	0.550545	47.712	TVRSTSKVR	423	T	yes
O95696	Bromodomain-containing protein 1 (BR140-like protein) (Bromodomain and PHD finger-containing protein 2)	4.5724	2	0.806752	43.442	TVRSTSK	422	S	yes
O95714	E3 ubiquitin-protein ligase HERC2 (EC 2.3.2.26) (HECT domain and RCC1-like domain-containing protein 2) (HECT-type E3 ubiquitin transferase HERC2)	0.54991	3	0.999878	50.178	KETAPVQLPVSGPELAAMMK	1851	T	yes
O95714	E3 ubiquitin-protein ligase HERC2 (EC 2.3.2.26) (HECT domain and RCC1-like domain-containing protein 2) (HECT-type E3 ubiquitin transferase HERC2)	3.5658	3	1	42.068	LGRGGSDGCKVPMK	4182	S	yes
O95789	Zinc finger MYM-type protein 6 (Transposon-derived Buster2 transposase-like protein) (Zinc finger protein 258)	4.4289	3	0.5	60.255	TSYPELHERAMK	1262	T	yes
O95789	Zinc finger MYM-type protein 6 (Transposon-derived Buster2 transposase-like protein) (Zinc finger protein 258)	4.4289	3	0.5	60.255	TSYPELHERAMK	1263	S	yes
O95822	Malonyl-CoA decarboxylase, mitochondrial (MCD) (EC 4.1.1.9)	0.85826	3	1	71.555	RGFGPGLTAR	9	T	yes
O96028	Histone-lysine N-methyltransferase NSD2 (EC 2.1.1.43) (Multiple myeloma SET domain-containing protein) (MMSET) (Nuclear SET domain-containing protein 2) (Protein trithorax-5) (Wolf-Hirschhorn syndrome candidate 1 protein)	3.9362	3	1	114.97	SERGVTAKK	658	S	yes
O96028	Histone-lysine N-methyltransferase NSD2 (EC 2.1.1.43) (Multiple myeloma SET domain-containing protein) (MMSET) (Nuclear SET domain-containing protein 2) (Protein trithorax-5) (Wolf-Hirschhorn syndrome candidate 1 protein)	1.2149	4	0.397972	45.915	TSTTLSSEEKGK	1209	S	yes
O96028	Histone-lysine N-methyltransferase NSD2 (EC 2.1.1.43) (Multiple myeloma SET domain-containing protein) (MMSET) (Nuclear SET domain-containing protein 2) (Protein trithorax-5) (Wolf-Hirschhorn syndrome candidate 1 protein)	1.2149	4	0.397972	45.915	TSTTLSSEEKGK	1210	T	yes
P02545	Prelamin-A/C [Cleaved into: Lamin-A/C (70 kDa lamin) (Renal carcinoma antigen NY-REN-32)]	0.0050509	4	0.3246	56.25	ASASGSGAQVGGPISSGSSASSVTVTR	599	S	yes
P02545	Prelamin-A/C [Cleaved into: Lamin-A/C (70 kDa lamin) (Renal carcinoma antigen NY-REN-32)]	0.0050509	4	0.3246	56.25	ASASGSGAQVGGPISSGSSASSVTVTR	603	S	yes
P02545	Prelamin-A/C [Cleaved into: Lamin-A/C (70 kDa lamin) (Renal carcinoma antigen NY-REN-32)]	0.0050509	4	0.3246	56.25	ASASGSGAQVGGPISSGSSASSVTVTR	601	S	yes
P04150	Glucocorticoid receptor (GR) (Nuclear receptor subfamily 3 group C member 1)	0.19998	3	0.999463	111.72	VSASSPSLAVASQSDSK	42	S	yes
P04198	N-myc proto-oncogene protein (Class E basic helix-loop-helix protein 37) (bHLHe37)	3.5361	3	0.998888	76.588	IKSEASPRPLK	352	S	yes
P05166	Propionyl-CoA carboxylase beta chain, mitochondrial (PCCase subunit beta) (EC 6.4.1.3) (Propanoyl-CoA:carbon dioxide ligase subunit beta)	5.3271	3	1	76.332	RTALLGGGQR	45	T	yes
P05783	Keratin, type I cytoskeletal 18 (Cell proliferation-inducing gene 46 protein) (Cytokeratin-18) (CK-18) (Keratin-18) (K18)	0.0090289	3	0.996277	192.5	PVSSAASVYAGAGGSGSR	30	S	yes
P05783	Keratin, type I cytoskeletal 18 (Cell proliferation-inducing gene 46 protein) (Cytokeratin-18) (CK-18) (Keratin-18) (K18)	0.0090289	3	0.499132	113.37	PVSSAASVYAGAGGSGSR	31	S	yes
P07196	Neurofilament light polypeptide (NF-L) (68 kDa neurofilament protein) (Neurofilament triplet L protein)	2.6762	3	0.964097	45.653	TTKSEMAR	360	T	yes
P07315	Gamma-crystallin C (Gamma-C-crystallin) (Gamma-crystallin 2-1) (Gamma-crystallin 3)	0.76903	4	1	40.756	KCQDWGAMDAKAGSLR	167	S	yes
P08133	Annexin A6 (67 kDa calelectrin) (Annexin VI) (Annexin-6) (Calphobindin-II) (CPB-II) (Chromobindin-20) (Lipocortin VI) (Protein III) (p68) (p70)	5.5676	5	0.5	46.481	IMVSRSEIDLLNIR	628	S	yes
P08133	Annexin A6 (67 kDa calelectrin) (Annexin VI) (Annexin-6) (Calphobindin-II) (CPB-II) (Chromobindin-20) (Lipocortin VI) (Protein III) (p68) (p70)	5.5676	5	0.5	46.481	IMVSRSEIDLLNIR	630	S	yes
P08670	Vimentin	4.1059	2	0.497894	44.543	SYVTTSTR	32	S	yes
P08670	Vimentin	4.1059	2	0.497894	44.543	SYVTTSTR	29	T	yes
P08758	Annexin A5 (Anchorin CII) (Annexin V) (Annexin-5) (Calphobindin I) (CBP-I) (Endonexin II) (Lipocortin V) (Placental anticoagulant protein 4) (PP4) (Placental anticoagulant protein I) (PAP-I) (Thromboplastin inhibitor) (Vascular anticoagulant-alpha) (VAC-alpha)	1.5708	3	1	62.298	LIVALMKPSR	88	S	yes
P0C671	Uncharacterized protein C6orf222	2.2083	3	0.498847	50.158	KSQVAHSSKLDR	591	S	yes
P0C671	Uncharacterized protein C6orf222	2.2083	3	0.498847	50.158	KSQVAHSSKLDR	590	S	yes
P0C6C1	Ankyrin repeat domain-containing protein 34C	0.10762	3	0.999386	88.155	GSGTLLLDR	447	S	yes
P0C7M7	Acyl-coenzyme A synthetase ACSM4, mitochondrial (EC 6.2.1.2) (Acyl-CoA synthetase medium-chain family member 4)	0.45373	3	0.999956	57.009	GDEVKWSFRELGSLSR	90	S	yes
P0C881	Radial spoke head 10 homolog B	2.4957	2	0.906156	80.688	TITSKKK	864	T	yes
P0CF97	Protein FAM200B	1.3003	3	0.889816	47.039	LKTIPNDNTVSLR	199	T	yes
P0CG13	Chromosome transmission fidelity protein 8 homolog (hCTF8)	1.9659	3	0.503115	68.44	ETGTRYLVTALIK	97	T	yes
P0CG13	Chromosome transmission fidelity protein 8 homolog (hCTF8)	1.9659	3	0.503115	68.44	ETGTRYLVTALIK	92	T	yes
P0CG13	Chromosome transmission fidelity protein 8 homolog (hCTF8)	1.9659	3	0.99377	68.44	ETGTRYLVTALIK	90	T	yes
P0CZ20	Deleted.	1.1558	3	1	56.043	VRLRQMLTR	291	T	yes
P0DMR3	Putative protein ATXN8OS (ATXN8 opposite strand) (Spinocerebellar ataxia 8) (kelch-like 1 antisense)	1.1494	3	0.968378	81.703	VLTPLLSWLLSR	48	T	yes
P10644	cAMP-dependent protein kinase type I-alpha regulatory subunit (Tissue-specific extinguisher 1) (TSE1)	3.3114	2	1	49.715	TMAALAK	124	T	yes
P11277	Spectrin beta chain, erythrocytic (Beta-I spectrin)	0.61926	3	1	54.539	QIETQER	1928	T	yes
P11388	DNA topoisomerase 2-alpha (EC 5.99.1.3) (DNA topoisomerase II, alpha isozyme)	0.2873	3	0.869594	127.51	IVSKAVTSK	1488	S	yes
P11388	DNA topoisomerase 2-alpha (EC 5.99.1.3) (DNA topoisomerase II, alpha isozyme)	1.3041	3	0.499999	82.305	IVSKAVTSK	1487	T	yes
P11388	DNA topoisomerase 2-alpha (EC 5.99.1.3) (DNA topoisomerase II, alpha isozyme)	2.5123	2	0.975369	77.42	SVVSDLEADDVK	1374	S	yes
P11532	Dystrophin	0.69268	3	1	116.37	KLQDVSMK	1455	S	yes
P11532	Dystrophin	2.4297	4	0.887471	57.52	RSAVEGMPSNLDSEVAWGK	1598	S	yes
P12036	Neurofilament heavy polypeptide (NF-H) (200 kDa neurofilament protein) (Neurofilament triplet H protein)	3.5431	3	0.999999	94.363	SPEKAKSPEK	648	S	yes
P12036	Neurofilament heavy polypeptide (NF-H) (200 kDa neurofilament protein) (Neurofilament triplet H protein)	0.50807	3	0.5	87.001	TTELEALKSTK	329	T	yes
P12036	Neurofilament heavy polypeptide (NF-H) (200 kDa neurofilament protein) (Neurofilament triplet H protein)	0.50807	3	0.5	87.001	TTELEALKSTK	330	T	yes
P12036	Neurofilament heavy polypeptide (NF-H) (200 kDa neurofilament protein) (Neurofilament triplet H protein)	4.6081	2	0.5	80.522	SPEKAKSPLK	801	S	yes
P12036	Neurofilament heavy polypeptide (NF-H) (200 kDa neurofilament protein) (Neurofilament triplet H protein)	4.6081	2	0.5	80.522	SPEKAKSPLK	807	S	yes
P12036	Neurofilament heavy polypeptide (NF-H) (200 kDa neurofilament protein) (Neurofilament triplet H protein)	4.403	4	0.965094	76.24	TSVSSVSASPSR	54	S	yes
P12036	Neurofilament heavy polypeptide (NF-H) (200 kDa neurofilament protein) (Neurofilament triplet H protein)	4.1603	3	1	72.496	AKSPEKEEAK	532	S	yes
P12036	Neurofilament heavy polypeptide (NF-H) (200 kDa neurofilament protein) (Neurofilament triplet H protein)	0.93704	3	0.97554	66.56	SPEKAKSPTK	642	T	yes
P12270	Nucleoprotein TPR (Megator) (NPC-associated intranuclear protein) (Translocated promoter region protein)	5.5798	3	0.997229	74.987	TETMNVVMETNKMLR	1266	T	yes
P12270	Nucleoprotein TPR (Megator) (NPC-associated intranuclear protein) (Translocated promoter region protein)	0.67126	4	0.570418	42.557	GIASTSDPPTANIKPTPVVSTPSK	1676	S	yes
P13056	Nuclear receptor subfamily 2 group C member 1 (Orphan nuclear receptor TR2) (Testicular receptor 2)	1.4347	2	1	93.561	IDSVIPHILK	581	S	yes
P13056	Nuclear receptor subfamily 2 group C member 1 (Orphan nuclear receptor TR2) (Testicular receptor 2)	0.29251	4	1	80.916	KNLVYSCR	148	S	yes
P13378	Homeobox protein Hox-D8 (Homeobox protein Hox-4E) (Homeobox protein Hox-5.4)	0.011632	3	0.916355	40.154	SSYFVNPLYSK	2	S	yes
P14653	Homeobox protein Hox-B1 (Homeobox protein Hox-2I)	2.4553	3	0.499641	55.452	TAKVSEPGLGSPSGLR	204	S	yes
P14653	Homeobox protein Hox-B1 (Homeobox protein Hox-2I)	2.4553	3	0.499641	55.452	TAKVSEPGLGSPSGLR	202	S	yes
P15170	Eukaryotic peptide chain release factor GTP-binding subunit ERF3A (Eukaryotic peptide chain release factor subunit 3a) (eRF3a) (G1 to S phase transition protein 1 homolog)	1.8671	3	0.978984	61.815	SGEKSKTR	436	S	yes
P15311	Ezrin (Cytovillin) (Villin-2) (p81)	3.9631	4	1	83.883	LQDYEEKTK	358	T	yes
P15735	Phosphorylase b kinase gamma catalytic chain, liver/testis isoform (PHK-gamma-LT) (PHK-gamma-T) (EC 2.7.11.19) (PSK-C3) (Phosphorylase kinase subunit gamma-2)	0.46028	4	1	55.04	ATGHEFAVK	46	T	yes
P15924	Desmoplakin (DP) (250/210 kDa paraneoplastic pemphigus antigen)	0.2674	2	1	121.5	AQIDNLTR	1399	T	yes
P15924	Desmoplakin (DP) (250/210 kDa paraneoplastic pemphigus antigen)	0.82979	3	1	89.679	EDDSKNLR	1232	S	yes
P15924	Desmoplakin (DP) (250/210 kDa paraneoplastic pemphigus antigen)	4.3839	3	0.999486	55.899	SMVEDITGLR	2792	S	yes
P16435	NADPH--cytochrome P450 reductase (CPR) (P450R) (EC 1.6.2.4)	5.6984	2	0.5	90.149	KESSFVEK	69	S	yes
P16435	NADPH--cytochrome P450 reductase (CPR) (P450R) (EC 1.6.2.4)	5.6984	2	0.5	90.149	KESSFVEK	68	S	yes
P16435	NADPH--cytochrome P450 reductase (CPR) (P450R) (EC 1.6.2.4)	4.0156	2	0.520493	41.08	ESSFVEK	67	S	yes
P17019	Zinc finger protein 708 (Zinc finger protein 15) (Zinc finger protein 15-like 1) (Zinc finger protein KOX8)	5.0413	3	0.99973	63.076	CVTTTQSK	69	T	yes
P17019	Zinc finger protein 708 (Zinc finger protein 15) (Zinc finger protein 15-like 1) (Zinc finger protein KOX8)	1.9921	3	0.970366	42.843	AFSIFSILTKHK	366	S	yes
P17040	Zinc finger and SCAN domain-containing protein 20 (Zinc finger protein 31) (Zinc finger protein 360) (Zinc finger protein KOX29)	5.7666	2	1	69.864	KAAVRAMGTVR	581	T	yes
P17252	Protein kinase C alpha type (PKC-A) (PKC-alpha) (EC 2.7.11.13)	0.017451	3	1	72.34	LHVTVRDAK	176	T	yes
P17844	Probable ATP-dependent RNA helicase DDX5 (EC 3.6.4.13) (DEAD box protein 5) (RNA helicase p68)	3.5625	3	0.999999	89.369	SKEITVR	79	S	yes
P18054	Arachidonate 12-lipoxygenase, 12S-type (12S-LOX) (12S-lipoxygenase) (EC 1.13.11.31) (Lipoxin synthase 12-LO) (EC 3.3.2.-) (Platelet-type lipoxygenase 12)	2.0316	5	1	43.382	EITARNEQLDWPYEYLK	639	T	yes
P18583	Protein SON (Bax antagonist selected in saccharomyces 1) (BASS1) (Negative regulatory element-binding protein) (NRE-binding protein) (Protein DBP-5) (SON3)	3.8607	2	0.999991	105.12	SQVTLTK	2172	T	yes
P18583	Protein SON (Bax antagonist selected in saccharomyces 1) (BASS1) (Negative regulatory element-binding protein) (NRE-binding protein) (Protein DBP-5) (SON3)	1.6963	2	0.998075	85.862	RTSESRSR	1841	S	yes
P18583	Protein SON (Bax antagonist selected in saccharomyces 1) (BASS1) (Negative regulatory element-binding protein) (NRE-binding protein) (Protein DBP-5) (SON3)	0.16545	3	0.59768	74.165	DSSLRSR	1824	S	yes
P18583	Protein SON (Bax antagonist selected in saccharomyces 1) (BASS1) (Negative regulatory element-binding protein) (NRE-binding protein) (Protein DBP-5) (SON3)	2.7384	3	0.913115	51.927	DSSLRSR	1821	S	yes
P18846	Cyclic AMP-dependent transcription factor ATF-1 (cAMP-dependent transcription factor ATF-1) (Activating transcription factor 1) (Protein TREB36)	0.11687	4	0.199903	64.761	TTPSATSLPQTVVMTSPVTLTSQTTK	183	T	yes
P18846	Cyclic AMP-dependent transcription factor ATF-1 (cAMP-dependent transcription factor ATF-1) (Activating transcription factor 1) (Protein TREB36)	0.11687	4	0.199903	64.761	TTPSATSLPQTVVMTSPVTLTSQTTK	184	T	yes
P18846	Cyclic AMP-dependent transcription factor ATF-1 (cAMP-dependent transcription factor ATF-1) (Activating transcription factor 1) (Protein TREB36)	0.080945	4	0.341636	64.761	TTPSATSLPQTVVMTSPVTLTSQTTK	188	T	yes
P18846	Cyclic AMP-dependent transcription factor ATF-1 (cAMP-dependent transcription factor ATF-1) (Activating transcription factor 1) (Protein TREB36)	0.080945	4	0.341636	64.761	TTPSATSLPQTVVMTSPVTLTSQTTK	189	S	yes
P18846	Cyclic AMP-dependent transcription factor ATF-1 (cAMP-dependent transcription factor ATF-1) (Activating transcription factor 1) (Protein TREB36)	0.11687	4	0.199903	64.761	TTPSATSLPQTVVMTSPVTLTSQTTK	186	S	yes
P19367	Hexokinase-1 (EC 2.7.1.1) (Brain form hexokinase) (Hexokinase type I) (HK I)	1.0924	2	0.999985	48.283	TVCGVVSR	821	T	yes
P19429	Troponin I, cardiac muscle (Cardiac troponin I)	0.78577	3	1	96.103	AYATEPHAKKK	31	T	yes
P19622	Homeobox protein engrailed-2 (Homeobox protein en-2) (Hu-En-2)	3.8261	3	1	75.574	GGDPGGPLDGSLK	180	S	yes
P19634	Sodium/hydrogen exchanger 1 (APNH) (Na(+)/H(+) antiporter, amiloride-sensitive) (Na(+)/H(+) exchanger 1) (NHE-1) (Solute carrier family 9 member 1)	1.2838	3	0.97567	49.31	LDSPTMSRAR	697	S	yes
P20337	Ras-related protein Rab-3B	2.0337	3	0.999582	41.399	ASVTDGK	3	S	yes
P20337	Ras-related protein Rab-3B	1.2252	2	0.985516	41.109	MASVTDGK	3	S	yes
P20929	Nebulin	1.351	3	0.885162	48.467	EVTKHVSDTNYK	5685	S	yes
P21397	Amine oxidase [flavin-containing] A (EC 1.4.3.4) (Monoamine oxidase type A) (MAO-A)	1.6631	3,4	1	67.214	VLGSQEALHPVHYEEK	383	S	yes
P22681	E3 ubiquitin-protein ligase CBL (EC 2.3.2.27) (Casitas B-lineage lymphoma proto-oncogene) (Proto-oncogene c-Cbl) (RING finger protein 55) (RING-type E3 ubiquitin transferase CBL) (Signal transduction protein CBL)	0.34948	3	0.929593	46.282	VPVSAPSSSDPWTGR	601	S	yes
P22694	cAMP-dependent protein kinase catalytic subunit beta (PKA C-beta) (EC 2.7.11.11)	0.57948	3	1	93.598	IVSGKVR	253	S	yes
P23921	Ribonucleoside-diphosphate reductase large subunit (EC 1.17.4.1) (Ribonucleoside-diphosphate reductase subunit M1) (Ribonucleotide reductase large subunit)	5.696	2	0.999076	50.158	NTAAMVCSLENR	780	S	yes
P25786	Proteasome subunit alpha type-1 (EC 3.4.25.1) (30 kDa prosomal protein) (PROS-30) (Macropain subunit C2) (Multicatalytic endopeptidase complex subunit C2) (Proteasome component C2) (Proteasome nu chain)	5.8724	3	0.965612	47.062	KETLPAEQDLTTK	207	T	yes
P26374	Rab proteins geranylgeranyltransferase component A 2 (Choroideremia-like protein) (Rab escort protein 2) (REP-2)	4.5074	3	0.977531	40.516	TCMHTVSDK	192	S	yes
P26599	Polypyrimidine tract-binding protein 1 (PTB) (57 kDa RNA-binding protein PPTB-1) (Heterogeneous nuclear ribonucleoprotein I) (hnRNP I)	0.42966	3	0.999998	85.909	SAGVPSRVIHIR	53	S	yes
P26640	Valine--tRNA ligase (EC 6.1.1.9) (Protein G7a) (Valyl-tRNA synthetase) (ValRS)	4.2005	4	0.606856	41.912	DPGVITYDLPTPPGEKKDVSGPMPDSYSPR	279	T	yes
P27348	14-3-3 protein theta (14-3-3 protein T-cell) (14-3-3 protein tau) (Protein HS1)	1.6728	3	0.999992	66.12	QTIDNSQGAYQEAFDISK	156	S	yes
P27694	Replication protein A 70 kDa DNA-binding subunit (RP-A p70) (Replication factor A protein 1) (RF-A protein 1) (Single-stranded DNA-binding protein) [Cleaved into: Replication protein A 70 kDa DNA-binding subunit, N-terminally processed]	0.62625	2	1	101.39	IKATVMDVK	590	T	yes
P27816	Microtubule-associated protein 4 (MAP-4)	1.2109	2,3	1	84.687	DVTLLKETER	349	T	yes
P27816	Microtubule-associated protein 4 (MAP-4)	0.30063	4	0.999994	67.234	ASPSKPASAPASR	797	S	yes
P29323	Ephrin type-B receptor 2 (EC 2.7.10.1) (Developmentally-regulated Eph-related tyrosine kinase) (ELK-related tyrosine kinase) (EPH tyrosine kinase 3) (EPH-like kinase 5) (EK5) (hEK5) (Renal carcinoma antigen NY-REN-47) (Tyrosine-protein kinase TYRO5) (Tyrosine-protein kinase receptor EPH-3)	1.9683	3	0.997539	44.683	ELSEYNATAIKSPTNTVTVQGLK	494	T	yes
P29350	Tyrosine-protein phosphatase non-receptor type 6 (EC 3.1.3.48) (Hematopoietic cell protein-tyrosine phosphatase) (Protein-tyrosine phosphatase 1C) (PTP-1C) (Protein-tyrosine phosphatase SHP-1) (SH-PTP1)	2.1315	3	0.987238	94.262	VIVMTTR	350	T	yes
P30260	Cell division cycle protein 27 homolog (Anaphase-promoting complex subunit 3) (APC3) (CDC27 homolog) (CDC27Hs) (H-NUC)	2.6072	3	1	58.071	KSEKALDTLNK	691	T	yes
P30260	Cell division cycle protein 27 homolog (Anaphase-promoting complex subunit 3) (APC3) (CDC27 homolog) (CDC27Hs) (H-NUC)	0.83267	3	1	45.257	SEKALDTLNK	691	S	yes
P30260	Cell division cycle protein 27 homolog (Anaphase-promoting complex subunit 3) (APC3) (CDC27 homolog) (CDC27Hs) (H-NUC)	0.83267	3	1	45.257	SEKALDTLNK	685	T	yes
P30260	Cell division cycle protein 27 homolog (Anaphase-promoting complex subunit 3) (APC3) (CDC27 homolog) (CDC27Hs) (H-NUC)	3.9239	3	1	43.419	KSEKALDTLNK	685	S	yes
P30291	Wee1-like protein kinase (WEE1hu) (EC 2.7.10.2) (Wee1A kinase)	0.79894	3	0.969197	60.59	STTQSNRTSR	622	S	yes
P30414	NK-tumor recognition protein (NK-TR protein) (Natural-killer cells cyclophilin-related protein) (Peptidyl-prolyl cis-trans isomerase NKTR) (PPIase) (EC 5.2.1.8) (Rotamase)	1.6807	3	0.999745	71.614	RSVDSSAK	274	S	yes
P30414	NK-tumor recognition protein (NK-TR protein) (Natural-killer cells cyclophilin-related protein) (Peptidyl-prolyl cis-trans isomerase NKTR) (PPIase) (EC 5.2.1.8) (Rotamase)	0.016497	4	0.988478	65.224	SSSYDPHSR	1390	S	yes
P30414	NK-tumor recognition protein (NK-TR protein) (Natural-killer cells cyclophilin-related protein) (Peptidyl-prolyl cis-trans isomerase NKTR) (PPIase) (EC 5.2.1.8) (Rotamase)	2.8449	2	0.812643	48.115	SSESSPRSR	685	S	yes
P30414	NK-tumor recognition protein (NK-TR protein) (Natural-killer cells cyclophilin-related protein) (Peptidyl-prolyl cis-trans isomerase NKTR) (PPIase) (EC 5.2.1.8) (Rotamase)	0.065028	2	1	46.994	ENLKREHTK	990	T	yes
P30622	CAP-Gly domain-containing linker protein 1 (Cytoplasmic linker protein 1) (Cytoplasmic linker protein 170 alpha-2) (CLIP-170) (Reed-Sternberg intermediate filament-associated protein) (Restin)	0.12404	3	0.999635	86.699	GIFTRPSKLTR	119	T	yes
P30622	CAP-Gly domain-containing linker protein 1 (Cytoplasmic linker protein 1) (Cytoplasmic linker protein 170 alpha-2) (CLIP-170) (Reed-Sternberg intermediate filament-associated protein) (Restin)	3.31	2	1	55.176	AEQSQQEAAKK	989	S	yes
P32780	General transcription factor IIH subunit 1 (Basic transcription factor 2 62 kDa subunit) (BTF2 p62) (General transcription factor IIH polypeptide 1) (TFIIH basal transcription factor complex p62 subunit)	2.4444	3	0.999713	47.621	KFTISHMYADIKCQK	43	T	yes
P33076	MHC class II transactivator (CIITA) (EC 2.3.1.-) (EC 2.7.11.1)	2.4503	4	1	63.473	FTIEPFKAK	916	T	yes
P33076	MHC class II transactivator (CIITA) (EC 2.3.1.-) (EC 2.7.11.1)	1.6581	3	1	49.418	VLPDMVSLR	1073	S	yes
P33241	Lymphocyte-specific protein 1 (47 kDa actin-binding protein) (52 kDa phosphoprotein) (pp52) (Lymphocyte-specific antigen WP34)	0.5433	3	1	102.05	KSLWEQKGGSK	303	S	yes
P33241	Lymphocyte-specific protein 1 (47 kDa actin-binding protein) (52 kDa phosphoprotein) (pp52) (Lymphocyte-specific antigen WP34)	1.0133	2,3	1	102.05	KSLWEQKGGSK	302	S	yes
P33241	Lymphocyte-specific protein 1 (47 kDa actin-binding protein) (52 kDa phosphoprotein) (pp52) (Lymphocyte-specific antigen WP34)	1.0133	2,3	1	102.05	SLWEQKGGSK	303	S	yes
P33241	Lymphocyte-specific protein 1 (47 kDa actin-binding protein) (52 kDa phosphoprotein) (pp52) (Lymphocyte-specific antigen WP34)	0.63505	2	0.999888	42.031	SLWEQKGGSK	304	S	yes
P35398	Nuclear receptor ROR-alpha (Nuclear receptor RZR-alpha) (Nuclear receptor subfamily 1 group F member 1) (RAR-related orphan receptor A) (Retinoid-related orphan receptor-alpha)	3.2889	3	0.962806	69.148	RQSYSSTSRGISVTK	49	S	yes
P35398	Nuclear receptor ROR-alpha (Nuclear receptor RZR-alpha) (Nuclear receptor subfamily 1 group F member 1) (RAR-related orphan receptor A) (Retinoid-related orphan receptor-alpha)	5.0917	3	1	50.452	ITEAIQYVVEFAKR	328	T	yes
P35573	Glycogen debranching enzyme (Glycogen debrancher) [Includes: 4-alpha-glucanotransferase (EC 2.4.1.25) (Oligo-1,4-1,4-glucantransferase); Amylo-alpha-1,6-glucosidase (Amylo-1,6-glucosidase) (EC 3.2.1.33) (Dextrin 6-alpha-D-glucosidase)]	1.8022	3	1	70.68	NIILAFAGTLR	1130	T	yes
P35573	Glycogen debranching enzyme (Glycogen debrancher) [Includes: 4-alpha-glucanotransferase (EC 2.4.1.25) (Oligo-1,4-1,4-glucantransferase); Amylo-alpha-1,6-glucosidase (Amylo-1,6-glucosidase) (EC 3.2.1.33) (Dextrin 6-alpha-D-glucosidase)]	3.5263	2	0.993285	62.694	LMGPETTAK	1474	T	yes
P35573	Glycogen debranching enzyme (Glycogen debrancher) [Includes: 4-alpha-glucanotransferase (EC 2.4.1.25) (Oligo-1,4-1,4-glucantransferase); Amylo-alpha-1,6-glucosidase (Amylo-1,6-glucosidase) (EC 3.2.1.33) (Dextrin 6-alpha-D-glucosidase)]	4.5782	2	0.976559	59.227	KLMGPETTAK	1474	T	yes
P35612	Beta-adducin (Erythrocyte adducin subunit beta)	3.5882	4	1	42.348	EEEQTAEEILSK	657	T	yes
P35612	Beta-adducin (Erythrocyte adducin subunit beta)	3.5882	4	1	42.348	EEEQTAEEILSK	663	S	yes
P35658	Nuclear pore complex protein Nup214 (214 kDa nucleoporin) (Nucleoporin Nup214) (Protein CAN)	0.059724	4,5	0.996169	129.06	SHLVHGSSPGVMGTSVATSASK	1058	S	yes
P35658	Nuclear pore complex protein Nup214 (214 kDa nucleoporin) (Nucleoporin Nup214) (Protein CAN)	0.095168	3,4	0.490748	107.09	SHLVHGSSPGVMGTSVATSASK	1056	S	yes
P35658	Nuclear pore complex protein Nup214 (214 kDa nucleoporin) (Nucleoporin Nup214) (Protein CAN)	0.10735	2,3	1	98.629	SAFLSQR	974	S	yes
P35658	Nuclear pore complex protein Nup214 (214 kDa nucleoporin) (Nucleoporin Nup214) (Protein CAN)	0.095168	3	0.329005	56.527	SHLVHGSSPGVMGTSVATSASK	1055	T	yes
P35663	Cylicin-1 (Cylicin I) (Multiple-band polypeptide I)	1.6598	3	0.459563	62.357	KSSDAESEDSKDAK	296	S	yes
P35663	Cylicin-1 (Cylicin I) (Multiple-band polypeptide I)	1.6598	3	0.459563	62.357	KSSDAESEDSKDAK	295	S	yes
P35711	Transcription factor SOX-5	1.0485	4	0.884035	49.773	KMEELIKNEPEETPSIEK	164	S	yes
P35789	Zinc finger protein 93 (Zinc finger protein 505) (Zinc finger protein HTF34)	0.73726	2	0.982505	60.398	AFISPSSLSR	609	S	yes
P35789	Zinc finger protein 93 (Zinc finger protein 505) (Zinc finger protein HTF34)	0.082592	2	0.803277	48.608	KAFISPSSLSR	607	S	yes
P36543	V-type proton ATPase subunit E 1 (V-ATPase subunit E 1) (V-ATPase 31 kDa subunit) (p31) (Vacuolar proton pump subunit E 1)	4.5678	3	0.999731	111.5	KIKVSNTLESR	193	S	yes
P36871	Phosphoglucomutase-1 (PGM 1) (EC 5.4.2.2) (Glucose phosphomutase 1)	4.4245	3	0.996557	55.064	LSGTGSAGATIR	505	S	yes
P36957	Dihydrolipoyllysine-residue succinyltransferase component of 2-oxoglutarate dehydrogenase complex, mitochondrial (EC 2.3.1.61) (2-oxoglutarate dehydrogenase complex component E2) (OGDC-E2) (Dihydrolipoamide succinyltransferase component of 2-oxoglutarate dehydrogenase complex) (E2K)	0.25479	3	0.999914	55.899	MLSRSRCVSR	3	S	yes
P36957	Dihydrolipoyllysine-residue succinyltransferase component of 2-oxoglutarate dehydrogenase complex, mitochondrial (EC 2.3.1.61) (2-oxoglutarate dehydrogenase complex component E2) (OGDC-E2) (Dihydrolipoamide succinyltransferase component of 2-oxoglutarate dehydrogenase complex) (E2K)	2.9121	3	0.847574	42.869	LSRSRCVSR	5	S	yes
P40818	Ubiquitin carboxyl-terminal hydrolase 8 (EC 3.4.19.12) (Deubiquitinating enzyme 8) (Ubiquitin isopeptidase Y) (hUBPy) (Ubiquitin thioesterase 8) (Ubiquitin-specific-processing protease 8)	1.1117	3	1	74.944	KTQKSNGEK	164	S	yes
P40818	Ubiquitin carboxyl-terminal hydrolase 8 (EC 3.4.19.12) (Deubiquitinating enzyme 8) (Ubiquitin isopeptidase Y) (hUBPy) (Ubiquitin thioesterase 8) (Ubiquitin-specific-processing protease 8)	1.1117	3	1	74.944	SNGEKNEK	167	S	yes
P40818	Ubiquitin carboxyl-terminal hydrolase 8 (EC 3.4.19.12) (Deubiquitinating enzyme 8) (Ubiquitin isopeptidase Y) (hUBPy) (Ubiquitin thioesterase 8) (Ubiquitin-specific-processing protease 8)	1.1117	2,3	0.998188	56.043	KTQKSNGEK	167	T	yes
P40855	Peroxisomal biogenesis factor 19 (33 kDa housekeeping protein) (Peroxin-19) (Peroxisomal farnesylated protein)	3.2821	2	0.999108	41.08	SPGDTAK	54	S	yes
P42568	Protein AF-9 (ALL1-fused gene from chromosome 9 protein) (Myeloid/lymphoid or mixed-lineage leukemia translocated to chromosome 3 protein) (YEATS domain-containing protein 3)	1.2829	3	0.999913	55.37	EKPSKDSR	211	S	yes
P42694	Probable helicase with zinc finger domain (EC 3.6.4.-) (Down-regulated in human cancers protein)	0.023923	2,3	1	72.643	TKEYIFLR	563	T	yes
P42694	Probable helicase with zinc finger domain (EC 3.6.4.-) (Down-regulated in human cancers protein)	1.3281	2	1	66.92	RLSDVNVER	973	S	yes
P42704	Leucine-rich PPR motif-containing protein, mitochondrial (130 kDa leucine-rich protein) (LRP 130) (GP130)	1.1058	3	0.973415	62.287	VFNDTCRSGGLGGSHALLLLR	112	T	yes
P42858	Huntingtin (Huntington disease protein) (HD protein)	4.9838	3	0.988748	71.296	LGSSSVR	1348	S	yes
P42858	Huntingtin (Huntington disease protein) (HD protein)	3.572	2	0.996769	66.799	ITAAATR	1796	T	yes
P42858	Huntingtin (Huntington disease protein) (HD protein)	1.5056	3	0.808249	62.287	AALPSLTNPPSLSPIR	1177	S	yes
P42858	Huntingtin (Huntington disease protein) (HD protein)	5.7665	3	1	49.536	KSGMFRR	1789	S	yes
P43121	Cell surface glycoprotein MUC18 (Cell surface glycoprotein P1H12) (Melanoma cell adhesion molecule) (Melanoma-associated antigen A32) (Melanoma-associated antigen MUC18) (S-endo 1 endothelial-associated antigen) (CD antigen CD146)	5.2269	3	0.999946	49.482	RSGKQEITLPPSR	593	S	yes
P43366	Melanoma-associated antigen B1 (Cancer/testis antigen 3.1) (CT3.1) (DSS-AHC critical interval MAGE superfamily 10) (DAM10) (MAGE-B1 antigen) (MAGE-XP antigen)	0.192	2	0.753879	67.234	TTATTFRARSR	327	T	yes
P43405	Tyrosine-protein kinase SYK (EC 2.7.10.2) (Spleen tyrosine kinase) (p72-Syk)	3.5996	4	1	46.543	PQGVQPKTGPFEDLKENLIR	117	T	yes
P46013	Proliferation marker protein Ki-67 (Antigen identified by monoclonal antibody Ki-67) (Antigen KI-67) (Antigen Ki67)	0.15765	3	1	73.885	RGQKATLLQQR	912	T	yes
P46013	Proliferation marker protein Ki-67 (Antigen identified by monoclonal antibody Ki-67) (Antigen KI-67) (Antigen Ki67)	2.5533	3	0.997458	41.621	SPPPELTDTATSTKR	2588	S	yes
P46020	Phosphorylase b kinase regulatory subunit alpha, skeletal muscle isoform (Phosphorylase kinase alpha M subunit)	0.49487	3	1	54.539	TGIMQLK	1000	T	yes
P46063	ATP-dependent DNA helicase Q1 (EC 3.6.4.12) (DNA helicase, RecQ-like type 1) (RecQ1) (DNA-dependent ATPase Q1) (RecQ protein-like 1)	5.4131	2	0.996532	53.947	KAANMLQQSGSK	634	S	yes
P46939	Utrophin (Dystrophin-related protein 1) (DRP-1)	3.0068	2,3	1	44.614	ETCPLDDDVK	446	T	yes
P47902	Homeobox protein CDX-1 (Caudal-type homeobox protein 1)	5.8899	3	0.981249	52.599	SVAAGGGGGSGKTR	139	S	yes
P47902	Homeobox protein CDX-1 (Caudal-type homeobox protein 1)	0.87686	2	0.861223	45.873	SVAAGGGGGSGKTR	148	S	yes
P47914	60S ribosomal protein L29 (Cell surface heparin-binding protein HIP) (Large ribosomal subunit protein eL29)	3.6453	4	0.997426	53.252	AKSKNHTTHNQSR	4	S	yes
P47914	60S ribosomal protein L29 (Cell surface heparin-binding protein HIP) (Large ribosomal subunit protein eL29)	3.6436	3	0.980687	40.751	KSKNHTTHNQSR	13	S	yes
P47985	Cytochrome b-c1 complex subunit Rieske, mitochondrial (EC 1.10.2.2) (Complex III subunit 5) (Cytochrome b-c1 complex subunit 5) (Rieske iron-sulfur protein) (RISP) (Rieske protein UQCRFS1) (Ubiquinol-cytochrome c reductase iron-sulfur subunit) [Cleaved into: Cytochrome b-c1 complex subunit 9 (Su9) (Subunit 9) (8 kDa subunit 9) (Complex III subunit IX) (Cytochrome b-c1 complex subunit 11) (Ubiquin…	1.3977	3,4	0.499959	74.611	SSRESSEAR	103	S	yes
P47985	Cytochrome b-c1 complex subunit Rieske, mitochondrial (EC 1.10.2.2) (Complex III subunit 5) (Cytochrome b-c1 complex subunit 5) (Rieske iron-sulfur protein) (RISP) (Rieske protein UQCRFS1) (Ubiquinol-cytochrome c reductase iron-sulfur subunit) [Cleaved into: Cytochrome b-c1 complex subunit 9 (Su9) (Subunit 9) (8 kDa subunit 9) (Complex III subunit IX) (Cytochrome b-c1 complex subunit 11) (Ubiquin…	1.3977	3,4	0.499959	74.611	SSRESSEAR	102	S	yes
P47985	Cytochrome b-c1 complex subunit Rieske, mitochondrial (EC 1.10.2.2) (Complex III subunit 5) (Cytochrome b-c1 complex subunit 5) (Rieske iron-sulfur protein) (RISP) (Rieske protein UQCRFS1) (Ubiquinol-cytochrome c reductase iron-sulfur subunit) [Cleaved into: Cytochrome b-c1 complex subunit 9 (Su9) (Subunit 9) (8 kDa subunit 9) (Complex III subunit IX) (Cytochrome b-c1 complex subunit 11) (Ubiquin…	5.1105	2	0.98757	55.98	LEVLDSTKSSR	99	S	yes
P48552	Nuclear receptor-interacting protein 1 (Nuclear factor RIP140) (Receptor-interacting protein 140)	1.4983	3	0.993949	41.399	DQKPDTNLPDVTK	207	T	yes
P48634	Protein PRRC2A (HLA-B-associated transcript 2) (Large proline-rich protein BAT2) (Proline-rich and coiled-coil-containing protein 2A) (Protein G2)	3.5502	3	0.999539	67.494	LHTATSR	1619	S	yes
P49321	Nuclear autoantigenic sperm protein (NASP)	4.5982	3	0.202641	43.162	KATLVESSTSGFTPGGGGSSVSMIASR	690	S	yes
P49321	Nuclear autoantigenic sperm protein (NASP)	4.5982	3	0.202641	43.162	KATLVESSTSGFTPGGGGSSVSMIASR	683	S	yes
P49321	Nuclear autoantigenic sperm protein (NASP)	4.5982	3	0.697809	43.162	KATLVESSTSGFTPGGGGSSVSMIASR	680	S	yes
P49321	Nuclear autoantigenic sperm protein (NASP)	4.5982	3	0.202641	43.162	KATLVESSTSGFTPGGGGSSVSMIASR	679	T	yes
P49321	Nuclear autoantigenic sperm protein (NASP)	4.5982	3	0.202641	43.162	KATLVESSTSGFTPGGGGSSVSMIASR	678	T	yes
P49321	Nuclear autoantigenic sperm protein (NASP)	3.6211	4	0.999889	42.682	LTETKDGSGLEEK	408	S	yes
P49321	Nuclear autoantigenic sperm protein (NASP)	3.6211	4	0.500056	42.682	LTETKDGSGLEEK	402	T	yes
P49321	Nuclear autoantigenic sperm protein (NASP)	3.6211	4	0.500056	42.682	LTETKDGSGLEEK	404	T	yes
P49406	39S ribosomal protein L19, mitochondrial (L19mt) (MRP-L19) (39S ribosomal protein L15, mitochondrial) (L15mt) (MRP-L15) (Mitochondrial large ribosomal subunit protein bL19m)	1.4606	4	1	47.039	LEKRLDDSLLYLR	186	S	yes
P49454	Centromere protein F (CENP-F) (AH antigen) (Kinetochore protein CENPF) (Mitosin)	5.3667	3	0.999926	59.908	TEGTNLK	63	T	yes
P49736	DNA replication licensing factor MCM2 (EC 3.6.4.12) (Minichromosome maintenance protein 2 homolog) (Nuclear protein BM28)	2.2306	3	0.997412	76.165	GNDPLTSSPGR	27	S	yes
P49750	YLP motif-containing protein 1 (Nuclear protein ZAP3) (ZAP113)	1.2814	3	1	123.75	ASEPGKKR	1897	S	yes
P49759	Dual specificity protein kinase CLK1 (EC 2.7.12.1) (CDC-like kinase 1)	2.2453	3	0.489688	41.399	RSHSSAQENK	36	S	yes
P49759	Dual specificity protein kinase CLK1 (EC 2.7.12.1) (CDC-like kinase 1)	2.2453	3	0.489688	41.399	RSHSSAQENK	34	S	yes
P49790	Nuclear pore complex protein Nup153 (153 kDa nucleoporin) (Nucleoporin Nup153)	0.078619	2,3	0.749499	86.699	FGVSSSSSGPSQTLTSTGNFK	908	S	yes
P49790	Nuclear pore complex protein Nup153 (153 kDa nucleoporin) (Nucleoporin Nup153)	1.2645	3	0.442641	61.437	SSSAGFSFGTGVINSTPAPANTIVTSENK	1017	S	yes
P49790	Nuclear pore complex protein Nup153 (153 kDa nucleoporin) (Nucleoporin Nup153)	1.2645	3	0.442641	61.437	SSSAGFSFGTGVINSTPAPANTIVTSENK	1018	S	yes
P49790	Nuclear pore complex protein Nup153 (153 kDa nucleoporin) (Nucleoporin Nup153)	0.12984	3	0.198707	59.155	GFDTSSSSSNSAASSSFK	890	T	yes
P49790	Nuclear pore complex protein Nup153 (153 kDa nucleoporin) (Nucleoporin Nup153)	0.12984	3	0.198707	59.155	GFDTSSSSSNSAASSSFK	891	S	yes
P49790	Nuclear pore complex protein Nup153 (153 kDa nucleoporin) (Nucleoporin Nup153)	0.12984	3	0.198707	59.155	GFDTSSSSSNSAASSSFK	892	S	yes
P49790	Nuclear pore complex protein Nup153 (153 kDa nucleoporin) (Nucleoporin Nup153)	0.12984	3	0.198707	59.155	GFDTSSSSSNSAASSSFK	893	S	yes
P49790	Nuclear pore complex protein Nup153 (153 kDa nucleoporin) (Nucleoporin Nup153)	0.12984	3	0.198707	59.155	GFDTSSSSSNSAASSSFK	894	S	yes
P49790	Nuclear pore complex protein Nup153 (153 kDa nucleoporin) (Nucleoporin Nup153)	0.33866	3	0.435201	49.149	FGVSSSSSGPSQTLTSTGNFK	909	S	yes
P49790	Nuclear pore complex protein Nup153 (153 kDa nucleoporin) (Nucleoporin Nup153)	0.0098926	4	0.499909	43.798	STEANVLPPSSIGFTFSVPVAK	534	S	yes
P49790	Nuclear pore complex protein Nup153 (153 kDa nucleoporin) (Nucleoporin Nup153)	0.0098926	4	0.494458	43.798	STEANVLPPSSIGFTFSVPVAK	543	S	yes
P49790	Nuclear pore complex protein Nup153 (153 kDa nucleoporin) (Nucleoporin Nup153)	0.0098926	4	0.494458	43.798	STEANVLPPSSIGFTFSVPVAK	544	S	yes
P49792	E3 SUMO-protein ligase RanBP2 (EC 2.3.2.-) (358 kDa nucleoporin) (Nuclear pore complex protein Nup358) (Nucleoporin Nup358) (Ran-binding protein 2) (RanBP2) (p270)	0.27387	3	0.875044	65.627	TSPENVQDR	1399	T	yes
P51003	Poly(A) polymerase alpha (PAP-alpha) (EC 2.7.7.19) (Polynucleotide adenylyltransferase alpha)	0.93017	4	0.4546	58.723	RTSSPHKEESPK	652	T	yes
P51178	1-phosphatidylinositol 4,5-bisphosphate phosphodiesterase delta-1 (EC 3.1.4.11) (Phosphoinositide phospholipase C-delta-1) (Phospholipase C-III) (PLC-III) (Phospholipase C-delta-1) (PLC-delta-1)	1.3207	3	0.5	41.399	IIHHSGSMDQRQK	134	S	yes
P51178	1-phosphatidylinositol 4,5-bisphosphate phosphodiesterase delta-1 (EC 3.1.4.11) (Phosphoinositide phospholipase C-delta-1) (Phospholipase C-III) (PLC-III) (Phospholipase C-delta-1) (PLC-delta-1)	1.3207	3	0.5	41.399	IIHHSGSMDQRQK	132	S	yes
P51610	Host cell factor 1 (HCF) (HCF-1) (C1 factor) (CFF) (VCAF) (VP16 accessory protein) [Cleaved into: HCF N-terminal chain 1; HCF N-terminal chain 2; HCF N-terminal chain 3; HCF N-terminal chain 4; HCF N-terminal chain 5; HCF N-terminal chain 6; HCF C-terminal chain 1; HCF C-terminal chain 2; HCF C-terminal chain 3; HCF C-terminal chain 4; HCF C-terminal chain 5; HCF C-terminal chain 6]	0.29802	3	0.450576	78.225	TIPMSAIITQAGATGVTSSPGIK	775	S	yes
P51610	Host cell factor 1 (HCF) (HCF-1) (C1 factor) (CFF) (VCAF) (VP16 accessory protein) [Cleaved into: HCF N-terminal chain 1; HCF N-terminal chain 2; HCF N-terminal chain 3; HCF N-terminal chain 4; HCF N-terminal chain 5; HCF N-terminal chain 6; HCF C-terminal chain 1; HCF C-terminal chain 2; HCF C-terminal chain 3; HCF C-terminal chain 4; HCF C-terminal chain 5; HCF C-terminal chain 6]	0.29802	3	0.450576	78.225	TIPMSAIITQAGATGVTSSPGIK	771	T	yes
P51610	Host cell factor 1 (HCF) (HCF-1) (C1 factor) (CFF) (VCAF) (VP16 accessory protein) [Cleaved into: HCF N-terminal chain 1; HCF N-terminal chain 2; HCF N-terminal chain 3; HCF N-terminal chain 4; HCF N-terminal chain 5; HCF N-terminal chain 6; HCF C-terminal chain 1; HCF C-terminal chain 2; HCF C-terminal chain 3; HCF C-terminal chain 4; HCF C-terminal chain 5; HCF C-terminal chain 6]	1.0485	3	0.929895	71.031	TIPMSAIITQAGATGVTSSPGIK	779	T	yes
P51610	Host cell factor 1 (HCF) (HCF-1) (C1 factor) (CFF) (VCAF) (VP16 accessory protein) [Cleaved into: HCF N-terminal chain 1; HCF N-terminal chain 2; HCF N-terminal chain 3; HCF N-terminal chain 4; HCF N-terminal chain 5; HCF N-terminal chain 6; HCF C-terminal chain 1; HCF C-terminal chain 2; HCF C-terminal chain 3; HCF C-terminal chain 4; HCF C-terminal chain 5; HCF C-terminal chain 6]	0.35536	3	0.999353	67.234	TMAVTPGTTTLPATVK	579	T	yes
P51610	Host cell factor 1 (HCF) (HCF-1) (C1 factor) (CFF) (VCAF) (VP16 accessory protein) [Cleaved into: HCF N-terminal chain 1; HCF N-terminal chain 2; HCF N-terminal chain 3; HCF N-terminal chain 4; HCF N-terminal chain 5; HCF N-terminal chain 6; HCF C-terminal chain 1; HCF C-terminal chain 2; HCF C-terminal chain 3; HCF C-terminal chain 4; HCF C-terminal chain 5; HCF C-terminal chain 6]	0.48008	3	0.965616	64.798	VMTSGTGAPAK	808	T	yes
P51610	Host cell factor 1 (HCF) (HCF-1) (C1 factor) (CFF) (VCAF) (VP16 accessory protein) [Cleaved into: HCF N-terminal chain 1; HCF N-terminal chain 2; HCF N-terminal chain 3; HCF N-terminal chain 4; HCF N-terminal chain 5; HCF N-terminal chain 6; HCF C-terminal chain 1; HCF C-terminal chain 2; HCF C-terminal chain 3; HCF C-terminal chain 4; HCF C-terminal chain 5; HCF C-terminal chain 6]	0.84918	5	0.434487	58.755	TAAAQVGTSVSSATNTSTRPIITVHK	627	T	yes
P51816	AF4/FMR2 family member 2 (Fragile X E mental retardation syndrome protein) (Fragile X mental retardation 2 protein) (FMR2P) (Protein FMR-2) (Protein Ox19)	2.2729	3	0.999959	129.74	PSAASSKTKLPK	329	S	yes
P51826	AF4/FMR2 family member 3 (Lymphoid nuclear protein related to AF4) (Protein LAF-4)	1.4525	2	0.999938	125.82	TTSDIAK	730	T	yes
P52179	Myomesin-1 (190 kDa connectin-associated protein) (190 kDa titin-associated protein) (Myomesin family member 1)	0.63694	4	0.999945	80.706	GELSAYASVVVK	362	S	yes
P52564	Dual specificity mitogen-activated protein kinase kinase 6 (MAP kinase kinase 6) (MAPKK 6) (EC 2.7.12.2) (MAPK/ERK kinase 6) (MEK 6) (Stress-activated protein kinase kinase 3) (SAPK kinase 3) (SAPKK-3) (SAPKK3)	0.60252	2	0.983226	60.398	MSQSKGK	2	S	yes
P52594	Arf-GAP domain and FG repeat-containing protein 1 (HIV-1 Rev-binding protein) (Nucleoporin-like protein RIP) (Rev-interacting protein) (Rev/Rex activation domain-binding protein)	0.002246	3,4	0.471477	164.8	SSSADFGTFNTSQSHQTASAVSK	291	S	yes
P52594	Arf-GAP domain and FG repeat-containing protein 1 (HIV-1 Rev-binding protein) (Nucleoporin-like protein RIP) (Rev-interacting protein) (Rev/Rex activation domain-binding protein)	0.002246	3,4	0.471477	164.8	SSSADFGTFNTSQSHQTASAVSK	292	S	yes
P52594	Arf-GAP domain and FG repeat-containing protein 1 (HIV-1 Rev-binding protein) (Nucleoporin-like protein RIP) (Rev-interacting protein) (Rev/Rex activation domain-binding protein)	0.0065123	3,4	0.333333	147.53	SSSADFGTFNTSQSHQTASAVSK	293	S	yes
P52746	Zinc finger protein 142 (HA4654)	5.6147	3	0.99815	40.725	SKLKTHLLR	204	S	yes
P52789	Hexokinase-2 (EC 2.7.1.1) (Hexokinase type II) (HK II) (Muscle form hexokinase)	4.7823	2	0.999999	72.096	ISERLKTR	778	T	yes
P52824	Diacylglycerol kinase theta (DAG kinase theta) (EC 2.7.1.107) (Diglyceride kinase theta) (DGK-theta)	5.9639	3	0.5	41.378	FTSRLHNKGVYVR	771	S	yes
P52824	Diacylglycerol kinase theta (DAG kinase theta) (EC 2.7.1.107) (Diglyceride kinase theta) (DGK-theta)	5.9639	3	0.5	41.378	FTSRLHNKGVYVR	770	T	yes
P53814	Smoothelin	0.22936	2	1	47.603	KLLSGPK	267	S	yes
P54819	Adenylate kinase 2, mitochondrial (AK 2) (EC 2.7.4.3) (ATP-AMP transphosphorylase 2) (ATP:AMP phosphotransferase) (Adenylate monophosphate kinase) [Cleaved into: Adenylate kinase 2, mitochondrial, N-terminally processed]	1.6564	4	1	73.273	MAPSVPAAEPEYPK	4	S	yes
P55196	Afadin (ALL1-fused gene from chromosome 6 protein) (Protein AF-6) (Afadin adherens junction formation factor)	5.706	2	0.996848	85.973	EPEIITVTLK	1009	T	yes
P55196	Afadin (ALL1-fused gene from chromosome 6 protein) (Protein AF-6) (Afadin adherens junction formation factor)	3.0184	3	0.943171	55.755	TQDASGPELILPASIEFR	591	T	yes
P55196	Afadin (ALL1-fused gene from chromosome 6 protein) (Protein AF-6) (Afadin adherens junction formation factor)	5.4781	3	0.966041	41.378	EYFTFPASKSQDR	1238	S	yes
P55916	Mitochondrial uncoupling protein 3 (UCP 3) (Solute carrier family 25 member 9)	4.4908	4	1	71.877	IGLYDSVK	101	S	yes
P56385	ATP synthase subunit e, mitochondrial (ATPase subunit e) (ATP synthase membrane subunit e) [Cleaved into: ATP synthase subunit e, mitochondrial, N-terminally processed]	0.95375	3	0.999999	63.691	YSALFLGVAYGATR	17	S	yes
P56524	Histone deacetylase 4 (HD4) (EC 3.5.1.98)	4.7311	3	0.499411	91.812	SSQSHPDGLSGR	3	S	yes
P56524	Histone deacetylase 4 (HD4) (EC 3.5.1.98)	4.7311	3	0.499411	91.812	SSQSHPDGLSGR	5	S	yes
P56715	Oxygen-regulated protein 1 (Retinitis pigmentosa 1 protein) (Retinitis pigmentosa RP1 protein)	0.36611	2	1	64.798	SLVVFRNGDPK	155	S	yes
P56715	Oxygen-regulated protein 1 (Retinitis pigmentosa 1 protein) (Retinitis pigmentosa RP1 protein)	1.2309	2	0.498214	48.602	WTTTVSK	352	T	yes
P56715	Oxygen-regulated protein 1 (Retinitis pigmentosa 1 protein) (Retinitis pigmentosa RP1 protein)	5.3495	2	0.45892	48.602	WTTTVSK	350	T	yes
P56715	Oxygen-regulated protein 1 (Retinitis pigmentosa 1 protein) (Retinitis pigmentosa RP1 protein)	1.2309	2	0.498214	46.39	WTTTVSK	351	T	yes
P56715	Oxygen-regulated protein 1 (Retinitis pigmentosa 1 protein) (Retinitis pigmentosa RP1 protein)	1.0836	3	0.485641	42.843	SSETLALLEILK	1157	S	yes
P56715	Oxygen-regulated protein 1 (Retinitis pigmentosa 1 protein) (Retinitis pigmentosa RP1 protein)	1.0836	3	0.485641	42.843	SSETLALLEILK	1158	S	yes
P57075	Ubiquitin-associated and SH3 domain-containing protein A (Cbl-interacting protein 4) (CLIP4) (Suppressor of T-cell receptor signaling 2) (STS-2) (T-cell ubiquitin ligand 1) (TULA-1)	3.3296	3	0.807977	58.674	YTFSLATDLNSRK	352	T	yes
P57103	Sodium/calcium exchanger 3 (Na(+)/Ca(2+)-exchange protein 3) (Solute carrier family 8 member 3)	0.4724	3	0.999988	58.23	TVEGTAK	568	T	yes
P57740	Nuclear pore complex protein Nup107 (107 kDa nucleoporin) (Nucleoporin Nup107)	5.4825	2	1	57.59	LYLVFSK	893	S	yes
P57740	Nuclear pore complex protein Nup107 (107 kDa nucleoporin) (Nucleoporin Nup107)	2.5541	3	0.99952	50.088	QPFTPTSRSLLR	64	T	yes
P57768	Sorting nexin-16	4.668	4	0.972649	71.279	TKFTGTASSIEYSTRPR	75	T	yes
P57771	Regulator of G-protein signaling 8 (RGS8)	0.31164	3	0.500027	43.027	STAKLVSK	103	S	yes
P57771	Regulator of G-protein signaling 8 (RGS8)	0.31164	3	0.999946	43.027	STAKLVSK	98	S	yes
P57771	Regulator of G-protein signaling 8 (RGS8)	0.31164	3	0.500027	43.027	STAKLVSK	97	T	yes
P60484	Phosphatidylinositol 3,4,5-trisphosphate 3-phosphatase and dual-specificity protein phosphatase PTEN (EC 3.1.3.16) (EC 3.1.3.48) (EC 3.1.3.67) (Mutated in multiple advanced cancers 1) (Phosphatase and tensin homolog)	0.5681	3	0.831805	78.342	IYSSNSGPTR	227	S	yes
P61160	Actin-related protein 2 (Actin-like protein 2)	4.2943	3	0.999413	43.946	HIVLSGGSTMYPGLPSR	315	S	yes
P61571	Endogenous retrovirus group K member 21 Rec protein (HERV-K_12q14.1 provirus Rec protein)	0.87222	3	0.495992	40.676	VTSEQMKLPSTK	41	S	yes
P61571	Endogenous retrovirus group K member 21 Rec protein (HERV-K_12q14.1 provirus Rec protein)	0.87222	3	0.495992	40.676	VTSEQMKLPSTK	40	T	yes
P61764	Syntaxin-binding protein 1 (MUNC18-1) (N-Sec1) (Protein unc-18 homolog 1) (Unc18-1) (Protein unc-18 homolog A) (Unc-18A) (p67)	2.4723	3	0.824046	43.03	MNTGEKTTMR	323	T	yes
P62685		3.0445	3	0.5	64.82	RGGVKVSTK	31;31;31;31;31;31;31;31;31;31	S	yes
P62685	Endogenous retrovirus group K member 8 Gag polyprotein (HERV-K115 Gag protein) (HERV-K_8p23.1 provirus ancestral Gag polyprotein) (Gag polyprotein)	2.326	2	0.994949	40.516	LNPTAPPSR	254	T	yes
P62701	40S ribosomal protein S4, X isoform (SCR10) (Single copy abundant mRNA protein) (Small ribosomal subunit protein eS4)	0.48878	2	1	45.081	ITPEEAK	115	T	yes
P78316	Nucleolar protein 14 (Nucleolar complex protein 14)	5.2335	2	1	40.352	AQPSNRMK	269	S	yes
P78332	RNA-binding protein 6 (Lung cancer antigen NY-LU-12) (Protein G16) (RNA-binding motif protein 6) (RNA-binding protein DEF-3)	1.4647	2	0.996797	85.973	TGPSEEKPSR	450	S	yes
P78332	RNA-binding protein 6 (Lung cancer antigen NY-LU-12) (Protein G16) (RNA-binding motif protein 6) (RNA-binding protein DEF-3)	1.4647	2	0.839949	85.973	TGPSEEKPSR	447	T	yes
P78527	DNA-dependent protein kinase catalytic subunit (DNA-PK catalytic subunit) (DNA-PKcs) (EC 2.7.11.1) (DNPK1) (p460)	1.3019	2	0.999937	53.034	AALSALESFLK	318	S	yes
P78545	ETS-related transcription factor Elf-3 (E74-like factor 3) (Epithelial-restricted with serine box) (Epithelium-restricted Ets protein ESX) (Epithelium-specific Ets transcription factor 1) (ESE-1)	4.4801	3	0.5	50.353	KKNSNMTYEK	325	S	yes
P78545	ETS-related transcription factor Elf-3 (E74-like factor 3) (Epithelial-restricted with serine box) (Epithelium-restricted Ets protein ESX) (Epithelium-specific Ets transcription factor 1) (ESE-1)	4.4801	3	0.5	50.353	KKNSNMTYEK	322	T	yes
P81877	Single-stranded DNA-binding protein 2 (Sequence-specific single-stranded-DNA-binding protein 2)	1.5164	3	0.495081	63.727	SNSSAVPSDSQAR	10	S	yes
P81877	Single-stranded DNA-binding protein 2 (Sequence-specific single-stranded-DNA-binding protein 2)	1.5164	3	0.495081	63.727	SNSSAVPSDSQAR	9	S	yes
P82912	28S ribosomal protein S11, mitochondrial (MRP-S11) (S11mt) (Cervical cancer proto-oncogene 2 protein) (HCC-2) (Mitochondrial small ribosomal subunit protein uS11m)	0.059722	2,3	0.999543	54.539	FLRSWTWPQTAGR	20	T	yes
P82933	28S ribosomal protein S9, mitochondrial (MRP-S9) (S9mt) (Mitochondrial small ribosomal subunit protein uS9m)	3.285	3	0.995079	67.494	SVTLESK	249	T	yes
P98175	RNA-binding protein 10 (G patch domain-containing protein 9) (RNA-binding motif protein 10) (RNA-binding protein S1-1) (S1-1)	1.2202	3	0.99987	64.798	LASDDRPSPPR	723	S	yes
Q00613	Heat shock factor protein 1 (HSF 1) (Heat shock transcription factor 1) (HSTF 1)	0.011088	3	0.499263	70.089	KVTSVSTLKSEDIK	123	S	yes
Q00613	Heat shock factor protein 1 (HSF 1) (Heat shock transcription factor 1) (HSTF 1)	0.011088	3	0.499263	70.089	KVTSVSTLKSEDIK	124	T	yes
Q01082	Spectrin beta chain, non-erythrocytic 1 (Beta-II spectrin) (Fodrin beta chain) (Spectrin, non-erythroid beta chain 1)	0.00015643	3	0.785361	99.788	HEVSASTQSTPASSR	2324	S	yes
Q01082	Spectrin beta chain, non-erythrocytic 1 (Beta-II spectrin) (Fodrin beta chain) (Spectrin, non-erythroid beta chain 1)	4.2577	4	0.998907	93.143	STDEVDSKR	1452	S	yes
Q01082	Spectrin beta chain, non-erythrocytic 1 (Beta-II spectrin) (Fodrin beta chain) (Spectrin, non-erythroid beta chain 1)	3.655	3	0.999992	86.014	RPPSPEPSTK	2102	S	yes
Q01082	Spectrin beta chain, non-erythrocytic 1 (Beta-II spectrin) (Fodrin beta chain) (Spectrin, non-erythroid beta chain 1)	0.022732	3	0.773327	85.006	HEVSASTQSTPASSR	2320	T	yes
Q01082	Spectrin beta chain, non-erythrocytic 1 (Beta-II spectrin) (Fodrin beta chain) (Spectrin, non-erythroid beta chain 1)	0.00016745	3	0.412265	85.006	HEVSASTQSTPASSR	2323	S	yes
Q01082	Spectrin beta chain, non-erythrocytic 1 (Beta-II spectrin) (Fodrin beta chain) (Spectrin, non-erythroid beta chain 1)	0.23768	3	0.5	70.54	LTTLELLEVR	2080	T	yes
Q01082	Spectrin beta chain, non-erythrocytic 1 (Beta-II spectrin) (Fodrin beta chain) (Spectrin, non-erythroid beta chain 1)	0.23768	3	0.5	70.54	LTTLELLEVR	2081	T	yes
Q01082	Spectrin beta chain, non-erythrocytic 1 (Beta-II spectrin) (Fodrin beta chain) (Spectrin, non-erythroid beta chain 1)	0.6805	3	0.998644	42.083	PETEAVVKEKLTGLHK	1356	T	yes
Q01085	Nucleolysin TIAR (TIA-1-related protein)	1.1738	2,3	0.997698	113.07	VVKDMATGKSK	137	T	yes
Q01085	Nucleolysin TIAR (TIA-1-related protein)	4.3351	2	0.809566	45.28	VVKDMATGKSK	134	S	yes
Q01105	Protein SET (HLA-DR-associated protein II) (Inhibitor of granzyme A-activated DNase) (IGAAD) (PHAPII) (Phosphatase 2A inhibitor I2PP2A) (I-2PP2A) (Template-activating factor I) (TAF-I)	4.8871	4	0.971786	46.352	KRSSQTQNK	186	T	yes
Q01201	Transcription factor RelB (I-Rel)	2.6138	3	1	121.99	TLPAIELR	163	T	yes
Q01433	AMP deaminase 2 (EC 3.5.4.6) (AMP deaminase isoform L)	1.9339	3	1	46.663	KYLQQLAEKPLETR	281	T	yes
Q01433	AMP deaminase 2 (EC 3.5.4.6) (AMP deaminase isoform L)	2.2219	3	1	42.947	EQGEGQGDRSLRER	208	S	yes
Q01484	Ankyrin-2 (ANK-2) (Ankyrin-B) (Brain ankyrin) (Non-erythroid ankyrin)	2.4953	2	0.99902	84.568	SGAIDMTK	3120	T	yes
Q01664	Transcription factor AP-4 (Activating enhancer-binding protein 4) (Class C basic helix-loop-helix protein 41) (bHLHc41)	3.2818	2	1	87.713	KVPSLQHFR	13	S	yes
Q01831	DNA repair protein complementing XP-C cells (Xeroderma pigmentosum group C-complementing protein) (p125)	2.0551	3	0.997696	55.899	GTKQEETFAK	371	T	yes
Q01831	DNA repair protein complementing XP-C cells (Xeroderma pigmentosum group C-complementing protein) (p125)	0.14085	4	1	52.725	MVKGFSNRAR	711	S	yes
Q02040	A-kinase anchor protein 17A (AKAP-17A) (721P) (B-lymphocyte antigen) (Protein XE7) (Protein kinase A-anchoring protein 17A) (PRKA17A) (Splicing factor, arginine/serine-rich 17A)	5.2547	3	1	74.173	SEQDKCNR	574	S	yes
Q02224	Centromere-associated protein E (Centromere protein E) (CENP-E) (Kinesin-7) (Kinesin-related protein CENPE)	3.4363	4	0.994717	63.473	TIQISDIQKDLDK	1951	T	yes
Q02241	Kinesin-like protein KIF23 (Kinesin-like protein 5) (Mitotic kinesin-like protein 1)	0.31218	3	0.999075	80.688	TCIVSDR	758	T	yes
Q02790	Peptidyl-prolyl cis-trans isomerase FKBP4 (PPIase FKBP4) (EC 5.2.1.8) (51 kDa FK506-binding protein) (FKBP51) (52 kDa FK506-binding protein) (52 kDa FKBP) (FKBP-52) (59 kDa immunophilin) (p59) (FK506-binding protein 4) (FKBP-4) (FKBP59) (HSP-binding immunophilin) (HBI) (Immunophilin FKBP52) (Rotamase) [Cleaved into: Peptidyl-prolyl cis-trans isomerase FKBP4, N-terminally processed]	3.8386	3	1	45.115	VGEVCHITCK	106	T	yes
Q03001	Dystonin (230 kDa bullous pemphigoid antigen) (230/240 kDa bullous pemphigoid antigen) (Bullous pemphigoid antigen 1) (BPA) (Bullous pemphigoid antigen) (Dystonia musculorum protein) (Hemidesmosomal plaque protein)	4.1586	3	0.5	94.409	QEFIDGILSSK	7228	S	yes
Q03001	Dystonin (230 kDa bullous pemphigoid antigen) (230/240 kDa bullous pemphigoid antigen) (Bullous pemphigoid antigen 1) (BPA) (Bullous pemphigoid antigen) (Dystonia musculorum protein) (Hemidesmosomal plaque protein)	4.1586	3	0.5	94.409	QEFIDGILSSK	7229	S	yes
Q03001	Dystonin (230 kDa bullous pemphigoid antigen) (230/240 kDa bullous pemphigoid antigen) (Bullous pemphigoid antigen 1) (BPA) (Bullous pemphigoid antigen) (Dystonia musculorum protein) (Hemidesmosomal plaque protein)	5.9145	3	0.988958	89.403	TSSVQALKR	6868	T	yes
Q03001	Dystonin (230 kDa bullous pemphigoid antigen) (230/240 kDa bullous pemphigoid antigen) (Bullous pemphigoid antigen 1) (BPA) (Bullous pemphigoid antigen) (Dystonia musculorum protein) (Hemidesmosomal plaque protein)	0.9422	3	0.876274	79.23	TNWDTFNKQVKER	4934	T	yes
Q03001	Dystonin (230 kDa bullous pemphigoid antigen) (230/240 kDa bullous pemphigoid antigen) (Bullous pemphigoid antigen 1) (BPA) (Bullous pemphigoid antigen) (Dystonia musculorum protein) (Hemidesmosomal plaque protein)	0.84389	3	0.600331	75.652	EISSHGLPSDK	4331	S	yes
Q03164	Histone-lysine N-methyltransferase 2A (Lysine N-methyltransferase 2A) (EC 2.1.1.43) (ALL-1) (CXXC-type zinc finger protein 7) (Myeloid/lymphoid or mixed-lineage leukemia) (Myeloid/lymphoid or mixed-lineage leukemia protein 1) (Trithorax-like protein) (Zinc finger protein HRX) [Cleaved into: MLL cleavage product N320 (N-terminal cleavage product of 320 kDa) (p320); MLL cleavage product C180 (C-ter…	4.951	3	0.988917	56.121	RTPSATFQQATKIK	259	T	yes
Q03164	Histone-lysine N-methyltransferase 2A (Lysine N-methyltransferase 2A) (EC 2.1.1.43) (ALL-1) (CXXC-type zinc finger protein 7) (Myeloid/lymphoid or mixed-lineage leukemia) (Myeloid/lymphoid or mixed-lineage leukemia protein 1) (Trithorax-like protein) (Zinc finger protein HRX) [Cleaved into: MLL cleavage product N320 (N-terminal cleavage product of 320 kDa) (p320); MLL cleavage product C180 (C-ter…	3.3655	2	0.952195	48.115	SFGSRTTKK	540	S	yes
Q03188	Centromere protein C (CENP-C) (Centromere autoantigen C) (Centromere protein C 1) (CENP-C 1) (Interphase centromere complex protein 7)	5.1615	3	1	93.442	TRLKPLEYWR	743	T	yes
Q03188	Centromere protein C (CENP-C) (Centromere autoantigen C) (Centromere protein C 1) (CENP-C 1) (Interphase centromere complex protein 7)	5.3162	2	0.989608	62.659	TNQSSKNIR	568	S	yes
Q03518	Antigen peptide transporter 1 (APT1) (ATP-binding cassette sub-family B member 2) (Peptide supply factor 1) (Peptide transporter PSF1) (PSF-1) (Peptide transporter TAP1) (Peptide transporter involved in antigen processing 1) (Really interesting new gene 4 protein)	0.26143	3	0.994757	54.539	VPMASSR	63	S	yes
Q04727	Transducin-like enhancer protein 4 (Grg-4) (Groucho-related protein 4)	4.1187	3	0.958227	63.16	SSSVSPSASFR	212	S	yes
Q04727	Transducin-like enhancer protein 4 (Grg-4) (Groucho-related protein 4)	2.5741	3	0.565869	55.213	SSSVSPSASFR	208	S	yes
Q05193	Dynamin-1 (EC 3.6.5.5)	1.2161	4	1	71.548	KTIMHLMINNTK	684	T	yes
Q05519	Serine/arginine-rich splicing factor 11 (Arginine-rich 54 kDa nuclear protein) (p54) (Splicing factor, arginine/serine-rich 11)	0.29796	3	0.999857	110.53	SHSRERGR	297	S	yes
Q05519	Serine/arginine-rich splicing factor 11 (Arginine-rich 54 kDa nuclear protein) (p54) (Splicing factor, arginine/serine-rich 11)	5.3448	2	0.973491	44.847	LSRSPSPR	370	S	yes
Q05682	Caldesmon (CDM)	0.96635	4	0.850127	59.265	PGGRASVDTK	518	S	yes
Q05823	2-5A-dependent ribonuclease (2-5A-dependent RNase) (EC 3.1.26.-) (Ribonuclease 4) (Ribonuclease L) (RNase L)	4.4243	2	0.989305	43.512	NVGNESDIKTRK	607	T	yes
Q06265	Exosome complex component RRP45 (Autoantigen PM/Scl 1) (Exosome component 9) (P75 polymyositis-scleroderma overlap syndrome-associated autoantigen) (Polymyositis/scleroderma autoantigen 1) (Polymyositis/scleroderma autoantigen 75 kDa) (PM/Scl-75)	3.9547	2	1	58.63	KITAFKMEK	295	T	yes
Q07157	Tight junction protein ZO-1 (Tight junction protein 1) (Zona occludens protein 1) (Zonula occludens protein 1)	4.119	2	0.348204	57.106	TPTSPKTLVK	1570	S	yes
Q07157	Tight junction protein ZO-1 (Tight junction protein 1) (Zona occludens protein 1) (Zonula occludens protein 1)	4.119	2	0.478645	57.106	TPTSPKTLVK	1569	T	yes
Q07157	Tight junction protein ZO-1 (Tight junction protein 1) (Zona occludens protein 1) (Zonula occludens protein 1)	1.1695	3	0.999563	44.318	YESSSYTDQFSR	1071	S	yes
Q07617	Sperm-associated antigen 1 (HSD-3.8) (Infertility-related sperm protein Spag-1)	5.0608	3	1	103.43	DKTAPFNKEK	744	T	yes
Q08170	Serine/arginine-rich splicing factor 4 (Pre-mRNA-splicing factor SRP75) (SRP001LB) (Splicing factor, arginine/serine-rich 4)	5.1381	3	0.842531	68.809	SQSRSPSRSVSK	408	S	yes
Q08378	Golgin subfamily A member 3 (Golgi complex-associated protein of 170 kDa) (GCP170) (Golgin-160)	0.14314	2	1	87.713	TMVEEDLQR	664	T	yes
Q08378	Golgin subfamily A member 3 (Golgi complex-associated protein of 170 kDa) (GCP170) (Golgin-160)	0.79793	3	0.944287	50.053	KSQGTSAEGSVRK	115	S	yes
Q08495	Dematin (Dematin actin-binding protein) (Erythrocyte membrane protein band 4.9)	1.9979	3	0.995819	70.889	QPLTSPGSVSPSR	18	S	yes
Q09472	Histone acetyltransferase p300 (p300 HAT) (EC 2.3.1.48) (E1A-associated protein p300) (Histone butyryltransferase p300) (EC 2.3.1.-) (Histone crotonyltransferase p300) (EC 2.3.1.-) (Protein propionyltransferase p300) (EC 2.3.1.-)	3.6472	4	0.499616	47.712	ESTETEERSTELK	1010	S	yes
Q09472	Histone acetyltransferase p300 (p300 HAT) (EC 2.3.1.48) (E1A-associated protein p300) (Histone butyryltransferase p300) (EC 2.3.1.-) (Histone crotonyltransferase p300) (EC 2.3.1.-) (Protein propionyltransferase p300) (EC 2.3.1.-)	3.6472	4	0.499616	47.712	ESTETEERSTELK	1009	T	yes
Q09666	Neuroblast differentiation-associated protein AHNAK (Desmoyokin)	0.095313	3	0.98387	58.712	GPQVSSALNLDTSK	5603	S	yes
Q0IIN9	Putative uncharacterized protein ZNF252P-AS1 (ZNF252P antisense RNA 1) (ZNF252P antisense gene protein 1)	1.3581	2	0.999996	67.214	STGPEGGLTR	183	T	yes
Q0IIN9	Putative uncharacterized protein ZNF252P-AS1 (ZNF252P antisense RNA 1) (ZNF252P antisense gene protein 1)	0.12053	3	0.988419	50.158	TSRGALSPSLGR	74	S	yes
Q0JRZ9	F-BAR domain only protein 2	1.395	3	0.990618	43.628	VSIGNITLSPAISR	380	S	yes
Q0JRZ9	F-BAR domain only protein 2	1.395	3	0.988217	43.628	VSIGNITLSPAISR	391	S	yes
Q0VDD8	Dynein heavy chain 14, axonemal (Axonemal beta dynein heavy chain 14) (Ciliary dynein heavy chain 14)	1.267	3	1	97.452	PESLNNSVR	3024	S	yes
Q0VDD8	Dynein heavy chain 14, axonemal (Axonemal beta dynein heavy chain 14) (Ciliary dynein heavy chain 14)	1.267	3	1	97.452	PESLNNSVR	3028	S	yes
Q0VF49	Uncharacterized protein KIAA2012	0.8479	2,3	1	101.9	RCEDPSK	971	S	yes
Q0VG99	Mesoderm posterior protein 2 (Class C basic helix-loop-helix protein 6) (bHLHc6)	2.1028	3	1	63.473	KTGPAGGQR	77	T	yes
Q10713	Mitochondrial-processing peptidase subunit alpha (Alpha-MPP) (P-55)	0.19629	2	0.5	55.567	VTTLDNGLR	71	T	yes
Q10713	Mitochondrial-processing peptidase subunit alpha (Alpha-MPP) (P-55)	0.19629	2	0.5	55.567	VTTLDNGLR	70	T	yes
Q10713	Mitochondrial-processing peptidase subunit alpha (Alpha-MPP) (P-55)	0.13209	4	0.997493	55.213	SRKLPHELCTLIR	467	T	yes
Q12789	General transcription factor 3C polypeptide 1 (TF3C-alpha) (TFIIIC box B-binding subunit) (Transcription factor IIIC 220 kDa subunit) (TFIIIC 220 kDa subunit) (TFIIIC220) (Transcription factor IIIC subunit alpha)	0.45225	2	0.999718	69.344	LSVMLSTR	263	S	yes
Q12789	General transcription factor 3C polypeptide 1 (TF3C-alpha) (TFIIIC box B-binding subunit) (Transcription factor IIIC 220 kDa subunit) (TFIIIC 220 kDa subunit) (TFIIIC220) (Transcription factor IIIC subunit alpha)	3.8287	2	0.999915	45.864	KENTAAENGLTVR	1153	T	yes
Q12830	Nucleosome-remodeling factor subunit BPTF (Bromodomain and PHD finger-containing transcription factor) (Fetal Alz-50 clone 1 protein) (Fetal Alzheimer antigen)	0.079775	2	0.999999	78.705	TPLQQSTLGK	2192	T	yes
Q12830	Nucleosome-remodeling factor subunit BPTF (Bromodomain and PHD finger-containing transcription factor) (Fetal Alz-50 clone 1 protein) (Fetal Alzheimer antigen)	3.0831	3	0.423582	71.031	TSTFQINGKDNK	1529	S	yes
Q12830	Nucleosome-remodeling factor subunit BPTF (Bromodomain and PHD finger-containing transcription factor) (Fetal Alz-50 clone 1 protein) (Fetal Alzheimer antigen)	3.0831	3	0.423582	71.031	TSTFQINGKDNK	1528	T	yes
Q12874	Splicing factor 3A subunit 3 (SF3a60) (Spliceosome-associated protein 61) (SAP 61)	2.9564	4	0.49998	60.434	STLRDQINSDHRTR	31	S	yes
Q12888	TP53-binding protein 1 (53BP1) (p53-binding protein 1) (p53BP1)	1.0319	3	0.998467	40.693	QSQQPMKPISPVK	1094	S	yes
Q12894	Interferon-related developmental regulator 2 (Protein SKMC15)	0.92623	3	0.999999	103.88	KTLATDSNK	377	T	yes
Q12894	Interferon-related developmental regulator 2 (Protein SKMC15)	2.3845	3	0.5	59.245	AWNSPSRR	5	S	yes
Q12894	Interferon-related developmental regulator 2 (Protein SKMC15)	2.3845	3	0.5	59.245	AWNSPSRR	7	S	yes
Q12894	Interferon-related developmental regulator 2 (Protein SKMC15)	0.10356	5	0.999849	43.382	SAKTRQGALESLR	152	S	yes
Q12894	Interferon-related developmental regulator 2 (Protein SKMC15)	0.10356	5	0.999089	43.382	SAKTRQGALESLR	155	T	yes
Q12906	Interleukin enhancer-binding factor 3 (Double-stranded RNA-binding protein 76) (DRBP76) (M-phase phosphoprotein 4) (MPP4) (Nuclear factor associated with dsRNA) (NFAR) (Nuclear factor of activated T-cells 90 kDa) (NF-AT-90) (Translational control protein 80) (TCP80)	1.7539	2	0.999329	59.35	SIGTANR	258	S	yes
Q12955	Ankyrin-3 (ANK-3) (Ankyrin-G)	2.5503	2	1	83.869	EKIATAPKK	2508	T	yes
Q12955	Ankyrin-3 (ANK-3) (Ankyrin-G)	4.8436	3	1	72.096	TEVVHVIR	2167	T	yes
Q12955	Ankyrin-3 (ANK-3) (Ankyrin-G)	2.2482	3	0.996166	59.227	SISDVASPIR	1563	S	yes
Q12955	Ankyrin-3 (ANK-3) (Ankyrin-G)	3.5643	3	0.966461	41.378	AIDLPDESVSVQK	2779	S	yes
Q12967	Ral guanine nucleotide dissociation stimulator (RalGDS) (Ral guanine nucleotide exchange factor) (RalGEF)	5.17	2	1	49.423	FATLEMNPK	542	T	yes
Q13023	A-kinase anchor protein 6 (AKAP-6) (A-kinase anchor protein 100 kDa) (AKAP 100) (Protein kinase A-anchoring protein 6) (PRKA6) (mAKAP)	1.1601	2	0.856598	45.997	KASSSEK	748	S	yes
Q13029	PR domain zinc finger protein 2 (EC 2.1.1.43) (GATA-3-binding protein G3B) (Lysine N-methyltransferase 8) (MTB-ZF) (MTE-binding protein) (PR domain-containing protein 2) (Retinoblastoma protein-interacting zinc finger protein) (Zinc finger protein RIZ)	1.4987	2	1	84.743	TADAEIK	1517	T	yes
Q13206	Probable ATP-dependent RNA helicase DDX10 (EC 3.6.4.13) (DEAD box protein 10)	4.6064	3	1	78.903	PGVSILALHGR	341	S	yes
Q13207	T-box transcription factor TBX2 (T-box protein 2)	3.409	2,3	0.999473	47.712	LGTEMVITK	128	T	yes
Q13287	N-myc-interactor (Nmi) (N-myc and STAT interactor)	0.071058	3	1	79.23	EDIPETKMK	67	T	yes
Q13319	Cyclin-dependent kinase 5 activator 2 (CDK5 activator 2) (Cyclin-dependent kinase 5 regulatory subunit 2) (p39) (p39I)	3.2305	3	0.913251	45.704	MGTVLSLSPASSAK	3	T	yes
Q13319	Cyclin-dependent kinase 5 activator 2 (CDK5 activator 2) (Cyclin-dependent kinase 5 regulatory subunit 2) (p39) (p39I)	5.1708	4	0.748017	42.388	GTVLSLSPASSAK	11	S	yes
Q13416	Origin recognition complex subunit 2	0.001358	2,3,5	1	72.496	MAKLASELAK	111	S	yes
Q13425	Beta-2-syntrophin (59 kDa dystrophin-associated protein A1 basic component 2) (Syntrophin-3) (SNT3) (Syntrophin-like) (SNTL)	1.292	2	1	98.407	NLSMPDLENR	258	S	yes
Q13427	Peptidyl-prolyl cis-trans isomerase G (PPIase G) (Peptidyl-prolyl isomerase G) (EC 5.2.1.8) (CASP10) (Clk-associating RS-cyclophilin) (CARS-Cyp) (CARS-cyclophilin) (SR-cyclophilin) (SR-cyp) (SRcyp) (Cyclophilin G) (Rotamase G)	1.9939	2	0.999987	89.827	ENSESEKR	658	S	yes
Q13427	Peptidyl-prolyl cis-trans isomerase G (PPIase G) (Peptidyl-prolyl isomerase G) (EC 5.2.1.8) (CASP10) (Clk-associating RS-cyclophilin) (CARS-Cyp) (CARS-cyclophilin) (SR-cyclophilin) (SR-cyp) (SRcyp) (Cyclophilin G) (Rotamase G)	0.036292	2	0.999997	74.165	SKQLESK	525	S	yes
Q13427	Peptidyl-prolyl cis-trans isomerase G (PPIase G) (Peptidyl-prolyl isomerase G) (EC 5.2.1.8) (CASP10) (Clk-associating RS-cyclophilin) (CARS-Cyp) (CARS-cyclophilin) (SR-cyclophilin) (SR-cyp) (SRcyp) (Cyclophilin G) (Rotamase G)	1.486	3	0.830141	43.419	EKSKQLESK	525	S	yes
Q13459	Unconventional myosin-IXb (Unconventional myosin-9b)	0.22818	3	0.999893	51.276	SLKLIISMTLHDR	798	S	yes
Q13490	Baculoviral IAP repeat-containing protein 2 (EC 2.3.2.27) (Cellular inhibitor of apoptosis 1) (C-IAP1) (IAP homolog B) (Inhibitor of apoptosis protein 2) (hIAP-2) (hIAP2) (RING finger protein 48) (RING-type E3 ubiquitin transferase BIRC2) (TNFR2-TRAF-signaling complex protein 2)	0.18077	3	0.992972	54.368	TNPYSYAMSTEEAR	178	S	yes
Q13490	Baculoviral IAP repeat-containing protein 2 (EC 2.3.2.27) (Cellular inhibitor of apoptosis 1) (C-IAP1) (IAP homolog B) (Inhibitor of apoptosis protein 2) (hIAP-2) (hIAP2) (RING finger protein 48) (RING-type E3 ubiquitin transferase BIRC2) (TNFR2-TRAF-signaling complex protein 2)	5.3302	3	0.998016	52.403	HKTASQR	4	T	yes
Q13492	Phosphatidylinositol-binding clathrin assembly protein (Clathrin assembly lymphoid myeloid leukemia protein)	0.019518	2	0.999949	89.369	DSTAASR	297	S	yes
Q13523	Serine/threonine-protein kinase PRP4 homolog (EC 2.7.11.1) (PRP4 kinase) (PRP4 pre-mRNA-processing factor 4 homolog)	0.69199	3	0.5	45.081	RRLSSPR	411	S	yes
Q13523	Serine/threonine-protein kinase PRP4 homolog (EC 2.7.11.1) (PRP4 kinase) (PRP4 pre-mRNA-processing factor 4 homolog)	0.69199	3	0.5	45.081	RRLSSPR	410	S	yes
Q13535	Serine/threonine-protein kinase ATR (EC 2.7.11.1) (Ataxia telangiectasia and Rad3-related protein) (FRAP-related protein 1)	2.6599	3	0.999873	45.077	SLQYGNQFIYQSMPR	2075	S	yes
Q13535	Serine/threonine-protein kinase ATR (EC 2.7.11.1) (Ataxia telangiectasia and Rad3-related protein) (FRAP-related protein 1)	2.3282	3	0.983909	40.085	QCMLPKSAALSEK	2414	S	yes
Q13625	Apoptosis-stimulating of p53 protein 2 (Bcl2-binding protein) (Bbp) (Renal carcinoma antigen NY-REN-51) (Tumor suppressor p53-binding protein 2) (53BP2) (p53-binding protein 2) (p53BP2)	1.1459	6	0.999366	51.073	MDLTLAELQEMASR	136	S	yes
Q13642	Four and a half LIM domains protein 1 (FHL-1) (Skeletal muscle LIM-protein 1) (SLIM) (SLIM-1)	2.9551	3,4	0.990923	55.676	ILCNKCTTR	93	T	yes
Q13643	Four and a half LIM domains protein 3 (FHL-3) (Skeletal muscle LIM-protein 2) (SLIM-2)	3.9155	2	0.981912	43.316	TLTQGGVTYRDQPWHR	168	T	yes
Q13769	THO complex subunit 5 homolog (Functional spliceosome-associated protein 79) (fSAP79) (NF2/meningioma region protein pK1.3) (Placental protein 39.2) (PP39.2) (hTREX90)	3.1226	3	1	117.03	LMAEIQDLKSR	74	S	yes
Q13769	THO complex subunit 5 homolog (Functional spliceosome-associated protein 79) (fSAP79) (NF2/meningioma region protein pK1.3) (Placental protein 39.2) (PP39.2) (hTREX90)	2.6544	2	0.891731	58.596	SSESSKKR	2	S	yes
Q13769	THO complex subunit 5 homolog (Functional spliceosome-associated protein 79) (fSAP79) (NF2/meningioma region protein pK1.3) (Placental protein 39.2) (PP39.2) (hTREX90)	5.2571	2	0.842363	41.399	MSSESSK	2	S	yes
Q13772	Nuclear receptor coactivator 4 (NCoA-4) (Androgen receptor coactivator 70 kDa protein) (70 kDa AR-activator) (70 kDa androgen receptor coactivator) (Androgen receptor-associated protein of 70 kDa) (Ret-activating protein ELE1)	1.2061	4	1	43.382	HKDSLNMWLCPRK	456	S	yes
Q13813	Spectrin alpha chain, non-erythrocytic 1 (Alpha-II spectrin) (Fodrin alpha chain) (Spectrin, non-erythroid alpha subunit)	1.7046	2	0.999857	87.647	KDETDSKTASPWK	1191	T	yes
Q13813	Spectrin alpha chain, non-erythrocytic 1 (Alpha-II spectrin) (Fodrin alpha chain) (Spectrin, non-erythroid alpha subunit)	1.7046	2	0.999964	87.647	KDETDSKTASPWK	1189	S	yes
Q14004	Cyclin-dependent kinase 13 (EC 2.7.11.22) (EC 2.7.11.23) (CDC2-related protein kinase 5) (Cell division cycle 2-like protein kinase 5) (Cell division protein kinase 13) (hCDK13) (Cholinesterase-related cell division controller)	3.913	3	0.969432	55.353	ASNTSTPTK	490	S	yes
Q14118	Dystroglycan (Dystrophin-associated glycoprotein 1) [Cleaved into: Alpha-dystroglycan (Alpha-DG); Beta-dystroglycan (Beta-DG)]	0.83697	3	1	51.445	PKNMTPYR	884	T	yes
Q14151	Scaffold attachment factor B2 (SAF-B2)	4.9101	3	1	86.014	SKGEPVISVK	577	S	yes
Q14157	Ubiquitin-associated protein 2-like (Protein NICE-4)	0.0085885	3,4	0.999953	99.711	SPAVATSTAAPPPPSSPLPSK	439	S	yes
Q14160	Protein scribble homolog (Scribble) (hScrib) (Protein LAP4)	2.7006	3	0.977977	56.205	VSPTGAAGR	1140	S	yes
Q14160	Protein scribble homolog (Scribble) (hScrib) (Protein LAP4)	2.084	2	0.990375	49.423	ATPHPSELK	475	T	yes
Q14184	Protein scribble homolog (Scribble) (hScrib) (Protein LAP4)	3.7709	3	1	61.78	KLKPNHTK	243	T	yes
Q14185	Dedicator of cytokinesis protein 1 (180 kDa protein downstream of CRK) (DOCK180)	0.42259	3	1	78.964	LLTQFPNAEKMK	1376	T	yes
Q14185	Dedicator of cytokinesis protein 1 (180 kDa protein downstream of CRK) (DOCK180)	0.083854	3	1	47.706	SHLRFTFR	507	S	yes
Q14201	Protein BTG3 (Abundant in neuroepithelium area protein) (BTG family member 3) (Protein Tob5)	5.2786	4	1	63.662	LTLILQEKYK	35	T	yes
Q14202	Zinc finger MYM-type protein 3 (Zinc finger protein 261)	0.63228	2,3	1	74.301	TMRKGQK	1034	T	yes
Q14204	Cytoplasmic dynein 1 heavy chain 1 (Cytoplasmic dynein heavy chain 1) (Dynein heavy chain, cytosolic)	1.2906	2	1	47.062	SIPLDEGEDEAQR	2384	S	yes
Q14232	Translation initiation factor eIF-2B subunit alpha (eIF-2B GDP-GTP exchange factor subunit alpha)	0.96386	2	0.993319	69.01	RISLSRNK	105	S	yes
Q14469	Transcription factor HES-1 (Class B basic helix-loop-helix protein 39) (bHLHb39) (Hairy and enhancer of split 1) (Hairy homolog) (Hairy-like protein) (hHL)	1.8614	2	1	68.016	ADILEMTVK	84	T	yes
Q14469	Transcription factor HES-1 (Class B basic helix-loop-helix protein 39) (bHLHb39) (Hairy and enhancer of split 1) (Hairy homolog) (Hairy-like protein) (hHL)	2.7875	4	0.981291	51.695	RARINESLSQLK	55	S	yes
Q14517	Protocadherin Fat 1 (Cadherin family member 7) (Cadherin-related tumor suppressor homolog) (Protein fat homolog) [Cleaved into: Protocadherin Fat 1, nuclear form]	2.1943	3	0.979363	89.189	STLPTGIQVK	718	S	yes
Q14517	Protocadherin Fat 1 (Cadherin family member 7) (Cadherin-related tumor suppressor homolog) (Protein fat homolog) [Cleaved into: Protocadherin Fat 1, nuclear form]	0.3761	2	0.9084	83.869	TGLITTTSR	1200	S	yes
Q14573	Inositol 1,4,5-trisphosphate receptor type 3 (IP3 receptor isoform 3) (IP3R 3) (InsP3R3) (Type 3 inositol 1,4,5-trisphosphate receptor) (Type 3 InsP3 receptor)	3.1825	3	1	71.614	TLQQMLLK	1668	T	yes
Q14573	Inositol 1,4,5-trisphosphate receptor type 3 (IP3 receptor isoform 3) (IP3R 3) (InsP3R3) (Type 3 inositol 1,4,5-trisphosphate receptor) (Type 3 InsP3 receptor)	0.30715	2	1	54.776	KTLQQMLLKK	1669	T	yes
Q14584	Zinc finger protein 266 (Zinc finger protein HZF1)	2.3775	4	0.908196	48.907	SSQLTEHLKTHTAK	308	S	yes
Q14584	Zinc finger protein 266 (Zinc finger protein HZF1)	1.6684	2	1	42.041	SEKPYKCK	208	S	yes
Q14592	Zinc finger protein 460 (Zinc finger protein 272) (Zinc finger protein HZF8)	1.5812	3	0.999986	96.756	HFSIHTGEK	471;474;478;478	T	yes
Q14651	Plastin-1 (Intestine-specific plastin) (I-plastin)	5.0493	3	1	52.599	QEMIRRENLSDEDK	576	S	yes
Q14671	Pumilio homolog 1 (HsPUM) (Pumilio-1)	0.039287	3	0.865177	105.17	SASSASSLFSPSSTLFSSSR	799	S	yes
Q14671	Pumilio homolog 1 (HsPUM) (Pumilio-1)	0.039287	3	0.482101	64.588	SASSASSLFSPSSTLFSSSR	797	S	yes
Q14678	KN motif and ankyrin repeat domain-containing protein 1 (Ankyrin repeat domain-containing protein 15) (Kidney ankyrin repeat-containing protein)	0.44982	4	1	81.191	QELQAAGSRK	497	S	yes
Q14678	KN motif and ankyrin repeat domain-containing protein 1 (Ankyrin repeat domain-containing protein 15) (Kidney ankyrin repeat-containing protein)	0.85554	3	0.999997	74.841	ATMAQPLVFSK	505	T	yes
Q14678	KN motif and ankyrin repeat domain-containing protein 1 (Ankyrin repeat domain-containing protein 15) (Kidney ankyrin repeat-containing protein)	0.37785	3	0.745198	54.09	KQTSTQTVETR	709	T	yes
Q14680	Maternal embryonic leucine zipper kinase (hMELK) (EC 2.7.11.1) (Protein kinase Eg3) (pEg3 kinase) (Protein kinase PK38) (hPK38) (Tyrosine-protein kinase MELK) (EC 2.7.10.2)	0.85567	2	0.879405	69.864	NTLGSDLPRIK	49	S	yes
Q14683	Structural maintenance of chromosomes protein 1A (SMC protein 1A) (SMC-1-alpha) (SMC-1A) (Sb1.8)	4.2359	2	0.976162	59.418	YSQSDLEQTKTR	722	T	yes
Q14684	Ribosomal RNA processing protein 1 homolog B (RRP1-like protein B)	0.024732	3	0.867417	139.21	TPTSSPASSPLVAK	730	T	yes
Q14684	Ribosomal RNA processing protein 1 homolog B (RRP1-like protein B)	0.031837	3	0.80983	86.772	TPTSSPASSPLVAK	731	S	yes
Q14692	Ribosome biogenesis protein BMS1 homolog (Ribosome assembly protein BMS1 homolog)	2.1729	3	1	94.409	PKTQAKAGK	1182	T	yes
Q14781	Chromobox protein homolog 2	3.3552	4	0.999972	84.821	LKEPDAPSKSK	104	S	yes
Q14807	Kinesin-like protein KIF22 (Kinesin-like DNA-binding protein) (Kinesin-like protein 4)	4.1974	2,3	0.975704	86.699	LSSMDPAMLER	433	S	yes
Q14938	Nuclear factor 1 X-type (NF1-X) (Nuclear factor 1/X) (CCAAT-box-binding transcription factor) (CTF) (Nuclear factor I/X) (NF-I/X) (NFI-X) (TGGCA-binding protein)	4.5107	3	1	41.621	KPPCCVLSNPDQKGK	106	S	yes
Q14995	Nuclear receptor subfamily 1 group D member 2 (Orphan nuclear hormone receptor BD73) (Rev-erb alpha-related receptor) (RVR) (Rev-erb-beta) (V-erbA-related protein 1-related) (EAR-1R)	2.6933	2	1	72.34	FSGMVLLCK	97	S	yes
Q14995	Nuclear receptor subfamily 1 group D member 2 (Orphan nuclear hormone receptor BD73) (Rev-erb alpha-related receptor) (RVR) (Rev-erb-beta) (V-erbA-related protein 1-related) (EAR-1R)	0.77284	3	0.999915	49.423	KCLSVGMSR	170	S	yes
Q14997	Nuclear receptor subfamily 1 group D member 2 (Orphan nuclear hormone receptor BD73) (Rev-erb alpha-related receptor) (RVR) (Rev-erb-beta) (V-erbA-related protein 1-related) (EAR-1R)	1.5946	2	0.999999	74.165	TLVKSCR	179	S	yes
Q14BN4	Sarcolemmal membrane-associated protein (Sarcolemmal-associated protein)	5.888	2	0.98106	42.209	DSADLKTLLSK	733	S	yes
Q14CM0	FERM and PDZ domain-containing protein 4 (PDZ domain-containing protein 10) (PSD-95-interacting regulator of spine morphogenesis) (Preso)	4.8771	2	1	68.44	SIFNMANKK	521	S	yes
Q14CM0	FERM and PDZ domain-containing protein 4 (PDZ domain-containing protein 10) (PSD-95-interacting regulator of spine morphogenesis) (Preso)	5.7422	3	0.998313	62.799	SAFISAAKK	160	S	yes
Q15014	Mortality factor 4-like protein 2 (MORF-related gene X protein) (Protein MSL3-2) (Transcription factor-like protein MRGX)	2.7751	3	1	59.908	KQGSQPR	8	S	yes
Q15032	R3H domain-containing protein 1	1.8005	2	0.987516	83.869	SVIVNKTSNTR	229	S	yes
Q15036	Sorting nexin-17	1.5367	3	0.497825	66.92	LSSKLSAVSLR	433	S	yes
Q15036	Sorting nexin-17	1.5367	3	0.497825	66.92	LSSKLSAVSLR	434	S	yes
Q15048	Leucine-rich repeat-containing protein 14	3.3228	2	0.94099	45.084	ELSMGSSLLSGR	290	S	yes
Q15056	Eukaryotic translation initiation factor 4H (eIF-4H) (Williams-Beuren syndrome chromosomal region 1 protein)	0.31788	2	0.99858	58.63	GMGSSRESR	140	S	yes
Q15056	Eukaryotic translation initiation factor 4H (eIF-4H) (Williams-Beuren syndrome chromosomal region 1 protein)	0.31788	2	0.99858	58.63	KGMGSSR	141	S	yes
Q15058	Kinesin-like protein KIF14	4.1414	4	0.999698	79.771	SDMSECENDDPLLRSAGK	42	S	yes
Q15075	Early endosome antigen 1 (Endosome-associated protein p162) (Zinc finger FYVE domain-containing protein 2)	4.3887	3	1	84.916	ENISLLEKER	540	S	yes
Q15075	Early endosome antigen 1 (Endosome-associated protein p162) (Zinc finger FYVE domain-containing protein 2)	3.5719	2	1	43.124	ENISLLEK	540	S	yes
Q15075	Early endosome antigen 1 (Endosome-associated protein p162) (Zinc finger FYVE domain-containing protein 2)	2.604	3	1	42.123	TELLQRPGIEDVAVLK	212	T	yes
Q15111	Inactive phospholipase C-like protein 1 (PLC-L1) (Phospholipase C-deleted in lung carcinoma) (Phospholipase C-related but catalytically inactive protein) (PRIP)	0.43884	3	0.999518	55.213	KTVSFSSMPSEKK	101	S	yes
Q15111	Inactive phospholipase C-like protein 1 (PLC-L1) (Phospholipase C-deleted in lung carcinoma) (Phospholipase C-related but catalytically inactive protein) (PRIP)	5.107	3	0.869736	55.064	KTVSFSSMPSEK	98	S	yes
Q15118	[Pyruvate dehydrogenase (acetyl-transferring)] kinase isozyme 1, mitochondrial (EC 2.7.11.2) (Pyruvate dehydrogenase kinase isoform 1) (PDH kinase 1)	1.4751	3	0.641895	70.028	TSFMFLR	75	S	yes
Q15149	Plectin (PCN) (PLTN) (Hemidesmosomal protein 1) (HD1) (Plectin-1)	1.0619	3	1	47.844	SLSAIYLEKLK	1216	S	yes
Q15149	Plectin (PCN) (PLTN) (Hemidesmosomal protein 1) (HD1) (Plectin-1)	1.0619	3	1	47.844	SLSAIYLEKLK	1218	S	yes
Q15269	Periodic tryptophan protein 2 homolog	1.6604	2	0.988803	46.457	SDTLPLATR	54	T	yes
Q15269	Periodic tryptophan protein 2 homolog	4.9301	3	0.919783	44.468	ETLALTSDALAVTFR	543	T	yes
Q15306	Interferon regulatory factor 4 (IRF-4) (Lymphocyte-specific interferon regulatory factor) (LSIRF) (Multiple myeloma oncogene 1) (NF-EM5)	0.59939	3	1	76.522	NIEKLLSHLER	309	S	yes
Q15386	Ubiquitin-protein ligase E3C (EC 2.3.2.26) (HECT-type ubiquitin transferase E3C) (HectH2)	0.43435	4	1	43.316	RLKNAIIIQSFIR	54	S	yes
Q15397	Pumilio homolog 3 (HBV X-transactivated gene 5 protein) (HBV XAg-transactivated protein 5) (Minor histocompatibility antigen HA-8) (HLA-HA8)	3.8615	3	0.499932	80.706	STKTAQEK	14	S	yes
Q15397	Pumilio homolog 3 (HBV X-transactivated gene 5 protein) (HBV XAg-transactivated protein 5) (Minor histocompatibility antigen HA-8) (HLA-HA8)	3.8615	3	0.499932	80.706	STKTAQEK	13	T	yes
Q15397	Pumilio homolog 3 (HBV X-transactivated gene 5 protein) (HBV XAg-transactivated protein 5) (Minor histocompatibility antigen HA-8) (HLA-HA8)	2.1186	2	0.919233	63.076	QFTGKSTK	13	S	yes
Q15397	Pumilio homolog 3 (HBV X-transactivated gene 5 protein) (HBV XAg-transactivated protein 5) (Minor histocompatibility antigen HA-8) (HLA-HA8)	5.2968	2	0.661605	40.693	QFTGKSTKTAQEK	13	S	yes
Q15398	Disks large-associated protein 5 (DAP-5) (Discs large homolog 7) (Disks large-associated protein DLG7) (Hepatoma up-regulated protein) (HURP)	5.2846	2	0.873749	72.096	KAIPSSVR	148	S	yes
Q15398	Disks large-associated protein 5 (DAP-5) (Discs large homolog 7) (Disks large-associated protein DLG7) (Hepatoma up-regulated protein) (HURP)	1.3806	3	0.999999	60.301	SKAKDQMEQTK	164	T	yes
Q15415	RNA-binding motif protein, Y chromosome, family 1 member F/J (Y chromosome RNA recognition motif 2)	3.1014	3	0.985302	41.689	NRSPSGSLR	104	S	yes
Q15418	Ribosomal protein S6 kinase alpha-1 (S6K-alpha-1) (EC 2.7.11.1) (90 kDa ribosomal protein S6 kinase 1) (p90-RSK 1) (p90RSK1) (p90S6K) (MAP kinase-activated protein kinase 1a) (MAPK-activated protein kinase 1a) (MAPKAP kinase 1a) (MAPKAPK-1a) (Ribosomal S6 kinase 1) (RSK-1)	1.8598	2	0.913123	82.417	ETMTLILK	272	T	yes
Q15418	Ribosomal protein S6 kinase alpha-1 (S6K-alpha-1) (EC 2.7.11.1) (90 kDa ribosomal protein S6 kinase 1) (p90-RSK 1) (p90RSK1) (p90S6K) (MAP kinase-activated protein kinase 1a) (MAPK-activated protein kinase 1a) (MAPKAP kinase 1a) (MAPKAPK-1a) (Ribosomal S6 kinase 1) (RSK-1)	4.0289	2	0.898031	41.383	KETMTLILK	272	T	yes
Q15431	Synaptonemal complex protein 1 (SCP-1) (Cancer/testis antigen 8) (CT8)	4.7459	4	0.5	66.595	KWKVSTEAELR	122	S	yes
Q15431	Synaptonemal complex protein 1 (SCP-1) (Cancer/testis antigen 8) (CT8)	4.7459	4	0.5	66.595	KWKVSTEAELR	123	T	yes
Q15528	Mediator of RNA polymerase II transcription subunit 22 (Mediator complex subunit 22) (Surfeit locus protein 5) (Surf-5)	1.7418	3	0.999972	61.532	TAKIEDETQVSR	39	T	yes
Q15528	Mediator of RNA polymerase II transcription subunit 22 (Mediator complex subunit 22) (Surfeit locus protein 5) (Surf-5)	0.00081201	3	0.999996	57.598	SIMDNFTEIIK	28	S	yes
Q15572	TATA box-binding protein-associated factor RNA polymerase I subunit C (RNA polymerase I-specific TBP-associated factor 110 kDa) (TAFI110) (TATA box-binding protein-associated factor 1C) (TBP-associated factor 1C) (Transcription initiation factor SL1/TIF-IB subunit C)	1.0431	3	0.917735	63.727	LEGAGSRTK	139	T	yes
Q15645	Pachytene checkpoint protein 2 homolog (Human papillomavirus type 16 E1 protein-binding protein) (16E1-BP) (HPV16 E1 protein-binding protein) (Thyroid hormone receptor interactor 13) (Thyroid receptor-interacting protein 13) (TR-interacting protein 13) (TRIP-13)	0.18467	3	0.316496	45.704	SHLLDYVMTTLLFSDKNVNSNLITWNR	155	T	yes
Q15645	Pachytene checkpoint protein 2 homolog (Human papillomavirus type 16 E1 protein-binding protein) (16E1-BP) (HPV16 E1 protein-binding protein) (Thyroid hormone receptor interactor 13) (Thyroid receptor-interacting protein 13) (TR-interacting protein 13) (TRIP-13)	0.18467	3	0.316496	45.704	SHLLDYVMTTLLFSDKNVNSNLITWNR	156	T	yes
Q15648	Mediator of RNA polymerase II transcription subunit 1 (Activator-recruited cofactor 205 kDa component) (ARC205) (Mediator complex subunit 1) (Peroxisome proliferator-activated receptor-binding protein) (PBP) (PPAR-binding protein) (Thyroid hormone receptor-associated protein complex 220 kDa component) (Trap220) (Thyroid receptor-interacting protein 2) (TR-interacting protein 2) (TRIP-2) (Vitamin …	2.2945	3,4	0.999851	91.712	MEICSGSNKTKK	682	S	yes
Q15648	Mediator of RNA polymerase II transcription subunit 1 (Activator-recruited cofactor 205 kDa component) (ARC205) (Mediator complex subunit 1) (Peroxisome proliferator-activated receptor-binding protein) (PBP) (PPAR-binding protein) (Thyroid hormone receptor-associated protein complex 220 kDa component) (Trap220) (Thyroid receptor-interacting protein 2) (TR-interacting protein 2) (TRIP-2) (Vitamin …	1.1957	2,3	0.895833	72.879	SPSHSSSNR	1027	S	yes
Q15648	Mediator of RNA polymerase II transcription subunit 1 (Activator-recruited cofactor 205 kDa component) (ARC205) (Mediator complex subunit 1) (Peroxisome proliferator-activated receptor-binding protein) (PBP) (PPAR-binding protein) (Thyroid hormone receptor-associated protein complex 220 kDa component) (Trap220) (Thyroid receptor-interacting protein 2) (TR-interacting protein 2) (TRIP-2) (Vitamin …	3.3472	3	0.999928	45.723	HESVGHGEDFSK	596	S	yes
Q15652	Probable JmjC domain-containing histone demethylation protein 2C (EC 1.14.11.-) (Jumonji domain-containing protein 1C) (Thyroid receptor-interacting protein 8) (TR-interacting protein 8) (TRIP-8)	0.99681	3	1	110.63	TALSWVK	1822	T	yes
Q15652	Probable JmjC domain-containing histone demethylation protein 2C (EC 1.14.11.-) (Jumonji domain-containing protein 1C) (Thyroid receptor-interacting protein 8) (TR-interacting protein 8) (TRIP-8)	1.9589	3	0.497884	86.699	DLLTTTAGKLR	2072	T	yes
Q15652	Probable JmjC domain-containing histone demethylation protein 2C (EC 1.14.11.-) (Jumonji domain-containing protein 1C) (Thyroid receptor-interacting protein 8) (TR-interacting protein 8) (TRIP-8)	1.9589	3	0.497884	86.699	DLLTTTAGKLR	2073	T	yes
Q15652	Probable JmjC domain-containing histone demethylation protein 2C (EC 1.14.11.-) (Jumonji domain-containing protein 1C) (Thyroid receptor-interacting protein 8) (TR-interacting protein 8) (TRIP-8)	0.91089	3	1	64.73	LAEAGETGR	1351	T	yes
Q15833	Syntaxin-binding protein 2 (Protein unc-18 homolog 2) (Unc18-2) (Protein unc-18 homolog B) (Unc-18B)	3.2665	4	0.999874	55.213	KVTELLRTFCESK	304	T	yes
Q16181	Septin-7 (CDC10 protein homolog)	1.2915	3	0.959113	43.604	SVSARSAAAEER	2	S	yes
Q16186	Proteasomal ubiquitin receptor ADRM1 (110 kDa cell membrane glycoprotein) (Gp110) (Adhesion-regulating molecule 1) (ARM-1) (Proteasome regulatory particle non-ATPase 13) (hRpn13) (Rpn13 homolog)	0.00016015	3	0.999919	84.734	SQSAAVTPSSTTSSTR	211	S	yes
Q16186	Proteasomal ubiquitin receptor ADRM1 (110 kDa cell membrane glycoprotein) (Gp110) (Adhesion-regulating molecule 1) (ARM-1) (Proteasome regulatory particle non-ATPase 13) (hRpn13) (Rpn13 homolog)	0.28747	3	0.499289	63.16	SQSAAVTPSSTTSSTR	213	S	yes
Q16186	Proteasomal ubiquitin receptor ADRM1 (110 kDa cell membrane glycoprotein) (Gp110) (Adhesion-regulating molecule 1) (ARM-1) (Proteasome regulatory particle non-ATPase 13) (hRpn13) (Rpn13 homolog)	0.12954	3	0.818557	62.081	SQSAAVTPSSTTSSTR	221	T	yes
Q16186	Proteasomal ubiquitin receptor ADRM1 (110 kDa cell membrane glycoprotein) (Gp110) (Adhesion-regulating molecule 1) (ARM-1) (Proteasome regulatory particle non-ATPase 13) (hRpn13) (Rpn13 homolog)	3.4033	3	0.410799	43.316	SQSAAVTPSSTTSSTR	211	T	yes
Q16514	Transcription initiation factor TFIID subunit 12 (Transcription initiation factor TFIID 20/15 kDa subunits) (TAFII-20/TAFII-15) (TAFII20/TAFII15)	0.30329	3	1	80.905	LSPENNQVLTK	51	S	yes
Q16514	Transcription initiation factor TFIID subunit 12 (Transcription initiation factor TFIID 20/15 kDa subunits) (TAFII-20/TAFII-15) (TAFII20/TAFII15)	1.2361	2	0.999681	66.595	LSPENNQVLTK	59	T	yes
Q16594	Transcription initiation factor TFIID subunit 9 (RNA polymerase II TBP-associated factor subunit G) (STAF31/32) (Transcription initiation factor TFIID 31 kDa subunit) (TAFII-31) (TAFII31) (Transcription initiation factor TFIID 32 kDa subunit) (TAFII-32) (TAFII32)	1.2065	3	0.999999	82.543	MESGKTASPK	3	S	yes
Q16594	Transcription initiation factor TFIID subunit 9 (RNA polymerase II TBP-associated factor subunit G) (STAF31/32) (Transcription initiation factor TFIID 31 kDa subunit) (TAFII-31) (TAFII31) (Transcription initiation factor TFIID 32 kDa subunit) (TAFII-32) (TAFII32)	1.8444	3	0.497447	56.339	KASTSAGRITVPR	138	T	yes
Q16760	Diacylglycerol kinase delta (DAG kinase delta) (EC 2.7.1.107) (130 kDa diacylglycerol kinase) (Diglyceride kinase delta) (DGK-delta)	0.56311	2	0.999064	80.014	KVSKSPCEK	681	S	yes
Q17R98	Zinc finger protein 827	1.2594	3	1	128.12	ETQMVKIK	667	T	yes
Q17RB8	LON peptidase N-terminal domain and RING finger protein 1 (RING finger protein 191)	1.0777	2	0.953849	55.196	MSSPAVARTSPGGSR	2	S	yes
Q17RS7	Flap endonuclease GEN homolog 1 (EC 3.1.-.-)	3.2052	3	1	45.081	KSVCLDR	794	S	yes
Q2KHR3	Glutamine and serine-rich protein 1	0.27302	3	0.499338	76.282	TSQGTVPTALAFER	105	T	yes
Q2KHR3	Glutamine and serine-rich protein 1	0.27302	3	0.499338	76.282	TSQGTVPTALAFER	104	S	yes
Q2TAC2	Coiled-coil domain-containing protein 57	0.12727	2	1	45.915	EAGAKAAESLQR	227	S	yes
Q2V2M9	FH1/FH2 domain-containing protein 3 (Formactin-2) (Formin homolog overexpressed in spleen 2) (hFHOS2)	2.6579	3	0.999657	70.256	ELRSRSVSR	500	S	yes
Q2WGJ6	Kelch-like protein 38	0.097136	3	0.5	73.881	DHDFSSDLLR	17	S	yes
Q2WGJ6	Kelch-like protein 38	0.097136	3	0.5	73.881	DHDFSSDLLR	18	S	yes
Q32M84	BTB/POZ domain-containing protein 16	2.6124	3	0.989388	54.416	IMSNTHKAR	4	S	yes
Q3KP66	Innate immunity activator protein	2.8765	3	0.999997	72.705	GLSKAAVSEELK	581	S	yes
Q3L8U1	Chromodomain-helicase-DNA-binding protein 9 (CHD-9) (EC 3.6.4.12) (ATP-dependent helicase CHD9) (Chromatin-related mesenchymal modulator) (CReMM) (Chromatin-remodeling factor CHROM1) (Kismet homolog 2) (PPAR-alpha-interacting complex protein 320 kDa) (Peroxisomal proliferator-activated receptor A-interacting complex 320 kDa protein)	2.3881	3	1	45.598	TECFRVEK	1493	T	yes
Q3MII6	TBC1 domain family member 25	2.2521	2	1	80.102	SREYEQLK	262	S	yes
Q3SYG4	Protein PTHB1 (Bardet-Biedl syndrome 9 protein) (Parathyroid hormone-responsive B1 gene protein)	0.18389	4	0.998409	52.79	ITVLASKTSQR	593	S	yes
Q3SYG4	Protein PTHB1 (Bardet-Biedl syndrome 9 protein) (Parathyroid hormone-responsive B1 gene protein)	0.27612	3	0.965704	52.79	ITVLASKTSQR	595	T	yes
Q3V6T2	Girdin (Akt phosphorylation enhancer) (APE) (Coiled-coil domain-containing protein 88A) (G alpha-interacting vesicle-associated protein) (GIV) (Girders of actin filament) (Hook-related protein 1) (HkRP1)	4.6033	2	0.882035	52.365	ENKSLEQETSQLEK	825	S	yes
Q3V6T2	Girdin (Akt phosphorylation enhancer) (APE) (Coiled-coil domain-containing protein 88A) (G alpha-interacting vesicle-associated protein) (GIV) (Girders of actin filament) (Hook-related protein 1) (HkRP1)	2.9519	3	0.940546	46.873	RTSIHDFLTKDSR	1819	T	yes
Q494V2	Cilia- and flagella-associated protein 100 (Coiled-coil domain-containing protein 37)	5.8779	3	1	46.706	FEDTLKHYK	252	T	yes
Q49AA0	Zinc finger protein 69 homolog (Zinc finger protein 642)	1.4627	2	0.98265	74.165	STISQER	162	S	yes
Q49AA0	Zinc finger protein 69 homolog (Zinc finger protein 642)	3.7012	3	0.5	41.227	LDLINHPTSYIR	264	S	yes
Q49AA0	Zinc finger protein 69 homolog (Zinc finger protein 642)	3.7012	3	0.5	41.227	LDLINHPTSYIR	263	T	yes
Q4AC94	C2 domain-containing protein 3	5.1235	4	1	67.08	PPTCVLVRVR	57	T	yes
Q4FZB7	Histone-lysine N-methyltransferase KMT5B (EC 2.1.1.43) (Lysine N-methyltransferase 5B) (Lysine-specific methyltransferase 5B) (Suppressor of variegation 4-20 homolog 1) (Su(var)4-20 homolog 1) (Suv4-20h1)	1.7746	3	0.959073	70.68	SRTLTRQSMSR	407	S	yes
Q4G0P3	Hydrocephalus-inducing protein homolog	0.55652	3	0.999701	70.54	AAKFSDTIQK	3246	S	yes
Q4G0X4	BTB/POZ domain-containing protein KCTD21 (KCASH2 protein) (Potassium channel tetramerization domain-containing protein 21)	0.14825	2,3	0.999998	95.483	KSDPITLNVGGK	7	T	yes
Q4KWH8	1-phosphatidylinositol 4,5-bisphosphate phosphodiesterase eta-1 (EC 3.1.4.11) (Phosphoinositide phospholipase C-eta-1) (Phospholipase C-eta-1) (PLC-eta-1) (Phospholipase C-like protein 3) (PLC-L3)	0.30005	2	1	113.66	GVTVKTK	1530	T	yes
Q4KWH8	1-phosphatidylinositol 4,5-bisphosphate phosphodiesterase eta-1 (EC 3.1.4.11) (Phosphoinositide phospholipase C-eta-1) (Phospholipase C-eta-1) (PLC-eta-1) (Phospholipase C-like protein 3) (PLC-L3)	1.2186	4	1	46.318	SLEPIDALTEQLR	1535	S	yes
Q4KWH8	1-phosphatidylinositol 4,5-bisphosphate phosphodiesterase eta-1 (EC 3.1.4.11) (Phosphoinositide phospholipase C-eta-1) (Phospholipase C-eta-1) (PLC-eta-1) (Phospholipase C-like protein 3) (PLC-L3)	1.2186	4	1	46.318	SLEPIDALTEQLR	1543	T	yes
Q4L180	Filamin A-interacting protein 1-like (130 kDa GPBP-interacting protein) (90 kDa GPBP-interacting protein) (Protein down-regulated in ovarian cancer 1) (DOC-1)	3.7689	3	1	70.728	ISDPQVFSK	791	S	yes
Q4V348	Zinc finger protein 658B	3.0452	3	0.881049	43.083	TTLFNHMR	11	T	yes
Q52M58	Putative uncharacterized protein C14orf177	0.27151	2	0.71391	46.892	PMITRPSVSQLGEGK	32	S	yes
Q52M93	Zinc finger protein 585B (zinc finger protein 41-like protein)	4.6634	4	0.989518	62.357	SNLSKHQKTHTGEK	647	S	yes
Q52M93	Zinc finger protein 585B (zinc finger protein 41-like protein)	1.8316	4	0.994314	51.798	SNLITHQKTHTGEK	479	S	yes
Q53GS9	U4/U6.U5 tri-snRNP-associated protein 2 (Inactive ubiquitin-specific peptidase 39) (SAD1 homolog) (U4/U6.U5 tri-snRNP-associated 65 kDa protein) (65K)	4.5398	3	1	56.432	TYKENFLKR	432	T	yes
Q53H54	tRNA wybutosine-synthesizing protein 2 homolog (tRNA-yW-synthesizing protein 2) (EC 2.5.1.114) (tRNA(Phe) (4-demethylwyosine(37)-C(7)) aminocarboxypropyltransferase)	1.2197	3	0.99828	75.213	RGRVSPDGTR	180	S	yes
Q5BJF6	Outer dense fiber protein 2 (Cenexin) (Outer dense fiber of sperm tails protein 2)	1.3131	3	0.859724	94.538	NGVTSLTQKK	22	S	yes
Q5CZC0	Fibrous sheath-interacting protein 2	0.83246	3	0.5	89.46	TRSLKQWALEK	1752	S	yes
Q5CZC0	Fibrous sheath-interacting protein 2	0.83246	3	0.5	89.46	TRSLKQWALEK	1750	T	yes
Q5CZC0	Fibrous sheath-interacting protein 2	3.7632	3	0.499994	82.85	KSISDIPVSK	4888	S	yes
Q5CZC0	Fibrous sheath-interacting protein 2	3.7632	3	0.499994	82.85	KSISDIPVSK	4886	S	yes
Q5CZC0	Fibrous sheath-interacting protein 2	1.8122	2	0.850793	44.691	HCAVKSSSVSPFER	3939	S	yes
Q5FWF5	N-acetyltransferase ESCO1 (EC 2.3.1.-) (CTF7 homolog 1) (Establishment factor-like protein 1) (EFO1p) (hEFO1) (Establishment of cohesion 1 homolog 1) (ECO1 homolog 1) (ESO1 homolog 1)	3.9173	2	1	124.6	SQAKSSSESK	55	S	yes
Q5FWF5	N-acetyltransferase ESCO1 (EC 2.3.1.-) (CTF7 homolog 1) (Establishment factor-like protein 1) (EFO1p) (hEFO1) (Establishment of cohesion 1 homolog 1) (ECO1 homolog 1) (ESO1 homolog 1)	2.8072	2	0.499049	60.398	SKENSSKVTK	12	S	yes
Q5FWF5	N-acetyltransferase ESCO1 (EC 2.3.1.-) (CTF7 homolog 1) (Establishment factor-like protein 1) (EFO1p) (hEFO1) (Establishment of cohesion 1 homolog 1) (ECO1 homolog 1) (ESO1 homolog 1)	2.8072	2	0.499049	60.398	SKENSSKVTK	13	S	yes
Q5FWF6	Zinc finger protein 789	1.7379	3	0.999202	43.282	SLLLGHERILTR	196	T	yes
Q5H9F3	BCL-6 corepressor-like protein 1 (BCoR-L1) (BCoR-like protein 1)	0.028859	3	0.5	42.317	ELILDVVPSSRR	1028	S	yes
Q5H9F3	BCL-6 corepressor-like protein 1 (BCoR-L1) (BCoR-like protein 1)	0.028859	3	0.5	42.317	ELILDVVPSSRR	1029	S	yes
Q5HYC2	Uncharacterized protein KIAA2026	1.7266	2	1	81.784	LLKKELPSK	919	S	yes
Q5HYC2	Uncharacterized protein KIAA2026	0.24818	2	0.499572	74.944	TSQSEAGK	1204	S	yes
Q5HYC2	Uncharacterized protein KIAA2026	0.24818	2	0.499572	74.944	TSQSEAGK	1203	T	yes
Q5HYW2	NHS-like protein 2	0.56394	2	0.49725	50.46	SSLPPTSPMEKFPK	387	S	yes
Q5HYW2	NHS-like protein 2	0.56394	2	0.49725	50.46	SSLPPTSPMEKFPK	388	S	yes
Q5JPB2	Zinc finger protein 831	2.2687	3	1	70.54	ASPHGGKKAR	638	S	yes
Q5JPB2	Zinc finger protein 831	5.305	3	1	64.224	TAAREAMAGKGR	590	T	yes
Q5JPB2	Zinc finger protein 831	2.4646	3	0.789959	45.864	QTLGTLSLGTSSR	1384	S	yes
Q5JR59	Microtubule-associated tumor suppressor candidate 2 (Cardiac zipper protein) (Microtubule plus-end tracking protein TIP150) (Tracking protein of 150 kDa)	0.029006	2,3	0.999925	77.124	KASLPSKDTPK	902	S	yes
Q5JR59	Microtubule-associated tumor suppressor candidate 2 (Cardiac zipper protein) (Microtubule plus-end tracking protein TIP150) (Tracking protein of 150 kDa)	3.5423	3	0.999952	58.079	ASLPSKDTPKGAGR	902	T	yes
Q5JR59	Microtubule-associated tumor suppressor candidate 2 (Cardiac zipper protein) (Microtubule plus-end tracking protein TIP150) (Tracking protein of 150 kDa)	0.90552	3	0.844756	50.791	KASLPSKDTPK	899	T	yes
Q5JRC9	Protein FAM47A	2.8882	2	0.990212	53.981	TGVSHLSPEPPK	206	T	yes
Q5JTH9	RRP12-like protein	4.7097	3	0.976871	50.053	TLGMAISERPDLR	646	T	yes
Q5JWR5	Protein dopey-1	0.88802	5	0.999061	46.797	TAQKTAMQCCLEYVQQFLTR	668	T	yes
Q5KSL6	Diacylglycerol kinase kappa (DAG kinase kappa) (EC 2.7.1.107) (142 kDa diacylglycerol kinase) (Diglyceride kinase kappa) (DGK-kappa)	4.0729	3	1	52.495	SGDHQGIVFLR	500	S	yes
Q5M775	Cytospin-B (Nuclear structure protein 5) (NSP5) (Sperm antigen HCMOGT-1) (Sperm antigen with calponin homology and coiled-coil domains 1)	0.64716	3	1	82.279	EETEEWR	718	T	yes
Q5MNV8	F-box only protein 47	0.2904	3	0.999945	58.132	DISMLSMVSK	65	S	yes
Q5QJ38	Trichohyalin-like protein 1 (Basalin) (Protein S100-A17) (S100 calcium-binding protein A17)	2.7804	3	0.905679	77.318	TSETQEK	359	T	yes
Q5QJ38	Trichohyalin-like protein 1 (Basalin) (Protein S100-A17) (S100 calcium-binding protein A17)	0.0082414	3	1	49.536	QVTKPEK	100	T	yes
Q5S007	Leucine-rich repeat serine/threonine-protein kinase 2 (EC 2.7.11.1) (Dardarin)	4.007	3	0.826308	42.802	LLEISPYMLSGRER	1721	S	yes
Q5SWA1	Protein phosphatase 1 regulatory subunit 15B	0.024111	2	0.999987	107.97	KMEPGTGGSR	9	S	yes
Q5SWW7	Uncharacterized protein C10orf55	4.4687	3	0.996838	67.234	MFLHLDSHSSLER	7	S	yes
Q5T0F9	Coiled-coil and C2 domain-containing protein 1B (Five prime repressor element under dual repression-binding protein 2) (FRE under dual repression-binding protein 2) (Freud-2)	1.7967	3	0.99794	66.965	GLKTLESQLASVR	202	T	yes
Q5T0W9	Protein FAM83B	0.2148	2	0.999989	97.452	SFPLFDNSK	664	S	yes
Q5T160	Probable arginine--tRNA ligase, mitochondrial (EC 6.1.1.19) (Arginyl-tRNA synthetase) (ArgRS)	1.6996	3	1	41.092	DNDHSRPDIQVQAK	57	S	yes
Q5T200	Zinc finger CCCH domain-containing protein 13	2.6247	6	0.921347	52.019	PQESRSLSPSHLTEDRQGR	873	S	yes
Q5T200	Zinc finger CCCH domain-containing protein 13	2.6247	6	0.854296	52.019	PQESRSLSPSHLTEDRQGR	877	S	yes
Q5T4S7	E3 ubiquitin-protein ligase UBR4 (EC 2.3.2.27) (600 kDa retinoblastoma protein-associated factor) (N-recognin-4) (RING-type E3 ubiquitin transferase UBR4) (Retinoblastoma-associated factor of 600 kDa) (RBAF600) (p600) (Zinc finger UBR1-type protein 1)	2.025	2	0.981392	80.916	EAATKSSR	3843	S	yes
Q5T5D7	Zinc finger protein 684	1.334	2	0.999996	67.879	NLISVGCPITK	52	T	yes
Q5T5J6	Transcriptional protein SWT1	4.4779	3	0.497021	63.662	MSSKESCGKK	3	S	yes
Q5T5J6	Transcriptional protein SWT1	4.4779	3	0.497021	63.662	MSSKESCGKK	2	S	yes
Q5T5J6	Transcriptional protein SWT1	0.027055	3	0.960484	51.335	SSKESCGKK	6	S	yes
Q5T5J6	Transcriptional protein SWT1	1.7547	4	0.999054	41.577	LTNAGSKLDHGIKSLSSPK	138	T	yes
Q5T5P2	Sickle tail protein homolog	2.8697	4	1	69.998	ASLPVVR	169	S	yes
Q5T5U3	Rho GTPase-activating protein 21 (Rho GTPase-activating protein 10) (Rho-type GTPase-activating protein 21)	0.40959	3	0.725386	75.574	KGKSTGSLLTPTR	1747	T	yes
Q5T5U3	Rho GTPase-activating protein 21 (Rho GTPase-activating protein 10) (Rho-type GTPase-activating protein 21)	0.43118	2	0.994084	70.54	PTATGTFGVR	1143	T	yes
Q5T5U3	Rho GTPase-activating protein 21 (Rho GTPase-activating protein 10) (Rho-type GTPase-activating protein 21)	1.2565	4	0.465977	45.257	AASQSTTDYNQVVPNR	420	S	yes
Q5T5U3	Rho GTPase-activating protein 21 (Rho GTPase-activating protein 10) (Rho-type GTPase-activating protein 21)	1.2565	4	0.465977	45.257	AASQSTTDYNQVVPNR	421	T	yes
Q5T6F2	Ubiquitin-associated protein 2 (UBAP-2)	0.14102	3	0.443744	70.68	GVSVSSSTTGLPDMTGSVYNK	1004	S	yes
Q5T6F2	Ubiquitin-associated protein 2 (UBAP-2)	0.14102	3	0.443744	70.68	GVSVSSSTTGLPDMTGSVYNK	1006	S	yes
Q5T7N2	LINE-1 type transposase domain-containing protein 1 (ES cell-associated protein 11)	0.91197	3	1	81.625	IDEKRLTPR	756	T	yes
Q5T890	DNA excision repair protein ERCC-6-like 2 (EC 3.6.4.-) (DNA repair and recombination protein RAD26-like)	1.6798	4	0.881908	75.652	KNSTFIPRK	1095	T	yes
Q5T8A7	Protein phosphatase 1 regulatory subunit 26	1.729	3	1	92.925	SCLSKSK	752	S	yes
Q5T8A7	Protein phosphatase 1 regulatory subunit 26	1.729	3	0.998449	92.925	SCLSKSK	755	S	yes
Q5T8A7	Protein phosphatase 1 regulatory subunit 26	1.112	4	0.961382	45.28	GGGHVRPSTPK	605	S	yes
Q5TAP6	U3 small nucleolar RNA-associated protein 14 homolog C	5.4286	2	0.440809	66.595	TSSSLATVK	98	S	yes
Q5TAP6	U3 small nucleolar RNA-associated protein 14 homolog C	5.4286	2	0.440809	66.595	TSSSLATVK	97	S	yes
Q5TB30	DEP domain-containing protein 1A	4.7571	3	0.499045	45.022	SQSLLLRSSTRR	510	S	yes
Q5TB30	DEP domain-containing protein 1A	4.7571	3	0.499045	45.022	SQSLLLRSSTRR	512	S	yes
Q5TC79	Zinc finger and BTB domain-containing protein 37	5.8074	4	0.996535	47.062	ARSESPGRMDEPK	326	S	yes
Q5TCQ9	Membrane-associated guanylate kinase, WW and PDZ domain-containing protein 3 (Membrane-associated guanylate kinase inverted 3) (MAGI-3)	0.9273	3	0.999998	85.862	RGRSVSPK	1248	S	yes
Q5TCQ9	Membrane-associated guanylate kinase, WW and PDZ domain-containing protein 3 (Membrane-associated guanylate kinase inverted 3) (MAGI-3)	0.46746	2	0.999995	76.17	TAKMKTDK	688	T	yes
Q5TCQ9	Membrane-associated guanylate kinase, WW and PDZ domain-containing protein 3 (Membrane-associated guanylate kinase inverted 3) (MAGI-3)	4.2271	3	0.997677	46.001	DQSLSPSKGENK	1280	S	yes
Q5TCQ9	Membrane-associated guanylate kinase, WW and PDZ domain-containing protein 3 (Membrane-associated guanylate kinase inverted 3) (MAGI-3)	2.3936	3	1	40.994	KAPSNAEAK	1327	S	yes
Q5TCS8	Adenylate kinase 9 (AK 9) (EC 2.7.4.4) (EC 2.7.4.6) (Adenylate kinase domain-containing protein 1) (Adenylate kinase domain-containing protein 2)	1.2275	4	0.999986	107.43	LTLSELK	1711	T	yes
Q5TCS8	Adenylate kinase 9 (AK 9) (EC 2.7.4.4) (EC 2.7.4.6) (Adenylate kinase domain-containing protein 1) (Adenylate kinase domain-containing protein 2)	4.4197	3	0.985197	67.214	ETGETFTFKR	541	T	yes
Q5TIA1	Meiosis inhibitor protein 1 (Meiosis defective protein 1)	5.8909	4	0.985019	47.639	DNTLRETMVSAIRK	760	S	yes
Q5TZA2	Rootletin (Ciliary rootlet coiled-coil protein)	0.26178	2	1	61.679	QQALSLK	1065	S	yes
Q5TZA2	Rootletin (Ciliary rootlet coiled-coil protein)	3.882	3	0.999991	52.403	SHEDTVR	1892	S	yes
Q5UIP0	Telomere-associated protein RIF1 (Rap1-interacting factor 1 homolog)	1.0584	3	0.999981	62.107	SEVFPVSK	540	S	yes
Q5VST9	Obscurin (EC 2.7.11.1) (Obscurin-RhoGEF) (Obscurin-myosin light chain kinase) (Obscurin-MLCK)	4.8359	3	0.5	85.909	LPSAPSGGAPIR	6987	S	yes
Q5VST9	Obscurin (EC 2.7.11.1) (Obscurin-RhoGEF) (Obscurin-myosin light chain kinase) (Obscurin-MLCK)	4.8359	3	0.5	85.909	LPSAPSGGAPIR	6990	S	yes
Q5VST9	Obscurin (EC 2.7.11.1) (Obscurin-RhoGEF) (Obscurin-myosin light chain kinase) (Obscurin-MLCK)	1.4324	3	1	53.968	DQPQFSGAPR	7	S	yes
Q5VST9	Obscurin (EC 2.7.11.1) (Obscurin-RhoGEF) (Obscurin-myosin light chain kinase) (Obscurin-MLCK)	0.10865	4	0.496815	53.252	LSSSSKVCMEATGCTRR	931	S	yes
Q5VST9	Obscurin (EC 2.7.11.1) (Obscurin-RhoGEF) (Obscurin-myosin light chain kinase) (Obscurin-MLCK)	0.10865	4	0.496815	53.252	LSSSSKVCMEATGCTRR	932	S	yes
Q5VT06	Centrosome-associated protein 350 (Cep350) (Centrosome-associated protein of 350 kDa)	5.7002	3	1	125.16	TPKKELEDQR	1909	T	yes
Q5VT06	Centrosome-associated protein 350 (Cep350) (Centrosome-associated protein of 350 kDa)	0.32986	3	0.999998	67.563	SKIEDAFSK	2276	S	yes
Q5VT06	Centrosome-associated protein 350 (Cep350) (Centrosome-associated protein of 350 kDa)	3.302	2	0.899816	52.403	GETSFAK	2519	T	yes
Q5VT06	Centrosome-associated protein 350 (Cep350) (Centrosome-associated protein of 350 kDa)	1.1937	3	0.981043	50.292	VKNVPPSEPSATR	652	S	yes
Q5VT06	Centrosome-associated protein 350 (Cep350) (Centrosome-associated protein of 350 kDa)	1.0943	3	1	48.115	EATEQKNKR	622	T	yes
Q5VT52	Regulation of nuclear pre-mRNA domain-containing protein 2	0.060792	3	0.82459	71.286	SFNYSPNSSTSEVSSTSASK	589	S	yes
Q5VT52	Regulation of nuclear pre-mRNA domain-containing protein 2	0.7229	3	0.437602	65.887	SAVSTSVPTKPTENISK	399	S	yes
Q5VT52	Regulation of nuclear pre-mRNA domain-containing protein 2	0.7229	3	0.437602	65.887	SAVSTSVPTKPTENISK	400	T	yes
Q5VT52	Regulation of nuclear pre-mRNA domain-containing protein 2	1.5745	3	0.884594	54.539	IISPGSSTPSSTR	762	S	yes
Q5VT97	Rho GTPase-activating protein SYDE2 (Synapse defective protein 1 homolog 2) (Protein syd-1 homolog 2)	1.6673	3	1	71.451	TVRKLSMK	525	T	yes
Q5VT97	Rho GTPase-activating protein SYDE2 (Synapse defective protein 1 homolog 2) (Protein syd-1 homolog 2)	2.3855	3	0.999071	67.115	PSCSRSLESLR	82	S	yes
Q5VU65	Nuclear pore membrane glycoprotein 210-like (Nucleoporin 210 kDa-like) (Nucleoporin Nup210-like)	0.10397	2	0.5	72.096	LSSIILAR	105	S	yes
Q5VU65	Nuclear pore membrane glycoprotein 210-like (Nucleoporin 210 kDa-like) (Nucleoporin Nup210-like)	0.10397	2	0.5	72.096	LSSIILAR	106	S	yes
Q5VUR7	Ankyrin repeat domain-containing protein 20A3	0.61671	2,3	0.995858	93.667	KASSHAVDR	192	S	yes
Q5VUR7	Ankyrin repeat domain-containing protein 20A3	0.61671	3	0.5	93.667	KASSHAVDR	191	S	yes
Q5VVC0	Uncharacterized protein C1orf146	4.5267	2	1	74.301	AESGKEK	4	S	yes
Q5VWJ9	Sorting nexin-30	3.1928	3	1	47.712	HVTGGYKLR	230	T	yes
Q5VWX1	KH domain-containing, RNA-binding, signal transduction-associated protein 2 (Sam68-like mammalian protein 1) (SLM-1) (hSLM-1)	5.5631	3	1	52.693	KYLDVISNKNIK	54	S	yes
Q5VYK3	Proteasome adapter and scaffold protein ECM29 (Ecm29 proteasome adapter and scaffold) (Proteasome-associated protein ECM29 homolog)	3.7981	5	0.560651	50.053	TSRDSSTEKLLQK	1434	S	yes
Q5VYK3	Proteasome adapter and scaffold protein ECM29 (Ecm29 proteasome adapter and scaffold) (Proteasome-associated protein ECM29 homolog)	3.7981	5	0.65311	50.053	TSRDSSTEKLLQK	1430	T	yes
Q5VYK3	Proteasome adapter and scaffold protein ECM29 (Ecm29 proteasome adapter and scaffold) (Proteasome-associated protein ECM29 homolog)	3.7981	5	0.35216	50.053	TSRDSSTEKLLQK	1436	T	yes
Q5VZE5	N-alpha-acetyltransferase 35, NatC auxiliary subunit (Embryonic growth-associated protein homolog) (Protein MAK10 homolog)	3.4664	4	0.886808	41.996	STRSRQGEER	210	S	yes
Q5VZE5	N-alpha-acetyltransferase 35, NatC auxiliary subunit (Embryonic growth-associated protein homolog) (Protein MAK10 homolog)	3.4664	4	0.993335	41.996	STRSRQGEER	213	S	yes
Q5XPI4	E3 ubiquitin-protein ligase RNF123 (EC 2.3.2.27) (Kip1 ubiquitination-promoting complex protein 1) (RING finger protein 123) (RING-type E3 ubiquitin transferase RNF123)	4.6363	3	0.827092	42.629	EGKESTEMKEETAEER	470	T	yes
Q5XX13	F-box/WD repeat-containing protein 10 (F-box and WD-40 domain-containing protein 10) (Ubiquitin ligase-specificity factor)	2.8559	3	0.998352	54.343	EENSLMEILSK	711	S	yes
Q63HK3	Zinc finger protein with KRAB and SCAN domains 2 (Zinc finger protein 694)	4.2464	3	1	67.93	NSQVYGAVAEWLR	371	S	yes
Q64LD2	WD repeat-containing protein 25	1.6582	3	0.495434	59.185	EGSEFLSSTDASTRDSADR	398	S	yes
Q64LD2	WD repeat-containing protein 25	1.6582	3	0.495434	59.185	EGSEFLSSTDASTRDSADR	399	T	yes
Q66GS9	Centrosomal protein of 135 kDa (Cep135) (Centrosomal protein 4)	2.9512	4	0.437612	48.547	ESTQTTAPHNIVSLMEKEK	557	T	yes
Q66GS9	Centrosomal protein of 135 kDa (Cep135) (Centrosomal protein 4)	2.9512	4	0.437612	48.547	ESTQTTAPHNIVSLMEKEK	558	T	yes
Q66GS9	Centrosomal protein of 135 kDa (Cep135) (Centrosomal protein 4)	0.3572	3	0.999374	44.614	SPDVLSLESR	261	S	yes
Q66K41	Zinc finger protein 385C	3.1748	4	1	83.005	LAGKTPK	322	T	yes
Q66K41	Zinc finger protein 385C	0.76681	2	0.999488	77.74	TPKPSSQHSK	322	T	yes
Q66PJ3	ADP-ribosylation factor-like protein 6-interacting protein 4 (ARL-6-interacting protein 4) (Aip-4) (HSP-975) (HSVI-binding protein) (SR-15) (SRp25) (SR-25) (Splicing factor SRrp37)	3.2848	3	1	74.841	GAMAHVGSRKR	190	S	yes
Q68CP9	AT-rich interactive domain-containing protein 2 (ARID domain-containing protein 2) (BRG1-associated factor 200) (BAF200) (Zinc finger protein with activation potential) (Zipzap/p200)	0.28628	3	0.25	78.615	QPTVGGTSSTPR	1724	S	yes
Q68CP9	AT-rich interactive domain-containing protein 2 (ARID domain-containing protein 2) (BRG1-associated factor 200) (BAF200) (Zinc finger protein with activation potential) (Zipzap/p200)	0.28628	3	0.25	78.615	QPTVGGTSSTPR	1725	S	yes
Q68CP9	AT-rich interactive domain-containing protein 2 (ARID domain-containing protein 2) (BRG1-associated factor 200) (BAF200) (Zinc finger protein with activation potential) (Zipzap/p200)	0.28628	3	0.25	78.615	QPTVGGTSSTPR	1723	T	yes
Q68CP9	AT-rich interactive domain-containing protein 2 (ARID domain-containing protein 2) (BRG1-associated factor 200) (BAF200) (Zinc finger protein with activation potential) (Zipzap/p200)	0.28628	3	0.25	78.615	QPTVGGTSSTPR	1726	T	yes
Q68CP9	AT-rich interactive domain-containing protein 2 (ARID domain-containing protein 2) (BRG1-associated factor 200) (BAF200) (Zinc finger protein with activation potential) (Zipzap/p200)	5.5644	3	0.981947	66.989	STNGTAECKTVK	1505	S	yes
Q68CP9	AT-rich interactive domain-containing protein 2 (ARID domain-containing protein 2) (BRG1-associated factor 200) (BAF200) (Zinc finger protein with activation potential) (Zipzap/p200)	0.065315	3	0.957071	51.695	VSHSPALSSDVR	1501	S	yes
Q68DK7	Male-specific lethal 1 homolog (MSL-1) (Male-specific lethal 1-like 1) (MSL1-like 1) (Male-specific lethal-1 homolog 1)	2.8898	3	1	117.52	KSERDTLLAR	252	S	yes
Q68DK7	Male-specific lethal 1 homolog (MSL-1) (Male-specific lethal 1-like 1) (MSL1-like 1) (Male-specific lethal-1 homolog 1)	0.49129	2	0.99051	40.515	SPLGGGGGSGASSQAACLK	205	S	yes
Q68DN1	Uncharacterized protein C2orf16	0.57419	2	0.998558	104.06	ISESQHSLK	1066	S	yes
Q68DQ2	Very large A-kinase anchor protein (vlAKAP) (Beta/gamma crystallin domain-containing protein 3)	0.72464	3	1	103.97	NTPLAMSDVGK	1520	S	yes
Q68J44	Dual specificity phosphatase DUPD1 (EC 3.1.3.16) (EC 3.1.3.48) (Dual specificity phosphatase 27)	0.68951	3	0.97833	53.001	NAYSSAKRLSPK	16	S	yes
Q69YQ0	Cytospin-A (Renal carcinoma antigen NY-REN-22) (Sperm antigen with calponin homology and coiled-coil domains 1-like) (SPECC1-like protein)	1.2305	2	1	58.071	LNALGFSLEQR	277	S	yes
Q6BDI9	Rab15 effector protein	2.599	2	0.496319	45.257	GVDEWLTTTK	78	T	yes
Q6BDI9	Rab15 effector protein	2.599	2	0.496319	45.257	GVDEWLTTTK	77	T	yes
Q6F5E8	Capping protein, Arp2/3 and myosin-I linker protein 2 (Capping protein regulator and myosin 1 linker 2) (F-actin-uncapping protein RLTPR) (Leucine-rich repeat-containing protein 16C) (RGD, leucine-rich repeat, tropomodulin and proline-rich-containing protein)	0.53737	3	0.994144	48.112	GPRTDLETSPGAAPR	1115	T	yes
Q6ICG6	Uncharacterized protein KIAA0930	5.8227	2	0.997343	82.85	PAFFSPSLKR	304	S	yes
Q6IMN6	Caprin-2 (C1q domain-containing protein 1) (Cytoplasmic activation/proliferation-associated protein 2) (Gastric cancer multidrug resistance-associated protein) (Protein EEG-1) (RNA granule protein 140)	5.8571	3	0.852416	74.611	SKPSPSQWK	468	S	yes
Q6IMN6	Caprin-2 (C1q domain-containing protein 1) (Cytoplasmic activation/proliferation-associated protein 2) (Gastric cancer multidrug resistance-associated protein) (Protein EEG-1) (RNA granule protein 140)	3.002	3	1	54.004	EKEVPLEEEMLIQSEK	338	S	yes
Q6IQ16	Speckle-type POZ protein-like (HIB homolog 2) (Roadkill homolog 2)	4.7781	3	1	42.869	FSLLNAK	105	S	yes
Q6IS14	Eukaryotic translation initiation factor 5A-1-like (eIF-5A-1-like) (eIF-5A1-like) (Eukaryotic initiation factor 5A isoform 1-like)	1.0622	3	0.866346	46.352	IVEMSASKTGK	44	S	yes
Q6N021	Methylcytosine dioxygenase TET2 (EC 1.14.11.n2)	4.2915	2	0.948118	87.913	LSSLENSSNK	1481	S	yes
Q6N021	Methylcytosine dioxygenase TET2 (EC 1.14.11.n2)	0.32636	2,3	0.756782	50.353	LSSLENSSNK	1486	S	yes
Q6N021	Methylcytosine dioxygenase TET2 (EC 1.14.11.n2)	0.26784	2	0.795198	41.825	LSSLENSSNK	1480	S	yes
Q6N022	Teneurin-4 (Ten-4) (Protein Odd Oz/ten-m homolog 4) (Tenascin-M4) (Ten-m4) (Teneurin transmembrane protein 4)	0.50814	3	0.971368	66.663	LWGRSTRSGR	138	S	yes
Q6N069	N-alpha-acetyltransferase 16, NatA auxiliary subunit (NMDA receptor-regulated 1-like protein) (NARG1-like protein)	2.6477	3	1	51.927	ANMIKEAEEMCSK	466	S	yes
Q6NSI4	RPA-related protein RADX (RPA-related and RAD51-antagonist, X-chromosome)	0.19869	3	0.5	82.925	IISLSHLEMTWTNR	220	S	yes
Q6NSI4	RPA-related protein RADX (RPA-related and RAD51-antagonist, X-chromosome)	0.19869	3	0.5	82.925	IISLSHLEMTWTNR	222	S	yes
Q6NV74	Uncharacterized protein KIAA1211-like	4.671	2	0.838567	54.772	LRSTSLSLK	692	S	yes
Q6NX49	Zinc finger protein 544	1.9476	2	0.999671	52.725	THTGEKP	375	T	yes
Q6NZI2	Caveolae-associated protein 1 (Cavin-1) (Polymerase I and transcript release factor)	0.32211	2	1	80.438	MEKTKVR	244	T	yes
Q6P050	F-box and leucine-rich protein 22	1.2736	2	0.999291	62.891	SAFQRSICSR	94	S	yes
Q6P050	F-box and leucine-rich protein 22	1.0467	3	0.871156	52.725	SGVTGAR	161	S	yes
Q6P1J9	Parafibromin (Cell division cycle protein 73 homolog) (Hyperparathyroidism 2 protein)	4.597	3	0.917732	63.727	DQMQPGGTAISVTVPYR	420	S	yes
Q6P3R8	Serine/threonine-protein kinase Nek5 (EC 2.7.11.1) (Never in mitosis A-related kinase 5) (NimA-related protein kinase 5)	1.1559	2	1	59.198	ESKNPEQKYK	566	S	yes
Q6P5Q4	Leiomodin-2 (Cardiac leiomodin) (C-LMOD) (Leiomodin)	0.96941	2	0.983306	48.188	SMTSILTR	349	T	yes
Q6P5Z2	Serine/threonine-protein kinase N3 (EC 2.7.11.13) (Protein kinase PKN-beta) (Protein-kinase C-related kinase 3)	2.3503	3	0.998902	94.767	NVVKLLSSR	205	S	yes
Q6PCT2	F-box/LRR-repeat protein 19 (F-box and leucine-rich repeat protein 19)	2.4068	3	0.851367	62.684	GMKVPGKGESGPSALLTPPMSSSSR	23	S	yes
Q6PCT2	F-box/LRR-repeat protein 19 (F-box and leucine-rich repeat protein 19)	0.8042	3	1	56.359	DSGEGPGRR	158	S	yes
Q6PF06	tRNA methyltransferase 10 homolog B (EC 2.1.1.221) (RNA (guanine-9-)-methyltransferase domain-containing protein 3) (tRNA (guanine(9)-N(1))-methyltransferase TRMT10B)	1.1094	3	1	96.745	ELSRLAGQIR	143	S	yes
Q6PJG6	BRCA1-associated ATM activator 1 (BRCA1-associated protein required for ATM activation protein 1)	0.16096	3	1	60.828	KSLDLEGLR	779	S	yes
Q6PKG0	La-related protein 1 (La ribonucleoprotein domain family member 1)	3.1792	3	1	86.699	EGRTLDAKMPR	809	T	yes
Q6Q759	Sperm-associated antigen 17 (Projection protein PF6 homolog)	3.2962	3	0.856888	77.379	SSSVPSLPK	1969	S	yes
Q6R327	Rapamycin-insensitive companion of mTOR (AVO3 homolog) (hAVO3)	1.9428	3	0.964337	78.902	GGKLSSESKTSNR	1121	S	yes
Q6TGC4	Protein-arginine deiminase type-6 (EC 3.5.3.15) (Peptidyl arginine deiminase-like protein) (Peptidylarginine deiminase VI) (hPADVI) (Protein-arginine deiminase type VI)	1.3667	3	1	110.12	MVSVEGR	3	S	yes
Q6UB35	Monofunctional C1-tetrahydrofolate synthase, mitochondrial (EC 6.3.4.3) (Formyltetrahydrofolate synthetase)	0.80248	2	0.998722	87.001	KITIGQGNTEK	588	T	yes
Q6UB35	Monofunctional C1-tetrahydrofolate synthase, mitochondrial (EC 6.3.4.3) (Formyltetrahydrofolate synthetase)	4.8372	2	1	63.184	MVVASDK	636	S	yes
Q6UB98	Ankyrin repeat domain-containing protein 12 (Ankyrin repeat-containing cofactor 2) (GAC-1 protein)	5.2337	2	0.920479	50.791	IASYSKTPK	36	S	yes
Q6UB99	Ankyrin repeat domain-containing protein 11 (Ankyrin repeat-containing cofactor 1)	4.3359	3	0.946761	83.869	TIELFSTEK	1425	T	yes
Q6UB99	Ankyrin repeat domain-containing protein 11 (Ankyrin repeat-containing cofactor 1)	1.9194	3	0.863668	46.318	DSDTEKQGPER	75	T	yes
Q6UN15	Pre-mRNA 3'-end-processing factor FIP1 (hFip1) (FIP1-like 1 protein) (Factor interacting with PAP) (Rearranged in hypereosinophilia)	1.9642	2,3	0.994967	72.2	ETALPSTK	253	T	yes
Q6UN15	Pre-mRNA 3'-end-processing factor FIP1 (hFip1) (FIP1-like 1 protein) (Factor interacting with PAP) (Rearranged in hypereosinophilia)	2.3843	2	0.499999	72.2	ETALPSTK	252	S	yes
Q6UWM9	UDP-glucuronosyltransferase 2A3 (UDPGT 2A3) (EC 2.4.1.17)	2.3588	2,3	0.892214	107.11	TMTSEDLLR	417	T	yes
Q6UWM9	UDP-glucuronosyltransferase 2A3 (UDPGT 2A3) (EC 2.4.1.17)	1.9928	2,3	0.892214	107.11	TMTSEDLLR	420	S	yes
Q6UWM9	UDP-glucuronosyltransferase 2A3 (UDPGT 2A3) (EC 2.4.1.17)	4.2412	3	0.986132	98.898	TMTSEDLLR	417	T	yes
Q6UXY1	Brain-specific angiogenesis inhibitor 1-associated protein 2-like protein 2 (BAI1-associated protein 2-like protein 2) (Planar intestinal- and kidney-specific BAR domain protein) (Pinkbar)	5.7622	3	0.999985	77.185	KGTNPFATVK	508	T	yes
Q6UXY1	Brain-specific angiogenesis inhibitor 1-associated protein 2-like protein 2 (BAI1-associated protein 2-like protein 2) (Planar intestinal- and kidney-specific BAR domain protein) (Pinkbar)	5.754	2	0.944917	47.039	GTNPFATVK	512	T	yes
Q6WCQ1	Myosin phosphatase Rho-interacting protein (M-RIP) (Rho-interacting protein 3) (RIP3) (p116Rip)	0.91638	2,3,4	0.977408	112.3	QEISSLKDELQTALR	921	S	yes
Q6WCQ1	Myosin phosphatase Rho-interacting protein (M-RIP) (Rho-interacting protein 3) (RIP3) (p116Rip)	1.1745	2,4	0.5	68.173	QEISSLKDELQTALR	922	S	yes
Q6WRX3	Protein zyg-11 homolog A	1.4276	3	0.977335	48.711	VAGGASMSQISEALSR	351	S	yes
Q6X4W1	NMDA receptor synaptonuclear signaling and neuronal migration factor (Nasal embryonic luteinizing hormone-releasing hormone factor) (Nasal embryonic LHRH factor)	0.18263	2,4	0.999989	61.56	TLMTPYR	480	T	yes
Q6XPR3	Repetin	0.43943	4	0.498174	53.188	VSHKSTSGQAKWQGHIFALNR	211	S	yes
Q6XPR3	Repetin	0.43943	4	0.498174	53.188	VSHKSTSGQAKWQGHIFALNR	214	S	yes
Q6Y7W6	GRB10-interacting GYF protein 2 (PERQ amino acid-rich with GYF domain-containing protein 2) (Trinucleotide repeat-containing gene 15 protein)	0.57259	3	0.999935	70.68	NFSMSVNSAAVLR	98	S	yes
Q6ZMW3	Echinoderm microtubule-associated protein-like 6 (EMAP-6) (Echinoderm microtubule-associated protein-like 5-like)	0.33559	2,3	0.999987	63.283	FSKDTGK	1091	S	yes
Q6ZMW3	Echinoderm microtubule-associated protein-like 6 (EMAP-6) (Echinoderm microtubule-associated protein-like 5-like)	0.62824	2,3	0.999986	60.518	EMISDIKFSK	1091	S	yes
Q6ZMZ3	Nesprin-3 (KASH domain-containing protein 3) (KASH3) (Nuclear envelope spectrin repeat protein 3)	0.39966	2	1	140.45	SKLQELEAR	843	S	yes
Q6ZN03	Putative uncharacterized protein encoded by LINC00322	2.2657	3	0.999989	105.2	NDLESLLSEGR	45	S	yes
Q6ZN84	Coiled-coil domain-containing protein 81	0.094229	3	0.5	74.611	DISSPKRLR	255	S	yes
Q6ZN84	Coiled-coil domain-containing protein 81	0.094229	3	0.5	74.611	DISSPKRLR	256	S	yes
Q6ZNC4	Zinc finger protein 704	2.9464	3	0.99983	79.23	TADTKKASR	34	T	yes
Q6ZNC4	Zinc finger protein 704	0.64421	2	1	63.662	SICLLEQKRK	53	S	yes
Q6ZQQ6	WD repeat-containing protein 87 (Testis development protein NYD-SP11)	1.696	3	1	103.88	EKLAETEKK	1912	T	yes
Q6ZRI6	Uncharacterized protein C15orf39	2.2733	2	0.999996	71.031	PTAEASPVKASR	591	S	yes
Q6ZRK6	Coiled-coil domain-containing protein 73 (Sarcoma antigen NY-SAR-79)	1.1941	3	0.496652	69.864	STFDLSTSDKK	885	S	yes
Q6ZRK6	Coiled-coil domain-containing protein 73 (Sarcoma antigen NY-SAR-79)	1.1941	3	0.496652	69.864	STFDLSTSDKK	884	T	yes
Q6ZRS2	Helicase SRCAP (EC 3.6.4.-) (Domino homolog 2) (Snf2-related CBP activator)	1.7963	2	0.996824	67.997	IASTMAKDVR	196	S	yes
Q6ZSJ9	Protein shisa-6	2.5224	3	0.701972	41.378	TLSAGGAAVGGRR	34	T	yes
Q6ZSR9	Uncharacterized protein FLJ45252	4.1766	3	0.919164	63.283	IVSQTNK	313	S	yes
Q6ZSR9	Uncharacterized protein FLJ45252	4.1648	3	0.636505	52.725	IVSQTNK	315	T	yes
Q6ZSZ6	Teashirt homolog 1 (Antigen NY-CO-33) (Serologically defined colon cancer antigen 33)	2.8432	3	0.5	48.188	LVPSTKKR	351	S	yes
Q6ZSZ6	Teashirt homolog 1 (Antigen NY-CO-33) (Serologically defined colon cancer antigen 33)	2.8432	3	0.5	48.188	LVPSTKKR	350	T	yes
Q6ZSZ6	Uncharacterized protein FLJ45252	3.6582	3	0.76551	43.297	LTPKSSTPSTVSEK	862	S	yes
Q6ZSZ6	Uncharacterized protein FLJ45252	3.6582	3	0.846226	43.297	LTPKSSTPSTVSEK	852	T	yes
Q6ZU64	Cilia- and flagella-associated protein 65 (Coiled-coil domain-containing protein 108)	3.3885	3	0.343955	71.555	KEESETSEEK	1654	S	yes
Q6ZU65	Ubinuclein-2	1.4585	4	0.5	74.841	RVAFISLSPVR	11	S	yes
Q6ZU65	Ubinuclein-2	1.4585	4	0.5	74.841	RVAFISLSPVR	13	S	yes
Q6ZUT3	FERM domain-containing protein 7	3.6427	3	1	48.561	KSPRNIR	535	S	yes
Q6ZUU3	FOXL2 neighbor protein	5.9668	3	0.999525	82.543	MTRTPVGSAR	2	T	yes
Q70CQ2	Ubiquitin carboxyl-terminal hydrolase 34 (EC 3.4.19.12) (Deubiquitinating enzyme 34) (Ubiquitin thioesterase 34) (Ubiquitin-specific-processing protease 34)	1.0967	3	1	91.26	TWPGKSR	1560	T	yes
Q70CQ2	Ubiquitin carboxyl-terminal hydrolase 34 (EC 3.4.19.12) (Deubiquitinating enzyme 34) (Ubiquitin thioesterase 34) (Ubiquitin-specific-processing protease 34)	2.073	2	0.950815	42.396	TWPGKSR	1565	S	yes
Q70CQ4	Ubiquitin carboxyl-terminal hydrolase 31 (EC 3.4.19.12) (Deubiquitinating enzyme 31) (Ubiquitin thioesterase 31) (Ubiquitin-specific-processing protease 31)	1.1345	5	0.997843	89.827	KPESTTKR	1023	T	yes
Q70CQ4	Ubiquitin carboxyl-terminal hydrolase 31 (EC 3.4.19.12) (Deubiquitinating enzyme 31) (Ubiquitin thioesterase 31) (Ubiquitin-specific-processing protease 31)	0.04931	3	0.998805	56.729	SPSTSIK	1206	S	yes
Q70EL4	Ubiquitin carboxyl-terminal hydrolase 43 (EC 3.4.19.12) (Deubiquitinating enzyme 43) (Ubiquitin thioesterase 43) (Ubiquitin-specific-processing protease 43)	2.1179	3	0.994648	47.706	YHTLSLGR	1111	S	yes
Q711Q0	Cardiac-enriched FHL2-interacting protein	1.2678	2	0.999999	93.143	DVSAGDSQK	765	S	yes
Q71F23	Centromere protein U (CENP-U) (Centromere protein of 50 kDa) (CENP-50) (Interphase centromere complex protein 24) (KSHV latent nuclear antigen-interacting protein 1) (MLF1-interacting protein) (Polo-box-interacting protein 1)	1.955	2,3	1	99.788	KGKISHDK	215	S	yes
Q71F23	Centromere protein U (CENP-U) (Centromere protein of 50 kDa) (CENP-50) (Interphase centromere complex protein 24) (KSHV latent nuclear antigen-interacting protein 1) (MLF1-interacting protein) (Polo-box-interacting protein 1)	1.2486	2	0.958644	41.052	TGPLSAQPSVEK	194	S	yes
Q76I76	Protein phosphatase Slingshot homolog 2 (EC 3.1.3.16) (EC 3.1.3.48) (SSH-like protein 2) (SSH-2L) (hSSH-2L)	1.3398	3	1	82.171	LSVVEVAPSK	690	S	yes
Q7L2E3	ATP-dependent RNA helicase DHX30 (EC 3.6.4.13) (DEAH box protein 30)	1.985	3	1	65.305	ISAVSVAQR	495	S	yes
Q7L2E3	ATP-dependent RNA helicase DHX30 (EC 3.6.4.13) (DEAH box protein 30)	1.985	3	1	65.305	ISAVSVAQR	498	S	yes
Q7L590	Protein MCM10 homolog (HsMCM10)	3.305	2	0.999997	92.051	TNPNSIK	676	T	yes
Q7L591	Docking protein 3 (Downstream of tyrosine kinase 3)	4.4995	4	0.979412	72.29	AKLVTLLSRER	483	S	yes
Q7L8S5	OTU domain-containing protein 6A (EC 3.4.19.12) (DUBA-2)	1.7344	3	0.967126	74.301	SLKNSVPKTDK	32	S	yes
Q7RTP6	[F-actin]-monooxygenase MICAL3 (EC 1.14.13.225) (Molecule interacting with CasL protein 3) (MICAL-3)	3.6362	3	1	47.606	PAVAPLSGKEAK	837	S	yes
Q7RTP6	[F-actin]-monooxygenase MICAL3 (EC 1.14.13.225) (Molecule interacting with CasL protein 3) (MICAL-3)	4.9541	3	0.983922	42.708	GERPTLVSTLTDR	702	T	yes
Q7RTZ2	Ubiquitin carboxyl-terminal hydrolase 17-like protein 1 (EC 3.4.19.12) (Deubiquitinating enzyme 17-like protein 1) (Ubiquitin thioesterase 17-like protein 1) (Ubiquitin-specific-processing protease 17-like protein 1)	0.0048498	3	0.5	47.603	KTSLPEK	37	S	yes
Q7RTZ2	Ubiquitin carboxyl-terminal hydrolase 17-like protein 1 (EC 3.4.19.12) (Deubiquitinating enzyme 17-like protein 1) (Ubiquitin thioesterase 17-like protein 1) (Ubiquitin-specific-processing protease 17-like protein 1)	0.0048498	3	0.5	47.603	KTSLPEK	36	T	yes
Q7Z2G1	Histone H2B type W-T (H2B histone family member W testis-specific)	5.7425	3	0.84662	78.615	EANSTTSQKQSK	53	T	yes
Q7Z2Y8	Interferon-induced very large GTPase 1 (Interferon-induced very large GTPase pseudogene 1)	0.29599	3	1	76.927	KSQIMNCLLSKR	1064	S	yes
Q7Z2Y8	Interferon-induced very large GTPase 1 (Interferon-induced very large GTPase pseudogene 1)	1.7684	3	1	63.091	KTDYEKELLEK	1859	T	yes
Q7Z2Y8	Interferon-induced very large GTPase 1 (Interferon-induced very large GTPase pseudogene 1)	4.9237	3	0.999256	59.116	TIEEEVKSASTQKR	2007	T	yes
Q7Z309	Protein FAM122B	0.079877	2,3,4	0.999961	111.95	RNSTTIMSR	55	S	yes
Q7Z333	Probable helicase senataxin (EC 3.6.4.-) (Amyotrophic lateral sclerosis 4 protein) (SEN1 homolog) (Senataxin)	0.40143	3	0.994919	46.318	EHPEQHVSTVNSK	1055	S	yes
Q7Z3G6	Prickle-like protein 2	0.0020003	3	1	89.266	TRHPISSLK	520	T	yes
Q7Z3I7	Zinc finger protein 572	0.9198	3	1	102.62	RTHIGEK	461	T	yes
Q7Z417	Nuclear fragile X mental retardation-interacting protein 2 (82 kDa FMRP-interacting protein) (82-FIP) (Cell proliferation-inducing gene 1 protein) (FMRP-interacting protein 2)	0.00043834	3,4	0.412292	105.57	TIQNSSVSPTSSSSSSSSTGETQTQSSSR	380	S	yes
Q7Z417	Nuclear fragile X mental retardation-interacting protein 2 (82 kDa FMRP-interacting protein) (82-FIP) (Cell proliferation-inducing gene 1 protein) (FMRP-interacting protein 2)	0.0016789	3,4	0.412292	105.57	TIQNSSVSPTSSSSSSSSTGETQTQSSSR	381	S	yes
Q7Z417	Nuclear fragile X mental retardation-interacting protein 2 (82 kDa FMRP-interacting protein) (82-FIP) (Cell proliferation-inducing gene 1 protein) (FMRP-interacting protein 2)	0.015908	3,4	0.595568	105.57	TIQNSSVSPTSSSSSSSSTGETQTQSSSR	382	S	yes
Q7Z417	Nuclear fragile X mental retardation-interacting protein 2 (82 kDa FMRP-interacting protein) (82-FIP) (Cell proliferation-inducing gene 1 protein) (FMRP-interacting protein 2)	0.015908	3,4	0.412292	105.57	TIQNSSVSPTSSSSSSSSTGETQTQSSSR	383	S	yes
Q7Z417	Nuclear fragile X mental retardation-interacting protein 2 (82 kDa FMRP-interacting protein) (82-FIP) (Cell proliferation-inducing gene 1 protein) (FMRP-interacting protein 2)	0.017173	3,4	0.32877	97.214	TIQNSSVSPTSSSSSSSSTGETQTQSSSR	376	S	yes
Q7Z417	Nuclear fragile X mental retardation-interacting protein 2 (82 kDa FMRP-interacting protein) (82-FIP) (Cell proliferation-inducing gene 1 protein) (FMRP-interacting protein 2)	0.00043834	3,4	0.225231	97.214	TIQNSSVSPTSSSSSSSSTGETQTQSSSR	379	S	yes
Q7Z417	Nuclear fragile X mental retardation-interacting protein 2 (82 kDa FMRP-interacting protein) (82-FIP) (Cell proliferation-inducing gene 1 protein) (FMRP-interacting protein 2)	0.015908	3,4	0.595568	97.214	TIQNSSVSPTSSSSSSSSTGETQTQSSSR	384	S	yes
Q7Z417	Nuclear fragile X mental retardation-interacting protein 2 (82 kDa FMRP-interacting protein) (82-FIP) (Cell proliferation-inducing gene 1 protein) (FMRP-interacting protein 2)	0.0016789	3,4	0.32877	94.639	TIQNSSVSPTSSSSSSSSTGETQTQSSSR	369	T	yes
Q7Z417	Nuclear fragile X mental retardation-interacting protein 2 (82 kDa FMRP-interacting protein) (82-FIP) (Cell proliferation-inducing gene 1 protein) (FMRP-interacting protein 2)	0.0016789	3,4	0.578589	94.639	TIQNSSVSPTSSSSSSSSTGETQTQSSSR	373	S	yes
Q7Z417	Nuclear fragile X mental retardation-interacting protein 2 (82 kDa FMRP-interacting protein) (82-FIP) (Cell proliferation-inducing gene 1 protein) (FMRP-interacting protein 2)	0.0016789	3,4	0.225231	94.639	TIQNSSVSPTSSSSSSSSTGETQTQSSSR	374	S	yes
Q7Z417	Nuclear fragile X mental retardation-interacting protein 2 (82 kDa FMRP-interacting protein) (82-FIP) (Cell proliferation-inducing gene 1 protein) (FMRP-interacting protein 2)	0.0058768	3,4	0.578589	94.639	TIQNSSVSPTSSSSSSSSTGETQTQSSSR	378	T	yes
Q7Z417	Nuclear fragile X mental retardation-interacting protein 2 (82 kDa FMRP-interacting protein) (82-FIP) (Cell proliferation-inducing gene 1 protein) (FMRP-interacting protein 2)	0.015908	4	0.0941548	68.243	TIQNSSVSPTSSSSSSSSTGETQTQSSSR	385	S	yes
Q7Z417	Nuclear fragile X mental retardation-interacting protein 2 (82 kDa FMRP-interacting protein) (82-FIP) (Cell proliferation-inducing gene 1 protein) (FMRP-interacting protein 2)	0.015908	4	0.0941548	68.243	TIQNSSVSPTSSSSSSSSTGETQTQSSSR	386	S	yes
Q7Z417	Nuclear fragile X mental retardation-interacting protein 2 (82 kDa FMRP-interacting protein) (82-FIP) (Cell proliferation-inducing gene 1 protein) (FMRP-interacting protein 2)	0.015908	4	0.0941548	68.243	TIQNSSVSPTSSSSSSSSTGETQTQSSSR	387	T	yes
Q7Z460	CLIP-associating protein 1 (Cytoplasmic linker-associated protein 1) (Multiple asters homolog 1) (Protein Orbit homolog 1) (hOrbit1)	2.2376	3	0.998605	82.85	SVSTTGSLQR	588	S	yes
Q7Z460	CLIP-associating protein 1 (Cytoplasmic linker-associated protein 1) (Multiple asters homolog 1) (Protein Orbit homolog 1) (hOrbit1)	1.6309	4	0.838541	40.154	ETSPNRIGLAR	730	T	yes
Q7Z4I7	LIM and senescent cell antigen-like-containing domain protein 2 (LIM-like protein 2) (Particularly interesting new Cys-His protein 2) (PINCH-2)	2.1077	3	0.966395	46.001	LSELTSRKAQPK	324	S	yes
Q7Z5J4	Retinoic acid-induced protein 1	0.7924	2	0.980266	75.652	TSARGLSRR	1772	S	yes
Q7Z699	Sprouty-related, EVH1 domain-containing protein 1 (Spred-1) (hSpred1)	1.0247	3	0.572547	46.663	QISKECGSLKSQNR	222	S	yes
Q7Z699	Sprouty-related, EVH1 domain-containing protein 1 (Spred-1) (hSpred1)	1.4386	3	0.997491	45.28	KQISKECGSLK	223	S	yes
Q7Z6E9	E3 ubiquitin-protein ligase RBBP6 (EC 2.3.2.27) (Proliferation potential-related protein) (Protein P2P-R) (RING-type E3 ubiquitin transferase RBBP6) (Retinoblastoma-binding Q protein 1) (RBQ-1) (Retinoblastoma-binding protein 6) (p53-associated cellular protein of testis)	0.64315	5	0.49996	49.621	ASSNKDFTPNRDK	1462	S	yes
Q7Z6E9	E3 ubiquitin-protein ligase RBBP6 (EC 2.3.2.27) (Proliferation potential-related protein) (Protein P2P-R) (RING-type E3 ubiquitin transferase RBBP6) (Retinoblastoma-binding Q protein 1) (RBQ-1) (Retinoblastoma-binding protein 6) (p53-associated cellular protein of testis)	0.64315	5	0.49996	49.621	ASSNKDFTPNRDK	1463	S	yes
Q7Z6G8	Ankyrin repeat and sterile alpha motif domain-containing protein 1B (Amyloid-beta protein intracellular domain-associated protein 1) (AIDA-1) (E2A-PBX1-associated protein) (EB-1)	0.42813	2	0.966848	46.406	STEQMKK	1096	T	yes
Q7Z7B0	Filamin-A-interacting protein 1 (FILIP)	4.7004	3	0.892374	53.905	PVNVTAEKEVSTGTVLRSPR	1104	S	yes
Q86SQ0	Pleckstrin homology-like domain family B member 2 (Protein LL5-beta)	4.8643	3	0.487441	63.662	SETTELMKEK	635	S	yes
Q86SQ0	Pleckstrin homology-like domain family B member 2 (Protein LL5-beta)	2.0421	2	0.47409	54.982	KSETTELMK	637	S	yes
Q86SQ0	Pleckstrin homology-like domain family B member 2 (Protein LL5-beta)	2.0421	2	0.47409	54.982	KSETTELMK	635	T	yes
Q86T24	Transcriptional regulator Kaiso (Zinc finger and BTB domain-containing protein 33)	1.6321	2,3	0.999982	78.342	RSYVCLTSLR	502	S	yes
Q86T24	Transcriptional regulator Kaiso (Zinc finger and BTB domain-containing protein 33)	1.6321	2,3	0.999982	78.342	SYVCLTSLR	502	S	yes
Q86TL0	Cysteine protease ATG4D (EC 3.4.22.-) (AUT-like 4 cysteine endopeptidase) (Autophagin-4) (Autophagy-related cysteine endopeptidase 4) (Autophagy-related protein 4 homolog D) [Cleaved into: Cysteine protease ATG4D, mitochondrial]	0.28422	3	1	84.817	FLTAWNNVK	71	T	yes
Q86U42	Polyadenylate-binding protein 2 (PABP-2) (Poly(A)-binding protein 2) (Nuclear poly(A)-binding protein 1) (Poly(A)-binding protein II) (PABII) (Polyadenylate-binding nuclear protein 1)	5.8604	3	0.994475	52.693	SRFYSGFNSRPR	286	S	yes
Q86U42	Polyadenylate-binding protein 2 (PABP-2) (Poly(A)-binding protein 2) (Nuclear poly(A)-binding protein 1) (Poly(A)-binding protein II) (PABII) (Polyadenylate-binding nuclear protein 1)	3.5201	2	0.983621	42.629	SRFYSGFNSR	282	S	yes
Q86U42	Polyadenylate-binding protein 2 (PABP-2) (Poly(A)-binding protein 2) (Nuclear poly(A)-binding protein 1) (Poly(A)-binding protein II) (PABII) (Polyadenylate-binding nuclear protein 1)	3.8453	2	0.499631	41.283	SRFYSGFNSR	278	S	yes
Q86U70	LIM domain-binding protein 1 (LDB-1) (Carboxyl-terminal LIM domain-binding protein 2) (CLIM-2) (LIM domain-binding factor CLIM2) (hLdb1) (Nuclear LIM interactor)	0.64441	3	0.887061	48.532	SENPTSQASQ	410	S	yes
Q86U86	Protein polybromo-1 (hPB1) (BRG1-associated factor 180) (BAF180) (Polybromo-1D)	4.7917	3	1	86.833	RLSAIFLR	681	S	yes
Q86U86	Protein polybromo-1 (hPB1) (BRG1-associated factor 180) (BAF180) (Polybromo-1D)	4.8893	3	0.5	71.344	GAHTTMADALWR	1661	T	yes
Q86U86	Protein polybromo-1 (hPB1) (BRG1-associated factor 180) (BAF180) (Polybromo-1D)	4.8893	3	0.5	71.344	GAHTTMADALWR	1660	T	yes
Q86UR5	Regulating synaptic membrane exocytosis protein 1 (Rab-3-interacting molecule 1) (RIM 1) (Rab-3-interacting protein 2)	0.74771	3	0.954784	66.498	ISSFTPKMQGR	1377	S	yes
Q86UR5	Regulating synaptic membrane exocytosis protein 1 (Rab-3-interacting molecule 1) (RIM 1) (Rab-3-interacting protein 2)	0.26033	3	0.997388	56.432	KGTASDAER	1179	T	yes
Q86UY8	5'-nucleotidase domain-containing protein 3 (EC 3.1.3.-) (GRP94-neighboring nucleotidase)	2.2108	3	1	65.627	MTMAAAAVVAR	2	T	yes
Q86V15	Zinc finger protein castor homolog 1 (Castor-related protein) (Putative survival-related protein) (Zinc finger protein 693)	2.4814	3	1	48.602	KFCGRTHMYK	1472	T	yes
Q86VD1	MORC family CW-type zinc finger protein 1 (Cancer/testis antigen 33) (CT33)	0.71824	5	0.994623	40.208	TLSLFYGVNVENRSQAGMFIYSNNR	364	S	yes
Q86VE0	Myb-related transcription factor, partner of profilin (Myb-related protein p42POP) (Partner of profilin)	2.3521	2	1	48.188	KELAGTLR	280	T	yes
Q86VF7	Nebulin-related-anchoring protein (N-RAP)	0.3039	3	0.872532	69.045	TKGKAMGTADSR	590	T	yes
Q86VI3	Ras GTPase-activating-like protein IQGAP3	1.2774	3	0.999768	132.08	SLSKEKR	944	S	yes
Q86VX9	Vacuolar fusion protein MON1 homolog A	2.8968	3	1	79.23	KMATDMQRK	4	T	yes
Q86W92	Liprin-beta-1 (Protein tyrosine phosphatase receptor type f polypeptide-interacting protein-binding protein 1) (PTPRF-interacting protein-binding protein 1) (hSGT2)	4.3712	2	0.999999	76.868	ATAGPRLGWSR	622	T	yes
Q86W92	Liprin-beta-1 (Protein tyrosine phosphatase receptor type f polypeptide-interacting protein-binding protein 1) (PTPRF-interacting protein-binding protein 1) (hSGT2)	0.13862	3	0.914342	56.147	VSEMDSERLQYEK	215	S	yes
Q86X51	Uncharacterized protein CXorf67	0.44979	2	0.999994	79.875	STSTTPGTGLRSR	347	S	yes
Q86XH1	Dynein regulatory complex protein 11 (IQ and AAA domain-containing protein 1)	0.3226	3	0.99997	112.44	KVTDTWAAALR	207	T	yes
Q86YN6	Peroxisome proliferator-activated receptor gamma coactivator 1-beta (PGC-1-beta) (PPAR-gamma coactivator 1-beta) (PPARGC-1-beta) (PGC-1-related estrogen receptor alpha coactivator)	0.67717	2	0.896065	89.231	PCVKADSTQDK	198	T	yes
Q86YN6	Peroxisome proliferator-activated receptor gamma coactivator 1-beta (PGC-1-beta) (PPAR-gamma coactivator 1-beta) (PPARGC-1-beta) (PGC-1-related estrogen receptor alpha coactivator)	0.25959	2	0.961803	63.16	PCVKADSTQDK	197	S	yes
Q8IUD2	ELKS/Rab6-interacting/CAST family member 1 (ERC-1) (Rab6-interacting protein 2)	0.16186	2	1	74.611	VKQELESMK	890	S	yes
Q8IUF8	Ribosomal oxygenase 2 (60S ribosomal protein L27a histidine hydroxylase) (Bifunctional lysine-specific demethylase and histidyl-hydroxylase MINA) (EC 1.14.11.-) (Histone lysine demethylase MINA) (MYC-induced nuclear antigen) (Mineral dust-induced gene protein) (Nucleolar protein 52) (Ribosomal oxygenase MINA) (ROX)	5.9592	3	0.996473	53.237	ELLSSDMK	327	S	yes
Q8IUQ4	E3 ubiquitin-protein ligase SIAH1 (EC 2.3.2.27) (RING-type E3 ubiquitin transferase SIAH1) (Seven in absentia homolog 1) (Siah-1) (Siah-1a)	3.1487	3	0.725642	43.454	MSRQTATALPTGTSK	13	T	yes
Q8IV36	Protein HID1 (Down-regulated in multiple cancers 1) (HID1 domain-containing protein) (Protein hid-1 homolog)	4.5323	3	0.993242	62.298	GSTDSKLNFR	4	S	yes
Q8IV36	Protein HID1 (Down-regulated in multiple cancers 1) (HID1 domain-containing protein) (Protein hid-1 homolog)	3.9153	2	0.499993	62.298	GSTDSKLNFR	3	T	yes
Q8IV36	Protein HID1 (Down-regulated in multiple cancers 1) (HID1 domain-containing protein) (Protein hid-1 homolog)	1.2793	3	0.944451	52.495	MGSTDSKLNFR	6	S	yes
Q8IV42	L-seryl-tRNA(Sec) kinase (EC 2.7.1.164) (O-phosphoseryl-tRNA(Sec) kinase)	0.22528	2	0.998115	61.435	IVSQTMKEAK	287	T	yes
Q8IV63	Inactive serine/threonine-protein kinase VRK3 (Serine/threonine-protein pseudokinase VRK3) (Vaccinia-related kinase 3)	3.7757	3	0.920006	80.688	SSPQKTR	107	S	yes
Q8IV63	Inactive serine/threonine-protein kinase VRK3 (Serine/threonine-protein pseudokinase VRK3) (Vaccinia-related kinase 3)	1.5946	3	0.920117	49.189	VKWSSTVTSPR	71	S	yes
Q8IVE3	Pleckstrin homology domain-containing family H member 2	4.9099	3	1	149.49	SEEMSKISSK	209	S	yes
Q8IVE3	Pleckstrin homology domain-containing family H member 2	4.0081	3	0.779547	40.715	SSSRTSESDSRSR	641	S	yes
Q8IVF6	Ankyrin repeat domain-containing protein 18A	3.5147	3	0.5	51.695	LNEKMITKTVAR	381	T	yes
Q8IVF6	Ankyrin repeat domain-containing protein 18A	3.5147	3	0.5	51.695	LNEKMITKTVAR	383	T	yes
Q8IVF7	Formin-like protein 3 (Formin homology 2 domain-containing protein 3) (WW domain-binding protein 3) (WBP-3)	3.8024	3	0.999997	110.15	SVPFTARTAKR	1002	S	yes
Q8IVF7	Formin-like protein 3 (Formin homology 2 domain-containing protein 3) (WW domain-binding protein 3) (WBP-3)	4.0123	2	0.99952	62.891	SVPFTARTAK	1009	T	yes
Q8IVM0	Coiled-coil domain-containing protein 50 (Protein Ymer)	3.0566	2,3	0.947204	62.732	TAKAANSKSK	249	S	yes
Q8IVM0	Coiled-coil domain-containing protein 50 (Protein Ymer)	1.0263	3	0.999969	54.471	TAKAANSK	241	T	yes
Q8IVM0	Coiled-coil domain-containing protein 50 (Protein Ymer)	2.5886	2,3	0.945543	44.614	TAKAANSKSK	247	S	yes
Q8IVT2	Mitotic interactor and substrate of PLK1 (Mitotic spindle positioning protein)	2.5074	3	0.999977	81.565	AATSPKATMSPR	466	S	yes
Q8IWA0	WD repeat-containing protein 75 (U3 small nucleolar RNA-associated protein 17 homolog)	2.8737	3	0.875276	48.547	DRSIFTGLMIDPR	338	T	yes
Q8IWA6	Coiled-coil domain-containing protein 60	1.0798	3	0.499489	78.615	KLQSSPNSGAVR	12	S	yes
Q8IWA6	Coiled-coil domain-containing protein 60	1.0798	3	0.499489	78.615	KLQSSPNSGAVR	13	S	yes
Q8IWE2	Protein NOXP20 (Nervous system overexpressed protein 20) (Protein FAM114A1)	1.6288	3	0.999998	63.212	TMNVLAESDPGFKR	238	T	yes
Q8IWE2	Protein NOXP20 (Nervous system overexpressed protein 20) (Protein FAM114A1)	4.3061	3	0.967595	53.395	TMNVLAESDPGFK	245	S	yes
Q8IWF9	Coiled-coil domain-containing protein 83	3.1438	4	0.999973	56.043	KLMSVESKK	374	S	yes
Q8IWI9	MAX gene-associated protein (MAX dimerization protein 5)	4.1792	4	0.999435	46.796	VGSFIIELASQRKSR	1371	S	yes
Q8IWI9	MAX gene-associated protein (MAX dimerization protein 5)	4.546	3	0.633001	43.297	MASSSGTATNRPGK	1506	S	yes
Q8IWQ3	Serine/threonine-protein kinase BRSK2 (EC 2.7.11.1) (Brain-selective kinase 2) (EC 2.7.11.26) (Brain-specific serine/threonine-protein kinase 2) (BR serine/threonine-protein kinase 2) (Serine/threonine-protein kinase 29) (Serine/threonine-protein kinase SAD-A)	1.1513	3	1	72.681	SWFGNFISLEK	520	S	yes
Q8IWR0	Zinc finger CCCH domain-containing protein 7A	4.3153	2	0.999982	80.24	MSNVSEER	2	S	yes
Q8IWZ3	Ankyrin repeat and KH domain-containing protein 1 (HIV-1 Vpr-binding ankyrin repeat protein) (Multiple ankyrin repeats single KH domain) (hMASK)	1.5298	3	0.991687	73.248	GVSASQDR	2357	S	yes
Q8IX03	Protein KIBRA (HBeAg-binding protein 3) (Kidney and brain protein) (KIBRA) (WW domain-containing protein 1)	0.73186	3	0.999989	57.009	LDSEAWPGVLDSERDR	327	S	yes
Q8IX12	Cell division cycle and apoptosis regulator protein 1 (Cell cycle and apoptosis regulatory protein 1) (CARP-1) (Death inducer with SAP domain)	1.0893	2	1	71.692	TPQVGDR	179	T	yes
Q8IX12	Cell division cycle and apoptosis regulator protein 1 (Cell cycle and apoptosis regulatory protein 1) (CARP-1) (Death inducer with SAP domain)	4.31	3	0.996044	65.157	SSQQQTQPQK	137	S	yes
Q8IX21	SMC5-SMC6 complex localization factor protein 2 (Smc5/6 localization factor 1)	1.6942	3	1	80.706	MSLEKQLK	948	S	yes
Q8IXM3	39S ribosomal protein L41, mitochondrial (L41mt) (MRP-L41) (39S ribosomal protein L27 homolog) (Bcl-2-interacting mitochondrial ribosomal protein L41) (Cell proliferation-inducing gene 3 protein) (MRP-L27 homolog) (Mitochondrial large ribosomal subunit protein mL41)	0.016493	2,3,4	0.999497	105.86	MSKWTSKR	19	S	yes
Q8IXM3	39S ribosomal protein L41, mitochondrial (L41mt) (MRP-L41) (39S ribosomal protein L27 homolog) (Bcl-2-interacting mitochondrial ribosomal protein L41) (Cell proliferation-inducing gene 3 protein) (MRP-L27 homolog) (Mitochondrial large ribosomal subunit protein mL41)	2.6855	3	0.876753	45.077	KMSKWTSK	24	S	yes
Q8IXM3	39S ribosomal protein L41, mitochondrial (L41mt) (MRP-L41) (39S ribosomal protein L27 homolog) (Bcl-2-interacting mitochondrial ribosomal protein L41) (Cell proliferation-inducing gene 3 protein) (MRP-L27 homolog) (Mitochondrial large ribosomal subunit protein mL41)	0.22321	4	0.887237	42.109	SKWTSKR	23	S	yes
Q8IXQ4	GPALPP motifs-containing protein 1 (Lipopolysaccharide-specific response protein 7)	0.65968	3	0.549979	54.199	RSESLMDIHHKK	275	S	yes
Q8IXQ4	GPALPP motifs-containing protein 1 (Lipopolysaccharide-specific response protein 7)	0.11699	3	0.5	45.864	SESLMDIHHKK	275	S	yes
Q8IXQ4	GPALPP motifs-containing protein 1 (Lipopolysaccharide-specific response protein 7)	0.11699	3	0.5	45.864	SESLMDIHHKK	273	S	yes
Q8IXQ5	Kelch-like protein 7	5.7182	3	0.999996	69.846	AASGVEKSSK	4	S	yes
Q8IXQ5	Kelch-like protein 7	2.8451	2	1	47.706	KAASGVEK	5	S	yes
Q8IXZ2	Zinc finger CCCH domain-containing protein 3 (Smad-interacting CPSF-like factor)	3.7203	3	0.991106	50.397	GTCKKTDGTCPFSHHVSK	707	T	yes
Q8IY37	Probable ATP-dependent RNA helicase DHX37 (EC 3.6.4.13) (DEAH box protein 37)	1.2556	3	1	84.734	KTWAGQGASLK	843	T	yes
Q8IY37	Probable ATP-dependent RNA helicase DHX37 (EC 3.6.4.13) (DEAH box protein 37)	2.6466	2	0.995403	48.229	TWAGQGASLK	849	S	yes
Q8IYA6	Cytoskeleton-associated protein 2-like (Radial fiber and mitotic spindle protein) (Radmis)	1.2111	2	0.972989	84.188	SSVNSAVLKDR	234	S	yes
Q8IYD8	Fanconi anemia group M protein (Protein FACM) (EC 3.6.4.13) (ATP-dependent RNA helicase FANCM) (Fanconi anemia-associated polypeptide of 250 kDa) (FAAP250) (Protein Hef ortholog)	0.33016	2	0.998453	52.636	VMSTPLSK	1342	S	yes
Q8IYR0	Cilia- and flagella-associated protein 206	4.3469	4	0.999761	67.749	MPPTQAESVIR	8	S	yes
Q8IYW2	Cilia- and flagella-associated protein 46 (Tetratricopeptide repeat protein 40)	3.7481	2	0.995261	48.608	AESQQDAASLK	14	S	yes
Q8IZC4	Rhotekin-2 (Pleckstrin homology domain-containing family K member 1) (PH domain-containing family K member 1)	5.8582	3	1	41.399	DSDHFSNKER	120	S	yes
Q8IZC4	Rhotekin-2 (Pleckstrin homology domain-containing family K member 1) (PH domain-containing family K member 1)	5.8582	3	1	41.399	DSDHFSNKER	116	S	yes
Q8IZD0	Sterile alpha motif domain-containing protein 14 (SAM domain-containing protein 14)	5.5799	3	0.999913	78.342	GSNRLSMGSR	220	S	yes
Q8IZD0	Sterile alpha motif domain-containing protein 14 (SAM domain-containing protein 14)	0.024115	2	0.999812	55.314	KGSNRLSMGSR	213	S	yes
Q8IZT6	Abnormal spindle-like microcephaly-associated protein (Abnormal spindle protein homolog) (Asp homolog)	4.6637	3	1	56.46	MMHIAATLIQRRFR	2267	T	yes
Q8IZT6	Abnormal spindle-like microcephaly-associated protein (Abnormal spindle protein homolog) (Asp homolog)	0.024064	3	0.999514	52.403	AYKTLHDTR	1863	T	yes
Q8N0U7	Uncharacterized protein C1orf87	0.020159	3	0.833475	43.419	MALRTTNGR	314	T	yes
Q8N0X2	Sperm-associated antigen 16 protein (Pf20 protein homolog)	0.272	3	0.999785	57.267	KGDCILTFEGHSR	436	S	yes
Q8N0X2	Sperm-associated antigen 16 protein (Pf20 protein homolog)	2.3996	4	1	50.053	ENAPEGPTQKGLR	292	T	yes
Q8N0Z6	Tetratricopeptide repeat protein 5 (TPR repeat protein 5) (Stress-responsive activator of p300) (Strap)	0.17561	2	1	63.534	AQVLMLTGK	74	T	yes
Q8N103	T-cell activation Rho GTPase-activating protein (T-cell activation GTPase-activating protein)	3.7127	3	0.999929	126.76	TVSESVQRNK	700	S	yes
Q8N103	T-cell activation Rho GTPase-activating protein (T-cell activation GTPase-activating protein)	2.6865	3	0.999862	48.283	TEKGKPSR	501	S	yes
Q8N122	Regulatory-associated protein of mTOR (Raptor) (p150 target of rapamycin (TOR)-scaffold protein)	2.2536	2	0.999923	54.09	SLIVAGLGDGSIR	1189	S	yes
Q8N184	Zinc finger protein 567	3.9896	3	0.965696	47.062	SVVSINHKK	100	S	yes
Q8N1F1	Putative uncharacterized protein LRRC75A-AS1, mitochondrial (FAM211A antisense RNA 1) (LRRC75A antisense RNA 1) (Putative uncharacterized protein FAM211A-AS1, mitochondrial)	3.7189	2	0.870526	63.534	KMFPGSLSR	7	S	yes
Q8N1G1	RNA exonuclease 1 homolog (EC 3.1.-.-) (Elongin-A-binding protein 1) (EloA-BP1) (Transcription elongation factor B polypeptide 3-binding protein 1)	2.6836	2	1	83.647	RISHLSK	664	S	yes
Q8N1G1	RNA exonuclease 1 homolog (EC 3.1.-.-) (Elongin-A-binding protein 1) (EloA-BP1) (Transcription elongation factor B polypeptide 3-binding protein 1)	1.363	3	0.958495	58.723	STKAPSGKLVER	484	S	yes
Q8N1G1	RNA exonuclease 1 homolog (EC 3.1.-.-) (Elongin-A-binding protein 1) (EloA-BP1) (Transcription elongation factor B polypeptide 3-binding protein 1)	4.9348	3	0.666214	57.794	KKPSSATPVATSGK	439	S	yes
Q8N1P7	Beta/gamma crystallin domain-containing protein 2 (Absent in melanoma 1-like protein)	4.1466	3	0.999627	47.429	MELRTPGTK	5	T	yes
Q8N283	Ankyrin repeat domain-containing protein 35	4.8717	3	0.320501	43.382	RIFSCSSTQVAVERWNR	8	S	yes
Q8N283	Ankyrin repeat domain-containing protein 35	4.8717	3	0.320501	43.382	RIFSCSSTQVAVERWNR	9	S	yes
Q8N283	Ankyrin repeat domain-containing protein 35	4.8717	3	0.320501	43.382	RIFSCSSTQVAVERWNR	10	T	yes
Q8N2M8	CLK4-associating serine/arginine rich protein (Splicing factor, arginine/serine-rich 16) (Suppressor of white-apricot homolog 2)	3.6283	2	0.99706	67.234	QSRSPSPRYSR	653	S	yes
Q8N2M8	CLK4-associating serine/arginine rich protein (Splicing factor, arginine/serine-rich 16) (Suppressor of white-apricot homolog 2)	1.6541	3	0.999752	45.864	TEPAAGKETGAAK	557	T	yes
Q8N2M8	CLK4-associating serine/arginine rich protein (Splicing factor, arginine/serine-rich 16) (Suppressor of white-apricot homolog 2)	3.4998	2	0.92825	42.388	SRSSWSLSPSR	501	S	yes
Q8N2N9	Ankyrin repeat domain-containing protein 36B (CLL-associated antigen KW-1)	0.16849	4	0.287651	42.718	SGTVSPQKQSAQK	322;1088	T	yes
Q8N2Y8	Iporin (Interacting protein of Rab1) (RUN and SH3 domain-containing protein 2)	1.4814	2	1	69.846	AGGDWLRCSR	1488	S	yes
Q8N319	Uncharacterized protein C6orf223	4.1196	2	0.989488	66.595	SGKTSAVLK	46	S	yes
Q8N3D4	EH domain-binding protein 1-like protein 1	0.69926	4	0.999999	71.451	LSRQLSRR	1511	S	yes
Q8N3D4	EH domain-binding protein 1-like protein 1	4.5159	3	0.82641	47.639	EEAQTSGVQEAETR	884	S	yes
Q8N3K9	Cardiomyopathy-associated protein 5 (Dystrobrevin-binding protein 2) (Genethonin-3) (Myospryn) (SPRY domain-containing protein 2) (Tripartite motif-containing protein 76)	1.5627	2	0.999936	99.788	NITKESEK	2401	T	yes
Q8N3K9	Cardiomyopathy-associated protein 5 (Dystrobrevin-binding protein 2) (Genethonin-3) (Myospryn) (SPRY domain-containing protein 2) (Tripartite motif-containing protein 76)	0.71116	3	0.988594	47.706	CPISATDK	3521	S	yes
Q8N3P4	Vacuolar protein sorting-associated protein 8 homolog	3.9591	3	0.999983	60.489	SVYVMMLRSWRER	491	S	yes
Q8N3R9	MAGUK p55 subfamily member 5	0.16852	3	0.925965	112.36	TQSLKTLR	579	T	yes
Q8N3Y7	Epidermal retinol dehydrogenase 2 (EPHD-2) (RDH-E2) (EC 1.1.1.105) (Retinal short-chain dehydrogenase reductase 2) (retSDR2) (Short-chain dehydrogenase/reductase family 16C member 5)	2.3413	3	0.98702	54.722	MSFNLQSSK	8	S	yes
Q8N3Y7	Epidermal retinol dehydrogenase 2 (EPHD-2) (RDH-E2) (EC 1.1.1.105) (Retinal short-chain dehydrogenase reductase 2) (retSDR2) (Short-chain dehydrogenase/reductase family 16C member 5)	1.0254	2	0.899728	52.403	SFNLQSSKK	7	S	yes
Q8N3Y7	Epidermal retinol dehydrogenase 2 (EPHD-2) (RDH-E2) (EC 1.1.1.105) (Retinal short-chain dehydrogenase reductase 2) (retSDR2) (Short-chain dehydrogenase/reductase family 16C member 5)	1.611	2,3	0.996874	48.188	SFNLQSSK	2	S	yes
Q8N4C6	Ninein (hNinein) (Glycogen synthase kinase 3 beta-interacting protein) (GSK3B-interacting protein)	0.065233	4	0.199925	49.298	RTTTSSAMTSTIGFR	283	S	yes
Q8N4C6	Ninein (hNinein) (Glycogen synthase kinase 3 beta-interacting protein) (GSK3B-interacting protein)	0.065233	4	0.199925	49.298	RTTTSSAMTSTIGFR	284	S	yes
Q8N4C6	Ninein (hNinein) (Glycogen synthase kinase 3 beta-interacting protein) (GSK3B-interacting protein)	0.065233	4	0.199925	49.298	RTTTSSAMTSTIGFR	280	T	yes
Q8N4C6	Ninein (hNinein) (Glycogen synthase kinase 3 beta-interacting protein) (GSK3B-interacting protein)	0.065233	4	0.199925	49.298	RTTTSSAMTSTIGFR	281	T	yes
Q8N4C6	Ninein (hNinein) (Glycogen synthase kinase 3 beta-interacting protein) (GSK3B-interacting protein)	0.065233	4	0.199925	49.298	RTTTSSAMTSTIGFR	282	T	yes
Q8N4H0	Spermatogenesis associated 6-like protein	2.3229	3	0.980068	41.689	SKFSDFPFPTR	246	S	yes
Q8N4L4	Spermatid maturation protein 1	2.4427	2,3	0.999868	123.11	EAPKSSLLRK	73	S	yes
Q8N4L4	Spermatid maturation protein 1	2.8784	2	0.5	68.536	EAPKSSLLRK	74	S	yes
Q8N4P6	Leucine-rich repeat-containing protein 71	1.9103	3	0.499834	84.842	PGTQKSSGAVTKK	22	S	yes
Q8N4P6	Leucine-rich repeat-containing protein 71	1.9103	3	0.499834	84.842	PGTQKSSGAVTKK	23	S	yes
Q8N4P6	Leucine-rich repeat-containing protein 71	4.0071	3	0.857641	50.897	EKSQMVGISNSALVDKTDK	348	S	yes
Q8N5C6	S1 RNA-binding domain-containing protein 1	3.7813	3	0.949971	77.318	TGSKGTK	319	S	yes
Q8N5C6	S1 RNA-binding domain-containing protein 1	5.063	2	1	57.174	KQPPPKESK	59	S	yes
Q8N5C6	S1 RNA-binding domain-containing protein 1	0.55248	2	1	42.001	QPPPKESK	59	S	yes
Q8N5G2	Macoilin (Macoilin-1) (Transmembrane protein 57)	2.9015	3	0.5	67.993	KQKCTSK	358	S	yes
Q8N5G2	Macoilin (Macoilin-1) (Transmembrane protein 57)	2.9015	3	0.5	67.993	KQKCTSK	357	T	yes
Q8N5R6	Coiled-coil domain-containing protein 33 (Cancer/testis antigen 61) (CT61)	0.072715	3	0.997263	93.839	KLRTIQESWSK	602	S	yes
Q8N5R6	Coiled-coil domain-containing protein 33 (Cancer/testis antigen 61) (CT61)	0.199	4	0.995038	86.114	KLRTIQESWSK	600	S	yes
Q8N693	Homeobox protein ESX1 (Extraembryonic, spermatogenesis, homeobox 1) [Cleaved into: Homeobox protein ESX1-N; Homeobox protein ESX1-C]	0.67778	2,3	0.511496	48.115	LTVTSLMAR	35	T	yes
Q8N693	Homeobox protein ESX1 (Extraembryonic, spermatogenesis, homeobox 1) [Cleaved into: Homeobox protein ESX1-N; Homeobox protein ESX1-C]	0.67778	2,3	0.83111	47.187	LTVTSLMAR	34	S	yes
Q8N7B6	PACRG-like protein	4.682	3	0.907736	79.659	SSLSTSSPESAR	42	S	yes
Q8N7C3	Probable E3 ubiquitin-protein ligase TRIML2 (EC 2.3.2.27) (RING-type E3 ubiquitin transferase TRIML2) (SPRY domain-containing protein 6) (Tripartite motif family-like protein 2)	0.71368	2	1	74.173	NAKYSLER	162	S	yes
Q8N7C4	Transmembrane protein 217	3.5158	2	0.999994	62.081	SQGNIISYKRR	158	S	yes
Q8N8S7	Protein enabled homolog	1.4095	2	0.499567	57.106	KGSTIETEQK	464	S	yes
Q8N8S7	Protein enabled homolog	1.4095	2	0.499567	57.106	KGSTIETEQK	463	T	yes
Q8N8U2	Chromodomain Y-like protein 2 (CDY-like 2)	1.3581	2	0.929498	58.63	DSRGPSVEK	85	S	yes
Q8N9B5	Junction-mediating and -regulatory protein	1.9855	3	0.999999	91.313	DSGPETLEK	832	S	yes
Q8N9U0	Tandem C2 domains nuclear protein (Membrane targeting tandem C2 domain-containing protein 1) (Tandem C2 protein in nucleus) (Tac2-N)	2.8813	5	0.695034	44.457	KKTIGECSMSLR	325	S	yes
Q8N9U0	Tandem C2 domains nuclear protein (Membrane targeting tandem C2 domain-containing protein 1) (Tandem C2 protein in nucleus) (Tac2-N)	3.7041	5	0.999824	44.457	KKTIGECSMSLR	320	T	yes
Q8N9W8	Protein FAM71D	3.4884	3	0.982332	49.934	SLLTSPPAEK	106	S	yes
Q8NA03	Fibrous sheath-interacting protein 1	0.60815	4	0.842152	49.482	SAKYSEAWQSK	160	S	yes
Q8NA58	Poly(A)-specific ribonuclease PNLDC1 (EC 3.1.13.4) (PARN-like domain-containing protein 1) (Poly(A)-specific ribonuclease domain-containing protein 1) (HsPNLDC1)	4.7284	2	0.989612	62.659	SSPDKDQIK	143	S	yes
Q8NA82	Probable E3 ubiquitin-protein ligase MARCH10 (EC 2.3.2.27) (Membrane-associated RING finger protein 10) (Membrane-associated RING-CH protein X) (MARCH-X) (RING finger protein 190) (RING-type E3 ubiquitin transferase MARCH10)	2.1767	2,3	0.819286	65.179	SSIKISAFK	88	S	yes
Q8NA82	Probable E3 ubiquitin-protein ligase MARCH10 (EC 2.3.2.27) (Membrane-associated RING finger protein 10) (Membrane-associated RING-CH protein X) (MARCH-X) (RING finger protein 190) (RING-type E3 ubiquitin transferase MARCH10)	2.1767	3	0.5	65.179	SSIKISAFK	84	S	yes
Q8NA82	Probable E3 ubiquitin-protein ligase MARCH10 (EC 2.3.2.27) (Membrane-associated RING finger protein 10) (Membrane-associated RING-CH protein X) (MARCH-X) (RING finger protein 190) (RING-type E3 ubiquitin transferase MARCH10)	2.1767	3	1	65.179	SSIKISAFK	83	S	yes
Q8NAP1	Putative protein CASTOR 3 (STAG3 opposite strand transcript protein)	5.4506	3	1	41.427	LAFLFSK	46	S	yes
Q8NAP3	Zinc finger and BTB domain-containing protein 38	0.21958	3	0.999983	61.444	SPNNEGDVHFSR	319	S	yes
Q8NB12	Histone-lysine N-methyltransferase SMYD1 (EC 2.1.1.43) (SET and MYND domain-containing protein 1)	2.4694	4	0.999575	59.862	TIGRMENVEVFTAEGKGR	2	T	yes
Q8NBR9	Uncharacterized protein C11orf72	0.52092	4	0.727592	46.406	KRSTLMSSPR	39	T	yes
Q8NC26	Zinc finger protein 114	3.9935	2	1	61.161	RTFPEANR	67	T	yes
Q8NCD3	Holliday junction recognition protein (14-3-3-associated AKT substrate) (Fetal liver-expressing gene 1 protein) (Up-regulated in lung cancer 9)	5.9104	2	0.968455	73.039	ERKVTPSK	380	T	yes
Q8NDH2	Coiled-coil domain-containing protein 168	5.3048	3	0.5	68.44	DLKRELSTK	1463	S	yes
Q8NDH2	Coiled-coil domain-containing protein 168	5.3048	3	0.5	68.44	DLKRELSTK	1464	T	yes
Q8NDH2	Coiled-coil domain-containing protein 168	1.728	3	0.999167	62.732	GTISKDNSWR	1827	S	yes
Q8NDI1	EH domain-binding protein 1	2.5439	3	0.999914	48.919	STPPPNNLVNPVQELETER	393	T	yes
Q8NDL9	Cytosolic carboxypeptidase-like protein 5 (EC 3.4.17.-) (ATP/GTP-binding protein-like 5)	1.0926	3	0.998699	86.498	GLSSTLNVGVNK	605	S	yes
Q8NDT2	Putative RNA-binding protein 15B (One-twenty two protein 3) (HsOTT3) (HuOTT3) (RNA-binding motif protein 15B)	1.1835	4	0.954828	47.429	GSGSGGGGHRDGR	60	S	yes
Q8NDV3	Structural maintenance of chromosomes protein 1B (SMC protein 1B) (SMC-1-beta) (SMC-1B)	1.031	5	0.999955	48.602	MLTRLNVQLEYSR	815	T	yes
Q8NDX5	Polyhomeotic-like protein 3 (Early development regulatory protein 3) (Homolog of polyhomeotic 3) (hPH3)	3.6164	2,3	0.937138	74.165	TTVTSSK	254	T	yes
Q8NDX5	Polyhomeotic-like protein 3 (Early development regulatory protein 3) (Homolog of polyhomeotic 3) (hPH3)	5.5101	2,3	0.886666	72.325	TTVTSSK	253	S	yes
Q8NDX5	Polyhomeotic-like protein 3 (Early development regulatory protein 3) (Homolog of polyhomeotic 3) (hPH3)	0.95676	2,3	0.937138	72.325	TTVTSSKISQR	253	T	yes
Q8NDX5	Polyhomeotic-like protein 3 (Early development regulatory protein 3) (Homolog of polyhomeotic 3) (hPH3)	1.7413	3	0.999522	55.213	TTVTSSKISQR	250	T	yes
Q8NDZ2	SUMO-interacting motif-containing protein 1	0.18748	3	0.87046	54.343	APASASGEDLR	7	S	yes
Q8NE18	Putative methyltransferase NSUN7 (EC 2.1.1.-) (NOL1/NOP2/Sun domain family member 7)	4.4051	3	0.999733	84.479	DDTPSSLLR	706	T	yes
Q8NEL9	Phospholipase DDHD1 (EC 3.1.1.-) (DDHD domain-containing protein 1) (Phosphatidic acid-preferring phospholipase A1 homolog) (PA-PLA1)	2.7867	2	1	41.283	KNTAMMR	428	T	yes
Q8NEM8	Cytosolic carboxypeptidase 3 (EC 3.4.17.-) (ATP/GTP-binding protein-like 3)	3.7565	2	1	80.916	EPCFVYSR	149	S	yes
Q8NEN0	Armadillo repeat-containing protein 2	4.6521	2	1	72.496	LSPNDKMLGK	3	S	yes
Q8NEZ4	Histone-lysine N-methyltransferase 2C (Lysine N-methyltransferase 2C) (EC 2.1.1.43) (Homologous to ALR protein) (Myeloid/lymphoid or mixed-lineage leukemia protein 3)	1.1024	3	0.49475	75.574	RQQQQDSIDPSSR	1728	S	yes
Q8NEZ4	Histone-lysine N-methyltransferase 2C (Lysine N-methyltransferase 2C) (EC 2.1.1.43) (Homologous to ALR protein) (Myeloid/lymphoid or mixed-lineage leukemia protein 3)	1.1024	3	0.49475	75.574	RQQQQDSIDPSSR	1729	S	yes
Q8NEZ4	Histone-lysine N-methyltransferase 2C (Lysine N-methyltransferase 2C) (EC 2.1.1.43) (Homologous to ALR protein) (Myeloid/lymphoid or mixed-lineage leukemia protein 3)	4.3651	2	1	70.54	PSPRADVFQR	2011	S	yes
Q8NEZ4	Histone-lysine N-methyltransferase 2C (Lysine N-methyltransferase 2C) (EC 2.1.1.43) (Homologous to ALR protein) (Myeloid/lymphoid or mixed-lineage leukemia protein 3)	1.5251	2	0.999951	65.305	TEVLSPNSK	2831	S	yes
Q8NEZ4	Histone-lysine N-methyltransferase 2C (Lysine N-methyltransferase 2C) (EC 2.1.1.43) (Homologous to ALR protein) (Myeloid/lymphoid or mixed-lineage leukemia protein 3)	1.3402	4	0.89658	49.482	RQQQQDSIDPSSR	1724	S	yes
Q8NF91	Nesprin-1 (Enaptin) (KASH domain-containing protein 1) (KASH1) (Myocyte nuclear envelope protein 1) (Myne-1) (Nuclear envelope spectrin repeat protein 1) (Synaptic nuclear envelope protein 1) (Syne-1)	3.68	3	0.999998	64.73	SQLEGALSK	3382	S	yes
Q8NF91	Nesprin-1 (Enaptin) (KASH domain-containing protein 1) (KASH1) (Myocyte nuclear envelope protein 1) (Myne-1) (Nuclear envelope spectrin repeat protein 1) (Synaptic nuclear envelope protein 1) (Syne-1)	5.6839	3	0.991122	63.16	TNELLKAATNK	7270	T	yes
Q8NF91	Nesprin-1 (Enaptin) (KASH domain-containing protein 1) (KASH1) (Myocyte nuclear envelope protein 1) (Myne-1) (Nuclear envelope spectrin repeat protein 1) (Synaptic nuclear envelope protein 1) (Syne-1)	0.33713	3	0.741882	53.008	LQDEQEIVQKRTFTK	34	T	yes
Q8NF91	Nesprin-1 (Enaptin) (KASH domain-containing protein 1) (KASH1) (Myocyte nuclear envelope protein 1) (Myne-1) (Nuclear envelope spectrin repeat protein 1) (Synaptic nuclear envelope protein 1) (Syne-1)	4.4366	2	0.994749	41.399	TKRISAK	1286	S	yes
Q8NFU5	Inositol polyphosphate multikinase (EC 2.7.1.151) (Inositol 1,3,4,6-tetrakisphosphate 5-kinase)	1.6953	3	0.869406	53.08	SLSKMYAR	315	S	yes
Q8NFW5	Diencephalon/mesencephalon homeobox protein 1 (Orthodenticle homolog 3) (Paired-like homeobox protein DMBX1)	5.7634	3	0.999975	61.235	PSVHALTLAER	45	T	yes
Q8NG27	E3 ubiquitin-protein ligase Praja-1 (Praja1) (EC 2.3.2.27) (RING finger protein 70) (RING-type E3 ubiquitin transferase Praja-1)	0.12827	4	1	55.176	IRNLASPNCVK	265	S	yes
Q8NG31	Kinetochore scaffold 1 (ALL1-fused gene from chromosome 15q14 protein) (AF15q14) (Bub-linking kinetochore protein) (Blinkin) (Cancer susceptibility candidate gene 5 protein) (Cancer/testis antigen 29) (CT29) (Kinetochore-null protein 1) (Protein CASC5) (Protein D40/AF15q14)	5.0868	2	1	122.69	EFSIIEHTR	158	T	yes
Q8NHU2	Cilia- and flagella-associated protein 61	0.52874	3	0.997447	56.205	KMSVLTSPR	7	S	yes
Q8NHU2	Cilia- and flagella-associated protein 61	1.0825	2	0.841281	50.791	KMSVLTSPR	3	S	yes
Q8NHV4	Protein NEDD1 (Neural precursor cell expressed developmentally down-regulated protein 1) (NEDD-1)	3.0088	4	1	45.115	KIYMGKQESK	493	S	yes
Q8NI35	InaD-like protein (Inadl protein) (hINADL) (Pals1-associated tight junction protein) (Protein associated to tight junctions)	5.0518	4	0.999545	42.976	VPDSPENELKSR	522	S	yes
Q8NI77	Kinesin-like protein KIF18A (Marrow stromal KIF18A) (MS-KIF18A)	0.72141	3	1	74.841	NICKINPSMVR	883	S	yes
Q8TAD4	Zinc transporter 5 (ZnT-5) (Solute carrier family 30 member 5) (ZnT-like transporter 1) (hZTL1)	0.082429	2	0.5	56.205	QILEESDSR	416	S	yes
Q8TAD4	Zinc transporter 5 (ZnT-5) (Solute carrier family 30 member 5) (ZnT-like transporter 1) (hZTL1)	0.082429	2	0.5	56.205	QILEESDSR	414	S	yes
Q8TAT5	Endonuclease 8-like 3 (EC 3.2.2.-) (EC 4.2.99.18) (DNA glycosylase FPG2) (DNA glycosylase/AP lyase Neil3) (Endonuclease VIII-like 3) (Nei-like protein 3)	0.0249	4	0.999864	62.732	NSMESQQRIR	140	S	yes
Q8TAW3	Zinc finger protein 671	1.0672	3,4	1	105.25	LVSGFLMGQR	276	S	yes
Q8TBY8	Polyamine-modulated factor 1-binding protein 1 (PMF-1-binding protein)	1.7232	3	0.999224	45.997	TLKENSR	655	T	yes
Q8TBZ0	Coiled-coil domain-containing protein 110 (Cancer/testis antigen 52) (CT52) (Cancer/testis antigen KM-HN-1)	0.039095	3	1	55.04	ISELEALVK	313	S	yes
Q8TBZ0	Coiled-coil domain-containing protein 110 (Cancer/testis antigen 52) (CT52) (Cancer/testis antigen KM-HN-1)	2.6329	3	0.999652	50.053	VPRYTLSFLDQTK	388	T	yes
Q8TBZ5	Zinc finger protein 502	1.3718	3	0.454036	91.961	SLLLTSSLVTR	112	S	yes
Q8TC56	Protein FAM71B	0.024059	2,3	0.96404	77.42	NQSASSTGALQK	520	S	yes
Q8TC56	Protein FAM71B	1.9826	3	0.328162	42.382	NQSASSTGALQKK	523	S	yes
Q8TC56	Protein FAM71B	1.9826	3	0.328162	42.382	NQSASSTGALQKK	522	S	yes
Q8TD26	Chromodomain-helicase-DNA-binding protein 6 (CHD-6) (EC 3.6.4.12) (ATP-dependent helicase CHD6) (Radiation-induced gene B protein)	5.1217	2	0.5	105.2	EASGTKEAK	161	S	yes
Q8TD26	Chromodomain-helicase-DNA-binding protein 6 (CHD-6) (EC 3.6.4.12) (ATP-dependent helicase CHD6) (Radiation-induced gene B protein)	5.1217	2	0.5	105.2	EASGTKEAK	163	T	yes
Q8TDD2	Transcription factor Sp7 (Zinc finger protein osterix)	1.4525	2	0.499607	80.755	DSTTLGK	37	S	yes
Q8TDD2	Transcription factor Sp7 (Zinc finger protein osterix)	1.4525	2	0.499607	80.755	DSTTLGK	36	T	yes
Q8TDG2	Actin-related protein T1 (ARP-T1)	1.2698	2	0.998019	89.679	MVSSSIMK	280	S	yes
Q8TDG4	Helicase POLQ-like (EC 3.6.4.12) (Mus308-like helicase) (POLQ-like helicase)	3.0136	2	1	63.283	GRFPPTK	425	T	yes
Q8TDJ6	DmX-like protein 2 (Rabconnectin-3)	3.4474	2	0.999952	48.704	SLAYWVMKDYTR	1809	T	yes
Q8TDM6	Disks large homolog 5 (Discs large protein P-dlg) (Placenta and prostate DLG)	0.84075	2	0.996335	126.24	SSTSEKK	462	S	yes
Q8TDM6	Disks large homolog 5 (Discs large protein P-dlg) (Placenta and prostate DLG)	0.73669	3	1	53.278	TVEEVYVEMLKPRDGVR	1559	T	yes
Q8TE49	OTU domain-containing protein 7A (EC 3.4.19.12) (Zinc finger protein Cezanne 2)	0.50151	3	0.861341	47.712	LNWWSTVCTSCKR	194	T	yes
Q8TE54	Anion exchange transporter (Solute carrier family 26 member 7)	0.61958	2	0.999972	82.279	KSMLWSK	10	S	yes
Q8TEM1	Nuclear pore membrane glycoprotein 210 (Nuclear pore protein gp210) (Nuclear envelope pore membrane protein POM 210) (POM210) (Nucleoporin Nup210) (Pore membrane protein of 210 kDa)	4.5557	4	1	46.129	VYVSDNIR	383	S	yes
Q8TF39	Zinc finger protein 483 (Zinc finger protein with KRAB and SCAN domains 16)	2.1475	3	0.49999	57.174	SSRLDESALDK	238	S	yes
Q8TF39	Zinc finger protein 483 (Zinc finger protein with KRAB and SCAN domains 16)	2.1475	3	0.49999	57.174	SSRLDESALDK	237	S	yes
Q8WTR2	Dual specificity protein phosphatase 19 (EC 3.1.3.16) (EC 3.1.3.48) (Dual specificity phosphatase TS-DSP1) (Low molecular weight dual specificity phosphatase 3) (LMW-DSP3) (Protein phosphatase SKRP1) (Stress-activated protein kinase pathway-regulating phosphatase 1) (SAPK pathway-regulating phosphatase 1)	0.018228	2	1	81.784	KIIETWK	34	T	yes
Q8WUA7	TBC1 domain family member 22A	2.0232	3	0.870537	46.352	STAKMPTTPVK	44	S	yes
Q8WUM4	Programmed cell death 6-interacting protein (PDCD6-interacting protein) (ALG-2-interacting protein 1) (ALG-2-interacting protein X) (Hp95)	4.8761	3	0.999999	87.713	GSLFGGSVK	103	S	yes
Q8WUM4	Programmed cell death 6-interacting protein (PDCD6-interacting protein) (ALG-2-interacting protein 1) (ALG-2-interacting protein X) (Hp95)	2.4147	5	0.5	60.691	TSEVDLAKPLVK	13	S	yes
Q8WUM4	Programmed cell death 6-interacting protein (PDCD6-interacting protein) (ALG-2-interacting protein 1) (ALG-2-interacting protein X) (Hp95)	2.4147	5	0.5	60.691	TSEVDLAKPLVK	12	T	yes
Q8WUR7	UPF0235 protein C15orf40	0.29759	3	1	63.283	SGLRHLRATPNTR	17	T	yes
Q8WUR7	UPF0235 protein C15orf40	0.29759	3	1	63.283	SGLRHLRATPNTR	14	T	yes
Q8WUR7	UPF0235 protein C15orf40	1.6897	3	1	57.59	SGLRHLR	6	S	yes
Q8WV16	DDB1- and CUL4-associated factor 4 (WD repeat-containing protein 21A)	0.041149	3	1	105.65	KADIPSVAFSSR	465	S	yes
Q8WVR3	Uncharacterized protein C7orf43	2.0389	3	0.5	40.428	ESQCDYSMYFPAVPLPPRAELAGDPGRYR	3	S	yes
Q8WVR3	Uncharacterized protein C7orf43	2.0389	3	0.5	40.428	ESQCDYSMYFPAVPLPPRAELAGDPGRYR	8	S	yes
Q8WWH5	Probable tRNA pseudouridine synthase 1 (EC 5.4.99.-)	0.56539	2	0.997154	56.432	LTSMLSGSK	146	S	yes
Q8WWH5	Probable tRNA pseudouridine synthase 1 (EC 5.4.99.-)	5.5887	2	0.975173	42.629	MLTSMLSGSK	144	S	yes
Q8WWI1	LIM domain only protein 7 (LMO-7) (F-box only protein 20) (LOMP)	0.012688	3	0.884241	168.85	TSTTGVATTQSPTPR	1576	T	yes
Q8WWI1	LIM domain only protein 7 (LMO-7) (F-box only protein 20) (LOMP)	0.012688	3	0.498116	168.85	TSTTGVATTQSPTPR	1577	S	yes
Q8WWI1	LIM domain only protein 7 (LMO-7) (F-box only protein 20) (LOMP)	0.60913	3	0.712143	54.486	TSTTGVATTQSPTPR	1583	T	yes
Q8WWK9	Cytoskeleton-associated protein 2 (CTCL tumor antigen se20-10) (Tumor- and microtubule-associated protein)	4.2306	3	0.889721	51.875	SHHSNTRDTVK	262	S	yes
Q8WWQ0	PH-interacting protein (PHIP) (IRS-1 PH domain-binding protein) (WD repeat-containing protein 11)	2.0926	3	0.905684	77.318	RNTITKR	1438	T	yes
Q8WWV3	Reticulon-4-interacting protein 1, mitochondrial (NOGO-interacting mitochondrial protein)	0.89335	4	0.999973	78.964	KSGYGATALNMK	93	S	yes
Q8WX93	Palladin (SIH002) (Sarcoma antigen NY-SAR-77)	0.021969	3	0.332857	79.837	TTSVSLTIGSSSPK	390	T	yes
Q8WX93	Palladin (SIH002) (Sarcoma antigen NY-SAR-77)	0.021969	3	0.677863	79.837	TTSVSLTIGSSSPK	392	S	yes
Q8WX93	Palladin (SIH002) (Sarcoma antigen NY-SAR-77)	0.021969	3	0.332857	79.837	TTSVSLTIGSSSPK	391	T	yes
Q8WXI9	Transcriptional repressor p66-beta (GATA zinc finger domain-containing protein 2B) (p66/p68)	0.0011697	3	0.999994	122.18	SISQSISGQK	584	S	yes
Q8WXI9	Transcriptional repressor p66-beta (GATA zinc finger domain-containing protein 2B) (p66/p68)	0.70981	2	0.977518	55.899	SISQSISGQK	586	S	yes
Q8WY36	HMG box transcription factor BBX (Bobby sox homolog) (HMG box-containing protein 2)	1.7548	2	1	114.89	GSILDAK	520	S	yes
Q8WYA6	Beta-catenin-like protein 1 (Nuclear-associated protein) (NAP) (Testis development protein NYD-SP19)	1.7329	2	0.999916	72.2	FTENDSEK	431	T	yes
Q8WYA6	Beta-catenin-like protein 1 (Nuclear-associated protein) (NAP) (Testis development protein NYD-SP19)	1.8705	3	0.989687	54.253	EHEEHVCSILASLLR	409	S	yes
Q8WYP5	Protein ELYS (Embryonic large molecule derived from yolk sac) (Protein MEL-28) (Putative AT-hook-containing transcription factor 1)	2.8783	3	0.5	89.369	QKNTSNK	2166	S	yes
Q8WYP5	Protein ELYS (Embryonic large molecule derived from yolk sac) (Protein MEL-28) (Putative AT-hook-containing transcription factor 1)	2.8783	3	0.5	89.369	QKNTSNK	2165	T	yes
Q8WZ42	Titin (EC 2.7.11.1) (Connectin) (Rhabdomyosarcoma antigen MU-RMS-40.14)	2.084	2	1	79.23	EGTGPIFIK	3501	T	yes
Q8WZ42	Titin (EC 2.7.11.1) (Connectin) (Rhabdomyosarcoma antigen MU-RMS-40.14)	4.534	2	1	71.601	FVAEEKLSFAVPQR	10402	S	yes
Q8WZ42	Titin (EC 2.7.11.1) (Connectin) (Rhabdomyosarcoma antigen MU-RMS-40.14)	3.4904	3	1	69.314	VKGTDQVLVKK	32214	T	yes
Q8WZ42	Titin (EC 2.7.11.1) (Connectin) (Rhabdomyosarcoma antigen MU-RMS-40.14)	1.0637	4	1	66.595	AKEQETILRTR	671	T	yes
Q8WZ42	Titin (EC 2.7.11.1) (Connectin) (Rhabdomyosarcoma antigen MU-RMS-40.14)	2.3071	3	1	51.335	VSAVNHYGK	21474	S	yes
Q8WZ42	Titin (EC 2.7.11.1) (Connectin) (Rhabdomyosarcoma antigen MU-RMS-40.14)	1.6905	2	0.995728	41.996	DGRELSADSK	7613	S	yes
Q92540	Protein SMG7 (EST1-like protein C) (SMG-7 homolog) (hSMG-7)	0.078189	2,3	0.999999	120.45	KTPVSEAR	627	S	yes
Q92569	Phosphatidylinositol 3-kinase regulatory subunit gamma (PI3-kinase regulatory subunit gamma) (PI3K regulatory subunit gamma) (PtdIns-3-kinase regulatory subunit gamma) (Phosphatidylinositol 3-kinase 55 kDa regulatory subunit gamma) (PI3-kinase subunit p55-gamma) (PtdIns-3-kinase regulatory subunit p55-gamma) (p55PIK)	0.24561	3	1	72.29	LDVKLMYPVSR	161	S	yes
Q92570	Nuclear receptor subfamily 4 group A member 3 (Mitogen-induced nuclear orphan receptor) (Neuron-derived orphan receptor 1) (Nuclear hormone receptor NOR-1)	4.4767	3	0.998103	111.5	LSIRSNTAEDK	488	T	yes
Q92576	PHD finger protein 3	2.0375	3	0.991029	60.788	SVKSKHTK	488	S	yes
Q92576	PHD finger protein 3	1.6161	6	0.819291	47.808	STSPRTSTNFSPMRPQQPNLQHLK	1786	S	yes
Q92576	PHD finger protein 3	1.6161	6	0.204528	47.808	STSPRTSTNFSPMRPQQPNLQHLK	1788	S	yes
Q92576	PHD finger protein 3	1.6161	6	0.204528	47.808	STSPRTSTNFSPMRPQQPNLQHLK	1792	S	yes
Q92576	PHD finger protein 3	1.6161	6	0.204528	47.808	STSPRTSTNFSPMRPQQPNLQHLK	1796	S	yes
Q92576	PHD finger protein 3	1.6161	6	0.204528	47.808	STSPRTSTNFSPMRPQQPNLQHLK	1791	T	yes
Q92576	PHD finger protein 3	1.6161	6	0.204528	47.808	STSPRTSTNFSPMRPQQPNLQHLK	1793	T	yes
Q92576	PHD finger protein 3	0.25631	3	0.991987	47.039	TKVNVKSVK	527	S	yes
Q92597	Protein NDRG1 (Differentiation-related gene 1 protein) (DRG-1) (N-myc downstream-regulated gene 1 protein) (Nickel-specific induction protein Cap43) (Reducing agents and tunicamycin-responsive protein) (RTP) (Rit42)	0.25353	2	0.868938	40.715	SRSHTSEGTR	347;357	S	yes
Q92610	Zinc finger protein 592	3.5428	3	0.999897	85.493	VPKGAAPGSQTGK	477	S	yes
Q92625	Ankyrin repeat and SAM domain-containing protein 1A (Odin)	1.9071	3	0.499994	99.834	KSESLSNCSIGK	648	S	yes
Q92625	Ankyrin repeat and SAM domain-containing protein 1A (Odin)	1.9071	3	0.499994	99.834	KSESLSNCSIGK	646	S	yes
Q92733	Proline-rich protein PRCC (Papillary renal cell carcinoma translocation-associated gene protein)	0.096289	3	0.996195	131.4	TSSLAPVVGTTTTTPSPSAIK	226	T	yes
Q92733	Proline-rich protein PRCC (Papillary renal cell carcinoma translocation-associated gene protein)	0.84763	2,3	0.955905	51.276	NTWSENKLSR	476	S	yes
Q92766	Ras-responsive element-binding protein 1 (RREB-1) (Finger protein in nuclear bodies) (Raf-responsive zinc finger protein LZ321) (Zinc finger motif enhancer-binding protein 1) (Zep-1)	3.5002	3	1	91.906	HMLVHSGER	120	S	yes
Q92766	Ras-responsive element-binding protein 1 (RREB-1) (Finger protein in nuclear bodies) (Raf-responsive zinc finger protein LZ321) (Zinc finger motif enhancer-binding protein 1) (Zep-1)	3.0977	3	0.996621	41.448	RFWSLQDLTR	1528	T	yes
Q92769	Histone deacetylase 2 (HD2) (EC 3.5.1.98)	1.2503	2	0.999999	82.645	ISIRASDK	407	S	yes
Q92769	Histone deacetylase 2 (HD2) (EC 3.5.1.98)	0.10068	3	0.998743	52.725	ETEDKKTDVK	459	T	yes
Q92782	Zinc finger protein neuro-d4 (BRG1-associated factor 45B) (BAF45B) (D4, zinc and double PHD fingers family 1)	3.773	3	0.999869	57.559	ASAYITLT	380	T	yes
Q92782	Zinc finger protein neuro-d4 (BRG1-associated factor 45B) (BAF45B) (D4, zinc and double PHD fingers family 1)	1.6972	3	0.999831	51.445	ASAYITLT	374	S	yes
Q92797	Symplekin	0.15691	2	0.989617	63.184	ASGSGDSVTR	3	S	yes
Q92797	Symplekin	4.8994	3	0.69649	49.482	MASGSGDSVTR	3	S	yes
Q92797	Symplekin	0.092399	2	0.765653	46.706	MASGSGDSVTR	8	S	yes
Q92819	Hyaluronan synthase 2 (EC 2.4.1.212) (Hyaluronate synthase 2) (Hyaluronic acid synthase 2) (HA synthase 2)	0.6976	3	1	70.028	SICIMQK	180	S	yes
Q92819	Hyaluronan synthase 2 (EC 2.4.1.212) (Hyaluronate synthase 2) (Hyaluronic acid synthase 2) (HA synthase 2)	1.7354	3	1	43.316	SICIMQKWGGK	180	S	yes
Q92830	Histone acetyltransferase KAT2A (EC 2.3.1.48) (General control of amino acid synthesis protein 5-like 2) (Histone acetyltransferase GCN5) (hGCN5) (Histone succinyltransferase KAT2A) (EC 2.3.1.-) (Lysine acetyltransferase 2A) (STAF97)	1.7577	2	1	60.973	KDETARLEER	490	T	yes
Q92841	Probable ATP-dependent RNA helicase DDX17 (EC 3.6.4.13) (DEAD box protein 17) (DEAD box protein p72) (DEAD box protein p82) (RNA-dependent helicase p72)	2.2814	3	1	43.042	PEPQALPSPAIR	64	S	yes
Q92859	Neogenin (Immunoglobulin superfamily DCC subclass member 2)	0.14348	4	0.757917	41.53	SPDPNPIMTDTPIPR	1178	S	yes
Q92878	DNA repair protein RAD50 (hRAD50) (EC 3.6.-.-)	2.5615	5	0.999516	66.636	RQQLEEQTVELSTEVQSLYR	900	S	yes
Q92985	Interferon regulatory factor 7 (IRF-7)	4.4361	3	1	40.352	TNFRCALR	93	T	yes
Q92997	Segment polarity protein dishevelled homolog DVL-3 (Dishevelled-3) (DSH homolog 3)	3.2882	3	0.499026	65.092	SSGSNRSGSDR	576	S	yes
Q92997	Segment polarity protein dishevelled homolog DVL-3 (Dishevelled-3) (DSH homolog 3)	3.2882	3	0.499026	65.092	SSGSNRSGSDR	575	S	yes
Q93099	Homogentisate 1,2-dioxygenase (EC 1.13.11.5) (Homogentisate oxygenase) (Homogentisic acid oxidase) (Homogentisicase)	0.7678	2	1	77.318	WGLKASR	416	S	yes
Q969H0	F-box/WD repeat-containing protein 7 (Archipelago homolog) (hAgo) (F-box and WD-40 domain-containing protein 7) (F-box protein FBX30) (SEL-10) (hCdc4)	0.86715	3	0.984842	86.014	SFSLGKKPCK	180	S	yes
Q969H0	F-box/WD repeat-containing protein 7 (Archipelago homolog) (hAgo) (F-box and WD-40 domain-containing protein 7) (F-box protein FBX30) (SEL-10) (hCdc4)	0.86715	3	0.5	86.014	SFSLGKKPCK	182	S	yes
Q969P6	DNA topoisomerase I, mitochondrial (TOP1mt) (EC 5.99.1.2)	2.0224	3	0.998984	70.808	TQKGSGAR	34	T	yes
Q969Q1	E3 ubiquitin-protein ligase TRIM63 (EC 2.3.2.27) (Iris RING finger protein) (Muscle-specific RING finger protein 1) (MuRF-1) (MuRF1) (RING finger protein 28) (RING-type E3 ubiquitin transferase TRIM63) (Striated muscle RING zinc finger protein) (Tripartite motif-containing protein 63)	0.56283	3	0.999618	94.692	SIVEASKGCQLGK	290	S	yes
Q969R5	Lethal(3)malignant brain tumor-like protein 2 (H-l(3)mbt-like protein 2) (L(3)mbt-like protein 2)	5.622	3	0.999598	58.246	EAFFSKTK	106	T	yes
Q969T7	7-methylguanosine phosphate-specific 5'-nucleotidase (7-methylguanosine nucleotidase) (EC 3.1.3.91) (Cytosolic 5'-nucleotidase 3B) (Cytosolic 5'-nucleotidase III-like protein) (cN-III-like protein) (EC 3.1.3.5) (N(7)-methylguanylate 5'-phosphatase)	1.3286	3	0.999194	84.687	KAEEVSTLMK	8	T	yes
Q969V4	Tektin-1	0.16876	3	0.876538	80.318	ILSQTANDLR	249	T	yes
Q96A44	SPRY domain-containing SOCS box protein 4 (SSB-4)	0.71184	2,3	0.949171	54.09	HPVAQSTDGIR	83	T	yes
Q96A44	SPRY domain-containing SOCS box protein 4 (SSB-4)	0.71184	2,3	0.5	46.069	HPVAQSTDGIR	84	S	yes
Q96AQ1	Coiled-coil domain-containing protein 74A	1.4197	2	0.983353	48.608	KSGAGVAAGTR	11	T	yes
Q96AQ1	Coiled-coil domain-containing protein 74A	3.3366	3	0.999482	41.08	SGAGVAAGTR	2	S	yes
Q96B18	Dapper homolog 3 (Antagonist of beta-catenin Dapper homolog 3) (Arginine-rich region 1 protein) (Dapper antagonist of catenin 3)	3.1967	3	0.837816	57.267	ASRSQSETSLLGR	424	S	yes
Q96B18	Dapper homolog 3 (Antagonist of beta-catenin Dapper homolog 3) (Arginine-rich region 1 protein) (Dapper antagonist of catenin 3)	3.1967	3	0.989134	57.267	ASRSQSETSLLGR	429	S	yes
Q96BJ8	Engulfment and cell motility protein 3	0.29431	2	0.999999	90.827	NAPSAYSR	380	S	yes
Q96BJ8	Engulfment and cell motility protein 3	0.121	3	1	43.512	LVPLASDMIFAR	112	S	yes
Q96BK5	PIN2/TERF1-interacting telomerase inhibitor 1 (Liver-related putative tumor suppressor) (Pin2-interacting protein X1) (Protein 67-11-3) (TRF1-interacting protein 1)	3.1385	2	0.995894	51.276	GKDLSSR	137	S	yes
Q96BT1	Putative uncharacterized protein C3orf49	1.8197	2	0.961037	52.725	SDLTVGK	218	S	yes
Q96BY6	Dedicator of cytokinesis protein 10 (Zizimin-3)	3.3894	4	0.999999	84.687	PLSLIGSTLR	1318	S	yes
Q96BY6	Dedicator of cytokinesis protein 10 (Zizimin-3)	0.085928	4	0.997114	49.149	RGVDQTCTRVISK	2169	S	yes
Q96CV9	Optineurin (E3-14.7K-interacting protein) (FIP-2) (Huntingtin yeast partner L) (Huntingtin-interacting protein 7) (HIP-7) (Huntingtin-interacting protein L) (NEMO-related protein) (Optic neuropathy-inducing protein) (Transcription factor IIIA-interacting protein) (TFIIIA-IntP)	0.56565	2	0.830147	51.727	TVSTGTALSK	206	S	yes
Q96DB5	Regulator of microtubule dynamics protein 1 (RMD-1) (hRMD-1) (Protein FAM82B)	1.192	2	0.843272	49.189	LPAGTSGSR	30	S	yes
Q96DT6	Cysteine protease ATG4C (EC 3.4.22.-) (AUT-like 3 cysteine endopeptidase) (Autophagin-3) (Autophagy-related cysteine endopeptidase 3) (Autophagy-related protein 4 homolog C)	1.7091	3	0.477343	60.518	YSWVLKTKTYFSR	31	S	yes
Q96DT6	Cysteine protease ATG4C (EC 3.4.22.-) (AUT-like 3 cysteine endopeptidase) (Autophagin-3) (Autophagy-related cysteine endopeptidase 3) (Autophagy-related protein 4 homolog C)	1.7091	3	0.477343	60.518	YSWVLKTKTYFSR	26	T	yes
Q96DY2	Dynein regulatory complex protein 10 (IQ domain-containing protein D)	1.3236	3	1	95.183	DKAQFLQDISR	216	S	yes
Q96DY7	Mdm2-binding protein (hMTBP)	1.6711	3	0.647041	88.948	ESRSQKHTR	831	T	yes
Q96E11	Ribosome-recycling factor, mitochondrial (RRF) (Ribosome-releasing factor, mitochondrial)	4.0827	3	0.983249	41.109	TNSMNKLK	213	T	yes
Q96EF0	Myotubularin-related protein 8 (EC 3.1.3.-)	3.6146	3	0.823084	45.357	SSKEMRESGWK	119	S	yes
Q96EG3	Zinc finger protein 837	0.11934	3	0.999999	80.014	TPKPTSRGR	182	T	yes
Q96EH5	60S ribosomal protein L39-like (60S ribosomal protein L39-2) (Large ribosomal subunit protein eL39-like)	0.04696	3	0.499999	83.005	MSSHKTFTIKR	6	T	yes
Q96EH5	60S ribosomal protein L39-like (60S ribosomal protein L39-2) (Large ribosomal subunit protein eL39-like)	0.04696	3	0.499999	83.005	MSSHKTFTIKR	8	T	yes
Q96G42	Kelch domain-containing protein 7B	2.2749	3	1	61.11	EKSLDPLPQAAMPR	91	S	yes
Q96GD3	Polycomb protein SCMH1 (Sex comb on midleg homolog 1)	3.1776	3	1	47.187	GVLKGSNER	555	S	yes
Q96GM8	Target of EGR1 protein 1	3.0339	3	1	92.051	SLLNQCIEER	75	S	yes
Q96HA7	Tonsoku-like protein (Inhibitor of kappa B-related protein) (I-kappa-B-related protein) (IkappaBR) (NF-kappa-B inhibitor-like protein 2) (Nuclear factor of kappa light polypeptide gene enhancer in B-cells inhibitor-like 2)	0.3875	3	1	42.718	SLERELR	2	S	yes
Q96HW7	Integrator complex subunit 4 (Int4)	1.37	3	1	105.25	LLSDDYEQVR	242	S	yes
Q96I59	Probable asparagine--tRNA ligase, mitochondrial (EC 6.1.1.22) (Asparaginyl-tRNA synthetase) (AsnRS)	2.6949	4	0.999912	50.354	HKPSAKLSVR	29	S	yes
Q96IV0	Peptide-N(4)-(N-acetyl-beta-glucosaminyl)asparagine amidase (PNGase) (hPNGase) (EC 3.5.1.52) (N-glycanase 1) (Peptide:N-glycanase)	4.9579	3	0.735356	42.109	SSRLDGSNK	116	S	yes
Q96IZ5	RNA-binding protein 41 (RNA-binding motif protein 41)	3.5457	2	0.883835	52.255	SHVSGEK	103	S	yes
Q96IZ5	RNA-binding protein 41 (RNA-binding motif protein 41)	5.4341	4	0.920379	41.427	SHVSGEK	100	S	yes
Q96JE9	Microtubule-associated protein 6 (MAP-6) (Stable tubule-only polypeptide) (STOP)	2.5187	3	0.499578	46.994	PSVQSSK	381	S	yes
Q96JE9	Microtubule-associated protein 6 (MAP-6) (Stable tubule-only polypeptide) (STOP)	2.5187	3	0.499578	46.994	PSVQSSK	382	S	yes
Q96JG9	Zinc finger protein 469	0.8302	4	0.836871	62.287	GPSSGHPLKSK	880	S	yes
Q96JM2	Zinc finger protein 462	1.2001	3	1	104.75	HCPYINTR	1525	T	yes
Q96JM2	Zinc finger protein 462	5.587	2	1	103.43	SMVKILSSLR	268	S	yes
Q96JM2	Zinc finger protein 462	0.83669	4	1	60.518	KGIVSHYMKR	1784	S	yes
Q96K83	Zinc finger protein 521 (Early hematopoietic zinc finger protein) (LYST-interacting protein 3)	1.6259	3	0.849545	65.295	ISPSQSDEKK	1185	S	yes
Q96KJ9	Cytochrome c oxidase subunit 4 isoform 2, mitochondrial (Cytochrome c oxidase subunit IV isoform 2) (COX IV-2)	0.38881	3	0.499942	86.114	KGMHSSEGTTR	29	T	yes
Q96KJ9	Cytochrome c oxidase subunit 4 isoform 2, mitochondrial (Cytochrome c oxidase subunit IV isoform 2) (COX IV-2)	0.38881	3	0.499942	86.114	KGMHSSEGTTR	28	T	yes
Q96KM6	Zinc finger protein 512B	1.5916	3	0.979927	64.73	ATGRNSGKK	337	T	yes
Q96KR1	Zinc finger RNA-binding protein (hZFR) (M-phase phosphoprotein homolog)	0.00032951	3	1	160.09	AGYSQGATQYTQAQQTR	195	S	yes
Q96KR1	Zinc finger RNA-binding protein (hZFR) (M-phase phosphoprotein homolog)	0.20576	3	0.99113	133.42	STAPAVAYDSK	148	S	yes
Q96KR1	Zinc finger RNA-binding protein (hZFR) (M-phase phosphoprotein homolog)	0.2351	3	0.806704	84.734	STAPAVAYDSK	149	T	yes
Q96KW2	POM121-like protein 2	5.9207	3	0.658772	42.947	RSLHSWGSDHSLTK	224	S	yes
Q96L73	Histone-lysine N-methyltransferase, H3 lysine-36 and H4 lysine-20 specific (EC 2.1.1.43) (Androgen receptor coactivator 267 kDa protein) (Androgen receptor-associated protein of 267 kDa) (H3-K36-HMTase) (H4-K20-HMTase) (Lysine N-methyltransferase 3B) (Nuclear receptor-binding SET domain-containing protein 1) (NR-binding SET domain-containing protein)	2.0602	3	1	72.29	LRDAFSAQMVK	1035	S	yes
Q96L73	Histone-lysine N-methyltransferase, H3 lysine-36 and H4 lysine-20 specific (EC 2.1.1.43) (Androgen receptor coactivator 267 kDa protein) (Androgen receptor-associated protein of 267 kDa) (H3-K36-HMTase) (H4-K20-HMTase) (Lysine N-methyltransferase 3B) (Nuclear receptor-binding SET domain-containing protein 1) (NR-binding SET domain-containing protein)	0.016957	3	0.993488	67.993	SDCVTRR	1017	T	yes
Q96LI9	Putative uncharacterized protein CXorf58	5.7314	2	0.991527	41.427	TGPSGTK	317	T	yes
Q96LL4	Uncharacterized protein C8orf48	2.5482	2	0.849653	48.602	TTPKQEAAAK	184	T	yes
Q96LW1	Zinc finger protein 354B	3.3227	3	1	72.34	IHIEEDSLK	605	S	yes
Q96LW4	DNA-directed primase/polymerase protein (hPrimpol1) (EC 2.7.7.-) (Coiled-coil domain-containing protein 111)	3.6074	3	0.998071	80.706	KPLSSVYR	25	S	yes
Q96M02	Centrosomal protein C10orf90 (Fragile-site associated tumor suppressor homolog)	0.05963	3	1	91.087	CISEKEMHMR	644	S	yes
Q96M29	Tektin-5	1.1946	3,4	0.999884	65.179	HSQNMRANSIQLR	306	S	yes
Q96M29	Tektin-5	1.3686	3	0.990735	54.09	KTFPCTPRLVGHT	474	T	yes
Q96M83	Coiled-coil domain-containing protein 7 (Protein BIOT2)	0.49493	3,4	0.998774	96.756	EKTKPTNNR	333	T	yes
Q96M91	Cilia- and flagella-associated protein 53 (Coiled-coil domain-containing protein 11)	3.5061	3	0.976291	46.352	AKQETRTILQK	286	T	yes
Q96ME7	Zinc finger protein 512	5.5561	3	1	55.314	CGKGAAELEKMTLK	286	T	yes
Q96MH7	Uncharacterized protein C5orf34	1.6543	3	0.891691	73.885	ESLIPSVGR	455	S	yes
Q96MK2	RIPOR family member 3	0.65512	2	0.983879	54.539	MPAKSSK	53	S	yes
Q96MU7	YTH domain-containing protein 1 (Splicing factor YT521) (YT521-B)	4.1263	2	0.999987	53.166	SVILIFSVR	396	S	yes
Q96MY7	Protein FAM161B	4.7982	3	0.999851	46.178	DPEQGLEGSLEQPASPR	621	S	yes
Q96N46	Tetratricopeptide repeat protein 14 (TPR repeat protein 14)	1.9375	2	0.498891	50.034	EHSESSVK	740	S	yes
Q96N46	Tetratricopeptide repeat protein 14 (TPR repeat protein 14)	1.9375	2	0.498891	50.034	EHSESSVK	741	S	yes
Q96N64	PWWP domain-containing protein 2A	1.3836	3	0.756667	96.82	NESVTTVNKKLK	357	S	yes
Q96NJ6	Zinc finger protein 3 homolog (Zfp-3) (Zinc finger protein 752)	3.4268	3	0.9994	42.809	KTFGTNSSLR	177	T	yes
Q96NJ6	Zinc finger protein 3 homolog (Zfp-3) (Zinc finger protein 752)	1.4076	2	0.987652	40.725	TFGTNSSLR	177	T	yes
Q96P09	Baculoviral IAP repeat-containing protein 8 (Inhibitor of apoptosis-like protein 2) (IAP-like protein 2) (ILP-2) (Testis-specific inhibitor of apoptosis)	4.7539	2	0.499996	55.353	SLEGALVQTTK	94	T	yes
Q96P09	Baculoviral IAP repeat-containing protein 8 (Inhibitor of apoptosis-like protein 2) (IAP-like protein 2) (ILP-2) (Testis-specific inhibitor of apoptosis)	4.7539	2	0.499996	55.353	SLEGALVQTTK	95	T	yes
Q96PF2	Testis-specific serine/threonine-protein kinase 2 (TSK-2) (TSK2) (TSSK-2) (Testis-specific kinase 2) (EC 2.7.11.1) (DiGeorge syndrome protein G) (DGS-G) (Serine/threonine-protein kinase 22B)	0.1234	3	1	104.2	VKSAYSER	28	S	yes
Q96PF2	Testis-specific serine/threonine-protein kinase 2 (TSK-2) (TSK2) (TSSK-2) (Testis-specific kinase 2) (EC 2.7.11.1) (DiGeorge syndrome protein G) (DGS-G) (Serine/threonine-protein kinase 22B)	0.6898	2	0.99623	45.077	VKSAYSER	28	S	yes
Q96PN6	Adenylate cyclase type 10 (EC 4.6.1.1) (AH-related protein) (Adenylate cyclase homolog) (Germ cell soluble adenylyl cyclase) (hsAC) (sAC) (Testicular soluble adenylyl cyclase)	3.7229	2	1	41.109	VMTLLDEK	586	T	yes
Q96PY5	Formin-like protein 2 (Formin homology 2 domain-containing protein 2)	1.0423	3	0.999976	92.439	RTLKNSR	212	S	yes
Q96PY5	Formin-like protein 2 (Formin homology 2 domain-containing protein 2)	3.3036	3	1	45.864	ELQRGMDLTKR	913	T	yes
Q96PZ0	Pseudouridylate synthase 7 homolog (EC 5.4.99.-)	0.45587	3	0.999961	67.234	MEMTEMTGVSLKR	4	T	yes
Q96Q06	Perilipin-4 (Adipocyte protein S3-12)	4.7386	3	0.499968	62.203	AKDAVSSGVASVVDVAK	93	S	yes
Q96Q06	Perilipin-4 (Adipocyte protein S3-12)	4.7386	3	0.499968	62.203	AKDAVSSGVASVVDVAK	94	S	yes
Q96Q06	Perilipin-4 (Adipocyte protein S3-12)	1.823	3	0.901605	41.283	SVLTGTK	484;748;880	T	yes
Q96Q15	Serine/threonine-protein kinase SMG1 (SMG-1) (hSMG-1) (EC 2.7.11.1) (61E3.4) (Lambda/iota protein kinase C-interacting protein) (Lambda-interacting protein)	4.5262	4	0.999879	46.994	SVACSPK	3584	S	yes
Q96Q89	Kinesin-like protein KIF20B (Cancer/testis antigen 90) (CT90) (Kinesin family member 20B) (Kinesin-related motor interacting with PIN1) (M-phase phosphoprotein 1) (MPP1)	5.9593	2	0.999998	75.738	LSNVEASK	1766	S	yes
Q96Q89	Kinesin-like protein KIF20B (Cancer/testis antigen 90) (CT90) (Kinesin family member 20B) (Kinesin-related motor interacting with PIN1) (M-phase phosphoprotein 1) (MPP1)	0.62471	5	0.998876	49.595	LTHYFQSFFNGK	442	S	yes
Q96QB1	Rho GTPase-activating protein 7 (Deleted in liver cancer 1 protein) (DLC-1) (HP protein) (Rho-type GTPase-activating protein 7) (START domain-containing protein 12) (StARD12) (StAR-related lipid transfer protein 12)	2.5991	3	1	82.707	RWSRLEEFDVFSPK	548	S	yes
Q96QE3	ATPase family AAA domain-containing protein 5 (Chromosome fragility-associated gene 1 protein)	0.27802	3	0.980722	87.719	ISSPKKVVTSPR	1214	S	yes
Q96QE5	Transcription elongation factor, mitochondrial	3.8895	4	0.856751	49.149	STVQVCNSILCPK	125	S	yes
Q96QF7	Acidic repeat-containing protein (Germ cell nuclear antigen)	0.32002	3	0.774258	65.719	TRIGCYTKSLDTSR	659	S	yes
Q96QF7	Acidic repeat-containing protein (Germ cell nuclear antigen)	1.4825	3	0.499839	45.723	IGCYTKSLDTSR	662	T	yes
Q96QZ7	Membrane-associated guanylate kinase, WW and PDZ domain-containing protein 1 (Atrophin-1-interacting protein 3) (AIP-3) (BAI1-associated protein 1) (BAP-1) (Membrane-associated guanylate kinase inverted 1) (MAGI-1) (Trinucleotide repeat-containing gene 19 protein) (WW domain-containing protein 3) (WWP3)	2.6282	3	0.999155	89.403	KSADNTLER	1362	S	yes
Q96RD6	Pannexin-2	2.9614	2	1	42.338	LPSVQLQR	283	S	yes
Q96RN5	Mediator of RNA polymerase II transcription subunit 15 (Activator-recruited cofactor 105 kDa component) (ARC105) (CTG repeat protein 7a) (Mediator complex subunit 15) (Positive cofactor 2 glutamine/Q-rich-associated protein) (PC2 glutamine/Q-rich-associated protein) (TPA-inducible gene 1 protein) (TIG-1) (Trinucleotide repeat-containing gene 7 protein)	0.90537	3	1	79.906	TLQKCEIALEK	584	T	yes
Q96RN5	Mediator of RNA polymerase II transcription subunit 15 (Activator-recruited cofactor 105 kDa component) (ARC105) (CTG repeat protein 7a) (Mediator complex subunit 15) (Positive cofactor 2 glutamine/Q-rich-associated protein) (PC2 glutamine/Q-rich-associated protein) (TPA-inducible gene 1 protein) (TIG-1) (Trinucleotide repeat-containing gene 7 protein)	1.6025	3	0.999888	51.727	DVSGQETDWR	4	S	yes
Q96S07	Proline-rich protein 25	3.8185	2,3	1	51.276	RTAPPRR	347	T	yes
Q96SB8	Structural maintenance of chromosomes protein 6 (SMC protein 6) (SMC-6) (hSMC6)	0.14794	3	0.785411	77.185	SATGSVVSTR	158	S	yes
Q96SB8	Structural maintenance of chromosomes protein 6 (SMC protein 6) (SMC-6) (hSMC6)	3.4858	2	0.840859	44.425	SATGSVVSTR	165	S	yes
Q96ST2	Protein IWS1 homolog (IWS1-like protein)	5.681	4	0.981445	42.708	HKQKPESDDDSDR	333	S	yes
Q96T23	Remodeling and spacing factor 1 (Rsf-1) (HBV pX-associated protein 8) (Hepatitis B virus X-associated protein) (p325 subunit of RSF chromatin-remodeling complex)	0.79695	2	0.499995	80.755	STLESEK	614	T	yes
Q96T51	RUN and FYVE domain-containing protein 1 (FYVE-finger protein EIP1) (La-binding protein 1) (Rab4-interacting protein) (Zinc finger FYVE domain-containing protein 12)	1.3896	3	0.978056	71.153	SEKSVEITK	371	S	yes
Q96T58	Msx2-interacting protein (SMART/HDAC1-associated repressor protein) (SPEN homolog)	2.1843	4	0.998242	59.265	LAVDKSASLK	2092	S	yes
Q96T58	Msx2-interacting protein (SMART/HDAC1-associated repressor protein) (SPEN homolog)	1.2213	4	0.499771	50.053	VTSVQIHGTSEER	367	S	yes
Q99424	Peroxisomal acyl-coenzyme A oxidase 2 (EC 1.17.99.3) (3-alpha,7-alpha,12-alpha-trihydroxy-5-beta-cholestanoyl-CoA 24-hydroxylase) (3-alpha,7-alpha,12-alpha-trihydroxy-5-beta-cholestanoyl-CoA oxidase) (Trihydroxycoprostanoyl-CoA oxidase) (THCA-CoA oxidase) (THCCox)	1.0333	3	1	71.221	GFTEALEK	556	T	yes
Q99543	DnaJ homolog subfamily C member 2 (M-phase phosphoprotein 11) (Zuotin-related factor 1) [Cleaved into: DnaJ homolog subfamily C member 2, N-terminally processed]	2.9576	3	1	65.305	YKATQRQIK	103	T	yes
Q99550	M-phase phosphoprotein 9	0.10034	4	0.906694	71.296	IEEMRTSSK	701	T	yes
Q99590	Protein SCAF11 (CTD-associated SR protein 11) (Renal carcinoma antigen NY-REN-40) (SC35-interacting protein 1) (SR-related and CTD-associated factor 11) (SRSF2-interacting protein) (Serine/arginine-rich splicing factor 2-interacting protein) (Splicing factor, arginine/serine-rich 2-interacting protein) (Splicing regulatory protein 129) (SRrp129)	3.2617	4	0.996984	74.533	RSESLSPRR	882	S	yes
Q99590	Protein SCAF11 (CTD-associated SR protein 11) (Renal carcinoma antigen NY-REN-40) (SC35-interacting protein 1) (SR-related and CTD-associated factor 11) (SRSF2-interacting protein) (Serine/arginine-rich splicing factor 2-interacting protein) (Splicing factor, arginine/serine-rich 2-interacting protein) (Splicing regulatory protein 129) (SRrp129)	1.0301	2	0.998095	45.723	ASNAAVKLAESK	1349	S	yes
Q99590	Protein SCAF11 (CTD-associated SR protein 11) (Renal carcinoma antigen NY-REN-40) (SC35-interacting protein 1) (SR-related and CTD-associated factor 11) (SRSF2-interacting protein) (Serine/arginine-rich splicing factor 2-interacting protein) (Splicing factor, arginine/serine-rich 2-interacting protein) (Splicing regulatory protein 129) (SRrp129)	2.8701	3	0.988795	42.336	RETSRENK	887	T	yes
Q99607	ETS-related transcription factor Elf-4 (E74-like factor 4) (Myeloid Elf-1-like factor)	3.2271	2	0.999998	96.756	ASREESAKK	167	S	yes
Q99607	ETS-related transcription factor Elf-4 (E74-like factor 4) (Myeloid Elf-1-like factor)	0.82732	4	0.952058	40.857	TSSRVSSRSAPQGK	330	T	yes
Q99623	Prohibitin-2 (B-cell receptor-associated protein BAP37) (D-prohibitin) (Repressor of estrogen receptor activity)	1.4421	3	0.848544	49.189	KISSPTGSK	96	S	yes
Q99717	Mothers against decapentaplegic homolog 5 (MAD homolog 5) (Mothers against DPP homolog 5) (JV5-1) (SMAD family member 5) (SMAD 5) (Smad5) (hSmad5)	0.096597	3	1	89.46	WPDLQSHHELK	100	S	yes
Q99728	BRCA1-associated RING domain protein 1 (BARD-1) (EC 2.3.2.27) (RING-type E3 ubiquitin transferase BARD1)	1.446	2	0.999989	57.267	QLDSMIQLCSKLR	103	S	yes
Q99996	A-kinase anchor protein 9 (AKAP-9) (A-kinase anchor protein 350 kDa) (AKAP 350) (hgAKAP 350) (A-kinase anchor protein 450 kDa) (AKAP 450) (AKAP 120-like protein) (Centrosome- and Golgi-localized PKN-associated protein) (CG-NAP) (Protein hyperion) (Protein kinase A-anchoring protein 9) (PRKA9) (Protein yotiao)	0.5154	3	0.499642	56.547	HTTYRSR	3833	T	yes
Q99996	A-kinase anchor protein 9 (AKAP-9) (A-kinase anchor protein 350 kDa) (AKAP 350) (hgAKAP 350) (A-kinase anchor protein 450 kDa) (AKAP 450) (AKAP 120-like protein) (Centrosome- and Golgi-localized PKN-associated protein) (CG-NAP) (Protein hyperion) (Protein kinase A-anchoring protein 9) (PRKA9) (Protein yotiao)	0.5154	3	0.499642	56.547	HTTYRSR	3834	T	yes
Q9BPX5	Actin-related protein 2/3 complex subunit 5-like protein (Arp2/3 complex 16 kDa subunit 2) (ARC16-2)	2.3225	3	0.981877	71.877	ARNTLSSR	7	S	yes
Q9BPZ7	Target of rapamycin complex 2 subunit MAPKAP1 (TORC2 subunit MAPKAP1) (Mitogen-activated protein kinase 2-associated protein 1) (Stress-activated map kinase-interacting protein 1) (SAPK-interacting protein 1) (mSIN1)	0.58906	3	0.999894	59.185	NSKQSAQELK	113	S	yes
Q9BPZ7	Target of rapamycin complex 2 subunit MAPKAP1 (TORC2 subunit MAPKAP1) (Mitogen-activated protein kinase 2-associated protein 1) (Stress-activated map kinase-interacting protein 1) (SAPK-interacting protein 1) (mSIN1)	1.149	3	1	57.598	QSAQELK	116	S	yes
Q9BPZ7	Target of rapamycin complex 2 subunit MAPKAP1 (TORC2 subunit MAPKAP1) (Mitogen-activated protein kinase 2-associated protein 1) (Stress-activated map kinase-interacting protein 1) (SAPK-interacting protein 1) (mSIN1)	3.2091	2	0.973857	42.809	NSKQSAQELK	116	S	yes
Q9BQ52	Zinc phosphodiesterase ELAC protein 2 (EC 3.1.26.11) (ElaC homolog protein 2) (Heredity prostate cancer protein 2) (Ribonuclease Z 2) (RNase Z 2) (tRNA 3 endonuclease 2) (tRNase Z 2)	4.8545	3	1	43.635	MWALCSLLR	6	S	yes
Q9BQF6	Sentrin-specific protease 7 (EC 3.4.22.-) (SUMO-1-specific protease 2) (Sentrin/SUMO-specific protease SENP7)	0.40032	4	1	61.11	TLPRNDANLCDANK	116	T	yes
Q9BQI6	SMC5-SMC6 complex localization factor protein 1 (Ankyrin repeat domain-containing protein 32) (BRCT domain-containing protein 1) (Smc5/6 localization factor 1)	0.27829	2	1	126.31	TLLMLNGTK	750	T	yes
Q9BR76	Coronin-1B (Coronin-2)	3.1256	3	1	113.07	GLEVSKCEIAR	330	S	yes
Q9BR76	Coronin-1B (Coronin-2)	1.8453	3	1	43.594	GMGSMPKRGLEVSK	330	S	yes
Q9BR76	Coronin-1B (Coronin-2)	1.8453	3	1	43.594	GMGSMPKRGLEVSK	321	S	yes
Q9BRQ8	Apoptosis-inducing factor 2 (EC 1.-.-.-) (Apoptosis-inducing factor homologous mitochondrion-associated inducer of death) (Apoptosis-inducing factor-like mitochondrion-associated inducer of death) (p53-responsive gene 3 protein)	3.7561	4	0.810875	63.128	SRDLFVSTSWKTMR	356	S	yes
Q9BRZ2	E3 ubiquitin-protein ligase TRIM56 (EC 2.3.2.27) (RING finger protein 109) (RING-type E3 ubiquitin transferase TRIM56) (Tripartite motif-containing protein 56)	0.22802	3	0.499986	49.5	DGAGTQGGEESQSR	394	S	yes
Q9BRZ2	E3 ubiquitin-protein ligase TRIM56 (EC 2.3.2.27) (RING finger protein 109) (RING-type E3 ubiquitin transferase TRIM56) (Tripartite motif-containing protein 56)	0.22802	3	0.499986	49.5	DGAGTQGGEESQSR	392	S	yes
Q9BSH4	Translational activator of cytochrome c oxidase 1 (Coiled-coil domain-containing protein 44) (Translational activator of mitochondrially-encoded cytochrome c oxidase I)	0.68986	2	0.99998	61.435	SAWAAASLSR	2	S	yes
Q9BSW2	EF-hand calcium-binding domain-containing protein 4B (Calcium release-activated calcium channel regulator 2A) (CRAC channel regulator 2A) (Calcium release-activated channel regulator 2A)	1.1596	3	0.991158	49.595	APPRSLGSEGPV	391	S	yes
Q9BSW2	EF-hand calcium-binding domain-containing protein 4B (Calcium release-activated calcium channel regulator 2A) (CRAC channel regulator 2A) (Calcium release-activated channel regulator 2A)	2.7004	2	0.99997	46.129	SLGSEGPV	388	S	yes
Q9BTC0	Death-inducer obliterator 1 (DIO-1) (hDido1) (Death-associated transcription factor 1) (DATF-1)	2.2954	3	1	78.903	VEQFLTIARRR	79	T	yes
Q9BUV8	Uncharacterized protein RAB5IF (Rab5-interacting protein) (RIP5)	5.7718	3	0.986861	94.409	VSVWSKVLR	26	S	yes
Q9BV35	Calcium-binding mitochondrial carrier protein SCaMC-3 (Mitochondrial ATP-Mg/Pi carrier protein 2) (Mitochondrial Ca(2+)-dependent solute carrier protein 2) (Small calcium-binding mitochondrial carrier protein 3) (Solute carrier family 25 member 23)	0.42614	3	1	72.496	RGSPGDAERR	4	S	yes
Q9BVV7	Mitochondrial import inner membrane translocase subunit Tim21 (TIM21-like protein, mitochondrial)	2.8419	3,4	0.84415	55.414	GGTAVPTSQKVK	98	T	yes
Q9BVV7	Mitochondrial import inner membrane translocase subunit Tim21 (TIM21-like protein, mitochondrial)	2.8419	3	0.498691	55.414	GGTAVPTSQKVK	97	S	yes
Q9BWF2	E3 ubiquitin-protein ligase TRAIP (EC 2.3.2.27) (RING finger protein 206) (RING-type E3 ubiquitin transferase TRAIP) (TRAF-interacting protein)	5.1653	2	0.99999	74.533	TVPSLFQAK	454	T	yes
Q9BWF2	E3 ubiquitin-protein ligase TRAIP (EC 2.3.2.27) (RING finger protein 206) (RING-type E3 ubiquitin transferase TRAIP) (TRAF-interacting protein)	2.2773	3	1	51.276	EIMSLKK	266	S	yes
Q9BWK5	Cell cycle regulator of non-homologous end joining (Cell cycle regulator of NHEJ) (Modulator of retrovirus infection homolog)	1.777	2	0.999894	129.42	ETLQSETK	8	T	yes
Q9BWT6	Meiotic nuclear division protein 1 homolog	3.3306	2	0.995162	61.235	IGRCETEERTR	121	T	yes
Q9BX66	Sorbin and SH3 domain-containing protein 1 (Ponsin) (SH3 domain protein 5) (SH3P12) (c-Cbl-associated protein) (CAP)	2.8944	3	0.499954	56.205	RPSSSASTK	708	S	yes
Q9BX66	Sorbin and SH3 domain-containing protein 1 (Ponsin) (SH3 domain protein 5) (SH3P12) (c-Cbl-associated protein) (CAP)	2.8944	3	0.499954	56.205	RPSSSASTK	707	T	yes
Q9BX66	Sorbin and SH3 domain-containing protein 1 (Ponsin) (SH3 domain protein 5) (SH3P12) (c-Cbl-associated protein) (CAP)	2.0607	2	0.857173	44.543	PSSSASTK	708	T	yes
Q9BXF6	Rab11 family-interacting protein 5 (Rab11-FIP5) (Gamma-SNAP-associated factor 1) (Gaf-1) (Phosphoprotein pp75) (Rab11-interacting protein Rip11)	4.0778	3	0.999801	53.001	AQHTQWYKLHSK	150	S	yes
Q9BXF6	Rab11 family-interacting protein 5 (Rab11-FIP5) (Gamma-SNAP-associated factor 1) (Gaf-1) (Phosphoprotein pp75) (Rab11-interacting protein Rip11)	4.4895	3	1	42.914	LHSKPGKK	150	S	yes
Q9BXL7	Caspase recruitment domain-containing protein 11 (CARD-containing MAGUK protein 1) (Carma 1)	3.2255	3	0.999856	59.372	NTLQPEEALSTSDPR	871	T	yes
Q9BXT4	Tudor domain-containing protein 1 (Cancer/testis antigen 41.1) (CT41.1)	1.3236	3	1	52.79	PLLMEQYCSIK	409	S	yes
Q9BXT5	Testis-expressed protein 15 (Cancer/testis antigen 42) (CT42)	0.1665	4	0.999906	70.54	NVNFSAAETK	2443	S	yes
Q9BXT5	Testis-expressed protein 15 (Cancer/testis antigen 42) (CT42)	1.8156	4	0.998562	58.63	ERTQSFSKK	1901	T	yes
Q9BXT5	Testis-expressed protein 15 (Cancer/testis antigen 42) (CT42)	2.2132	3	0.50035	49.423	LTSQDSSECFSSLSQGR	952	S	yes
Q9BXU1	Serine/threonine-protein kinase 31 (EC 2.7.11.1) (Serine/threonine-protein kinase NYD-SPK) (Sugen kinase 396) (SgK396)	2.6407	4	0.999972	51.135	YMNSGGLLTMSLER	718	S	yes
Q9BXU1	Serine/threonine-protein kinase 31 (EC 2.7.11.1) (Serine/threonine-protein kinase NYD-SPK) (Sugen kinase 396) (SgK396)	2.6407	4	0.998121	51.135	YMNSGGLLTMSLER	723	T	yes
Q9BXU7	Ubiquitin carboxyl-terminal hydrolase 26 (EC 3.4.19.12) (Deubiquitinating enzyme 26) (Ubiquitin thioesterase 26) (Ubiquitin-specific-processing protease 26)	4.54	3	1	107.37	PTKLNLQKSNR	776	T	yes
Q9BXW6	Oxysterol-binding protein-related protein 1 (ORP-1) (OSBP-related protein 1)	3.4424	3	1	46.406	VEGYIQDKSK	764	S	yes
Q9BXW9	Fanconi anemia group D2 protein (Protein FACD2)	1.2736	2	0.43731	44.318	DASSSTFPTLTR	1227	T	yes
Q9BXW9	Fanconi anemia group D2 protein (Protein FACD2)	1.2736	2	0.43731	44.318	DASSSTFPTLTR	1225	T	yes
Q9BXX3	Ankyrin repeat domain-containing protein 30A (Serologically defined breast cancer antigen NY-BR-1)	1.6941	2	0.998984	45.081	VTSNKTK	439	T	yes
Q9BY42	Protein RTF2 homolog (Replication termination factor 2 domain-containing protein 1)	0.306	2	0.987534	91.914	SLFTTHSSAK	280	S	yes
Q9BY49	Peroxisomal trans-2-enoyl-CoA reductase (TERP) (EC 1.3.1.38) (2,4-dienoyl-CoA reductase-related protein) (DCR-RP) (HPDHase) (Short chain dehydrogenase/reductase family 29C member 1) (pVI-ARL)	0.81539	4	0.999984	64.65	SLALEWACSGIR	184	S	yes
Q9BYC2	Succinyl-CoA:3-ketoacid coenzyme A transferase 2, mitochondrial (EC 2.8.3.5) (3-oxoacid CoA-transferase 2A) (Testis-specific succinyl-CoA:3-oxoacid CoA-transferase) (SCOT-t)	1.0364	3	0.999832	64.374	CTMPLTGKR	458	T	yes
Q9BYG7	Protein maestro (Male-specific transcription in the developing reproductive organs) (Protein B29)	4.6027	3	0.643612	43.12	IQGKGLGSFFIDITLQTRTLLDDENDSLR	139	T	yes
Q9BYJ9	YTH domain-containing family protein 1 (Dermatomyositis associated with cancer putative autoantigen 1) (DACA-1)	0.50894	3	0.968724	63.662	IGDVSSSAVK	196	S	yes
Q9BYV8	Centrosomal protein of 41 kDa (Cep41) (Testis-specific gene A14 protein)	3.7	3	0.992148	40.994	LDTGNSMTK	32	T	yes
Q9BYW2	Histone-lysine N-methyltransferase SETD2 (EC 2.1.1.43) (HIF-1) (Huntingtin yeast partner B) (Huntingtin-interacting protein 1) (HIP-1) (Huntingtin-interacting protein B) (Lysine N-methyltransferase 3A) (Protein-lysine N-methyltransferase SETD2) (EC 2.1.1.-) (SET domain-containing protein 2) (hSET2) (p231HBP)	2.1887	4	0.999944	64.836	RGSSYSK	546	S	yes
Q9BYW2	Histone-lysine N-methyltransferase SETD2 (EC 2.1.1.43) (HIF-1) (Huntingtin yeast partner B) (Huntingtin-interacting protein 1) (HIP-1) (Huntingtin-interacting protein B) (Lysine N-methyltransferase 3A) (Protein-lysine N-methyltransferase SETD2) (EC 2.1.1.-) (SET domain-containing protein 2) (hSET2) (p231HBP)	5.9449	2	1	58.63	TIVLPPNWK	2388	T	yes
Q9BYX2	TBC1 domain family member 2A (Armus) (Prostate antigen recognized and identified by SEREX 1) (PARIS-1)	2.304	3	1	71.153	SRWFFYDER	66	S	yes
Q9BZ95	Histone-lysine N-methyltransferase NSD3 (EC 2.1.1.43) (Nuclear SET domain-containing protein 3) (Protein whistle) (WHSC1-like 1 isoform 9 with methyltransferase activity to lysine) (Wolf-Hirschhorn syndrome candidate 1-like protein 1) (WHSC1-like protein 1)	0.28049	4	0.999315	71.221	RGTGMSKK	698	S	yes
Q9BZD4	Kinetochore protein Nuf2 (hNuf2) (hNuf2R) (hsNuf2) (Cell division cycle-associated protein 1)	1.6443	4	0.8683	41.383	KMETLSFPR	4	T	yes
Q9BZF2	Oxysterol-binding protein-related protein 7 (ORP-7) (OSBP-related protein 7)	1.3684	4	0.999372	104.22	EKVSSWLR	186	S	yes
Q9BZF2	Oxysterol-binding protein-related protein 7 (ORP-7) (OSBP-related protein 7)	0.32523	4	0.83584	71.545	VTSCIHNVLSGQR	638	T	yes
Q9BZF9	Uveal autoantigen with coiled-coil domains and ankyrin repeats	1.5511	3	1	129.42	KITELTLK	706	T	yes
Q9C099	Leucine-rich repeat and coiled-coil domain-containing protein 1 (Centrosomal leucine-rich repeat and coiled-coil domain-containing protein)	2.8865	3	1	114.89	QKCIDSANLK	988	S	yes
Q9C0A1	Zinc finger homeobox protein 2 (Zinc finger homeodomain protein 2) (ZFH-2)	2.9538	4	1	79.036	LFSNMLILK	1490	S	yes
Q9C0B2	Cilia- and flagella-associated protein 74	1.147	3	1	131.12	TVERLRSR	497	S	yes
Q9C0C7	Activating molecule in BECN1-regulated autophagy protein 1	2.6773	2	0.999935	90.149	TVLSLNSR	422	T	yes
Q9C0D2	Centrosomal protein of 295 kDa	0.76115	3	0.984602	76.332	SSKPPVAKVK	1829	S	yes
Q9C0D2	Centrosomal protein of 295 kDa	4.6381	4	0.996224	48.998	EIPRLQDRLLSLSK	1593	S	yes
Q9C0D5	Protein TANC1 (Tetratricopeptide repeat, ankyrin repeat and coiled-coil domain-containing protein 1)	0.31165	3	0.485154	57.703	HPASLTSSGSSGSPSSSIK	1662	T	yes
Q9C0D5	Protein TANC1 (Tetratricopeptide repeat, ankyrin repeat and coiled-coil domain-containing protein 1)	0.31165	3	0.485154	57.703	HPASLTSSGSSGSPSSSIK	1661	S	yes
Q9C0D5	Protein TANC1 (Tetratricopeptide repeat, ankyrin repeat and coiled-coil domain-containing protein 1)	3.4144	3	0.49702	46.318	SQPSSSVPSSYIR	1485	S	yes
Q9C0D5	Protein TANC1 (Tetratricopeptide repeat, ankyrin repeat and coiled-coil domain-containing protein 1)	3.4144	3	0.49702	46.318	SQPSSSVPSSYIR	1486	S	yes
Q9C0E4	Glutamate receptor-interacting protein 2 (GRIP-2)	1.3801	3	0.997765	70.889	SVELGITISSASR	576	S	yes
Q9C0E4	Glutamate receptor-interacting protein 2 (GRIP-2)	3.3512	3	0.999652	53.754	GSPPPTEPRR	824	S	yes
Q9C0F0	Putative Polycomb group protein ASXL3 (Additional sex combs-like protein 3)	0.50301	3	0.5	144.18	STGQPLVTHSGSSK	1616	S	yes
Q9C0F0	Putative Polycomb group protein ASXL3 (Additional sex combs-like protein 3)	0.50301	3	0.5	144.18	STGQPLVTHSGSSK	1617	T	yes
Q9C0F1	Centrosomal protein of 44 kDa (Cep44) (HBV PreS1-transactivated protein 3) (PS1TP3)	5.2385	2	0.5	42.718	KKISSGK	139	S	yes
Q9C0F1	Centrosomal protein of 44 kDa (Cep44) (HBV PreS1-transactivated protein 3) (PS1TP3)	5.2385	2	0.5	42.718	KKISSGK	138	S	yes
Q9C0I3	Serine-rich coiled-coil domain-containing protein 1 (Coiled-coil serine-rich protein 1)	0.81048	2	0.971202	47.844	QRAGSSSSK	495	S	yes
Q9GZN7	Protein rogdi homolog	2.0696	3	0.996521	70.889	ATVMAATAAER	3	T	yes
Q9GZY0	Nuclear RNA export factor 2 (Cancer/testis antigen 39) (CT39) (TAP-like protein 2) (TAPL-2)	0.36792	3	0.999646	59.35	HTPYSIR	82	S	yes
Q9GZY8	Mitochondrial fission factor	5.3304	4	0.98818	92.051	GTSSDTSLGR	7	S	yes
Q9H069	Dynein regulatory complex subunit 3 (Leucine-rich repeat-containing protein 48)	2.1598	3	0.977758	65.627	CLRTLSLSR	164	S	yes
Q9H089	Large subunit GTPase 1 homolog (hLsg1) (EC 3.6.1.-)	5.3611	4	0.999687	81.494	KVSVSATPGHTK	413	S	yes
Q9H0A0	RNA cytidine acetyltransferase (EC 2.3.1.-) (18S rRNA cytosine acetyltransferase) (N-acetyltransferase 10)	0.57531	4	1	50.827	WLNDLLCLDCLNITR	493	T	yes
Q9H0E9	Bromodomain-containing protein 8 (Skeletal muscle abundant protein) (Skeletal muscle abundant protein 2) (Thyroid hormone receptor coactivating protein of 120 kDa) (TrCP120) (p120)	4.2311	3	0.999587	42.348	ELCRETEELSAK	1001	S	yes
Q9H0M4	Zinc finger CW-type PWWP domain protein 1	4.3254	3	1	59.198	TDPILPIRKR	470	T	yes
Q9H0M4	Zinc finger CW-type PWWP domain protein 1	2.3889	3	1	56.432	TDPILPIRK	470	T	yes
Q9H270	Vacuolar protein sorting-associated protein 11 homolog (hVPS11) (RING finger protein 108)	0.93873	3	0.879799	63.184	YREETTR	800	T	yes
Q9H2D6	TRIO and F-actin-binding protein (Protein Tara) (Trio-associated repeat on actin)	0.54815	2	1	53.71	DNPRASR	464	S	yes
Q9H2P0	Activity-dependent neuroprotector homeobox protein (Activity-dependent neuroprotective protein)	4.07	4	0.999595	66.92	SYGLGSEQR	377	S	yes
Q9H2T7	Ran-binding protein 17	4.5982	3	1	53.237	VASVPFVK	389	S	yes
Q9H2T7	Ran-binding protein 17	0.2339	2	1	40.725	MVASVPFVK	389	S	yes
Q9H2U2	Inorganic pyrophosphatase 2, mitochondrial (EC 3.6.1.1) (Pyrophosphatase SID6-306) (Pyrophosphate phospho-hydrolase 2) (PPase 2)	5.681	3	0.997037	76.588	KLGTSAGTGSR	23	T	yes
Q9H2U2	Inorganic pyrophosphatase 2, mitochondrial (EC 3.6.1.1) (Pyrophosphatase SID6-306) (Pyrophosphate phospho-hydrolase 2) (PPase 2)	1.1522	2	0.895941	53.968	LGTSAGTGSR	28	S	yes
Q9H2X6	Homeodomain-interacting protein kinase 2 (hHIPk2) (EC 2.7.11.1)	2.294	3	1	55.105	SLGLIHADLK	317	S	yes
Q9H3K2	Growth hormone-inducible transmembrane protein (Dermal papilla-derived protein 2) (Mitochondrial morphology and cristae structure 1) (MICS1) (Transmembrane BAX inhibitor motif-containing protein 5)	4.0886	3	1	41.109	GRTGQELK	58	T	yes
Q9H3Q1	Cdc42 effector protein 4 (Binder of Rho GTPases 4)	1.7459	4	0.818577	59.908	GSKRSQSVTR	86	S	yes
Q9H3U1	Protein unc-45 homolog A (Unc-45A) (GCUNC-45) (Smooth muscle cell-associated protein 1) (SMAP-1)	3.8037	3	0.979372	104.41	PATPGASSVEQLR	15	T	yes
Q9H410	Kinetochore-associated protein DSN1 homolog	1.9641	3	0.756324	41.399	MTSVTRSEIIDEK	5	T	yes
Q9H425	Uncharacterized protein C1orf198	2.5308	3	0.66049	46.318	RFTYFSSLSPMAR	34	S	yes
Q9H4A3	Serine/threonine-protein kinase WNK1 (EC 2.7.11.1) (Erythrocyte 65 kDa protein) (p65) (Kinase deficient protein) (Protein kinase lysine-deficient 1) (Protein kinase with no lysine 1) (hWNK1)	2.8873	2	0.5	50.292	RVTSGVK	436	T	yes
Q9H4A3	Serine/threonine-protein kinase WNK1 (EC 2.7.11.1) (Erythrocyte 65 kDa protein) (p65) (Kinase deficient protein) (Protein kinase lysine-deficient 1) (Protein kinase with no lysine 1) (hWNK1)	2.8873	2	0.5	50.292	RVTSGVK	437	S	yes
Q9H4B4	Serine/threonine-protein kinase PLK3 (EC 2.7.11.21) (Cytokine-inducible serine/threonine-protein kinase) (FGF-inducible kinase) (Polo-like kinase 3) (PLK-3) (Proliferation-related kinase)	4.4132	3	0.999397	149.33	VTKSLFGRK	348	T	yes
Q9H4I9	Essential MCU regulator, mitochondrial (Single-pass membrane protein with aspartate-rich tail 1, mitochondrial)	0.63671	3	1	53.567	KMSFGLLR	64	S	yes
Q9H582	Zinc finger protein 644 (Zinc finger motif enhancer-binding protein 2) (Zep-2)	4.5392	3	0.902678	94.363	RTGTGTPVKR	1018	T	yes
Q9H582	Zinc finger protein 644 (Zinc finger motif enhancer-binding protein 2) (Zep-2)	0.83679	2	0.999937	89.679	SRSRSGSK	1242	S	yes
Q9H694	Protein bicaudal C homolog 1 (Bic-C)	0.1878	3	0.998676	84.817	QPSKSVIVK	394	S	yes
Q9H6Q4	Cytosolic iron-sulfur assembly component 3 (Cytosolic Fe-S cluster assembly factor NARFL) (Iron-only hydrogenase-like protein 1) (IOP1) (Nuclear prelamin A recognition factor-like protein) (Protein related to Narf)	4.4782	3	1	51.348	KVLDANKMAAPSQQR	107	S	yes
Q9H6Q4	Cytosolic iron-sulfur assembly component 3 (Cytosolic Fe-S cluster assembly factor NARFL) (Iron-only hydrogenase-like protein 1) (IOP1) (Nuclear prelamin A recognition factor-like protein) (Protein related to Narf)	4.6947	4	0.652243	43.083	KLTSFFKK	140	T	yes
Q9H6R3	Acyl-CoA synthetase short-chain family member 3, mitochondrial (EC 6.2.1.1) (Acyl-CoA synthetase short-chain family member 3)	5.5821	3	1	41.689	MKPSWLQCR	4	S	yes
Q9H6U6	Breast carcinoma-amplified sequence 3 (GAOB1)	0.48925	3,4	0.891009	84.352	KLADAMAESPSR	870	S	yes
Q9H707	Zinc finger protein 552	5.2721	3	0.999997	56.547	TPMAGVSPK	86	S	yes
Q9H707	Zinc finger protein 552	2.6604	3	0.993691	41.577	KTPMAGVSPK	87	S	yes
Q9H788	SH2 domain-containing protein 4A (Protein SH(2)A) (Protein phosphatase 1 regulatory subunit 38)	3.705	2	0.99981	107.29	SLSSSSR	172	S	yes
Q9H7R5	Zinc finger protein 665 (Zinc finger protein 160-like)	2.8685	2	1	45.864	CNECGKAFSVR	263	S	yes
Q9H7U1	Serine-rich coiled-coil domain-containing protein 2 (Coiled-coil serine-rich protein 2) (Protein GCAP14 homolog)	3.6659	2	1	104.2	TQLLKLKR	677	T	yes
Q9H8W3	Protein FAM204A	4.8147	3	0.71637	50.786	HSEQKSTTSR	88	S	yes
Q9H8Y5	Ankyrin repeat and zinc finger domain-containing protein 1 (Zinc finger protein 744)	0.0092443	3	0.99983	85.973	SGRSLFFGGK	301	S	yes
Q9H939	Proline-serine-threonine phosphatase-interacting protein 2 (PEST phosphatase-interacting protein 2)	0.97029	3	1	42.718	TELIMDAIHK	119	T	yes
Q9H992	E3 ubiquitin-protein ligase MARCH7 (EC 2.3.2.27) (Axotrophin) (Membrane-associated RING finger protein 7) (Membrane-associated RING-CH protein VII) (MARCH-VII) (RING finger protein 177) (RING-type E3 ubiquitin transferase MARCH7)	0.6641	3	0.708937	82.651	SNFSSRESESSR	224	S	yes
Q9H9Y2	Ribosome production factor 1 (Brix domain-containing protein 5) (Ribosome biogenesis protein RPF1)	0.80292	3	1	74.611	QRRHLMFTR	68	T	yes
Q9HAU5	Regulator of nonsense transcripts 2 (Nonsense mRNA reducing factor 2) (Up-frameshift suppressor 2 homolog) (hUpf2)	3.7003	2	1	98.629	DDTKEAK	500	T	yes
Q9HAW0	Transcription factor IIIB 50 kDa subunit (TFIIIB50) (hTFIIIB50) (B-related factor 2) (BRF-2) (hBRFU)	3.9019	3	0.908106	40.154	LFQASPSVPAK	188	S	yes
Q9HAW4	Claspin (hClaspin)	1.528	3	0.812448	81.656	GTSFFPTAGGFRSPSPGLFR	797	T	yes
Q9HBK9	Arsenite methyltransferase (EC 2.1.1.137) (Methylarsonite methyltransferase) (S-adenosyl-L-methionine:arsenic(III) methyltransferase)	1.7895	3	0.999968	51.265	SRCVPDAAGGCCGTK	371	T	yes
Q9HBL0	Tensin-1	0.48883	3	0.999994	80.916	YSMPDNSPETRAKVK	1441	S	yes
Q9HBL8	NmrA-like family domain-containing protein 1	0.03114	3	0.911106	48.741	KDIGVPMTSVR	150	S	yes
Q9HCK1	DBF4-type zinc finger-containing protein 2	5.2262	3	1	104.05	KSLRMNSDK	266	S	yes
Q9HCK1	DBF4-type zinc finger-containing protein 2	0.76255	4	0.998873	59.641	KVSSKGK	1870	S	yes
Q9HCM7	Fibrosin-1-like protein (AUTS2-like protein) (HBV X-transactivated gene 9 protein) (HBV XAg-transactivated protein 9)	1.3732	2	0.998318	40.715	ASPPHSK	844	S	yes
Q9HD90	Neurogenic differentiation factor 4 (NeuroD4) (Class A basic helix-loop-helix protein 4) (bHLHa4) (Protein atonal homolog 3) (ATH-3) (Atoh3)	1.9648	3	0.572014	61.235	TQKLSKIETLR	120	T	yes
Q9HD90	Neurogenic differentiation factor 4 (NeuroD4) (Class A basic helix-loop-helix protein 4) (bHLHa4) (Protein atonal homolog 3) (ATH-3) (Atoh3)	3.0485	3	0.995813	55.258	MSKTFVKSK	8	S	yes
Q9HD90	Neurogenic differentiation factor 4 (NeuroD4) (Class A basic helix-loop-helix protein 4) (bHLHa4) (Protein atonal homolog 3) (ATH-3) (Atoh3)	0.33627	2	0.997099	53.567	KMSKTFVK	5	T	yes
Q9HD90	Neurogenic differentiation factor 4 (NeuroD4) (Class A basic helix-loop-helix protein 4) (bHLHa4) (Protein atonal homolog 3) (ATH-3) (Atoh3)	2.1889	3	0.989294	47.039	MSKTFVKSK	2	S	yes
Q9HD90	Neurogenic differentiation factor 4 (NeuroD4) (Class A basic helix-loop-helix protein 4) (bHLHa4) (Protein atonal homolog 3) (ATH-3) (Atoh3)	4.6488	3	0.5	46.158	MSKTFVK	4	S	yes
Q9HD90	Neurogenic differentiation factor 4 (NeuroD4) (Class A basic helix-loop-helix protein 4) (bHLHa4) (Protein atonal homolog 3) (ATH-3) (Atoh3)	4.6488	3	0.5	46.158	MSKTFVK	2	T	yes
Q9NP62	Chorion-specific transcription factor GCMa (hGCMa) (GCM motif protein 1) (Glial cells missing homolog 1)	1.2662	3	1	70.68	NTNNHNSRILK	64	T	yes
Q9NPA5	Zinc finger protein 64 homolog, isoforms 1 and 2 (Zfp-64) (Zinc finger protein 338)	1.0717	2	0.999817	64.42	QPSNLSK	384	S	yes
Q9NQ66	1-phosphatidylinositol 4,5-bisphosphate phosphodiesterase beta-1 (EC 3.1.4.11) (PLC-154) (Phosphoinositide phospholipase C-beta-1) (Phospholipase C-I) (PLC-I) (Phospholipase C-beta-1) (PLC-beta-1)	0.14362	2	0.998973	101.38	SSEGSGKK	473	S	yes
Q9NQ66	1-phosphatidylinositol 4,5-bisphosphate phosphodiesterase beta-1 (EC 3.1.4.11) (PLC-154) (Phosphoinositide phospholipase C-beta-1) (Phospholipase C-I) (PLC-I) (Phospholipase C-beta-1) (PLC-beta-1)	0.36285	4	0.498779	51.073	VETALEACSLPSSR	196	S	yes
Q9NQ66	1-phosphatidylinositol 4,5-bisphosphate phosphodiesterase beta-1 (EC 3.1.4.11) (PLC-154) (Phosphoinositide phospholipase C-beta-1) (Phospholipase C-I) (PLC-I) (Phospholipase C-beta-1) (PLC-beta-1)	0.36285	4	0.498779	51.073	VETALEACSLPSSR	197	S	yes
Q9NQ66	1-phosphatidylinositol 4,5-bisphosphate phosphodiesterase beta-1 (EC 3.1.4.11) (PLC-154) (Phosphoinositide phospholipase C-beta-1) (Phospholipase C-I) (PLC-I) (Phospholipase C-beta-1) (PLC-beta-1)	0.36285	4	0.999936	51.073	VETALEACSLPSSR	187	T	yes
Q9NQI0	Probable ATP-dependent RNA helicase DDX4 (EC 3.6.4.13) (DEAD box protein 4) (Vasa homolog)	2.7145	2	1	78.692	TMVFVETKK	549	T	yes
Q9NQL9	Doublesex- and mab-3-related transcription factor 3	5.7893	3	0.890935	60.398	SSPDVAK	179	S	yes
Q9NQS7	Inner centromere protein	5.5668	3	0.5	104.22	SSQLSSRR	98	S	yes
Q9NQS7	Inner centromere protein	5.5668	3	0.5	104.22	SSQLSSRR	97	S	yes
Q9NQS7	Inner centromere protein	0.90896	3	0.950511	67.08	SRSSQLSSRR	97	S	yes
Q9NR09	Baculoviral IAP repeat-containing protein 6 (EC 2.3.2.27) (BIR repeat-containing ubiquitin-conjugating enzyme) (BRUCE) (RING-type E3 ubiquitin transferase BIRC6) (Ubiquitin-conjugating BIR domain enzyme apollon) (APOLLON)	1.1868	3	0.817872	41.577	SLMYSEANRR	285	S	yes
Q9NR12	PDZ and LIM domain protein 7 (LIM mineralization protein) (LMP) (Protein enigma)	0.062176	2,3,4	1	77.74	AQPVQSKPQK	89	S	yes
Q9NR64	Kelch-like protein 1	3.8625	3	1	90.827	RTLMQSPR	444	T	yes
Q9NRE2	Teashirt homolog 2 (Ovarian cancer-related protein 10-2) (OVC10-2) (Zinc finger protein 218)	0.50893	3	0.499898	74.141	PVLSPASTRSASVSRR	747	T	yes
Q9NRL3	Striatin-4 (Zinedin)	4.0037	2	0.988517	86.467	LASCSADGTVR	563	S	yes
Q9NRM2	Zinc finger protein 277 (Nuclear receptor-interacting factor 4)	0.58465	2	0.998057	52.403	THMEETK	379	T	yes
Q9NS73	MAP3K12-binding inhibitory protein 1 (MAPK upstream kinase-binding inhibitory protein) (MUK-binding inhibitory protein)	4.6603	3	1	41.378	TQIHFDPEVVQIK	141	T	yes
Q9NS91	E3 ubiquitin-protein ligase RAD18 (EC 2.3.2.27) (Postreplication repair protein RAD18) (hHR18) (hRAD18) (RING finger protein 73) (RING-type E3 ubiquitin transferase RAD18)	0.36968	3	1	70.98	QGSRLMDNFLIR	130	S	yes
Q9NS91	E3 ubiquitin-protein ligase RAD18 (EC 2.3.2.27) (Postreplication repair protein RAD18) (hHR18) (hRAD18) (RING finger protein 73) (RING-type E3 ubiquitin transferase RAD18)	0.1227	3	0.984822	55.213	NDLQDTEISPR	468	T	yes
Q9NS91	E3 ubiquitin-protein ligase RAD18 (EC 2.3.2.27) (Postreplication repair protein RAD18) (hHR18) (hRAD18) (RING finger protein 73) (RING-type E3 ubiquitin transferase RAD18)	2.3919	4	0.99997	54.288	SKFSPQKEASPAAK	164	S	yes
Q9NSC2	Sal-like protein 1 (Spalt-like transcription factor 1) (Zinc finger protein 794) (Zinc finger protein SALL1) (Zinc finger protein Spalt-1) (HSal1) (Sal-1)	0.23149	3	0.895543	68.536	GQPSRPTKSK	37	T	yes
Q9NSI6	Bromodomain and WD repeat-containing protein 1 (WD repeat-containing protein 9)	0.18732	3	0.999918	85.958	MAEPSSAR	6	S	yes
Q9NSI6	Bromodomain and WD repeat-containing protein 1 (WD repeat-containing protein 9)	2.329	3	0.972603	59.116	AESISEEADSEPGR	1786	S	yes
Q9NSI6	Bromodomain and WD repeat-containing protein 1 (WD repeat-containing protein 9)	1.4798	3	0.845225	50.791	DAVQMPSETLK	2218	S	yes
Q9NSK0	Kinesin light chain 4 (KLC 4) (Kinesin-like protein 8)	2.3699	3	1	74.173	KLQGTEPR	576	T	yes
Q9NTK1	Protein DEPP1 (Decidual protein induced by progesterone) (Fasting-induced gene protein) (FIG)	0.095355	3	0.999546	56.916	LLLSVAHLPTIR	14	T	yes
Q9NTU4	Cation channel sperm-associated protein subunit zeta (CatSper-zeta) (CatSperzeta) (Testis-expressed protein 40)	0.59878	3	0.999999	92.051	PSKVSLK	6	S	yes
Q9NTX5	Ethylmalonyl-CoA decarboxylase (EC 4.1.1.94) (Enoyl-CoA hydratase domain-containing protein 1) (Methylmalonyl-CoA decarboxylase) (MMCD) (EC 4.1.1.41)	5.5178	3	1	117.81	LVEIIGSR	205	S	yes
Q9NTZ6	RNA-binding protein 12 (RNA-binding motif protein 12) (SH3/WW domain anchor protein in the nucleus) (SWAN)	1.4264	2	0.999999	97.452	TGGTIKGSK	67	S	yes
Q9NU22	Midasin (Dynein-related AAA-ATPase MDN1) (MIDAS-containing protein)	2.1234	2	1	96.113	RELNEVLQSR	487	S	yes
Q9NUQ7	Ufm1-specific protease 2 (UfSP2) (EC 3.4.22.-)	0.81155	3	0.98099	72.34	KMVISESMDILFR	7	S	yes
Q9NUQ7	Ufm1-specific protease 2 (UfSP2) (EC 3.4.22.-)	0.49934	3	0.795988	56.205	KMVISESMDILFR	5	S	yes
Q9NUT2	ATP-binding cassette sub-family B member 8, mitochondrial (Mitochondrial ATP-binding cassette 1) (M-ABC1)	0.42009	2	0.995383	119.68	TTVASLLER	514	T	yes
Q9NUU6	Inactive ubiquitin thioesterase FAM105A	0.54882	3	1	86.772	GETPRNKLMR	108	T	yes
Q9NUW8	Tyrosyl-DNA phosphodiesterase 1 (Tyr-DNA phosphodiesterase 1) (EC 3.1.4.-)	1.208	2,3	1	60.518	VSGVKPK	172	S	yes
Q9NUW8	Tyrosyl-DNA phosphodiesterase 1 (Tyr-DNA phosphodiesterase 1) (EC 3.1.4.-)	1.1191	3	1	44.425	GNPFQFYLTR	169	T	yes
Q9NUW8	Tyrosyl-DNA phosphodiesterase 1 (Tyr-DNA phosphodiesterase 1) (EC 3.1.4.-)	0.13837	4	0.252356	41.521	SQEGDYGRWTISSSDESEEEKPK	2	S	yes
Q9NUW8	Tyrosyl-DNA phosphodiesterase 1 (Tyr-DNA phosphodiesterase 1) (EC 3.1.4.-)	0.13837	4	0.252356	41.521	SQEGDYGRWTISSSDESEEEKPK	13	S	yes
Q9NUW8	Tyrosyl-DNA phosphodiesterase 1 (Tyr-DNA phosphodiesterase 1) (EC 3.1.4.-)	0.13837	4	0.252356	41.521	SQEGDYGRWTISSSDESEEEKPK	14	S	yes
Q9NUW8	Tyrosyl-DNA phosphodiesterase 1 (Tyr-DNA phosphodiesterase 1) (EC 3.1.4.-)	0.13837	4	0.252356	41.521	SQEGDYGRWTISSSDESEEEKPK	15	S	yes
Q9NUW8	Tyrosyl-DNA phosphodiesterase 1 (Tyr-DNA phosphodiesterase 1) (EC 3.1.4.-)	0.13837	4	0.738222	41.521	SQEGDYGRWTISSSDESEEEKPK	18	S	yes
Q9NUW8	Tyrosyl-DNA phosphodiesterase 1 (Tyr-DNA phosphodiesterase 1) (EC 3.1.4.-)	0.13837	4	0.252356	41.521	SQEGDYGRWTISSSDESEEEKPK	11	T	yes
Q9NV66	S-adenosyl-L-methionine-dependent tRNA 4-demethylwyosine synthase (EC 4.1.3.44) (Radical S-adenosyl methionine and flavodoxin domain-containing protein 1) (tRNA wybutosine-synthesizing protein 1 homolog) (tRNA-yW-synthesizing protein)	1.8637	3	0.998887	43.382	WLEEASIDFRFGKTYLK	167	T	yes
Q9NVH1	DnaJ homolog subfamily C member 11	2.0786	3	0.998598	67.326	GSLKAGFFGTVVEYGAER	325	S	yes
Q9NVH2	Integrator complex subunit 7 (Int7)	0.97174	3	0.438139	47.639	QLLQQLVTSYPSTK	228	T	yes
Q9NVQ4	Fas apoptotic inhibitory molecule 1	2.9178	3	1	55.213	LVGKETFYVGAAK	53	T	yes
Q9NVR2	Integrator complex subunit 10 (Int10)	1.3242	3	0.5	107.97	EISIITSALR	84	T	yes
Q9NVR2	Integrator complex subunit 10 (Int10)	1.3242	3	0.5	107.97	EISIITSALR	85	S	yes
Q9NW08	DNA-directed RNA polymerase III subunit RPC2 (RNA polymerase III subunit C2) (EC 2.7.7.6) (C128) (DNA-directed RNA polymerase III 127.6 kDa polypeptide) (DNA-directed RNA polymerase III subunit B)	3.9183	2	0.819353	41.689	ISSQFEKTR	457	S	yes
Q9NW64	Pre-mRNA-splicing factor RBM22 (RNA-binding motif protein 22) (Zinc finger CCCH domain-containing protein 16)	1.3882	2	1	130.01	EISNSDGTR	126	S	yes
Q9NW82	WD repeat-containing protein 70	0.74263	3	0.999704	46.318	SVFKPRTMQGK	321	S	yes
Q9NWH9	SAFB-like transcription modulator (Modulator of estrogen-induced transcription)	0.85019	2	1	55.04	KEAGPNPSR	879	S	yes
Q9NWS8	Required for meiotic nuclear division protein 1 homolog	3.8045	3	1	63.754	RVTHKPNLLGSK	108	T	yes
Q9NWX6	Probable tRNA(His) guanylyltransferase (EC 2.7.7.79) (Interphase cytoplasmic foci protein 45) (tRNA-histidine guanylyltransferase)	0.41281	2	0.999998	83.869	LGATMAKSK	33	S	yes
Q9NWY4	Histone PARylation factor 1	1.0408	5	0.999963	49.106	LTEAARELGYSLEQRTVK	193	T	yes
Q9NX14	NADH dehydrogenase [ubiquinone] 1 beta subcomplex subunit 11, mitochondrial (Complex I-ESSS) (CI-ESSS) (NADH-ubiquinone oxidoreductase ESSS subunit) (Neuronal protein 17.3) (Np17.3) (p17.3)	0.42431	3,4	1	75.566	AAGLFGLSAR	9	S	yes
Q9NX47	E3 ubiquitin-protein ligase MARCH5 (EC 2.3.2.27) (Membrane-associated RING finger protein 5) (Membrane-associated RING-CH protein V) (MARCH-V) (Mitochondrial ubiquitin ligase) (MITOL) (RING finger protein 153) (RING-type E3 ubiquitin transferase MARCH5)	4.1154	3	1	98.582	TILGGIAFVAIK	238	T	yes
Q9NX95	Syntabulin (Golgi-localized syntaphilin-related protein) (Syntaxin-1-binding protein)	4.1856	2	0.987997	46.318	PGSSPSSPREK	194	S	yes
Q9NXD2	Myotubularin-related protein 10	0.25739	3	0.999992	76.827	WLSSLENTR	367	S	yes
Q9NXD2	Myotubularin-related protein 10	0.25739	3	0.999992	76.827	WLSSLENTR	368	S	yes
Q9NXF1	Testis-expressed protein 10	5.6072	3	0.5	63.473	KRLTSQQWR	221	S	yes
Q9NXF1	Testis-expressed protein 10	5.6072	3	0.5	63.473	KRLTSQQWR	220	T	yes
Q9NXG0	Centlein (Centrosomal protein)	0.85239	2,3	0.999566	107.11	QSSNVKTLK	1113	S	yes
Q9NXG0	Centlein (Centrosomal protein)	1.8153	3	0.533744	65.157	TTMTKVK	823	T	yes
Q9NXV6	CDKN2A-interacting protein (Collaborator of ARF)	0.31981	3	0.498597	141.59	SSSSTNTSLLTSK	349	S	yes
Q9NXV6	CDKN2A-interacting protein (Collaborator of ARF)	0.31981	3	0.498597	141.59	SSSSTNTSLLTSK	350	S	yes
Q9NXV6	CDKN2A-interacting protein (Collaborator of ARF)	0.060344	3	0.499985	119.21	TSSEASVSSSVAK	324	S	yes
Q9NXV6	CDKN2A-interacting protein (Collaborator of ARF)	0.060344	3	0.499985	119.21	TSSEASVSSSVAK	323	T	yes
Q9NXV6	CDKN2A-interacting protein (Collaborator of ARF)	0.29567	3,4	0.54509	80.508	SVSSQSSSSVSSQVTTAGSGK	209	S	yes
Q9NXV6	CDKN2A-interacting protein (Collaborator of ARF)	0.29567	3	0.321354	80.508	SVSSQSSSSVSSQVTTAGSGK	211	S	yes
Q9NXV6	CDKN2A-interacting protein (Collaborator of ARF)	0.29567	3	0.321354	80.508	SVSSQSSSSVSSQVTTAGSGK	212	S	yes
Q9NXX6	Non-structural maintenance of chromosomes element 4 homolog A (NS4EA) (Non-SMC element 4 homolog A)	0.35217	3	0.999982	71.614	SPLSPRSR	38	S	yes
Q9NY33	Dipeptidyl peptidase 3 (EC 3.4.14.4) (Dipeptidyl aminopeptidase III) (Dipeptidyl arylamidase III) (Dipeptidyl peptidase III) (DPP III) (Enkephalinase B)	2.3193	3	0.91266	43.888	GLWQTCGELMFSLEPRLR	153	S	yes
Q9NYC9	Dynein heavy chain 9, axonemal (Axonemal beta dynein heavy chain 9) (Ciliary dynein heavy chain 9)	1.6571	3	0.984205	43.454	HEMTEGVTAYEEKPR	1696	T	yes
Q9NYF3	Protein FAM53C	5.0356	3	0.999983	85.212	SLSVPVDLSR	128	S	yes
Q9NYF8	Bcl-2-associated transcription factor 1 (Btf) (BCLAF1 and THRAP3 family member 1)	1.4514	3	1	62.659	TGKFLKR	333	T	yes
Q9NYJ8	TGF-beta-activated kinase 1 and MAP3K7-binding protein 2 (Mitogen-activated protein kinase kinase kinase 7-interacting protein 2) (TAK1-binding protein 2) (TAB-2) (TGF-beta-activated kinase 1-binding protein 2)	0.1013	3	0.200389	81.327	TSSTSSSVNSQTLNR	353	S	yes
Q9NYJ8	TGF-beta-activated kinase 1 and MAP3K7-binding protein 2 (Mitogen-activated protein kinase kinase kinase 7-interacting protein 2) (TAK1-binding protein 2) (TAB-2) (TGF-beta-activated kinase 1-binding protein 2)	4.7862	3	0.995624	59.227	KVVVTQPNTK	457	T	yes
Q9NYV4	Cyclin-dependent kinase 12 (EC 2.7.11.22) (EC 2.7.11.23) (Cdc2-related kinase, arginine/serine-rich) (CrkRS) (Cell division cycle 2-related protein kinase 7) (CDC2-related protein kinase 7) (Cell division protein kinase 12) (hCDK12)	0.43987	2	0.999126	65.627	SLSRSPLPSRK	349	S	yes
Q9NYV4	Cyclin-dependent kinase 12 (EC 2.7.11.22) (EC 2.7.11.23) (Cdc2-related kinase, arginine/serine-rich) (CrkRS) (Cell division cycle 2-related protein kinase 7) (CDC2-related protein kinase 7) (Cell division protein kinase 12) (hCDK12)	0.10435	3	0.487591	43.03	TSAVSSQANSQPPVQVSVK	593	S	yes
Q9NYV4	Cyclin-dependent kinase 12 (EC 2.7.11.22) (EC 2.7.11.23) (Cdc2-related kinase, arginine/serine-rich) (CrkRS) (Cell division cycle 2-related protein kinase 7) (CDC2-related protein kinase 7) (Cell division protein kinase 12) (hCDK12)	0.10435	3	0.487591	43.03	TSAVSSQANSQPPVQVSVK	592	T	yes
Q9NZJ4	Sacsin (DnaJ homolog subfamily C member 29) (DNAJC29)	0.98537	3,4	1	68.809	YSNILLNCKVAK	3197	S	yes
Q9NZL9	Methionine adenosyltransferase 2 subunit beta (Methionine adenosyltransferase II beta) (MAT II beta) (Putative dTDP-4-keto-6-deoxy-D-glucose 4-reductase)	4.2977	2	1	41.399	MLDPSIK	243	S	yes
Q9P0M6	Core histone macro-H2A.2 (Histone macroH2A2) (mH2A2)	1.3949	2	0.999983	71.349	MSGRSGK	2	S	yes
Q9P0M9	39S ribosomal protein L27, mitochondrial (L27mt) (MRP-L27) (Mitochondrial large ribosomal subunit protein bL27m)	0.29615	3	1	78.342	KMASVVLALR	4	S	yes
Q9P1Y5	Calmodulin-regulated spectrin-associated protein 3 (Protein Nezha)	1.4512	3,4	0.499915	73.498	AVSKLSAALSSLQR	711	S	yes
Q9P1Y5	Calmodulin-regulated spectrin-associated protein 3 (Protein Nezha)	1.4512	3,4	0.499915	73.498	AVSKLSAALSSLQR	712	S	yes
Q9P1Y5	Calmodulin-regulated spectrin-associated protein 3 (Protein Nezha)	0.94528	2	0.979327	71.221	TSFAERKK	566	S	yes
Q9P1Y5	Calmodulin-regulated spectrin-associated protein 3 (Protein Nezha)	0.79108	3	0.927829	40.432	MTSFAERKK	565	T	yes
Q9P265	Disco-interacting protein 2 homolog B (DIP2 homolog B)	1.7735	2	0.999987	119.56	LKWVVTDSK	492	S	yes
Q9P270	SLAIN motif-containing protein 2	1.7348	3	0.998454	63.128	AGASIPSSGAASPR	63	S	yes
Q9P2D6	Protein FAM135A	1.326	3	0.987616	68.44	KASMKIPSR	34	S	yes
Q9P2J3	Kelch-like protein 9	0.061066	3	1	58.274	KIIDFIYTAK	112	T	yes
Q9P2J5	Leucine--tRNA ligase, cytoplasmic (EC 6.1.1.4) (Leucyl-tRNA synthetase) (LeuRS)	0.61933	3	0.999999	67.032	YTIYSPK	238	T	yes
Q9P2K1	Coiled-coil and C2 domain-containing protein 2A	2.878	3	0.831687	96.342	TRLLSMTVR	76	T	yes
Q9P2P6	StAR-related lipid transfer protein 9 (START domain-containing protein 9) (StARD9)	0.32111	3	0.978853	95.183	GRSSLQRSNGR	3966	S	yes
Q9P2P6	StAR-related lipid transfer protein 9 (START domain-containing protein 9) (StARD9)	5.139	3	0.880168	68.173	HGFLGAGVVSQPLSR	4553	S	yes
Q9P2R6	StAR-related lipid transfer protein 9 (START domain-containing protein 9) (StARD9)	1.4611	3	0.973171	71.153	SRGSMSTLR	577	S	yes
Q9P2R6	StAR-related lipid transfer protein 9 (START domain-containing protein 9) (StARD9)	0.51774	4	0.333221	46.706	GSMSTLRSGRK	580	S	yes
Q9P2R6	StAR-related lipid transfer protein 9 (START domain-containing protein 9) (StARD9)	0.51774	4	0.333221	46.706	GSMSTLRSGRK	582	S	yes
Q9P2R6	StAR-related lipid transfer protein 9 (START domain-containing protein 9) (StARD9)	0.51774	4	0.333221	46.706	GSMSTLRSGRK	583	T	yes
Q9UBD0	Heat shock transcription factor, X-linked	0.40681	3	0.96089	55.899	EDKRSLSMAR	8	S	yes
Q9UBD0	Heat shock transcription factor, X-linked	5.8161	3	0.978847	44.425	RSLSMAR	8	S	yes
Q9UBF6	RING-box protein 2 (Rbx2) (CKII beta-binding protein 1) (CKBBP1) (RING finger protein 7) (Regulator of cullins 2) (Sensitive to apoptosis gene protein)	4.3888	2	0.999987	70.056	SGGDKMFSLK	31	S	yes
Q9UBP9	PTB domain-containing engulfment adapter protein 1 (Cell death protein 6 homolog) (PTB domain adapter protein CED-6) (Protein GULP)	5.3576	3	0.999626	45.083	FLESGGKDVETRK	155	S	yes
Q9UBU7	Protein DBF4 homolog A (Activator of S phase kinase) (Chiffon homolog A) (DBF4-type zinc finger-containing protein 1)	1.8147	3	0.910991	92.051	TRTGRLK	210	T	yes
Q9UBU7	Protein DBF4 homolog A (Activator of S phase kinase) (Chiffon homolog A) (DBF4-type zinc finger-containing protein 1)	1.8697	3	0.940787	75.294	TRTGRLK	212	T	yes
Q9UBW7	Zinc finger MYM-type protein 2 (Fused in myeloproliferative disorders protein) (Rearranged in atypical myeloproliferative disorder protein) (Zinc finger protein 198)	1.206	2	1	80.239	KNPLTMENK	1253	T	yes
Q9UEY8	Gamma-adducin (Adducin-like protein 70)	5.9194	3	0.999402	41.08	TKITWMK	464	T	yes
Q9UF12	Hydroxyproline dehydrogenase (HYPDH) (EC 1.5.5.3) (Kidney and liver proline oxidase 1) (HsPOX1) (Probable proline dehydrogenase 2) (EC 1.5.5.2) (Probable proline oxidase 2)	0.11888	2	1	48.283	ITAPGLGK	48	T	yes
Q9UFE4	Coiled-coil domain-containing protein 39	0.076004	3	0.483336	48.314	EKAVLSEIEGTRSSLK	428	S	yes
Q9UFE4	Coiled-coil domain-containing protein 39	0.076004	3	0.483333	48.314	EKAVLSEIEGTRSSLK	429	S	yes
Q9UG63	ATP-binding cassette sub-family F member 2 (Iron-inhibited ABC transporter 2)	0.6355	2	1	54.539	KMPSDLAK	8	S	yes
Q9UG63	ATP-binding cassette sub-family F member 2 (Iron-inhibited ABC transporter 2)	0.6355	2	1	54.539	MPSDLAK	3	S	yes
Q9UGH3	Solute carrier family 23 member 2 (Na(+)/L-ascorbic acid transporter 2) (Nucleobase transporter-like 1 protein) (Sodium-dependent vitamin C transporter 2) (hSVCT2) (Yolk sac permease-like molecule 2)	5.1146	2	0.950704	51.276	MGIGKNTTSK	10	S	yes
Q9UGJ0	5'-AMP-activated protein kinase subunit gamma-2 (AMPK gamma2) (AMPK subunit gamma-2) (H91620p)	0.1593	3	0.913616	121.24	DVSSPGGSGGKK	16	S	yes
Q9UGJ0	5'-AMP-activated protein kinase subunit gamma-2 (AMPK gamma2) (AMPK subunit gamma-2) (H91620p)	0.60621	3	0.499421	77.42	DVSSPGGSGGKK	15	S	yes
Q9UGM6	Tryptophan--tRNA ligase, mitochondrial (EC 6.1.1.2) ((Mt)TrpRS) (Tryptophanyl-tRNA synthetase) (TrpRS)	0.43624	3	0.959625	47.039	MSKSDPDKLATVR	230	S	yes
Q9UGU0	Transcription factor 20 (TCF-20) (Nuclear factor SPBP) (Protein AR1) (Stromelysin-1 PDGF-responsive element-binding protein) (SPRE-binding protein)	2.2747	5	0.988926	43.184	EPPGAMTSTTSQKPGSNQGR	1474	S	yes
Q9UGU0	Transcription factor 20 (TCF-20) (Nuclear factor SPBP) (Protein AR1) (Stromelysin-1 PDGF-responsive element-binding protein) (SPRE-binding protein)	5.6828	3	0.709979	41.621	QSQDVKNSSTEDKGR	1278	T	yes
Q9UHB7	AF4/FMR2 family member 4 (ALL1-fused gene from chromosome 5q31 protein) (Protein AF-5q31) (Major CDK9 elongation factor-associated protein)	1.9531	3	0.824244	75.589	VTSKEDKLSSR	42	T	yes
Q9UHB7	AF4/FMR2 family member 4 (ALL1-fused gene from chromosome 5q31 protein) (Protein AF-5q31) (Major CDK9 elongation factor-associated protein)	0.013856	3	0.851126	52.79	VTSKEDKLSSR	43	S	yes
Q9UHB7	AF4/FMR2 family member 4 (ALL1-fused gene from chromosome 5q31 protein) (Protein AF-5q31) (Major CDK9 elongation factor-associated protein)	1.0604	4	0.997556	47.545	DLLPSPAGPVPSKDPKTEHGSR	814	S	yes
Q9UHB7	AF4/FMR2 family member 4 (ALL1-fused gene from chromosome 5q31 protein) (Protein AF-5q31) (Major CDK9 elongation factor-associated protein)	2.5981	3	0.754884	40.725	IESETPVDLASSMPSSR	586	S	yes
Q9UHD9	Ubiquilin-2 (Chap1) (DSK2 homolog) (Protein linking IAP with cytoskeleton 2) (PLIC-2) (hPLIC-2) (Ubiquitin-like product Chap1/Dsk2)	0.00057312	4	0.784484	111.4	SQNRPQGQSTQPSNAAGTNTTSASTPR	113	T	yes
Q9UHD9	Ubiquilin-2 (Chap1) (DSK2 homolog) (Protein linking IAP with cytoskeleton 2) (PLIC-2) (hPLIC-2) (Ubiquitin-like product Chap1/Dsk2)	0.00057312	4	0.49327	111.4	SQNRPQGQSTQPSNAAGTNTTSASTPR	112	S	yes
Q9UHD9	Ubiquilin-2 (Chap1) (DSK2 homolog) (Protein linking IAP with cytoskeleton 2) (PLIC-2) (hPLIC-2) (Ubiquitin-like product Chap1/Dsk2)	0.021622	3,4	0.414002	76.749	SQNRPQGQSTQPSNAAGTNTTSASTPR	123	T	yes
Q9UHD9	Ubiquilin-2 (Chap1) (DSK2 homolog) (Protein linking IAP with cytoskeleton 2) (PLIC-2) (hPLIC-2) (Ubiquitin-like product Chap1/Dsk2)	0.021622	3,4	0.414002	76.749	SQNRPQGQSTQPSNAAGTNTTSASTPR	124	T	yes
Q9UHD9	Ubiquilin-2 (Chap1) (DSK2 homolog) (Protein linking IAP with cytoskeleton 2) (PLIC-2) (hPLIC-2) (Ubiquitin-like product Chap1/Dsk2)	0.29553	3,4	0.302779	63.691	SQNRPQGQSTQPSNAAGTNTTSASTPR	121	T	yes
Q9UHD9	Ubiquilin-2 (Chap1) (DSK2 homolog) (Protein linking IAP with cytoskeleton 2) (PLIC-2) (hPLIC-2) (Ubiquitin-like product Chap1/Dsk2)	0.00057312	4	0.328074	60.735	SQNRPQGQSTQPSNAAGTNTTSASTPR	116	S	yes
Q9UHD9	Ubiquilin-2 (Chap1) (DSK2 homolog) (Protein linking IAP with cytoskeleton 2) (PLIC-2) (hPLIC-2) (Ubiquitin-like product Chap1/Dsk2)	0.24739	4	0.298461	58.891	SQNRPQGQSTQPSNAAGTNTTSASTPR	125	S	yes
Q9UHR5	SAP30-binding protein (Transcriptional regulator protein HCNGP)	0.86825	4	0.330269	61.767	KGTTTNATSTTTTTASTAVADAQK	231	T	yes
Q9UHR5	SAP30-binding protein (Transcriptional regulator protein HCNGP)	0.86825	4	0.330269	61.767	KGTTTNATSTTTTTASTAVADAQK	233	T	yes
Q9UHR5	SAP30-binding protein (Transcriptional regulator protein HCNGP)	0.86825	4	0.330269	61.767	KGTTTNATSTTTTTASTAVADAQK	232	T	yes
Q9UHV7	Mediator of RNA polymerase II transcription subunit 13 (Activator-recruited cofactor 250 kDa component) (ARC250) (Mediator complex subunit 13) (Thyroid hormone receptor-associated protein 1) (Thyroid hormone receptor-associated protein complex 240 kDa component) (Trap240) (Vitamin D3 receptor-interacting protein complex component DRIP250) (DRIP250)	0.86809	3	0.903516	80.231	SDSATKK	227	T	yes
Q9UHV7	Mediator of RNA polymerase II transcription subunit 13 (Activator-recruited cofactor 250 kDa component) (ARC250) (Mediator complex subunit 13) (Thyroid hormone receptor-associated protein 1) (Thyroid hormone receptor-associated protein complex 240 kDa component) (Trap240) (Vitamin D3 receptor-interacting protein complex component DRIP250) (DRIP250)	0.82798	2	0.976982	55.112	SDSATKK	225	S	yes
Q9UHV7	Mediator of RNA polymerase II transcription subunit 13 (Activator-recruited cofactor 250 kDa component) (ARC250) (Mediator complex subunit 13) (Thyroid hormone receptor-associated protein 1) (Thyroid hormone receptor-associated protein complex 240 kDa component) (Trap240) (Vitamin D3 receptor-interacting protein complex component DRIP250) (DRIP250)	2.7304	2	0.863266	49.536	SDSATKK	229	S	yes
Q9UHY8	Fasciculation and elongation protein zeta-2 (Zygin II) (Zygin-2)	1.5294	3	0.993352	42.813	LSMLSQEIQTLK	200	T	yes
Q9UIF9	Bromodomain adjacent to zinc finger domain protein 2A (Transcription termination factor I-interacting protein 5) (TTF-I-interacting protein 5) (Tip5) (hWALp3)	5.3544	4	0.999925	72.879	QETKSLKQK	742	T	yes
Q9UJ83	2-hydroxyacyl-CoA lyase 1 (EC 4.1.-.-) (2-hydroxyphytanoyl-CoA lyase) (2-HPCL) (Phytanoyl-CoA 2-hydroxylase 2)	3.0949	3	0.999447	48.115	MKSNEAASK	359	S	yes
Q9UJN7	Zinc finger protein 391	0.14103	2,3	0.995749	62.298	SSFENTVVRK	41	T	yes
Q9UJT9	F-box/LRR-repeat protein 7 (F-box and leucine-rich repeat protein 7) (F-box protein FBL6/FBL7)	0.58582	3	1	49.423	FVSDFGLR	338	S	yes
Q9UJY1	Heat shock protein beta-8 (HspB8) (Alpha-crystallin C chain) (E2-induced gene 1 protein) (Protein kinase H11) (Small stress protein-like protein HSP22)	0.1285	2,3,4	0.991971	50.353	LSSAWPGTLR	63	T	yes
Q9UJY1	Heat shock protein beta-8 (HspB8) (Alpha-crystallin C chain) (E2-induced gene 1 protein) (Protein kinase H11) (Small stress protein-like protein HSP22)	3.1498	3	0.876806	46.406	SGMVPRGPTATAR	66	S	yes
Q9UK59	Lariat debranching enzyme (EC 3.1.-.-)	0.30619	2	1	54.525	DKGQTAR	245	T	yes
Q9UKA2	F-box/LRR-repeat protein 4 (F-box and leucine-rich repeat protein 4) (F-box protein FBL4/FBL5)	0.63348	2	1	44.847	GEMMNTHR	34	T	yes
Q9UKD1	Glucocorticoid modulatory element-binding protein 2 (GMEB-2) (DNA-binding protein p79PIF) (Parvovirus initiation factor p79) (PIF p79)	3.0443	3	0.326949	47.242	VVSTLPSTVLGK	408	S	yes
Q9UKD1	Glucocorticoid modulatory element-binding protein 2 (GMEB-2) (DNA-binding protein p79PIF) (Parvovirus initiation factor p79) (PIF p79)	3.0443	3	0.326949	47.242	VVSTLPSTVLGK	404	T	yes
Q9UKD1	Glucocorticoid modulatory element-binding protein 2 (GMEB-2) (DNA-binding protein p79PIF) (Parvovirus initiation factor p79) (PIF p79)	3.0443	3	0.326949	47.242	VVSTLPSTVLGK	403	T	yes
Q9UKJ3	G patch domain-containing protein 8	2.6394	2	0.910281	43	DRSRSTR	995	S	yes
Q9UKJ3	G patch domain-containing protein 8	0.96871	3	0.968485	40.725	SHDSDDSDYASSKHRSK	908	S	yes
Q9UKL3	CASP8-associated protein 2 (FLICE-associated huge protein)	4.0579	2	0.965849	48.602	AKSDVSK	186	S	yes
Q9UKL3	CASP8-associated protein 2 (FLICE-associated huge protein)	1.8939	3	0.981827	45.653	KAKSDVSK	184	S	yes
Q9UKU6	Thyrotropin-releasing hormone-degrading ectoenzyme (TRH-DE) (TRH-degrading ectoenzyme) (EC 3.4.19.6) (Pyroglutamyl-peptidase II) (PAP-II) (TRH-specific aminopeptidase) (Thyroliberinase)	5.7339	3	1	77.318	WKILNTR	949	T	yes
Q9UKV3	Apoptotic chromatin condensation inducer in the nucleus (Acinus)	4.7396	3	0.444727	41.283	MPEAVGTDPSTSR	56	S	yes
Q9UKV3	Apoptotic chromatin condensation inducer in the nucleus (Acinus)	4.7396	3	0.444727	41.283	MPEAVGTDPSTSR	55	T	yes
Q9UL59	Zinc finger protein 214 (BWSCR2-associated zinc finger protein 1) (BAZ-1)	1.0241	3	0.999024	93.178	FLDSSQKR	22	S	yes
Q9ULB1	Neurexin-1 (Neurexin I-alpha) (Neurexin-1-alpha)	2.3492	3	1	42.718	SDLYIGGVAK	1024	S	yes
Q9ULD6	Protein inturned (Inturned planar cell polarity effector homolog) (PDZ domain-containing protein 6)	0.90789	4	0.889292	47.288	LQGTSKVATSPTCRR	684	S	yes
Q9ULD6	Protein inturned (Inturned planar cell polarity effector homolog) (PDZ domain-containing protein 6)	0.90789	4	0.972992	47.288	LQGTSKVATSPTCRR	689	S	yes
Q9ULG1	Chromatin-remodeling ATPase INO80 (hINO80) (EC 3.6.4.-) (DNA helicase-related INO80 complex homolog 1) (DNA helicase-related protein INO80) (INO80 complex subunit A)	0.12182	3	1	87.696	VLKEGGSLAAK	1043	S	yes
Q9ULH0	Kinase D-interacting substrate of 220 kDa (Ankyrin repeat-rich membrane-spanning protein)	0.67491	2	0.991365	82.279	STVLEMR	1272	T	yes
Q9ULL0	Acrosomal protein KIAA1210	2.2586	3	0.999968	47.429	KAKAWSHMAEITQ	1708	T	yes
Q9ULM0	Pleckstrin homology domain-containing family H member 1 (PH domain-containing family H member 1)	2.24	3	0.999112	50.791	MGSQVKTWK	590	S	yes
Q9ULV5	Heat shock factor protein 4 (HSF 4) (hHSF4) (Heat shock transcription factor 4) (HSTF 4)	0.90569	2,3	0.990285	70.919	LSPSSDGR	280	S	yes
Q9ULV5	Heat shock factor protein 4 (HSF 4) (hHSF4) (Heat shock transcription factor 4) (HSTF 4)	2.2179	3	0.626872	64.803	LSPSSDGR	281	S	yes
Q9UMN6	Histone-lysine N-methyltransferase 2B (Lysine N-methyltransferase 2B) (EC 2.1.1.43) (Myeloid/lymphoid or mixed-lineage leukemia protein 4) (Trithorax homolog 2) (WW domain-binding protein 7) (WBP-7)	1.1455	2,3	1	119.27	SVLTDKREK	2611	S	yes
Q9UMS5	Putative homeodomain transcription factor 1	0.048459	3	0.999794	69.864	LRKTVNGDGSR	168	T	yes
Q9UMS5	Putative homeodomain transcription factor 1	1.3277	3	0.936072	58.071	LRKTVNGDGSR	174	S	yes
Q9UMS5	Putative homeodomain transcription factor 1	2.5125	4	0.998505	45.972	PEIPWTSLTR	74	T	yes
Q9UNF1	Melanoma-associated antigen D2 (11B6) (Breast cancer-associated gene 1 protein) (BCG-1) (Hepatocellular carcinoma-associated protein JCL-1) (MAGE-D2 antigen)	0.50919	2,3	1	64.803	ALMASMAR	212	S	yes
Q9UPA5	Protein bassoon (Zinc finger protein 231)	0.026787	3	0.49101	58.671	HDATASSSSAAATVR	2652	S	yes
Q9UPA5	Protein bassoon (Zinc finger protein 231)	0.026787	3	0.49101	58.671	HDATASSSSAAATVR	2653	S	yes
Q9UPA5	Protein bassoon (Zinc finger protein 231)	2.1074	3	0.723761	52.254	SRLPRHSDSGSDSK	2643	S	yes
Q9UPN3	Microtubule-actin cross-linking factor 1, isoforms 1/2/3/5 (620 kDa actin-binding protein) (ABP620) (Actin cross-linking family protein 7) (Macrophin-1) (Trabeculin-alpha)	0.68353	3	0.960584	98.582	SKPSSRAASPTR	7222	S	yes
Q9UPN3	Microtubule-actin cross-linking factor 1, isoforms 1/2/3/5 (620 kDa actin-binding protein) (ABP620) (Actin cross-linking family protein 7) (Macrophin-1) (Trabeculin-alpha)	1.7806	3	0.997891	84.821	LVLDTVNEVSR	5621	T	yes
Q9UPN3	Microtubule-actin cross-linking factor 1, isoforms 1/2/3/5 (620 kDa actin-binding protein) (ABP620) (Actin cross-linking family protein 7) (Macrophin-1) (Trabeculin-alpha)	4.3341	2	0.777843	43.442	ATSSETK	1451	S	yes
Q9UPN3	Microtubule-actin cross-linking factor 1, isoforms 1/2/3/5 (620 kDa actin-binding protein) (ABP620) (Actin cross-linking family protein 7) (Macrophin-1) (Trabeculin-alpha)	3.1227	2	0.734283	42.718	ESTDIEK	1457	S	yes
Q9UPP5	AP2-interacting clathrin-endocytosis protein (APache)	1.3513	4	0.398044	41.287	DSVSEQKPHKPLINLASEISDAEALQSSCR	623	S	yes
Q9UPP5	AP2-interacting clathrin-endocytosis protein (APache)	1.3513	4	0.398044	41.287	DSVSEQKPHKPLINLASEISDAEALQSSCR	624	S	yes
Q9UPQ0	LIM and calponin homology domains-containing protein 1	4.8961	3	0.803651	47.088	KASVLDTSMSAGSGSPSK	526	S	yes
Q9UPQ4	Tripartite motif-containing protein 35 (Hemopoietic lineage switch protein 5)	2.4983	3	0.982742	49.482	EDDVSFLMKHKSR	258	S	yes
Q9UQ35	Serine/arginine repetitive matrix protein 2 (300 kDa nuclear matrix antigen) (Serine/arginine-rich splicing factor-related nuclear matrix protein of 300 kDa) (SR-related nuclear matrix protein of 300 kDa) (Ser/Arg-related nuclear matrix protein of 300 kDa) (Splicing coactivator subunit SRm300) (Tax-responsive enhancer element-binding protein 803) (TaxREB803)	5.727	2	0.999406	86.014	SRSRASPVSR	1911	S	yes
Q9UQ35	Serine/arginine repetitive matrix protein 2 (300 kDa nuclear matrix antigen) (Serine/arginine-rich splicing factor-related nuclear matrix protein of 300 kDa) (SR-related nuclear matrix protein of 300 kDa) (Ser/Arg-related nuclear matrix protein of 300 kDa) (Splicing coactivator subunit SRm300) (Tax-responsive enhancer element-binding protein 803) (TaxREB803)	3.6317	3	0.97746	72.096	TSPITRRR	1974	T	yes
Q9UQ35	Serine/arginine repetitive matrix protein 2 (300 kDa nuclear matrix antigen) (Serine/arginine-rich splicing factor-related nuclear matrix protein of 300 kDa) (SR-related nuclear matrix protein of 300 kDa) (Ser/Arg-related nuclear matrix protein of 300 kDa) (Splicing coactivator subunit SRm300) (Tax-responsive enhancer element-binding protein 803) (TaxREB803)	5.3876	2	0.81221	67.749	SASGSSSDRSR	2084	S	yes
Q9UQ35	Serine/arginine repetitive matrix protein 2 (300 kDa nuclear matrix antigen) (Serine/arginine-rich splicing factor-related nuclear matrix protein of 300 kDa) (SR-related nuclear matrix protein of 300 kDa) (Ser/Arg-related nuclear matrix protein of 300 kDa) (Splicing coactivator subunit SRm300) (Tax-responsive enhancer element-binding protein 803) (TaxREB803)	1.848	3	0.498501	64.82	RSASSPRTK	1749	S	yes
Q9UQ35	Serine/arginine repetitive matrix protein 2 (300 kDa nuclear matrix antigen) (Serine/arginine-rich splicing factor-related nuclear matrix protein of 300 kDa) (SR-related nuclear matrix protein of 300 kDa) (Ser/Arg-related nuclear matrix protein of 300 kDa) (Splicing coactivator subunit SRm300) (Tax-responsive enhancer element-binding protein 803) (TaxREB803)	1.848	3	0.498501	64.82	RSASSPRTK	1750	S	yes
Q9UQ35	Serine/arginine repetitive matrix protein 2 (300 kDa nuclear matrix antigen) (Serine/arginine-rich splicing factor-related nuclear matrix protein of 300 kDa) (SR-related nuclear matrix protein of 300 kDa) (Ser/Arg-related nuclear matrix protein of 300 kDa) (Splicing coactivator subunit SRm300) (Tax-responsive enhancer element-binding protein 803) (TaxREB803)	0.93669	3	0.999061	57.598	RSRSAQR	516	S	yes
Q9UQ35	Serine/arginine repetitive matrix protein 2 (300 kDa nuclear matrix antigen) (Serine/arginine-rich splicing factor-related nuclear matrix protein of 300 kDa) (SR-related nuclear matrix protein of 300 kDa) (Ser/Arg-related nuclear matrix protein of 300 kDa) (Splicing coactivator subunit SRm300) (Tax-responsive enhancer element-binding protein 803) (TaxREB803)	1.8052	3	0.62092	56.055	SATPPATRNHSGSRTPPVALNSSR	2092	T	yes
Q9UQ35	Serine/arginine repetitive matrix protein 2 (300 kDa nuclear matrix antigen) (Serine/arginine-rich splicing factor-related nuclear matrix protein of 300 kDa) (SR-related nuclear matrix protein of 300 kDa) (Ser/Arg-related nuclear matrix protein of 300 kDa) (Splicing coactivator subunit SRm300) (Tax-responsive enhancer element-binding protein 803) (TaxREB803)	1.8052	3	0.62092	56.055	SATPPATRNHSGSRTPPVALNSSR	2096	T	yes
Q9UQ35	Serine/arginine repetitive matrix protein 2 (300 kDa nuclear matrix antigen) (Serine/arginine-rich splicing factor-related nuclear matrix protein of 300 kDa) (SR-related nuclear matrix protein of 300 kDa) (Ser/Arg-related nuclear matrix protein of 300 kDa) (Splicing coactivator subunit SRm300) (Tax-responsive enhancer element-binding protein 803) (TaxREB803)	0.66073	3	0.62092	56.055	SATPPATRNHSGSRTPPVALNSSR	2090	S	yes
Q9UQ35	Serine/arginine repetitive matrix protein 2 (300 kDa nuclear matrix antigen) (Serine/arginine-rich splicing factor-related nuclear matrix protein of 300 kDa) (SR-related nuclear matrix protein of 300 kDa) (Ser/Arg-related nuclear matrix protein of 300 kDa) (Splicing coactivator subunit SRm300) (Tax-responsive enhancer element-binding protein 803) (TaxREB803)	2.5764	3	0.953451	43.635	SGSSQSTSR	1798	S	yes
Q9UQ35	Serine/arginine repetitive matrix protein 2 (300 kDa nuclear matrix antigen) (Serine/arginine-rich splicing factor-related nuclear matrix protein of 300 kDa) (SR-related nuclear matrix protein of 300 kDa) (Ser/Arg-related nuclear matrix protein of 300 kDa) (Splicing coactivator subunit SRm300) (Tax-responsive enhancer element-binding protein 803) (TaxREB803)	2.5764	3	0.827378	43.635	SGSSQSTSR	1791	S	yes
Q9UQ35	Serine/arginine repetitive matrix protein 2 (300 kDa nuclear matrix antigen) (Serine/arginine-rich splicing factor-related nuclear matrix protein of 300 kDa) (SR-related nuclear matrix protein of 300 kDa) (Ser/Arg-related nuclear matrix protein of 300 kDa) (Splicing coactivator subunit SRm300) (Tax-responsive enhancer element-binding protein 803) (TaxREB803)	2.1002	2	0.434108	43.604	KDRSGSSQSTSR	1795	S	yes
Q9UQ35	Serine/arginine repetitive matrix protein 2 (300 kDa nuclear matrix antigen) (Serine/arginine-rich splicing factor-related nuclear matrix protein of 300 kDa) (SR-related nuclear matrix protein of 300 kDa) (Ser/Arg-related nuclear matrix protein of 300 kDa) (Splicing coactivator subunit SRm300) (Tax-responsive enhancer element-binding protein 803) (TaxREB803)	2.1002	2	0.434108	43.604	KDRSGSSQSTSR	1794	S	yes
Q9UQ88	Cyclin-dependent kinase 11A (EC 2.7.11.22) (Cell division cycle 2-like protein kinase 2) (Cell division protein kinase 11A) (Galactosyltransferase-associated protein kinase p58/GTA) (PITSLRE serine/threonine-protein kinase CDC2L2)	2.7333	2	1	70.056	EDSMEDR	72;72	S	yes
Q9UQB3	Catenin delta-2 (Delta-catenin) (GT24) (Neural plakophilin-related ARM-repeat protein) (NPRAP) (Neurojungin)	0.59068	3	0.367986	62.055	SASAPASPREMISLK	1070	S	yes
Q9UQB3	Catenin delta-2 (Delta-catenin) (GT24) (Neural plakophilin-related ARM-repeat protein) (NPRAP) (Neurojungin)	0.59068	3	0.367986	62.055	SASAPASPREMISLK	1072	S	yes
Q9Y230	RuvB-like 2 (EC 3.6.4.12) (48 kDa TATA box-binding protein-interacting protein) (48 kDa TBP-interacting protein) (51 kDa erythrocyte cytosolic protein) (ECP-51) (INO80 complex subunit J) (Repressing pontin 52) (Reptin 52) (TIP49b) (TIP60-associated protein 54-beta) (TAP54-beta)	1.3659	3	0.999389	51.268	ATGKISK	199	T	yes
Q9Y230	RuvB-like 2 (EC 3.6.4.12) (48 kDa TATA box-binding protein-interacting protein) (48 kDa TBP-interacting protein) (51 kDa erythrocyte cytosolic protein) (ECP-51) (INO80 complex subunit J) (Repressing pontin 52) (Reptin 52) (TIP49b) (TIP60-associated protein 54-beta) (TAP54-beta)	1.3659	3	0.999389	51.268	KATGKISK	199	T	yes
Q9Y243	RAC-gamma serine/threonine-protein kinase (EC 2.7.11.1) (Protein kinase Akt-3) (Protein kinase B gamma) (PKB gamma) (RAC-PK-gamma) (STK-2)	5.651	3	0.999399	46.994	SDVTIVK	2	S	yes
Q9Y2M5	Kelch-like protein 20 (Kelch-like ECT2-interacting protein) (Kelch-like protein X)	2.0983	4	0.995525	48.907	TNQWSPVVAMTSRR	542	S	yes
Q9Y2U8	Inner nuclear membrane protein Man1 (LEM domain-containing protein 3)	3.2926	2	1	61.56	SGGRGNK	56	S	yes
Q9Y2W1	Thyroid hormone receptor-associated protein 3 (BCLAF1 and THRAP3 family member 2) (Thyroid hormone receptor-associated protein complex 150 kDa component) (Trap150)	1.0844	3	0.999999	93.556	MKSDSFAPK	390	S	yes
Q9Y2X0	Mediator of RNA polymerase II transcription subunit 16 (Mediator complex subunit 16) (Thyroid hormone receptor-associated protein 5) (Thyroid hormone receptor-associated protein complex 95 kDa component) (Trap95) (Vitamin D3 receptor-interacting protein complex 92 kDa component) (DRIP92)	2.4916	2	0.999908	45.653	SDDQDLTR	53	S	yes
Q9Y2Z4	Tyrosine--tRNA ligase, mitochondrial (EC 6.1.1.1) (Tyrosyl-tRNA synthetase) (TyrRS)	1.5455	2	1	50.034	RLAAEVTK	354	T	yes
Q9Y3E1	Hepatoma-derived growth factor-related protein 3 (HRP-3) (Hepatoma-derived growth factor 2) (HDGF-2)	0.42604	2,3	0.988519	50.791	SYTSKKSSK	149	S	yes
Q9Y3M8	StAR-related lipid transfer protein 13 (46H23.2) (Deleted in liver cancer 2 protein) (DLC-2) (Rho GTPase-activating protein) (START domain-containing protein 13) (StARD13)	4.5161	3	0.996989	76.927	SRLTHICRIDLK	1067	T	yes
Q9Y450	HBS1-like protein (ERFS)	0.073964	2,4	0.999989	62.081	KTMHKYEQESK	300	S	yes
Q9Y450	HBS1-like protein (ERFS)	0.073964	2,4	0.999989	62.081	TMHKYEQESK	299	S	yes
Q9Y473	Zinc finger protein 175 (Zinc finger protein OTK18)	4.5276	3	0.999479	45.084	SELLTHQKTHTR	348	S	yes
Q9Y485	DmX-like protein 1 (X-like 1 protein)	0.72946	3	0.999997	98.629	KSGGNSR	2785	S	yes
Q9Y485	DmX-like protein 1 (X-like 1 protein)	0.5243	3	0.997809	81.625	DDPTWSELR	1601	S	yes
Q9Y4A5	Transformation/transcription domain-associated protein (350/400 kDa PCAF-associated factor) (PAF350/400) (STAF40) (Tra1 homolog)	1.2319	3	0.499996	77.64	SKSEQESGNGRDVLMR	432	S	yes
Q9Y4A5	Transformation/transcription domain-associated protein (350/400 kDa PCAF-associated factor) (PAF350/400) (STAF40) (Tra1 homolog)	1.2319	3	0.499996	77.64	SKSEQESGNGRDVLMR	434	S	yes
Q9Y4A5	Transformation/transcription domain-associated protein (350/400 kDa PCAF-associated factor) (PAF350/400) (STAF40) (Tra1 homolog)	1.592	3	0.499609	63.662	EVTSPNSTVR	1251	S	yes
Q9Y4A5	Transformation/transcription domain-associated protein (350/400 kDa PCAF-associated factor) (PAF350/400) (STAF40) (Tra1 homolog)	1.592	3	0.496831	63.662	EVTSPNSTVR	1250	T	yes
Q9Y4A5	Transformation/transcription domain-associated protein (350/400 kDa PCAF-associated factor) (PAF350/400) (STAF40) (Tra1 homolog)	1.1432	3	1	57.52	ACQLPLFSYIVER	1139	S	yes
Q9Y4B5	Microtubule cross-linking factor 1 (Coiled-coil domain-containing protein 165) (PAR-1-interacting protein) (SOGA family member 2)	0.059274	3	1	96.331	QLTHELSK	663	T	yes
Q9Y4B5	Microtubule cross-linking factor 1 (Coiled-coil domain-containing protein 165) (PAR-1-interacting protein) (SOGA family member 2)	5.9269	2	0.999954	58.274	DSDAESDAGK	745	S	yes
Q9Y4E6	WD repeat-containing protein 7 (Rabconnectin-3 beta) (TGF-beta resistance-associated protein TRAG)	2.0967	3	0.852566	62.528	ISPDWISSMSIIR	162	S	yes
Q9Y4F5	Centrosomal protein of 170 kDa protein B (Centrosomal protein 170B) (Cep170B)	3.8897	3	0.99995	76.24	QPFSRARSGSAR	1235	S	yes
Q9Y4G6	Talin-2	3.2323	2	1	74.301	ALVEDTK	2031	T	yes
Q9Y4G6	Talin-2	3.0084	2,3	0.998574	53.947	LLVSGAASTPDK	2036	S	yes
Q9Y4W2	Ribosomal biogenesis protein LAS1L (Protein LAS1 homolog)	0.12182	3	1	86.011	FVNLISER	127	S	yes
Q9Y520	Protein PRRC2C (BAT2 domain-containing protein 1) (HBV X-transactivated gene 2 protein) (HBV XAg-transactivated protein 2) (HLA-B-associated transcript 2-like 2) (Proline-rich and coiled-coil-containing protein 2C)	0.9757	3	1	86.344	PRAEHIPSGPLR	1233	S	yes
Q9Y520	Protein PRRC2C (BAT2 domain-containing protein 1) (HBV X-transactivated gene 2 protein) (HBV XAg-transactivated protein 2) (HLA-B-associated transcript 2-like 2) (Proline-rich and coiled-coil-containing protein 2C)	2.3704	2,3	0.999974	81.703	MSEKSGQSTKAK	2	S	yes
Q9Y520	Protein PRRC2C (BAT2 domain-containing protein 1) (HBV X-transactivated gene 2 protein) (HBV XAg-transactivated protein 2) (HLA-B-associated transcript 2-like 2) (Proline-rich and coiled-coil-containing protein 2C)	2.3704	2,3	0.999974	81.703	SEKSGQSTK	2	S	yes
Q9Y592	Centrosomal protein of 83 kDa (Cep83) (Coiled-coil domain-containing protein 41) (Renal carcinoma antigen NY-REN-58)	4.0344	4	1	70.54	QNVPFEDYTR	605	T	yes
Q9Y592	Centrosomal protein of 83 kDa (Cep83) (Coiled-coil domain-containing protein 41) (Renal carcinoma antigen NY-REN-58)	0.74485	4	0.999952	48.467	SLEAEKQSANLR	257	S	yes
Q9Y5B6	PAX3- and PAX7-binding protein 1 (GC-rich sequence DNA-binding factor 1)	0.87999	3	1	47.712	LDSMKELHK	401	S	yes
Q9Y5V3	Melanoma-associated antigen D1 (MAGE tumor antigen CCF) (MAGE-D1 antigen) (Neurotrophin receptor-interacting MAGE homolog)	1.0344	3	0.980534	63.091	SAFKVQNATTK	85	T	yes
Q9Y5V3	Melanoma-associated antigen D1 (MAGE tumor antigen CCF) (MAGE-D1 antigen) (Neurotrophin receptor-interacting MAGE homolog)	1.9915	3	0.950312	49.368	SAFKVQNATTK	84	T	yes
Q9Y5X3	Sorting nexin-5	3.771	3	1	82.85	IKDSCVKADK	226	S	yes
Q9Y608	Leucine-rich repeat flightless-interacting protein 2 (LRR FLII-interacting protein 2)	2.445	3	0.996779	93.442	MQQKIDTMTK	468	T	yes
Q9Y616	Interleukin-1 receptor-associated kinase 3 (IRAK-3) (EC 2.7.11.1) (IL-1 receptor-associated kinase M) (IRAK-M)	3.9614	4	1	55.258	YIVPSQDLR	551	S	yes
Q9Y618	Nuclear receptor corepressor 2 (N-CoR2) (CTG repeat protein 26) (SMAP270) (Silencing mediator of retinoic acid and thyroid hormone receptor) (SMRT) (T3 receptor-associating factor) (TRAC) (Thyroid-, retinoic-acid-receptor-associated corepressor)	0.74335	2	0.499989	51.276	GSPVTTR	1570	T	yes
Q9Y618	Nuclear receptor corepressor 2 (N-CoR2) (CTG repeat protein 26) (SMAP270) (Silencing mediator of retinoic acid and thyroid hormone receptor) (SMRT) (T3 receptor-associating factor) (TRAC) (Thyroid-, retinoic-acid-receptor-associated corepressor)	0.74335	2	0.499989	51.276	GSPVTTR	1569	T	yes
Q9Y6D5	Brefeldin A-inhibited guanine nucleotide-exchange protein 2 (Brefeldin A-inhibited GEP 2) (ADP-ribosylation factor guanine nucleotide-exchange factor 2)	4.5955	3	0.966797	45.723	QESQTKSMFVSR	4	S	yes
Q9Y6D5	Brefeldin A-inhibited guanine nucleotide-exchange protein 2 (Brefeldin A-inhibited GEP 2) (ADP-ribosylation factor guanine nucleotide-exchange factor 2)	0.026079	3	0.944651	43.382	MQESQTKSMFVSR	4	S	yes
Q9Y6H5	Synphilin-1 (Sph1) (Alpha-synuclein-interacting protein)	4.9506	3	0.944736	56.215	LSLEFQDAQASSRNSK	649	S	yes
Q9Y6K5	2'-5'-oligoadenylate synthase 3 ((2-5')oligo(A) synthase 3) (2-5A synthase 3) (EC 2.7.7.84) (p100 OAS) (p100OAS)	3.9322	2	0.999717	69.314	GGSFGRGTDLR	461	S	yes
Q9Y6R6	Zinc finger protein 780B (Zinc finger protein 779)	0.34304	2	0.869879	48.188	KAFTLLTK	346	T	yes
Q9Y6R6	Zinc finger protein 780B (Zinc finger protein 779)	0.72944	3	0.97064	43.77	KAFTLLTK	343	T	yes
Q9Y6R9	Coiled-coil domain-containing protein 61	0.029964	3	1	65.246	SLKEELGR	154	S	yes
Q9Y6R9	Coiled-coil domain-containing protein 61	2.9081	2	0.894805	48.283	EDRASSSR	300	S	yes
Q9Y6R9	Coiled-coil domain-containing protein 61	2.9081	2	0.485395	41.109	EDRASSSR	301	S	yes
Q9Y6V0	Protein piccolo (Aczonin)	0.87722	3	0.998454	62.287	RDSSSSSLRLK	4244	S	yes
Q9Y6V0	Protein piccolo (Aczonin)	1.6763	5	0.856423	40.962	DYMSDSEVSSTRPTR	3776	T	yes
Q9Y6X0	SET-binding protein (SEB)	3.1856	3	0.819889	42.843	ESRETLSSSRQR	6	T	yes
Q9Y6X9	MORC family CW-type zinc finger protein 2 (Zinc finger CW-type coiled-coil domain protein 1)	3.8119	3	0.996336	55.717	PPSLPTPR	631	S	yes
Q9Y6X9	MORC family CW-type zinc finger protein 2 (Zinc finger CW-type coiled-coil domain protein 1)	1.0849	2	0.999974	55.314	EVPSPKVIKTPVVK	717	T	yes
