# Supplementary material for: A triarylphosphine–trimethylpiperidine reagent for the one-step derivatization and enrichment of protein post-translational modifications and identification by mass spectrometry
Source: Royal Society of Chemistry journal article supplement (doi:10.1039/c8cc08416e), 2018-01-01
Supplement: c8cc08416e4.xlsx [file c8cc08416e4.xlsx]

## Sheet: Combined three tests
O-GlcNAc Proteins	O-GlcNAc Peptides	Localization prob	Mass	|Mass error [ppm]|	Charges	Score	Delta score	DFIs
P31327	AFAMTNQILVEK	1	1363.72	1.2691	2;4	120.57	10.273	yes
Q9UNF1	ALMASMAR	1	849.42	4.734	2	55.531	21.609	yes
P46013	AMLTPKPAGGDEK	1	1313.66	0.8343	2	64.64	24.894	yes
Q9NR12	AQPVQSKPQK	1	1109.62	0.055336	3;4	85.522	42.724	yes
Q86VX9	ATDMQRKR	1	1004.52	0.29644	3	57.281	9.4324	yes
P53671	ATGKVMVMKELIR	1	1474.84	0.43801	3	64.04	13.952	yes
P40939	CLAPMMSEVIRILQEGVDPK	1	2228.14	0.1658	4	43.208	9.6195	yes
P60981	CSTPEEIKKR	1	1189.61	1.0731	3	45.28	12.585	yes
Q9BTT6	DEEDNETRTLLRR	1	1645.8	0.41917	3	40.493	10.89	yes
Q9UK32	DRNETMNMILKAK	1	1562.79	1.7785	3	74.853	20.367	yes
Q9P286	DSLPPRVKDLHK	1	1403.79	0.16513	3	55.314	21.725	yes
P28289	EDLVPYTGEKRGK	1	1490.77	0.38619	3	47.537	10.9	yes
Q5SSQ6	EEMAQRGCTKGPR	1	1461.68	0.42076	3	55.261	18.117	yes
Q86VE0	ELAGTLR	1	758.429	1.8696	2	94.262	22.123	yes
Q96IT1	EPLENGKAKLSFQCCECGK	1	2082.95	1.2158	4	44.848	12.594	yes
Q8IWJ2	EVQSLKEQHQK	1	1352.7	0.32501	4	58.699	16.456	yes
P52824	FTSRLHNKGVYVR	1	1575.86	0.51265	3	45.438	13.072	yes
P57103	GGDMSKTMYVDYK	1	1493.65	0.51265	3	43.68	16.582	yes
Q13501	GLHRGHTK	1	904.499	3.1297	2	48.561	16.527	yes
O60260	GQEMNATGGDDPR	1	1346.55	0.047213	2	44.312	23.363	yes
Q8TEU7	GSMVLPPCSFGK	1	1221.59	1.0091	3	51.771	13.181	yes
Q9C0E4	GSPPPTEPRR	1	1092.57	0.14193	3	52.5	11.559	yes
Q8NI35	IDTLKNDNIQALEK	1	1613.86	0.16564	3	42.785	10.039	yes
Q9Y6R6	KAFTLLTKLVR	1	1288.82	0.13997	3	40.727	14.653	yes
Q06455	KAHDMITTER	1	1200.59	1.2097	3	41.242	12.256	yes
P26599	KENALVQMADGNQAQLAMSHLNGHK	1	2704.32	0.35507	3	44.848	16.739	yes
Q9BZ95	KFPTAIFESK	1	1166.63	0.12983	4	40.941	16.024	yes
A8MWD9	KFSLKLNGGR	1	1118.66	0.58407	2	61.56	21.208	yes
Q8TDD2	KFTCLLCSKR	1	1197.64	1.8597	3	52.49	8.9328	yes
Q9UBW7	KNPLTMENKACLR	1	1516.79	2.274	2	48.115	19.566	yes
O14497	KQAPLTYEK	1	1076.59	0.85544	3	53.775	16.226	yes
Q8N4L4	KQTQPPK	1	825.471	3.5046	2	55.531	10.251	yes
Q15256	KSGKPVFIYK	1	1165.69	1.0826	2	56.632	22.546	yes
Q96S94	KVDLTHLEGEVEK	1	1495.79	0.35195	3	58.04	22.986	yes
Q15435	KVMLALPSVR	1	1112.67	4.1826	2	41.242	15.62	yes
Q5VWX1	KYLDVISNKNIK	1	1433.82	2.9525	2	49.632	25.406	yes
Q52WX2	LADFGMTR	1	909.438	0.62563	2	50.703	10.435	yes
Q9UL12	LDEYKRLMSLGK	1	1451.78	0.28161	3	51.252	11.467	yes
Q13670	LGLDWCLITMGK	1	1348.69	1.8913	2	45.653	14.697	yes
Q8NDH6	LKMDVCQKVDLLGASR	1	1774.94	0.91488	3	42.679	18.595	yes
P49802	LMKSDSYPR	1	1095.54	1.6155	4	49.418	13.793	yes
Q9Y5B9	MAVTLDKDAYYR	1	1444.7	0.21046	2	59.265	30.982	yes
O75394	MFLSAVFFAK	1	1159.61	0.44181	2	56.258	19.078	yes
A8MVM7	MKIAYKDTPR	1	1221.65	1.5681	2	69.03	22.151	yes
P78527	MKMIDSARK	1	1078.56	0.56938	2	42.19	9.8611	yes
Q6NYC1	MKYYIEYMESTR	1	1612.73	1.3941	3	40.616	11.804	yes
Q8NEZ4	MQNSAPRKQR	1	1214.63	0.31651	4	58.132	23.746	yes
Q9NRR8	MSEFWHK	1	963.427	0.055336	2	44.349	17.965	yes
P51606	MSKGLPAR	1	858.475	2.8681	3	42.336	14.564	yes
Q9BQ52	MWALCSLLR	1	1091.56	0.078699	3	58.981	17.901	yes
Q8TDB4	MYLRRAVSK	1	1122.63	0.23375	2;3	45.653	16.582	yes
Q14289	NFKLVKCTVQTEIR	1	1677.92	0.117	4	43.794	14.835	yes
A6PVC2	NSFELYGADFVLGR	1	1586.77	0.39976	3	59.227	19.666	yes
Q9NZM3	NTSGWWQGELQAR	1	1531.72	1.9902	3	50.222	22.951	yes
P36776	NYLDWLTSIPWGK	1	1591.8	1.3913	4	42.031	8.8889	yes
Q9Y618	QEINKKLNTHNR	1	1493.81	0.79491	2	49.081	25.369	yes
Q5VTJ3	QNLEALKEAAYKVMSENYLQVLR	1	2709.42	0.97906	4	40.384	12.085	yes
Q8WZ42	QPIETERSK	1	1086.57	2.3972	4	53.775	9.8289	yes
O60502	QVAHSGAK	1	796.419	0.24209	3;4	87.713	51.289	yes
Q494X3	RIHSSEKLYDCK	1	1477.73	0.33099	3	53.567	16.751	yes
Q93034	RTLWSLVAFPK	1	1316.76	2.9521	3	40.496	14.136	yes
Q9BXG8	SAEMPTISK	1	962.474	0.50392	5	40.724	17.268	yes
P42568	SAFKEPSR	1	920.472	1.6623	3	44.614	11.351	yes
Q33E94	SALYMHYLDFCEK	1	1618.72	0.41116	3	54.023	10.333	yes
Q15036	SGGSIRKMLR	1	1103.62	0.94065	3	47.187	17.214	yes
Q66GS9	SIAFRRQR	1	1032.59	0.22051	2	52.716	8.9083	yes
Q86UT8	SMVKGLDSYEEKEDK	1	1756.82	2.3177	4	43.761	10.214	yes
Q8N815	SVSYQAVEILERFMVKQAENICR	1	2712.37	2.8436	5	42.639	22.343	yes
Q96E11	TNSMNKLKK	1	1062.59	2.2062	4	56.205	22.516	yes
P29353	VEGGQLGGEEWTR	1	1416.66	0.42545	2	45.438	9.1453	yes
Q9NQV7	VNPGNTGKLFVGVGISR	1	1713.95	3.8441	4	44.312	11.854	yes
Q6ZU69	VPGEKESEK	1	1001.5	0.017536	2	82.426	29.7	yes
Q99848	VQTEVLQKRQQEK	1	1612.89	0.27985	3	46.88	8.434	yes
Q96B01	WVPPAASGGSR	1	1083.55	0.78321	3	50.034	12.969	yes
Q8NDV3	YSQNELEMIKK	1	1381.69	2.7642	3	47.844	9.849	yes
Q9Y4W6	ASIFKVHLRPLK	1	1407.87	1.7232	2	55.724	22.459	yes
O75147	DGQKVEESELLVVK	1	1571.84	1.3163	3	53.565	10.248	yes
P10243	DGSLNDGGNMALK	1	1290.59	0.15395	3	62.357	15.467	yes
Q9UKU6	DKWKILNTR	1	1172.67	2.1015	3	67.385	26.909	yes
Q6P3R8	ESKNPEQKYK	1	1249.63	0.5975	5	60.398	28.069	yes
Q96MX3	GHLVLTPFGIGDGRARPLK	1	2003.14	0.50507	3	56.339	22.148	yes
Q9H2S6	KIYMEIDPVTR	1	1363.72	0.69723	3	50.46	9.3506	yes
O95757	LNQTLKK	1	843.518	1.2034	2	78.77	14.013	yes
P22626	LTDCVVMRDPASK	1	1433.7	0.37475	3	43.794	13.655	yes
Q30201	MGPRARPALLLLMLLQTAVLQGR	1	2517.48	5.4377	3	51.566	25.58	yes
Q9NZL9	MLDPSIK	1	802.426	0.83825	3	51.346	17.47	yes
Q09666	MPKFNFSKPK	1	1222.65	0.19725	3	53.557	17.14	yes
Q15032	NLKPAVTK	1	869.533	3.8156	4	44.639	9.4612	yes
Q14C86	NLMAQLQETMR	1	1333.65	3.7261	3	63.624	17.214	yes
Q6NUK1	SDKMNIFGGFR	1	1270.61	0.5975	5	42.336	12.592	yes
Q15326	SEMEEEKR	1	1036.45	1.0826	3	63.216	21.34	yes
Q5KSL6	SGDHQGIVFLRK	1	1355.73	0.82613	4	51.727	8.1795	yes
Q99490	SRGAGALQR	1	914.505	5.498	2	74.464	11.046	yes
Q9Y3U8	VTKNVSKPR	1	1027.61	0.57162	3;4	64.224	29.574	yes
O75691	LFSVIKNKLSR	0.999994	1303.8	1.2806	2	69.721	22.759	yes
Q9ULL0	SKFQPQMSSK	0.999986	1166.58	5.6298	3	72.2	32.576	yes
A8MPX8	GPLLFSTSEPNLTK	0.999985	1502.8	1.1795	3	68.463	19.397	yes
O00566	DKALKSSQAFFSK	0.999978	1455.77	1.8602	4	55.261	18.81	yes
Q9Y2U8	NSPPNSLTPCLK	0.999963	1269.64	0.10554	3	46.796	20.978	yes
P21980	ISTKSVGR	0.999956	846.492	0.23375	3	72.2	20.475	yes
Q9Y6U3	NGTSKKGGQAPAPPTR	0.99995	1565.83	0.65773	2	53.3	16.143	yes
Q9Y2Y4	RFSLKHQMETHYR	0.999943	1731.86	1.7546	3	61.48	25.049	yes
Q01167	TPLGPLSSR	0.999933	926.519	0.25673	3	66.27	33.568	yes
Q99835	SNHPGLLSEKAASK	0.999928	1437.76	0.70561	4	47.726	10.684	yes
Q8WXI3	SHLEGSLPQALPR	0.999925	1403.75	1.8088	2;3	59.198	16.481	yes
Q10570	TPCRGATEGLSKK	0.999915	1346.7	0.45091	2	54.343	16.006	yes
Q12789	SDNKMGITPLR	0.999903	1230.64	0.62571	2	57.149	10.742	yes
Q9H5L6	HHSERTDMK	0.999891	1139.51	0.055336	2	72.607	23.264	yes
Q9Y4W6	KDDSHWWSR	0.999878	1215.54	1.7232	2	62.463	21.221	yes
Q9NR48	KLMSCPLAGLISK	0.999867	1359.76	2.1801	3	59.116	26.117	yes
Q9BX69	DSILSHKVLDEDSK	0.999863	1584.8	0.69848	4	54.343	18.216	yes
P58876	MPEPTKSAPAPK	0.999842	1252.65	0.65034	3	52.247	9.5393	yes
Q3V6T2	KITNLKITCEK	0.999828	1289.74	0.84522	3	63.624	28.876	yes
Q9NQL9	ISIPDDGCPFVSK	0.999815	1376.66	0.055336	3	58.172	22.515	yes
Q00610	TLQIFNIEMKSKMK	0.999791	1709.92	0.50434	3	56.414	8.64	yes
Q96RT1	TMNRLTQLER	0.999751	1260.66	3.568	3	55.721	13.725	yes
Q66GS9	SPDVLSLESRNK	0.99975	1343.7	0.24266	4	49.988	17.292	yes
Q8N0U4	VPSSLQAHLQLSGK	0.999632	1463.81	0.52364	3	75.088	36.67	yes
Q86X51	ITLVASALRRR	0.999628	1254.79	0.66905	2	59.418	14.334	yes
P61371	CSIGFSK	0.999567	740.353	0.56938	2	68.787	17.982	yes
Q14966	ETLKNVPFSELNLK	0.99946	1630.89	1.277	3	65.043	21.249	yes
Q5XX13	EKEEEKEENSLMEILSK	0.999446	2063.99	3.8924	3	53.981	17.396	yes
P48443	GLSNPSEVETLR	0.999439	1300.66	0.075057	3	62.813	18.472	yes
Q86T96	QSFQKSNSAKWPLPSCR	0.999374	1962.97	1.2	3	71.98	27.355	yes
Q9HCI5	MSLVSQNSRR	0.999372	1176.6	0.12881	3	41.242	8.1536	yes
Q9HC44	LTRRTTDR	0.999259	1017.57	0.015679	3	60.478	29.994	yes
Q8WWL7	ESFSQEPSALQKK	0.999117	1477.74	1.7184	3	54.65	20.476	yes
P78312	AVTGENNFTDTMR	0.999069	1454.65	2.3473	3	41.242	11.036	yes
P07196	SRFTVLTESAAK	0.998921	1308.7	0.0069274	4	61.265	24.972	yes
Q9H8H0	ESTSCPVVQK	0.998892	1076.52	2.482	3	56.013	15.772	yes
Q5FWF5	SQAKSSSESK	0.99889	1037.5	1.0306	2	64.73	11.163	yes
Q14140	MDLTELDHIMEVLVGS	0.998779	1800.86	4.632	4	41.577	13.925	yes
Q9UL36	HSRIHTGERPFHCTLCEK	0.998685	2150.03	1.6071	4	40.857	8.6661	yes
O00410	ENVNATENCISAVGKIMK	0.998637	1919.94	1.8554	3	55.011	22.757	yes
Q9UKI9	MSGDVADSTDAR	0.9986	1223.51	0.95721	3	61.344	32.386	yes
Q8NDZ0	QFFHLSLPSSWDDRR	0.998345	1889.92	0.094872	4	50.897	21.621	yes
P12757	QKCTCDSNLEKDK	0.998334	1510.68	1.714	2	50.354	25.854	yes
P56645	VRTSPLNEDVFATK	0.998328	1575.83	0.1254	3	52.821	10.565	yes
Q6IE81	MEPITKVSHIPSSR	0.998119	1580.83	3.1655	3	51.463	10.988	yes
P27816	ASPSKPASAPASR	0.998087	1225.64	0.24998	3;4	123.76	69.482	yes
Q9GZN7	MATVMAATAAER	0.99804	1221.58	2.6039	3	52.391	17.695	yes
Q5TIA1	NIEGSSGNTSLPLVLKKLLLSR	0.998033	2338.36	0.031642	3	49.066	27.218	yes
Q6P6B7	ATSTHLTALHYAAK	0.99802	1483.78	0.5975	3;4	70.089	10.784	yes
Q969U7	SIFIKYKSKPFCEK	0.997779	1716.93	0.78321	2	51.359	20.707	yes
Q9BSH4	MSAWAAASLSR	0.997618	1149.56	2.2066	3	48.998	10.216	yes
Q8TEA7	ESINLFCWTPK	0.997022	1336.65	1.0091	3	56.956	16.678	yes
Q9H379	PLASPIQHHEVTR	0.996868	1483.79	0.14193	2	45.28	10.512	yes
Q8IVE0	MRGRYEASQDLLGTLR	0.996312	1864.96	0.16766	3	58.32	11.91	yes
Q8WWL7	ITSEEESFYKK	0.99631	1359.66	0.16691	4	45.28	10.18	yes
Q96QE3	TGDEESKARDK	0.996244	1234.58	1.3391	2	54.343	10.841	yes
Q9HBL8	LVVVFGGTGAQGGSVAR	0.995278	1573.86	0.42808	3	49.216	11.218	yes
P62995	SGSAHGSGKSAR	0.995197	1100.53	0.65458	2	54.898	18.58	yes
Q8IXZ2	ASFPSSALPPR	0.994504	1128.59	0.11257	4	44.425	12.717	yes
Q92625	SQQIAALIEDHMTGK	0.994431	1640.82	0.63688	4	46.797	10.505	yes
Q9P2H0	SPVCEESYPSVTLR	0.994215	1565.74	0.39883	3	66.989	34.694	yes
Q9UBT6	DKPIAVGSMSMLSTSNYHARR	0.994161	2320.14	0.059877	3	53.504	8.9649	yes
Q9UKT8	HLSNNLETLLKR	0.994134	1436.81	0.17897	3	48.998	12.678	yes
P35658	SHLVHGSSPGVMGTSVATSASK	0.994009	2096.03	0.26788	2;3;4	181.61	103.3	yes
P02545	SVGGSGGGSFGDNLVTR	0.993875	1565.74	4.466	3	67.928	11.359	yes
Q86T24	RSYVCLTSLR	0.993811	1196.63	0.58892	3	44.132	16.701	yes
O75064	SAFNKLASSMGK	0.993666	1239.63	0.74364	3	47.991	12.519	yes
Q5JTH9	APAHHPAAISTAK	0.993438	1270.68	1.3342	3	56.551	21.372	yes
Q15048	ELSMGSSLLSGR	0.993231	1235.62	1.0786	2	55.721	37.389	yes
Q8TBB5	STGGPSGR	0.993018	717.341	1.8257	3	47.574	17.007	yes
Q86T82	LMLTLQDNSFLSIDK	0.992131	1736.9	5.0145	4	40.941	10.366	yes
A2A3N6	ASEVPYASGMPIKK	0.991838	1476.76	1.6222	2	48.277	9.3169	yes
P50607	RTKAAATAGGQGGAAR	0.991648	1442.77	0.25357	2	47.037	13.772	yes
Q8WZ42	VHIVIDKQSHMLLIEDMTK	0.991592	2249.19	2.102	3	45.618	12.721	yes
Q5T890	LPSHNKKNSTFIPR	0.991369	1637.9	0.70707	3	42.785	10.664	yes
P22033	NTYIFPPEPSMK	0.991229	1422.69	0.19404	2	45.653	9.9756	yes
Q9BYI3	ASLPHGPMKSNK	0.99115	1265.65	1.7689	2	43.03	13.486	yes
Q14814	SPPPPTHSTQLGAPSR	0.990925	1628.83	0.14088	4	65.956	65.956	yes
Q8WTR2	MYSLNQEIKAFSR	0.990764	1585.79	0.73249	3	42.843	12.771	yes
Q9H410	MTSVTRSEIIDEK	0.990227	1507.76	0.30581	3	59.975	28.301	yes
P0CF97	SADKLKTIPNDNTVSLR	0.989835	1871.01	0.063291	3	49.595	15.2	yes
Q9HCE3	GSPSSPAGSTPAIPK	0.989784	1352.69	0.094872	3	43.761	17.915	yes
Q9C0A1	SVLHQTRSRGTK	0.989739	1368.76	1.3272	5	43.897	21.071	yes
O14974	KFPTTATKISPK	0.989672	1317.77	0.25241	4	46.352	16.808	yes
Q14919	KNGGMGTKSK	0.9891	1006.52	2.5425	2	68.557	23.694	yes
O43491	KDSSQLGTDATK	0.988891	1249.62	5.2638	3	57.225	18.046	yes
P51610	TAAAQVGTSVSSATNTSTRPIITVHK	0.987715	2597.38	0.99082	4;6	77.43	45.513	yes
Q8TC07	KDPYTATMIGFSK	0.986989	1457.72	2.444	2	48.729	17.007	yes
O94886	SGENQIMMTK	0.986123	1137.52	2.2174	2	56.087	22.814	yes
P11532	SLSEVKSEVEMVIK	0.985978	1576.84	3.1294	4	41.912	10.031	yes
Q8WZ42	DAAYPPGPPSNPHVTDTTK	0.985911	1963.93	0.63688	3	42.059	13.228	yes
Q9NVR7	TFSFYKLETWLR	0.985758	1589.82	0.97345	3	57.885	17.508	yes
Q08495	SPGIISQASAPR	0.984776	1182.64	0.56718	4	58.817	8.7767	yes
O43242	MLPSTSRR	0.981674	946.502	0.4695	3	52.247	26.129	yes
A5YKK6	TVTVTRPTGVSFKK	0.981479	1519.87	1.5244	2	51.726	14.477	yes
P0C7W0	ASGAGGSWGR	0.981116	904.415	0.063291	2	56.551	17.8	yes
Q13427	EKSKQLESK	0.980825	1075.59	0.81728	3	64.73	8.1791	yes
Q6ZN04	RIQQQTHTYIVTPSR	0.979006	1826.98	0.38497	3	42.469	17.047	yes
Q9UKT5	TFWQSVSKER	0.978986	1266.64	1.3913	3	78.287	26.268	yes
Q6PDB4	IYSSVKSHILNKYR	0.978402	1706.95	0.14017	4	67.519	31.312	yes
Q9P270	FRSPAAPSPLALRQPVK	0.978171	1834.06	0.9405	4	45.54	18.799	yes
Q96PE3	GPSFKASSLK	0.976646	1020.56	5.878	2	58.699	23.157	yes
Q0IIN9	TSRGALSPSLGR	0.975978	1200.66	2.8766	4	43.68	10.682	yes
P51610	HSHAVSTAAMTR	0.974725	1267.61	1.8703	2;3;4	95.554	63.402	yes
P49790	SSSAGFSFGTGVINSTPAPANTIVTSENK	0.971279	2840.38	0.64788	4;5	137.58	117.88	yes
Q8TBY0	CIDGASIEVTLAKPVNKENTWR	0.971083	2443.25	0.73149	4	49.924	22.661	yes
P17097	AFSQSSSLIYHQR	0.970983	1522.75	0.16417	3	48.391	19.981	yes
Q9H089	KVSVSATPGHTK	0.97077	1210.67	1.1376	4	45.661	17.747	yes
Q7Z460	LCEIFTRMFADPHSK	0.970625	1793.86	0.11153	4	66.022	17.745	yes
Q86XT4	LGVIKGTASR	0.967626	1000.6	0.66905	2	67.334	32.463	yes
Q13416	NDPEITINVPQSSK	0.96612	1540.77	1.5679	2	50.874	17.957	yes
O75376	SAAVSEQQQLEQK	0.965707	1444.72	0.35901	3	161.26	161.26	yes
P40818	ELYTMMTDK	0.963484	1130.5	0.32408	3	47.302	10.729	yes
Q9H0E7	RFSSKPVVLTEAQK	0.962152	1588.89	1.136	3	43.594	11.98	yes
P49454	KEMSSIISLNKR	0.960796	1404.78	0.87965	3	47.971	8.9658	yes
Q96KR1	AGYSQGATQYTQAQQTR	0.96079	1857.86	0.58263	2;3;4;5	175.7	142.96	yes
O60682	LKTSLPWVPPDTKLSK	0.960223	1809.04	0.054343	4	45.347	21.318	yes
Q9NS91	SKFSPQKEASPAAK	0.960023	1474.78	0.28132	3	53.448	18.698	yes
Q9NYF0	MKPSPAGTAK	0.959092	986.522	0.27314	3	43.604	8.0631	yes
O43768	YPSLGQKPGGSDFLMKR	0.958787	1879.96	0.24209	3	54.103	19.265	yes
Q86T29	TYGCSDCAKAFFEK	0.956668	1568.66	0.50126	2	44.511	8.2183	yes
Q10713	FETKVTTLDNGLRVASQNK	0.956633	2120.12	0.78768	4	44.998	19.387	yes
Q9P265	MSHSAVNALCR	0.955759	1187.55	0.16513	2	57.106	9.062	yes
O15457	GLEYIEQLCIAEFSTVLMEVQSK	0.951082	2629.3	2.3771	4	42.639	13.809	yes
Q9UBT2	MHIFSMNMKSRFDIK	0.950368	1883.92	0.059877	3	52.52	23.797	yes
P56192	DALRSILTISR	0.947863	1243.72	0.51265	3	56.548	9.3052	yes
Q86UR5	ISSFTPKMQGR	0.942471	1250.64	0.30719	3	42.426	14.846	yes
Q03001	TIIQLKPRNSDCPLK	0.94171	1724.96	0.55046	4	56.746	21.875	yes
Q12955	SNINMYSSSLPFK	0.941612	1486.71	0.23653	3	47.039	19.357	yes
Q6N021	SAPSRTKQTENASQAK	0.941578	1702.86	0.5975	3	47.639	10.114	yes
Q99698	DKAASESIRVNR	0.940892	1344.71	0.24998	3	55.335	18.739	yes
Q9NV35	MTASAQPR	0.940861	860.417	0.28132	2	43.651	18.875	yes
P51610	ISVATGALEAAQGSK	0.939594	1401.75	0.19786	3;4	167.97	113.69	yes
Q14008	SMSGHPEAAQMVRR	0.938572	1555.73	3.0972	3	56.956	25.234	yes
O43889	VYVGGLESRVLKYTAQNMELQNK	0.93725	2639.37	0.55677	4	52.432	20.824	yes
Q99959	NMSSAGADGRKAMR	0.93674	1450.68	2.2066	2	59.345	30.718	yes
A4D256	NEVSSECGKK	0.936622	1079.49	2.3076	2	40.767	9.878	yes
Q8N9L7	TMTMSYKAIEK	0.935773	1301.64	1.4095	2;3	78.513	10.705	yes
Q12955	TKALTTSSCVDVKSR	0.934666	1594.83	0.074953	5	42.785	11.879	yes
Q8N103	HQSFTTKTEKGKPSR	0.933791	1730.91	1.393	4	53.504	24.9	yes
O60783	AAFMLGSLLRTFK	0.933381	1453.81	0.31473	2	44.612	11.695	yes
Q9P2I0	SQVEWMSDKLMR	0.929494	1508.71	1.9894	3	63.185	28.79	yes
Q8IZD2	DATASEK	0.928717	720.329	0.43067	2	104.75	27.006	yes
Q9BW19	GTLSGAPAPPTRHDFSFDR	0.914095	2027.98	2.7017	4	44.045	11.791	yes
Q12981	SMSGTIQLGR	0.912191	1048.53	1.4107	2	60.398	15.786	yes
Q9BYW2	TAEADTSSELAKK	0.910691	1349.67	1.7877	3	58.172	13.855	yes
P07814	THVADFAPEVAWVTRSGK	0.909743	1970	1.4591	3	43.696	14.373	yes
O00401	CVTMSSAVVQLYAADR	0.908949	1712.82	1.42	4	56.039	10.671	yes
Q9Y520	ESVTDYTTPSSSLPNTVATNNTK	0.9074	2426.14	0.45952	2;3;4	139.95	69.487	yes
Q9NYV4	TSAVSSQANSQPPVQVSVK	0.904832	1912.99	0.081794	3;4;5	86.084	53.128	yes
Q6N021	AAAEKLSSLENSSNKNEK	0.902904	1918.96	0.18759	3	55.975	9.6231	yes
Q14315	TERTEISKTR	0.901383	1219.65	2.3103	2	54.066	12.824	yes
Q16543	SMVNTKPEKTEEDSEEVR	0.899172	2106.97	1.9794	4	46.156	13.79	yes
Q9NVP4	MTAGSVCVPQIIPLR	0.893768	1583.85	0.45983	2	41.996	8.4068	yes
Q7Z3J3	EGFSIPVSADGFK	0.889833	1352.66	0.0046228	3	112.24	75.291	yes
Q93052	STGEPLGHVPAR	0.887721	1219.63	0.55457	2;3;4	132.56	76.81	yes
Q9NSC2	GQPSRPTKSK	0.887148	1084.6	0.82682	3	44.968	10.762	yes
Q9UJF2	FQTITILPMEQYK	0.884534	1610.84	1.7785	3	42.843	12.535	yes
A8CG34	APPTLQAETATKPQATSAPSPAPK	0.884201	2359.24	0.33186	5	55.705	29.658	yes
Q15054	SKLAVTASIHVYSIQKAMLK	0.884077	2187.24	0.67137	3	50.202	12.318	yes
Q86YV0	ALSHQEPMVSTQPAPRSIFRR	0.876356	2407.25	0.073992	4	41.513	17.649	yes
Q9UKY1	SQVPAAQPTAETKPATAAVPTSQSVK	0.875372	2564.34	5.6557	4	52.69	22.335	yes
A6NCS4	MLLSPVTSTPFSVK	0.873891	1505.82	0.0046228	3	42.947	16.11	yes
Q13114	HLGDAFKPDPNSSSFK	0.873141	1745.84	0.58892	3;4	60.196	29.953	yes
Q8IVM0	TAKAANSKSK	0.872157	1004.56	0.96285	2	56.205	13.487	yes
Q7Z309	KGEMETESQPK	0.86769	1262.58	0.017536	2	53.448	12.048	yes
O95628	SNPVIPISSSNHSAR	0.86389	1564.8	0.83438	4	86.453	52.903	yes
P35658	ASSTSLTSTQPTK	0.862169	1307.66	0.0061482	3;4	165.89	122.28	yes
Q8N3D4	SGGREANTKR	0.860035	1074.55	2.2029	5	46.063	14.914	yes
Q96FV9	SYKLDDTQASR	0.85698	1282.62	5.8052	3	59.116	8.9218	yes
Q15648	SPSHSSSNRPFTPPTSTGGSK	0.856063	2115	2.1507	5	47.729	20.979	yes
Q8IWR0	MSNVSEERRK	0.852884	1234.61	1.2753	2	61.233	30.235	yes
Q01082	HEVSASTQSTPASSR	0.852668	1543.72	0.074766	2;3;4	127.88	90.074	yes
Q9BYZ2	DLNSDIGTDKDPEQWK	0.846571	1859.85	0.52364	4	43.592	15.427	yes
Q9ULU4	FQTSSQK	0.844974	824.403	2.4667	3	50.034	13.289	yes
P07202	AAEIMETSIQAMK	0.844894	1421.69	0.063291	3	47.037	16.474	yes
Q5T6F2	GGYAGSSQAPNK	0.838882	1135.53	0.038144	3	62.077	32.31	yes
Q8N3V7	AASPAKPSSLDLVPNLPK	0.837483	1804.01	0.090046	3	57.288	27.045	yes
Q13769	MSSESSK	0.837238	754.317	2.4864	3	50.12	12.474	yes
P30622	KVQAEDEANGLQTTPASR	0.829983	1913.94	0.3237	2;3;4	86.073	50.417	yes
Q09472	MESTETEERSTELK	0.825809	1668.75	0.42599	4	45.28	13.791	yes
Q9UHR5	GTTTNATSTTTTTASTAVADAQK	0.822658	2199.05	0.38417	4	77.917	81.491	yes
Q9BZE2	QTSAFVEGVKMR	0.819415	1351.69	0.045159	3	53.448	17.031	yes
Q96HC4	EVVKPVPITSPAVSK	0.818521	1549.91	0.16701	2;3;4	113.23	88.778	yes
Q6ZQQ6	LMALRISGSQTK	0.817215	1303.73	0.23022	3	61.409	16.87	yes
P25686	SASADDIKK	0.814223	933.477	0.61919	2	42.864	9.6018	yes
Q96MY7	SQAMSKSVTLRAK	0.809004	1405.77	2.52	3	43.208	17.226	yes
Q5MJ08	MKSPCESNKR	0.80482	1178.55	0.08746	2	56.087	16.465	yes
Q9NXG0	TTMTKVK	0.80444	807.452	0.7361	2	57.859	17.59	yes
Q99623	KISSPTGSK	0.80407	903.503	0.17846	3	42.864	10.712	yes
O14497	GGTPGSGAAAAAGSKPPPSSSASASSSSSSFAQQR	0.802727	3092.44	1.8554	5	60.95	32.339	yes
Q96Q89	KIIETMSSSKLSNVEASK	0.801887	1951.03	1.3391	4	40.857	9.768	yes
Q6P0N0	TPQCQHVSPGMLGSINR	0.79785	1823.88	4.4349	4	61.096	19.696	yes
Q8IZD9	KDFEVVDSDQISVSDLYK	0.797623	2086.01	0.38048	4	43.37	13.602	yes
P51587	QTENLKTSK	0.796581	1047.56	0.25357	2	61.344	8.9532	yes
Q9BVI0	SKGDSDPKPGSPK	0.793698	1298.65	0.32019	3	46.88	8.9114	yes
P52594	SSSADFGTFNTSQSHQTASAVSK	0.793178	2344.06	0.0046228	3;4	137.26	97.964	yes
Q9Y2Z2	RQSAMNESSK	0.793107	1136.52	0.53074	3	40.727	10.419	yes
P05388	AFLADPSAFVAAAPVAAATTAAPAAAAAPAK	0.792531	2751.46	5.1572	3;4	97.295	23.462	yes
O60318	SPTSVGAFPSTSAFGQEAGEIVNSGFGK	0.791261	2728.3	0.24209	4	50.627	17.912	yes
O15047	GSTPYSQDSAYSSSTTSTSFKPR	0.790173	2441.1	0.025542	4	109.71	75.28	yes
Q8N8S7	GSTIETEQKEDKGEDSEPVTSK	0.786443	2393.11	0.1109	4;5	84.312	55.369	yes
Q9NPG3	TPASSSSALSHPAKPHSVSSAGSSYK	0.786234	2527.23	0.45983	6	44.474	22.377	yes
Q14232	RFSVYVTESQPDLSGK	0.772609	1811.91	1.8314	4	42.639	11.551	yes
Q99700	RMSSEGPPRMSPK	0.771772	1458.71	2.0024	3	47.062	9.8818	yes
Q6ZRS2	AETQGANHTPVISAHQTR	0.768206	1916.95	0.041895	4;5	78.419	42.448	yes
Q92930	KMNDSNSAGAGGPVK	0.765048	1431.68	2.3972	3	46.704	16.373	yes
Q5HYW2	KSSLPPTSPMEK	0.763378	1300.67	0.25483	3	54.772	16.804	yes
A8MXQ7	EAEAERMTLKVQQLTR	0.763263	1902	0.4245	3	49.216	14.365	yes
Q7Z417	TIQNSSVSPTSSSSSSSSTGETQTQSSSR	0.76299	2891.29	1.3664	4	84.509	63.903	yes
Q7Z739	IGGDLTAAVTK	0.762883	1044.58	0.6967	3	77.633	31.57	yes
P17544	SAAEAVATSVLTQMASQR	0.757409	1819.91	0.81205	3;4	119.43	83.667	yes
Q9Y263	TSGATRYR	0.755121	910.462	1.2158	3	49.3	11.751	yes
Q68DX3	MQPLTKDAGMSLSSVTLASALQVR	0.754877	2503.31	0.55371	3	42.908	12.333	yes
Q5S007	MSYSGRVKTLCLQK	0.75248	1612.84	0.10515	2	45.357	18.326	yes
O75376	SSSGYPPNQGAFSTEQSR	0.750683	1898.84	0.14088	3	61.477	34.215	yes
Q6ZWC4	LGYSSDVLSARPTMSPTEMLR	0.749969	2310.13	2.1241	3	46.337	18.656	yes
Q9NX95	SSLADKDK	0.749413	862.44	0.52369	3	66.351	14.823	yes
Q96T21	TPHNPLDSSAPLMKK	0.74612	1634.85	1.7776	3	48.532	8.7859	yes
Q4VXU2	EFSPYGVITSAK	0.745201	1297.66	0.11941	4	53.377	12.151	yes
O15090	GSGSDQESQSVSR	0.744813	1322.57	0.39929	3	77.192	45.595	yes
Q8N3X1	ATEISTAVVQR	0.740388	1173.64	0.090046	3	98	54.581	yes
Q8N392	TGTTRIGDLAPQDMKK	0.737473	1730.9	0.86345	3	47.774	8.7962	yes
Q7Z3T8	STIPVQQGLPTSK	0.735947	1354.75	0.70838	3	74.726	41.323	yes
Q9P2K9	VCMAPPGCLLSSSPDGPTK	0.728999	1858.86	3.0912	4	46.156	22.498	yes
Q5EBN2	ERVELIEKVITMQTR	0.725846	1844.02	2.2745	3	55.724	18.037	yes
Q6P4R8	ASSASAPSSTPTGTTVVK	0.722761	1647.83	1.3391	3	89.47	53.019	yes
O75820	TFSVSAHLVQHQR	0.713943	1508.78	0.45795	3	53.3	16.883	yes
Q9H425	RFTYFSSLSPMAR	0.70077	1561.77	1.8698	3	54.812	16.512	yes
Q14157	SPAVATSTAAPPPPSSPLPSK	0.693973	1959.03	0.12021	2;3;4	186.74	112.16	yes
Q14247	NASTFEDVTQVSSAYQK	0.690122	1873.87	0.117	3	117.22	88.937	yes
P48382	TAEVPVSEASGQAPPAK	0.689685	1637.83	0.1862	3;4	74.657	44.131	yes
O15047	QDTPSSFGQFTPQSSQGTPYTSR	0.688544	2503.13	0.064451	4	47.472	15.187	yes
P12270	GIASTSDPPTANIKPTPVVSTPSK	0.688353	2364.25	0.21904	3;4	85.224	57.552	yes
Q16186	SQSAAVTPSSTTSSTR	0.685772	1566.75	0.04512	2;3	179.55	95.26	yes
Q6P4R8	IQTVPASHLQQGTASGSSK	0.680293	1895.97	4.2683	3;4	78.531	37.878	yes
Q9BYJ9	IGDVSSSAVK	0.677351	961.508	0.13997	2;3	86.803	29.628	yes
P35658	NNPATPSTAMGSSVPYSTAK	0.674979	1979.93	0.076043	2;3;4	139.2	95.694	yes
Q9UKV8	KLTDNQTSTMIRATAR	0.670658	1805.94	2.1823	3	46.66	17.792	yes
Q8N9K5	QHSQLTVHQRIHTGEKPYECKECGK	0.668302	2935.42	0.42808	4	42.705	15.856	yes
Q8WWM7	STSTPTSPGPR	0.667369	1086.53	1.6031	3	63.694	35.613	yes
Q4KWH8	CMSVMQSGTQMIK	0.666915	1442.64	0.84522	2	42.242	12.442	yes
Q15750	VYPVSVPYSSAQSTSK	0.665222	1698.85	0.37174	3	95.429	48.908	yes
P30305	KSEAGSGAASSSGEDK	0.664161	1466.65	1.5955	2	44.44	16.914	yes
A8MXT2	ASYPSSPASAVSLTSSDEGAKGQK	0.663248	2324.11	4.7289	3	53.957	53.957	yes
O14727	CCSWSADGARIMVAAKNK	0.662365	1909.9	0.25241	3	45.873	14.379	yes
Q15942	VSSGYVPPPVATPFSSK	0.662316	1718.89	0.31933	4	90.765	62.999	yes
Q86U70	SENPTSQASQ	0.66127	1047.45	1.4417	2	101.38	65.935	yes
Q5VT52	SAVSTSVPTKPTENISK	0.659144	1744.92	0.18601	5	68.406	39.043	yes
P51610	VMSVVQTKPVQTSAVTGQASTGPVTQIIQTK	0.658121	3183.72	4.5204	4	46.15	29.685	yes
Q96L91	SLVPQVSQATGVQLPGK	0.649518	1707.95	2.2785	4	43.463	19.184	yes
Q9BTC0	VLSSLKPAAPSPATAATTAAAASTAASSTASSASK	0.642332	3102.6	0.15395	4;5	63.305	45.9	yes
P45974	MFKALIGKGHPEFSTNR	0.64174	1932	0.62963	4	48.351	18.623	yes
Q6IV72	RFTRPSKLACHTR	0.638911	1571.85	1.3731	3	46.955	21.545	yes
P49790	IGVSSDSGSINPMSEGFK	0.635471	1810.84	0.048199	3;4	82.761	51.816	yes
Q6ZSR3	MGWRFPSPSPR	0.632075	1316.64	0.017536	3	56.548	13.705	yes
Q9Y2M0	TNLTPGQSDSAKR	0.629399	1373.69	1.0794	3	40.493	9.6353	yes
Q9H7H1	LSLGVAETAAVMSLLTRT	0.627335	1832.01	0.63225	4	47.64	22.097	yes
Q96CD2	SRSDPVLHIDLRR	0.624066	1562.86	1.6609	3	72.29	19.257	yes
Q9HCD5	TQPSSQPLQSGQVLPSATPTPSAPPTSQQELQAK	0.619698	3485.76	1.0691	5	55.964	36.855	yes
O94842	GLQLGQTSTATIQPSQQAQIVTR	0.618559	2425.29	0.074271	2;3;4	134.8	78.624	yes
O75376	SSHLEVSQASQLLQQQQQQQLR	0.61837	2563.31	0.35901	4	105.52	69.087	yes
Q9UQR0	NPMYIHTSVSQDFSR	0.613517	1780.82	0.30122	3;4	67.644	32.896	yes
P51610	SGTVTVAQQAQVVTTVVGGVTK	0.606573	2129.17	0.49427	3;4	65.495	42.173	yes
P51610	YDIPATAATATSPTPNPVPSVPANPPK	0.60033	2673.36	2.0213	4	59.789	32.346	yes
P46019	MTGRPTLTFPISR	0.598148	1475.79	0.075057	3	47.942	13.974	yes
Q8N7Q3	ASNSSSKLMEHK	0.597985	1317.63	0.69723	3	57.267	12.725	yes
Q02790	KIVSWLEYESSFSNEEAQK	0.59605	2273.09	0.91488	4	50.188	20.049	yes
Q9ULH7	VSESPSPVTTNTPAQFASVSPTVPEFLK	0.592115	2916.48	1.3404	4	65.056	39.635	yes
Q9Y2T1	QSKPKPHSAQSTKKAYPLESAR	0.589672	2438.3	2.397	3	41.615	9.8482	yes
O95947	ELWKEFSSVGTEMIITK	0.587569	1997.02	4.466	4	57.366	9.4726	yes
Q13620	MAEESSSSSSSSSPTAATSQQQQLK	0.583416	2543.13	0.30731	3;4	114.92	83.512	yes
Q9NXV6	SSSSTNTSLLTSK	0.583016	1311.65	0.070557	3	129.36	87.82	yes
Q9NYD6	TEQSLAGPKGSPSESEK	0.581951	1730.83	0.14134	4	51.771	15.026	yes
Q96MF7	SSSNSGSTGFISFSGVESALSSLK	0.579426	2335.12	2.52	4	45.363	11.774	yes
Q9P219	SSPTHDTPSCR	0.578877	1186.5	0.68674	3	56.414	23.711	yes
P49790	FGVSSSSSGPSQTLTSTGNFK	0.573186	2074.98	#VALUE!	3;4;5	131.26	101.54	yes
Q12830	GQPVSTAVSAPNTVSSTPGQK	0.568977	2012.02	0.025551	2;3;4;5	97.388	64.858	yes
Q14684	TPTSSPASSPLVAK	0.564779	1341.71	0.052658	3	82.774	39.744	yes
Q09666	GPQVSSALNLDTSK	0.563344	1415.73	0.43275	3	151.41	123.25	yes
Q9Y618	GSPVTTREPTPR	0.562983	1296.68	0.61058	4	55.98	21.059	yes
Q5T1B0	MSLPKTPSTPLNSTSTSESKK	0.562657	2220.13	0.29053	4	43.326	14.577	yes
Q13029	MQSMQTPLGKTRAR	0.55828	1603.83	1.1917	3	52.172	16.681	yes
Q5VT52	SLFSPQNTLAAPTGHPPTSGVEK	0.558218	2335.18	0.43925	4	85.881	62.116	yes
Q12830	VMVAPISGSVTTGTK	0.557889	1446.78	0.34765	3	88.637	43.279	yes
O75179	IGSSAPTTTAANTSLMGIK	0.551662	1819.93	0.20987	4	61.141	25.214	yes
P04150	VSASSPSLAVASQSDSK	0.550169	1619.8	0.073992	3;4	114.87	73.759	yes
Q14157	SSVATTSGK	0.548279	836.424	0.42596	3	74.698	43.276	yes
P18846	TTPSATSLPQTVVMTSPVTLTSQTTK	0.540977	2676.39	1.3667	4	62.678	41.756	yes
O95391	SATVVDAVNAAPLSGSK	0.540515	1585.83	2.1124	3	64.705	10.362	yes
Q9Y6R0	SRSAAASGGPRRPER	0.537206	1553.81	1.0932	4	52.365	15.194	yes
Q14004	TENQHVPTTSSSLTDPHAGVK	0.535176	2205.07	0.074951	5	85.737	57.382	yes
P49790	STEANVLPPSSIGFTFSVPVAK	0.533638	2247.18	0.24169	4	45.137	15.91	yes
Q96KR1	STAPAVAYDSK	0.532917	1108.54	0.18759	3	98.253	69.182	yes
Q9Y520	AVSEMSTEIGTMISVSSAEYGTNAK	0.5329	2562.18	2.4936	4	74.561	41.764	yes
P02545	ASASGSGAQVGGPISSGSSASSVTVTR	0.532075	2364.15	0.017536	2;3;4	106.33	54.752	yes
Q6MZP7	TITISESGVIGSTLNSTTQTPNK	0.529269	2348.21	0.18759	4	91.964	38.956	yes
Q14157	QAFTPSSTMMEVFLQEK	0.519136	1972.93	0.44211	3;4	109.44	72.451	yes
Q9P013	EHTTSSSVSKKPR	0.509172	1442.75	0.58635	4	42.843	12.637	yes
Q9Y2K1	AVLAACSSYFR	0.5	1186.58	1.5292	2	56.404	23.546	yes
O60518	CANSKTKK	0.5	878.464	0.10221	2	75.109	38.552	yes
Q96LZ7	EAQKEMQKIMTSLK	0.5	1663.86	1.5999	3	46.873	8.497	yes
Q15942	GPPASSPAPAPK	0.5	1075.57	0.31933	3	69.258	36.445	yes
Q14BN4	QSITDELKQCK	0.5	1291.64	1.7721	2	57.106	8.5741	yes
Q9BQW3	RAADVAEALYSTPR	0.5	1518.78	0.66905	4	46.063	17.251	yes
P45974	TMTELEIDMNQR	0.5	1479.67	0.29706	3	43.68	16.007	yes
P20929	TTELPQQR	0.5	971.504	1.3667	2	57.177	11.049	yes
Q14814	VITSQAGK	0.5	802.455	0.058716	2	71.153	31.28	yes
Q96ST2	WNVEMESSR	0.5	1136.49	2.0178	2	55.353	22.737	yes
Q562F6	KVNKMTSK	0.5	934.527	1.7494	2	69.198	21.282	yes
P49750	TSMFKTFK	0.499827	988.505	1.0239	2	67.169	14.767	yes
P49796	MMKSFKPTSEEALK	0.499271	1625.82	0.20961	2	46.159	11.939	yes
Q6ZS92	CMNTSIHAHTYAR	0.498996	1503.67	0.84893	3	40.475	14.493	yes
Q9ULG1	STAGSAAAMAGAK	0.496581	1092.52	1.6071	3	56.551	12.9	yes
Q8IVL0	LFGAKAGGKSASAPNTEGVK	0.484075	1889	0.073992	3	42.708	14.741	yes
P27540	HSNPTQGATPTWTPTTR	0.47822	1851.89	0.65097	2;4	106.73	54.004	yes
Q9ULE0	SLDTPQSLASLSSR	0.476019	1460.75	0.89313	3	63.462	33.525	yes
Q6P4R8	SGPSTVSEPAK	0.475955	1058.52	0.2865	3	76.868	38.154	yes
Q8IV63	KVKWSSTVTSPR	0.473994	1374.76	0.96298	3	54.898	12.687	yes
Q8WWI1	TSTTGVATTQSPTPR	0.4727	1503.75	0.097973	3	95.554	68.529	yes
Q9H582	TFMKDSVVGSSK	0.472114	1284.64	2.482	2	44.132	10.516	yes
Q96H12	RSVSPLLSTHVLGK	0.470483	1492.87	0.35942	3	44.391	12.507	yes
Q04726	NDAPTPGTSTTPGLR	0.466616	1483.73	0.59773	3	92.679	56.828	yes
Q7Z589	TITVPVSGSPK	0.46456	1084.61	0.87715	2;3	79.089	43.378	yes
Q08AH1	TLDPMVIFFTSGTTGFPK	0.463946	1957.99	0.37385	3	51.524	18.822	yes
P39880	QAPLSQSDITILTPK	0.459616	1610.89	1.1352	3	64.89	13.423	yes
Q9HCX3	SCTVHMLGRSFTCR	0.455784	1596.73	0.12881	3	53.565	28.655	yes
Q6UN15	ETALPSTK	0.455753	845.449	0.2865	3	71.221	12.629	yes
Q8IWC1	CTSDELRAVMFPMSTMK	0.451005	1945.88	0.28211	4	49.559	26.872	yes
P46821	ETKNAANASASK	0.449743	1190.59	0.086097	2	57.794	19.011	yes
Q96KR1	QAAAAAAAAAATAAWTGTTFTK	0.449116	2022.02	1.3242	4	41.818	15.995	yes
P51610	SPITIITTK	0.446396	972.586	0.061601	3	107.97	62.368	yes
Q5JX69	GAMATGSGSNLKLRR	0.445873	1517.81	1.6097	3	43.761	11.322	yes
Q9C073	RSASWGSTDHR	0.444256	1258.58	1.4596	3	57.267	17.419	yes
P51610	IPPSSAPTVLSVPAGTTIVK	0.443646	1934.11	1.8703	4	59.912	36.592	yes
Q9UHD9	SQNRPQGQSTQPSNAAGTNTTSASTPR	0.441922	2743.29	0.14952	3;4	123.71	16.486	yes
P49790	QQEPVTSTSLVFGK	0.441328	1519.79	0.33345	3	174.59	122.09	yes
P11532	IQSDLTSHEISLEEMKK	0.431294	1986.99	2.464	4	44.252	13.163	yes
Q9Y3E2	TPAQWRENSQLDTSPPCLGGNKK	0.431095	2526.23	0.5731	4	42.639	9.798	yes
Q5T6F2	GVSVSSSTTGLPDMTGSVYNK	0.429569	2085.99	0.10354	3;4	128.51	91.775	yes
Q9UPN3	ATSSETKESTDIEK	0.428858	1524.72	0.97485	3	41.996	11.811	yes
Q96T58	VNTSEGVVLLSYSGQK	0.426171	1679.87	2.994	3	79.467	45.214	yes
Q5JSZ5	GGLPVSQSQEIFSSLQPFR	0.421183	2076.06	0.072397	3	78.272	41.528	yes
P51610	TMAVTPGTTTLPATVK	0.420114	1587.85	0.091329	3;4	85.166	46.989	yes
Q9UKD1	VVSTLPSTVLGK	0.419441	1199.71	0.025926	3	86.539	31.668	yes
Q7LBC6	VEHSPFSSFASQASGSSSSATTVTSK	0.417277	2573.19	0.27985	4	86.095	62.195	yes
Q7Z3K3	STPSTSTTPTATQPTSLGQLAVQSPGQSNQTTNPK	0.413529	3512.72	0.25618	4	62.647	34.432	yes
Q96HC4	ANNSQEPSPQLASSVASTR	0.412665	1942.93	0.21619	2;3;4	147.84	83.772	yes
Q6UVJ0	KQDVLGPSTTPPAHSSSNTIR	0.404588	2192.12	0.074766	4;5	63.823	30.106	yes
Q96Q06	GTVQTSVDTTK	0.401858	1135.57	0.83438	3	86.498	41.886	yes
Q9NZM3	AQSLIDLGSSSSTSSTASLSGNSPK	0.401638	2381.16	0.48285	4	59.219	28.751	yes
P04150	SSASTAVSAAPTEK	0.401216	1305.64	0.62448	3	59.225	26.971	yes
P85037	EPAAAVAATATTTPATATTASASASSTGEPEVK	0.398869	3017.47	0.075331	4	89.751	65.399	yes
Q8TB72	SESGGLGVSMVEYVLSSSPADK	0.396198	2198.04	0.73149	4	76.606	42.185	yes
Q8WX93	TTSVSLTIGSSSPK	0.395734	1363.72	1.2249	2;3	108.36	43.184	yes
Q92841	ESAAPAAAPTAEAPPPSVVTRPEPQALPSPAIR	0.394876	3245.7	0.43735	4	42.922	22.204	yes
Q9UHR5	KGTTTNATSTTTTTASTAVADAQK	0.393171	2327.15	0.11225	4;5	112.35	81.491	yes
Q9P2N5	MIYSSSNLKTPSK	0.390444	1454.74	0.39883	5	49.595	20.271	yes
Q96L91	TQFLTTPISQAQK	0.388857	1461.78	1.5999	3	64.298	22.46	yes
P40692	STTSLTSSSTSGSSDK	0.378401	1531.68	0.1658	3	95.365	58.188	yes
O00268	QVSQAQTTVQPSATLQR	0.370077	1841.96	0.42599	3	127.07	95.471	yes
P23588	TGSESSQTGTSTTSSR	0.367498	1572.69	0.51401	2;3	201.04	21.068	yes
Q7Z589	IISSNIVSGTTTK	0.366152	1319.73	0.15219	3	89.502	50.733	yes
Q9Y4G6	ALVEDTKLLVSGAASTPDK	0.358445	1914.03	0.64703	2	43.956	12.309	yes
P02511	APSWFDTGLSEMR	0.356805	1495.68	2.983	3	56.29	21.253	yes
Q8IVL1	SSKIASFIPKGGK	0.355955	1318.76	0.073992	2	55.261	16.082	yes
Q7Z478	YSSRTQHAILYMNPHK	0.351608	1944.96	1.4538	4	47.774	11.965	yes
Q9C0D5	MSSSTSSLTSSSSFSDGFK	0.344812	1928.83	0.3525	3	61.111	35.569	yes
P52594	APVGSVVSVPSQSSASSDK	0.34368	1787.89	0.26699	2;4	70.615	29.504	yes
Q8IWZ8	AQTSTDAPTSAPSAPPSTPTPSAGK	0.340718	2324.11	0.0098364	2;4	124.91	41.63	yes
O14543	FPAAGMSRPLDTSLRLK	0.333333	1859.01	0.25241	4	47.088	18.949	yes
Q9NZN5	LEDYQRRLDTSSLK	0.333333	1722.89	0.37808	3	58.246	29.434	yes
Q8IV36	MGSTDSKLNFRK	0.333333	1382.7	0.073992	3	48.467	10.498	yes
P51610	VMTSGTGAPAK	0.333333	1018.51	0.43801	2;3	101.38	63.822	yes
Q96EV2	ELPIAPSHVIEMSSSR	0.333279	1751.89	0.17897	4	53.768	28.866	yes
Q9BWX5	TIAKARGSSGSTR	0.327593	1290.7	0.15395	3	71.531	22.923	yes
Q02086	SSTTTTPVQSGANVVK	0.320348	1575.81	0.25673	3	48.376	11.334	yes
Q8WXI9	SISQSISGQK	0.31922	1033.54	2.2677	3	96.866	43.654	yes
A0A087WXM9	TNSSTPGKKNR	0.317647	1188.62	1.6222	3	55.899	11.587	yes
Q9UPN6	SSEPVKETVQTTQSPTPVEK	0.314841	2171.1	0.89313	4	43.091	11.208	yes
Q5VT52	SFNYSPNSSTSEVSSTSASK	0.304555	2065.91	0.10731	3	77.062	47.985	yes
P23588	SQSSDTEQQSPTSGGGK	0.293815	1679.72	0.40446	2;4	58.796	27.509	yes
Q9H1B7	FEYPPPPVSLGSSSHTAR	0.272625	1927.94	0.12071	4	53.304	22.017	yes
Q5T5U3	SASQGALTSPSVSFSNHR	0.263806	1831.88	0.072331	4	95.666	57.249	yes
Q7KZ85	DHYQDPVPGITPSSSSR	0.246379	1841.85	0.27985	3	59.792	38.017	yes
P04792	LATQSNEITIPVTFESR	0.237828	1904.98	0.4612	3	59.339	18.843	yes
Q9NXV6	TSSEASVSSSVAK	0.235113	1238.6	1.6873	3	92.427	55.489	yes
P35658	SPGSTPTTPTSSQAPQK	0.229232	1670.81	1.2123	2;3	66.738	27.566	yes
P49790	GFDTSSSSSNSAASSSFK	0.22781	1752.74	0.33345	3	159.1	129.34	yes
Q99700	STSHTSDFNPNSGSDQR	0.227691	1835.77	0.27929	4	95.624	64.469	yes
P46013	TSDTETEPSK	0.222942	1093.48	0.12021	3	76.357	41.459	yes
O43166	ENSTFSINDAASHTSTMSSR	0.215616	2141.93	0.064451	4	68.192	30.579	yes
P35658	SSATVTGEPPSYSSGSDSSK	0.199299	1929.84	0.40663	3	91.378	53.598	yes
Q96BD5	FTPTTLPTSQNSIHPVR	0.18852	1894.99	0.060037	4	47.089	16.522	yes
P51003	EQLDTETSTTQSETIQTAASLLASQK	0.139031	2780.36	0.25357	4	44.708	15.631	yes

## Sheet: Test 1
O-GlcNAc Proteins	O-GlcNAc Peptides	Localization prob	Mass	|Mass error [ppm]|	Charges	Score	Delta score	DFIs
P31327	AFAMTNQILVEK	1	1363.72	1.2691	2;4	120.57	10.273	yes
Q9UNF1	ALMASMAR	1	849.42	4.734	2	55.531	21.609	yes
Q9NR12	AQPVQSKPQK	1	1109.62	0.055336	3;4	85.522	42.724	yes
Q86VX9	ATDMQRKR	1	1004.52	0.29644	3	57.281	9.4324	yes
P53671	ATGKVMVMKELIR	1	1474.84	0.43801	3	64.04	13.952	yes
P40939	CLAPMMSEVIRILQEGVDPK	1	2228.14	0.1658	4	43.208	9.6195	yes
P60981	CSTPEEIKKR	1	1189.61	1.0731	3	45.28	12.585	yes
Q9BTT6	DEEDNETRTLLRR	1	1645.8	0.41917	3	40.493	10.89	yes
Q9UK32	DRNETMNMILKAK	1	1562.79	1.7785	3	74.853	20.367	yes
Q9P286	DSLPPRVKDLHK	1	1403.79	0.16513	3	55.314	21.725	yes
P28289	EDLVPYTGEKRGK	1	1490.77	0.38619	3	47.537	10.9	yes
Q5SSQ6	EEMAQRGCTKGPR	1	1461.68	0.42076	3	55.261	18.117	yes
Q8IWJ2	EVQSLKEQHQK	1	1352.7	0.32501	4	58.699	16.456	yes
Q13501	GLHRGHTK	1	904.499	3.1297	2	48.561	16.527	yes
O60260	GQEMNATGGDDPR	1	1346.55	0.047213	2	44.312	23.363	yes
Q8NI35	IDTLKNDNIQALEK	1	1613.86	0.16564	3	42.785	10.039	yes
Q9Y6R6	KAFTLLTKLVR	1	1288.82	0.13997	3	40.727	14.653	yes
Q06455	KAHDMITTER	1	1200.59	1.2097	3	41.242	12.256	yes
Q9BZ95	KFPTAIFESK	1	1166.63	0.12983	4	40.941	16.024	yes
A8MWD9	KFSLKLNGGR	1	1118.66	0.58407	2	61.56	21.208	yes
O14497	KQAPLTYEK	1	1076.59	0.85544	3	53.775	16.226	yes
Q8N4L4	KQTQPPK	1	825.471	3.5046	2	55.531	10.251	yes
Q5VWX1	KYLDVISNKNIK	1	1433.82	2.9525	2	49.632	25.406	yes
Q52WX2	LADFGMTR	1	909.438	0.62563	2	50.703	10.435	yes
Q13670	LGLDWCLITMGK	1	1348.69	1.8913	2	45.653	14.697	yes
Q8NDH6	LKMDVCQKVDLLGASR	1	1774.94	0.91488	3	42.679	18.595	yes
P49802	LMKSDSYPR	1	1095.54	1.6155	4	49.418	13.793	yes
O75394	MFLSAVFFAK	1	1159.61	0.44181	2	56.258	19.078	yes
P78527	MKMIDSARK	1	1078.56	0.56938	2	42.19	9.8611	yes
Q6NYC1	MKYYIEYMESTR	1	1612.73	1.3941	3	40.616	11.804	yes
Q8NEZ4	MQNSAPRKQR	1	1214.63	0.31651	4	58.132	23.746	yes
Q9NRR8	MSEFWHK	1	963.427	0.055336	2	44.349	17.965	yes
P51606	MSKGLPAR	1	858.475	2.8681	3	42.336	14.564	yes
Q9BQ52	MWALCSLLR	1	1091.56	0.078699	3	58.981	17.901	yes
Q8TDB4	MYLRRAVSK	1	1122.63	0.23375	2;3	45.653	16.582	yes
P36776	NYLDWLTSIPWGK	1	1591.8	1.3913	4	42.031	8.8889	yes
Q9Y618	QEINKKLNTHNR	1	1493.81	0.79491	2	49.081	25.369	yes
Q5VTJ3	QNLEALKEAAYKVMSENYLQVLR	1	2709.42	0.97906	4	40.384	12.085	yes
Q8WZ42	QPIETERSK	1	1086.57	2.3972	4	53.775	9.8289	yes
O60502	QVAHSGAK	1	796.419	0.24209	3;4	87.713	51.289	yes
P42568	SAFKEPSR	1	920.472	1.6623	3	44.614	11.351	yes
Q15036	SGGSIRKMLR	1	1103.62	0.94065	3	47.187	17.214	yes
Q66GS9	SIAFRRQR	1	1032.59	0.22051	2	52.716	8.9083	yes
Q86UT8	SMVKGLDSYEEKEDK	1	1756.82	2.3177	4	43.761	10.214	yes
Q8N815	SVSYQAVEILERFMVKQAENICR	1	2712.37	2.8436	5	42.639	22.343	yes
Q96E11	TNSMNKLKK	1	1062.59	2.2062	4	56.205	22.516	yes
Q9NQV7	VNPGNTGKLFVGVGISR	1	1713.95	3.8441	4	44.312	11.854	yes
Q6ZU69	VPGEKESEK	1	1001.5	0.017536	2	82.426	29.7	yes
Q99848	VQTEVLQKRQQEK	1	1612.89	0.27985	3	46.88	8.434	yes
Q96B01	WVPPAASGGSR	1	1083.55	0.78321	3	50.034	12.969	yes
Q9Y4W6	ASIFKVHLRPLK	1	1407.87	1.7232	2	55.724	22.459	yes
Q9UKU6	DKWKILNTR	1	1172.67	2.1015	3	67.385	26.909	yes
O95757	LNQTLKK	1	843.518	1.2034	2	78.77	14.013	yes
Q30201	MGPRARPALLLLMLLQTAVLQGR	1	2517.48	5.4377	3	51.566	25.58	yes
Q9NZL9	MLDPSIK	1	802.426	0.83825	3	51.346	17.47	yes
Q15032	NLKPAVTK	1	869.533	3.8156	4	44.639	9.4612	yes
Q14C86	NLMAQLQETMR	1	1333.65	3.7261	3	63.624	17.214	yes
Q6NUK1	SDKMNIFGGFR	1	1270.61	0.5975	5	42.336	12.592	yes
Q15326	SEMEEEKR	1	1036.45	1.0826	3	63.216	21.34	yes
Q99490	SRGAGALQR	1	914.505	5.498	2	74.464	11.046	yes
Q9Y3U8	VTKNVSKPR	1	1027.61	0.57162	3;4	64.224	29.574	yes
O75691	LFSVIKNKLSR	0.999994	1303.8	1.2806	2	69.721	22.759	yes
Q9ULL0	SKFQPQMSSK	0.999986	1166.58	5.6298	3	72.2	32.576	yes
A8MPX8	GPLLFSTSEPNLTK	0.999985	1502.8	1.1795	3	68.463	19.397	yes
Q9Y2U8	NSPPNSLTPCLK	0.999963	1269.64	0.10554	3	46.796	20.978	yes
P21980	ISTKSVGR	0.999956	846.492	0.23375	3	72.2	20.475	yes
Q9Y6U3	NGTSKKGGQAPAPPTR	0.99995	1565.83	0.65773	2	53.3	16.143	yes
Q9Y2Y4	RFSLKHQMETHYR	0.999943	1731.86	1.7546	3	61.48	25.049	yes
Q01167	TPLGPLSSR	0.999933	926.519	0.25673	3	66.27	33.568	yes
Q99835	SNHPGLLSEKAASK	0.999928	1437.76	0.70561	4	47.726	10.684	yes
Q10570	TPCRGATEGLSKK	0.999915	1346.7	0.45091	2	54.343	16.006	yes
Q9H5L6	HHSERTDMK	0.999891	1139.51	0.055336	2	72.607	23.264	yes
Q9Y4W6	KDDSHWWSR	0.999878	1215.54	1.7232	2	62.463	21.221	yes
Q9NR48	KLMSCPLAGLISK	0.999867	1359.76	2.1801	3	59.116	26.117	yes
Q9BX69	DSILSHKVLDEDSK	0.999863	1584.8	0.69848	4	54.343	18.216	yes
P58876	MPEPTKSAPAPK	0.999842	1252.65	0.65034	3	52.247	9.5393	yes
Q9NQL9	ISIPDDGCPFVSK	0.999815	1376.66	0.055336	3	58.172	22.515	yes
Q96RT1	TMNRLTQLER	0.999751	1260.66	3.568	3	55.721	13.725	yes
Q86X51	ITLVASALRRR	0.999628	1254.79	0.66905	2	59.418	14.334	yes
Q86T96	QSFQKSNSAKWPLPSCR	0.999374	1962.97	1.2	3	71.98	27.355	yes
Q9HC44	LTRRTTDR	0.999259	1017.57	0.015679	3	60.478	29.994	yes
Q8WWL7	ESFSQEPSALQKK	0.999117	1477.74	1.7184	3	54.65	20.476	yes
P07196	SRFTVLTESAAK	0.998921	1308.7	0.0069274	4	61.265	24.972	yes
Q14140	MDLTELDHIMEVLVGS	0.998779	1800.86	4.632	4	41.577	13.925	yes
O00410	ENVNATENCISAVGKIMK	0.998637	1919.94	1.8554	3	55.011	22.757	yes
Q9UKI9	MSGDVADSTDAR	0.9986	1223.51	0.95721	3	61.344	32.386	yes
Q8NDZ0	QFFHLSLPSSWDDRR	0.998345	1889.92	0.094872	4	50.897	21.621	yes
Q6IE81	MEPITKVSHIPSSR	0.998119	1580.83	3.1655	3	51.463	10.988	yes
P27816	ASPSKPASAPASR	0.998087	1225.64	0.24998	3;4	123.76	69.482	yes
Q9GZN7	MATVMAATAAER	0.99804	1221.58	2.6039	3	52.391	17.695	yes
Q5TIA1	NIEGSSGNTSLPLVLKKLLLSR	0.998033	2338.36	0.031642	3	49.066	27.218	yes
Q6P6B7	ATSTHLTALHYAAK	0.99802	1483.78	0.5975	3;4	70.089	10.784	yes
Q8IVE0	MRGRYEASQDLLGTLR	0.996312	1864.96	0.16766	3	58.32	11.91	yes
Q9HBL8	LVVVFGGTGAQGGSVAR	0.995278	1573.86	0.42808	3	49.216	11.218	yes
P62995	SGSAHGSGKSAR	0.995197	1100.53	0.65458	2	54.898	18.58	yes
Q92625	SQQIAALIEDHMTGK	0.994431	1640.82	0.63688	4	46.797	10.505	yes
Q9UBT6	DKPIAVGSMSMLSTSNYHARR	0.994161	2320.14	0.059877	3	53.504	8.9649	yes
P35658	SHLVHGSSPGVMGTSVATSASK	0.994009	2096.03	0.26788	2;3;4	181.61	103.3	yes
P02545	SVGGSGGGSFGDNLVTR	0.993875	1565.74	4.466	3	67.928	11.359	yes
Q86T24	RSYVCLTSLR	0.993811	1196.63	0.58892	3	44.132	16.701	yes
Q15048	ELSMGSSLLSGR	0.993231	1235.62	1.0786	2	55.721	37.389	yes
Q8TBB5	STGGPSGR	0.993018	717.341	1.8257	3	47.574	17.007	yes
Q86T82	LMLTLQDNSFLSIDK	0.992131	1736.9	5.0145	4	40.941	10.366	yes
Q14814	SPPPPTHSTQLGAPSR	0.990925	1628.83	0.14088	4	65.956	65.956	yes
Q9H410	MTSVTRSEIIDEK	0.990227	1507.76	0.30581	3	59.975	28.301	yes
P0CF97	SADKLKTIPNDNTVSLR	0.989835	1871.01	0.063291	3	49.595	15.2	yes
Q14919	KNGGMGTKSK	0.9891	1006.52	2.5425	2	68.557	23.694	yes
O43491	KDSSQLGTDATK	0.988891	1249.62	5.2638	3	57.225	18.046	yes
P51610	TAAAQVGTSVSSATNTSTRPIITVHK	0.987715	2597.38	0.99082	4;6	77.43	45.513	yes
Q8TC07	KDPYTATMIGFSK	0.986989	1457.72	2.444	2	48.729	17.007	yes
O94886	SGENQIMMTK	0.986123	1137.52	2.2174	2	56.087	22.814	yes
Q08495	SPGIISQASAPR	0.984776	1182.64	0.56718	4	58.817	8.7767	yes
A5YKK6	TVTVTRPTGVSFKK	0.981479	1519.87	1.5244	2	51.726	14.477	yes
Q9UKT5	TFWQSVSKER	0.978986	1266.64	1.3913	3	78.287	26.268	yes
Q6PDB4	IYSSVKSHILNKYR	0.978402	1706.95	0.14017	4	67.519	31.312	yes
Q9P270	FRSPAAPSPLALRQPVK	0.978171	1834.06	0.9405	4	45.54	18.799	yes
Q96PE3	GPSFKASSLK	0.976646	1020.56	5.878	2	58.699	23.157	yes
Q0IIN9	TSRGALSPSLGR	0.975978	1200.66	2.8766	4	43.68	10.682	yes
P51610	HSHAVSTAAMTR	0.974725	1267.61	1.8703	2;3;4	95.554	63.402	yes
P49790	SSSAGFSFGTGVINSTPAPANTIVTSENK	0.971279	2840.38	0.64788	4;5	137.58	117.88	yes
Q8TBY0	CIDGASIEVTLAKPVNKENTWR	0.971083	2443.25	0.73149	4	49.924	22.661	yes
Q9H089	KVSVSATPGHTK	0.97077	1210.67	1.1376	4	45.661	17.747	yes
Q7Z460	LCEIFTRMFADPHSK	0.970625	1793.86	0.11153	4	66.022	17.745	yes
Q86XT4	LGVIKGTASR	0.967626	1000.6	0.66905	2	67.334	32.463	yes
O75376	SAAVSEQQQLEQK	0.965707	1444.72	0.35901	3	161.26	161.26	yes
P40818	ELYTMMTDK	0.963484	1130.5	0.32408	3	47.302	10.729	yes
Q9H0E7	RFSSKPVVLTEAQK	0.962152	1588.89	1.136	3	43.594	11.98	yes
Q96KR1	AGYSQGATQYTQAQQTR	0.96079	1857.86	0.58263	2;3;4;5	175.7	142.96	yes
O15457	GLEYIEQLCIAEFSTVLMEVQSK	0.951082	2629.3	2.3771	4	42.639	13.809	yes
P56192	DALRSILTISR	0.947863	1243.72	0.51265	3	56.548	9.3052	yes
Q86UR5	ISSFTPKMQGR	0.942471	1250.64	0.30719	3	42.426	14.846	yes
Q03001	TIIQLKPRNSDCPLK	0.94171	1724.96	0.55046	4	56.746	21.875	yes
Q12955	SNINMYSSSLPFK	0.941612	1486.71	0.23653	3	47.039	19.357	yes
Q6N021	SAPSRTKQTENASQAK	0.941578	1702.86	0.5975	3	47.639	10.114	yes
Q9NV35	MTASAQPR	0.940861	860.417	0.28132	2	43.651	18.875	yes
P51610	ISVATGALEAAQGSK	0.939594	1401.75	0.19786	3;4	167.97	113.69	yes
O43889	VYVGGLESRVLKYTAQNMELQNK	0.93725	2639.37	0.55677	4	52.432	20.824	yes
Q99959	NMSSAGADGRKAMR	0.93674	1450.68	2.2066	2	59.345	30.718	yes
A4D256	NEVSSECGKK	0.936622	1079.49	2.3076	2	40.767	9.878	yes
Q8N9L7	TMTMSYKAIEK	0.935773	1301.64	1.4095	2;3	78.513	10.705	yes
Q8N103	HQSFTTKTEKGKPSR	0.933791	1730.91	1.393	4	53.504	24.9	yes
Q9BW19	GTLSGAPAPPTRHDFSFDR	0.914095	2027.98	2.7017	4	44.045	11.791	yes
Q12981	SMSGTIQLGR	0.912191	1048.53	1.4107	2	60.398	15.786	yes
Q9BYW2	TAEADTSSELAKK	0.910691	1349.67	1.7877	3	58.172	13.855	yes
P07814	THVADFAPEVAWVTRSGK	0.909743	1970	1.4591	3	43.696	14.373	yes
Q9Y520	ESVTDYTTPSSSLPNTVATNNTK	0.9074	2426.14	0.45952	2;3;4	139.95	69.487	yes
Q9NYV4	TSAVSSQANSQPPVQVSVK	0.904832	1912.99	0.081794	3;4;5	86.084	53.128	yes
Q6N021	AAAEKLSSLENSSNKNEK	0.902904	1918.96	0.18759	3	55.975	9.6231	yes
Q14315	TERTEISKTR	0.901383	1219.65	2.3103	2	54.066	12.824	yes
Q7Z3J3	EGFSIPVSADGFK	0.889833	1352.66	0.0046228	3	112.24	75.291	yes
Q93052	STGEPLGHVPAR	0.887721	1219.63	0.55457	2;3;4	132.56	76.81	yes
Q9NSC2	GQPSRPTKSK	0.887148	1084.6	0.82682	3	44.968	10.762	yes
Q86YV0	ALSHQEPMVSTQPAPRSIFRR	0.876356	2407.25	0.073992	4	41.513	17.649	yes
Q9UKY1	SQVPAAQPTAETKPATAAVPTSQSVK	0.875372	2564.34	5.6557	4	52.69	22.335	yes
Q13114	HLGDAFKPDPNSSSFK	0.873141	1745.84	0.58892	3;4	60.196	29.953	yes
Q8IVM0	TAKAANSKSK	0.872157	1004.56	0.96285	2	56.205	13.487	yes
O95628	SNPVIPISSSNHSAR	0.86389	1564.8	0.83438	4	86.453	52.903	yes
P35658	ASSTSLTSTQPTK	0.862169	1307.66	0.0061482	3;4	165.89	122.28	yes
Q8N3D4	SGGREANTKR	0.860035	1074.55	2.2029	5	46.063	14.914	yes
Q96FV9	SYKLDDTQASR	0.85698	1282.62	5.8052	3	59.116	8.9218	yes
Q15648	SPSHSSSNRPFTPPTSTGGSK	0.856063	2115	2.1507	5	47.729	20.979	yes
Q01082	HEVSASTQSTPASSR	0.852668	1543.72	0.074766	2;3;4	127.88	90.074	yes
Q9BYZ2	DLNSDIGTDKDPEQWK	0.846571	1859.85	0.52364	4	43.592	15.427	yes
Q5T6F2	GGYAGSSQAPNK	0.838882	1135.53	0.038144	3	62.077	32.31	yes
Q8N3V7	AASPAKPSSLDLVPNLPK	0.837483	1804.01	0.090046	3	57.288	27.045	yes
Q13769	MSSESSK	0.837238	754.317	2.4864	3	50.12	12.474	yes
P30622	KVQAEDEANGLQTTPASR	0.829983	1913.94	0.3237	2;3;4	86.073	50.417	yes
Q09472	MESTETEERSTELK	0.825809	1668.75	0.42599	4	45.28	13.791	yes
Q9UHR5	GTTTNATSTTTTTASTAVADAQK	0.822658	2199.05	0.38417	4	77.917	81.491	yes
Q96HC4	EVVKPVPITSPAVSK	0.818521	1549.91	0.16701	2;3;4	113.23	88.778	yes
P25686	SASADDIKK	0.814223	933.477	0.61919	2	42.864	9.6018	yes
Q99623	KISSPTGSK	0.80407	903.503	0.17846	3	42.864	10.712	yes
O14497	GGTPGSGAAAAAGSKPPPSSSASASSSSSSFAQQR	0.802727	3092.44	1.8554	5	60.95	32.339	yes
Q6P0N0	TPQCQHVSPGMLGSINR	0.79785	1823.88	4.4349	4	61.096	19.696	yes
Q9BVI0	SKGDSDPKPGSPK	0.793698	1298.65	0.32019	3	46.88	8.9114	yes
P52594	SSSADFGTFNTSQSHQTASAVSK	0.793178	2344.06	0.0046228	3;4	137.26	97.964	yes
P05388	AFLADPSAFVAAAPVAAATTAAPAAAAAPAK	0.792531	2751.46	5.1572	3;4	97.295	23.462	yes
O60318	SPTSVGAFPSTSAFGQEAGEIVNSGFGK	0.791261	2728.3	0.24209	4	50.627	17.912	yes
O15047	GSTPYSQDSAYSSSTTSTSFKPR	0.790173	2441.1	0.025542	4	109.71	75.28	yes
Q8N8S7	GSTIETEQKEDKGEDSEPVTSK	0.786443	2393.11	0.1109	4;5	84.312	55.369	yes
Q14232	RFSVYVTESQPDLSGK	0.772609	1811.91	1.8314	4	42.639	11.551	yes
Q99700	RMSSEGPPRMSPK	0.771772	1458.71	2.0024	3	47.062	9.8818	yes
Q6ZRS2	AETQGANHTPVISAHQTR	0.768206	1916.95	0.041895	4;5	78.419	42.448	yes
Q7Z417	TIQNSSVSPTSSSSSSSSTGETQTQSSSR	0.76299	2891.29	1.3664	4	84.509	63.903	yes
Q7Z739	IGGDLTAAVTK	0.762883	1044.58	0.6967	3	77.633	31.57	yes
P17544	SAAEAVATSVLTQMASQR	0.757409	1819.91	0.81205	3;4	119.43	83.667	yes
O75376	SSSGYPPNQGAFSTEQSR	0.750683	1898.84	0.14088	3	61.477	34.215	yes
Q6ZWC4	LGYSSDVLSARPTMSPTEMLR	0.749969	2310.13	2.1241	3	46.337	18.656	yes
Q9NX95	SSLADKDK	0.749413	862.44	0.52369	3	66.351	14.823	yes
Q96T21	TPHNPLDSSAPLMKK	0.74612	1634.85	1.7776	3	48.532	8.7859	yes
Q4VXU2	EFSPYGVITSAK	0.745201	1297.66	0.11941	4	53.377	12.151	yes
O15090	GSGSDQESQSVSR	0.744813	1322.57	0.39929	3	77.192	45.595	yes
Q8N3X1	ATEISTAVVQR	0.740388	1173.64	0.090046	3	98	54.581	yes
Q8N392	TGTTRIGDLAPQDMKK	0.737473	1730.9	0.86345	3	47.774	8.7962	yes
Q7Z3T8	STIPVQQGLPTSK	0.735947	1354.75	0.70838	3	74.726	41.323	yes
Q6P4R8	ASSASAPSSTPTGTTVVK	0.722761	1647.83	1.3391	3	89.47	53.019	yes
O75820	TFSVSAHLVQHQR	0.713943	1508.78	0.45795	3	53.3	16.883	yes
Q9H425	RFTYFSSLSPMAR	0.70077	1561.77	1.8698	3	54.812	16.512	yes
Q14157	SPAVATSTAAPPPPSSPLPSK	0.693973	1959.03	0.12021	2;3;4	186.74	112.16	yes
Q14247	NASTFEDVTQVSSAYQK	0.690122	1873.87	0.117	3	117.22	88.937	yes
P48382	TAEVPVSEASGQAPPAK	0.689685	1637.83	0.1862	3;4	74.657	44.131	yes
P12270	GIASTSDPPTANIKPTPVVSTPSK	0.688353	2364.25	0.21904	3;4	85.224	57.552	yes
Q16186	SQSAAVTPSSTTSSTR	0.685772	1566.75	0.04512	2;3	179.55	95.26	yes
Q6P4R8	IQTVPASHLQQGTASGSSK	0.680293	1895.97	4.2683	3;4	78.531	37.878	yes
Q9BYJ9	IGDVSSSAVK	0.677351	961.508	0.13997	2;3	86.803	29.628	yes
P35658	NNPATPSTAMGSSVPYSTAK	0.674979	1979.93	0.076043	2;3;4	139.2	95.694	yes
Q8N9K5	QHSQLTVHQRIHTGEKPYECKECGK	0.668302	2935.42	0.42808	4	42.705	15.856	yes
Q8WWM7	STSTPTSPGPR	0.667369	1086.53	1.6031	3	63.694	35.613	yes
Q4KWH8	CMSVMQSGTQMIK	0.666915	1442.64	0.84522	2	42.242	12.442	yes
Q15750	VYPVSVPYSSAQSTSK	0.665222	1698.85	0.37174	3	95.429	48.908	yes
A8MXT2	ASYPSSPASAVSLTSSDEGAKGQK	0.663248	2324.11	4.7289	3	53.957	53.957	yes
O14727	CCSWSADGARIMVAAKNK	0.662365	1909.9	0.25241	3	45.873	14.379	yes
Q15942	VSSGYVPPPVATPFSSK	0.662316	1718.89	0.31933	4	90.765	62.999	yes
Q86U70	SENPTSQASQ	0.66127	1047.45	1.4417	2	101.38	65.935	yes
Q5VT52	SAVSTSVPTKPTENISK	0.659144	1744.92	0.18601	5	68.406	39.043	yes
P51610	VMSVVQTKPVQTSAVTGQASTGPVTQIIQTK	0.658121	3183.72	4.5204	4	46.15	29.685	yes
Q96L91	SLVPQVSQATGVQLPGK	0.649518	1707.95	2.2785	4	43.463	19.184	yes
Q9BTC0	VLSSLKPAAPSPATAATTAAAASTAASSTASSASK	0.642332	3102.6	0.15395	4;5	63.305	45.9	yes
P49790	IGVSSDSGSINPMSEGFK	0.635471	1810.84	0.048199	3;4	82.761	51.816	yes
Q6ZSR3	MGWRFPSPSPR	0.632075	1316.64	0.017536	3	56.548	13.705	yes
Q9H7H1	LSLGVAETAAVMSLLTRT	0.627335	1832.01	0.63225	4	47.64	22.097	yes
O94842	GLQLGQTSTATIQPSQQAQIVTR	0.618559	2425.29	0.074271	2;3;4	134.8	78.624	yes
O75376	SSHLEVSQASQLLQQQQQQQLR	0.61837	2563.31	0.35901	4	105.52	69.087	yes
Q9UQR0	NPMYIHTSVSQDFSR	0.613517	1780.82	0.30122	3;4	67.644	32.896	yes
P51610	SGTVTVAQQAQVVTTVVGGVTK	0.606573	2129.17	0.49427	3;4	65.495	42.173	yes
P51610	YDIPATAATATSPTPNPVPSVPANPPK	0.60033	2673.36	2.0213	4	59.789	32.346	yes
Q8N7Q3	ASNSSSKLMEHK	0.597985	1317.63	0.69723	3	57.267	12.725	yes
Q9ULH7	VSESPSPVTTNTPAQFASVSPTVPEFLK	0.592115	2916.48	1.3404	4	65.056	39.635	yes
Q9Y2T1	QSKPKPHSAQSTKKAYPLESAR	0.589672	2438.3	2.397	3	41.615	9.8482	yes
O95947	ELWKEFSSVGTEMIITK	0.587569	1997.02	4.466	4	57.366	9.4726	yes
Q13620	MAEESSSSSSSSSPTAATSQQQQLK	0.583416	2543.13	0.30731	3;4	114.92	83.512	yes
Q9NXV6	SSSSTNTSLLTSK	0.583016	1311.65	0.070557	3	129.36	87.82	yes
Q9NYD6	TEQSLAGPKGSPSESEK	0.581951	1730.83	0.14134	4	51.771	15.026	yes
Q96MF7	SSSNSGSTGFISFSGVESALSSLK	0.579426	2335.12	2.52	4	45.363	11.774	yes
P49790	FGVSSSSSGPSQTLTSTGNFK	0.573186	2074.98	#VALUE!	3;4;5	131.26	101.54	yes
Q12830	GQPVSTAVSAPNTVSSTPGQK	0.568977	2012.02	0.025551	2;3;4;5	97.388	64.858	yes
Q14684	TPTSSPASSPLVAK	0.564779	1341.71	0.052658	3	82.774	39.744	yes
Q09666	GPQVSSALNLDTSK	0.563344	1415.73	0.43275	3	151.41	123.25	yes
Q9Y618	GSPVTTREPTPR	0.562983	1296.68	0.61058	4	55.98	21.059	yes
Q13029	MQSMQTPLGKTRAR	0.55828	1603.83	1.1917	3	52.172	16.681	yes
Q5VT52	SLFSPQNTLAAPTGHPPTSGVEK	0.558218	2335.18	0.43925	4	85.881	62.116	yes
O75179	IGSSAPTTTAANTSLMGIK	0.551662	1819.93	0.20987	4	61.141	25.214	yes
P04150	VSASSPSLAVASQSDSK	0.550169	1619.8	0.073992	3;4	114.87	73.759	yes
Q14157	SSVATTSGK	0.548279	836.424	0.42596	3	74.698	43.276	yes
P18846	TTPSATSLPQTVVMTSPVTLTSQTTK	0.540977	2676.39	1.3667	4	62.678	41.756	yes
O95391	SATVVDAVNAAPLSGSK	0.540515	1585.83	2.1124	3	64.705	10.362	yes
Q9Y6R0	SRSAAASGGPRRPER	0.537206	1553.81	1.0932	4	52.365	15.194	yes
Q14004	TENQHVPTTSSSLTDPHAGVK	0.535176	2205.07	0.074951	5	85.737	57.382	yes
P49790	STEANVLPPSSIGFTFSVPVAK	0.533638	2247.18	0.24169	4	45.137	15.91	yes
Q9Y520	AVSEMSTEIGTMISVSSAEYGTNAK	0.5329	2562.18	2.4936	4	74.561	41.764	yes
P02545	ASASGSGAQVGGPISSGSSASSVTVTR	0.532075	2364.15	0.017536	2;3;4	106.33	54.752	yes
Q6MZP7	TITISESGVIGSTLNSTTQTPNK	0.529269	2348.21	0.18759	4	91.964	38.956	yes
Q14157	QAFTPSSTMMEVFLQEK	0.519136	1972.93	0.44211	3;4	109.44	72.451	yes
O60518	CANSKTKK	0.5	878.464	0.10221	2	75.109	38.552	yes
Q15942	GPPASSPAPAPK	0.5	1075.57	0.31933	3	69.258	36.445	yes
Q14BN4	QSITDELKQCK	0.5	1291.64	1.7721	2	57.106	8.5741	yes
Q9BQW3	RAADVAEALYSTPR	0.5	1518.78	0.66905	4	46.063	17.251	yes
Q14814	VITSQAGK	0.5	802.455	0.058716	2	71.153	31.28	yes
Q96ST2	WNVEMESSR	0.5	1136.49	2.0178	2	55.353	22.737	yes
P49796	MMKSFKPTSEEALK	0.499271	1625.82	0.20961	2	46.159	11.939	yes
Q6ZS92	CMNTSIHAHTYAR	0.498996	1503.67	0.84893	3	40.475	14.493	yes
Q8IVL0	LFGAKAGGKSASAPNTEGVK	0.484075	1889	0.073992	3	42.708	14.741	yes
P27540	HSNPTQGATPTWTPTTR	0.47822	1851.89	0.65097	2;4	106.73	54.004	yes
Q6P4R8	SGPSTVSEPAK	0.475955	1058.52	0.2865	3	76.868	38.154	yes
Q8WWI1	TSTTGVATTQSPTPR	0.4727	1503.75	0.097973	3	95.554	68.529	yes
Q9H582	TFMKDSVVGSSK	0.472114	1284.64	2.482	2	44.132	10.516	yes
Q96H12	RSVSPLLSTHVLGK	0.470483	1492.87	0.35942	3	44.391	12.507	yes
Q04726	NDAPTPGTSTTPGLR	0.466616	1483.73	0.59773	3	92.679	56.828	yes
Q7Z589	TITVPVSGSPK	0.46456	1084.61	0.87715	2;3	79.089	43.378	yes
P39880	QAPLSQSDITILTPK	0.459616	1610.89	1.1352	3	64.89	13.423	yes
Q9HCX3	SCTVHMLGRSFTCR	0.455784	1596.73	0.12881	3	53.565	28.655	yes
Q8IWC1	CTSDELRAVMFPMSTMK	0.451005	1945.88	0.28211	4	49.559	26.872	yes
P51610	SPITIITTK	0.446396	972.586	0.061601	3	107.97	62.368	yes
Q5JX69	GAMATGSGSNLKLRR	0.445873	1517.81	1.6097	3	43.761	11.322	yes
Q9C073	RSASWGSTDHR	0.444256	1258.58	1.4596	3	57.267	17.419	yes
P51610	IPPSSAPTVLSVPAGTTIVK	0.443646	1934.11	1.8703	4	59.912	36.592	yes
Q9UHD9	SQNRPQGQSTQPSNAAGTNTTSASTPR	0.441922	2743.29	0.14952	3;4	123.71	16.486	yes
P49790	QQEPVTSTSLVFGK	0.441328	1519.79	0.33345	3	174.59	122.09	yes
P11532	IQSDLTSHEISLEEMKK	0.431294	1986.99	2.464	4	44.252	13.163	yes
Q9Y3E2	TPAQWRENSQLDTSPPCLGGNKK	0.431095	2526.23	0.5731	4	42.639	9.798	yes
Q5T6F2	GVSVSSSTTGLPDMTGSVYNK	0.429569	2085.99	0.10354	3;4	128.51	91.775	yes
Q96T58	VNTSEGVVLLSYSGQK	0.426171	1679.87	2.994	3	79.467	45.214	yes
Q5JSZ5	GGLPVSQSQEIFSSLQPFR	0.421183	2076.06	0.072397	3	78.272	41.528	yes
P51610	TMAVTPGTTTLPATVK	0.420114	1587.85	0.091329	3;4	85.166	46.989	yes
Q9UKD1	VVSTLPSTVLGK	0.419441	1199.71	0.025926	3	86.539	31.668	yes
Q7LBC6	VEHSPFSSFASQASGSSSSATTVTSK	0.417277	2573.19	0.27985	4	86.095	62.195	yes
Q7Z3K3	STPSTSTTPTATQPTSLGQLAVQSPGQSNQTTNPK	0.413529	3512.72	0.25618	4	62.647	34.432	yes
Q96HC4	ANNSQEPSPQLASSVASTR	0.412665	1942.93	0.21619	2;3;4	147.84	83.772	yes
Q6UVJ0	KQDVLGPSTTPPAHSSSNTIR	0.404588	2192.12	0.074766	4;5	63.823	30.106	yes
Q96Q06	GTVQTSVDTTK	0.401858	1135.57	0.83438	3	86.498	41.886	yes
P04150	SSASTAVSAAPTEK	0.401216	1305.64	0.62448	3	59.225	26.971	yes
P85037	EPAAAVAATATTTPATATTASASASSTGEPEVK	0.398869	3017.47	0.075331	4	89.751	65.399	yes
Q8TB72	SESGGLGVSMVEYVLSSSPADK	0.396198	2198.04	0.73149	4	76.606	42.185	yes
Q8WX93	TTSVSLTIGSSSPK	0.395734	1363.72	1.2249	2;3	108.36	43.184	yes
Q92841	ESAAPAAAPTAEAPPPSVVTRPEPQALPSPAIR	0.394876	3245.7	0.43735	4	42.922	22.204	yes
Q9UHR5	KGTTTNATSTTTTTASTAVADAQK	0.393171	2327.15	0.11225	4;5	112.35	81.491	yes
Q9P2N5	MIYSSSNLKTPSK	0.390444	1454.74	0.39883	5	49.595	20.271	yes
Q96L91	TQFLTTPISQAQK	0.388857	1461.78	1.5999	3	64.298	22.46	yes
P40692	STTSLTSSSTSGSSDK	0.378401	1531.68	0.1658	3	95.365	58.188	yes
O00268	QVSQAQTTVQPSATLQR	0.370077	1841.96	0.42599	3	127.07	95.471	yes
P23588	TGSESSQTGTSTTSSR	0.367498	1572.69	0.51401	2;3	201.04	21.068	yes
Q7Z589	IISSNIVSGTTTK	0.366152	1319.73	0.15219	3	89.502	50.733	yes
Q7Z478	YSSRTQHAILYMNPHK	0.351608	1944.96	1.4538	4	47.774	11.965	yes
Q9C0D5	MSSSTSSLTSSSSFSDGFK	0.344812	1928.83	0.3525	3	61.111	35.569	yes
P52594	APVGSVVSVPSQSSASSDK	0.34368	1787.89	0.26699	2;4	70.615	29.504	yes
Q8IWZ8	AQTSTDAPTSAPSAPPSTPTPSAGK	0.340718	2324.11	0.0098364	2;4	124.91	41.63	yes
O14543	FPAAGMSRPLDTSLRLK	0.333333	1859.01	0.25241	4	47.088	18.949	yes
Q9NZN5	LEDYQRRLDTSSLK	0.333333	1722.89	0.37808	3	58.246	29.434	yes
Q8IV36	MGSTDSKLNFRK	0.333333	1382.7	0.073992	3	48.467	10.498	yes
P51610	VMTSGTGAPAK	0.333333	1018.51	0.43801	2;3	101.38	63.822	yes
Q96EV2	ELPIAPSHVIEMSSSR	0.333279	1751.89	0.17897	4	53.768	28.866	yes
Q9BWX5	TIAKARGSSGSTR	0.327593	1290.7	0.15395	3	71.531	22.923	yes
Q02086	SSTTTTPVQSGANVVK	0.320348	1575.81	0.25673	3	48.376	11.334	yes
Q8WXI9	SISQSISGQK	0.31922	1033.54	2.2677	3	96.866	43.654	yes
A0A087WXM9	TNSSTPGKKNR	0.317647	1188.62	1.6222	3	55.899	11.587	yes
Q9UPN6	SSEPVKETVQTTQSPTPVEK	0.314841	2171.1	0.89313	4	43.091	11.208	yes
Q5VT52	SFNYSPNSSTSEVSSTSASK	0.304555	2065.91	0.10731	3	77.062	47.985	yes
P23588	SQSSDTEQQSPTSGGGK	0.293815	1679.72	0.40446	2;4	58.796	27.509	yes
Q5T5U3	SASQGALTSPSVSFSNHR	0.263806	1831.88	0.072331	4	95.666	57.249	yes
Q7KZ85	DHYQDPVPGITPSSSSR	0.246379	1841.85	0.27985	3	59.792	38.017	yes
P04792	LATQSNEITIPVTFESR	0.237828	1904.98	0.4612	3	59.339	18.843	yes
Q9NXV6	TSSEASVSSSVAK	0.235113	1238.6	1.6873	3	92.427	55.489	yes
P35658	SPGSTPTTPTSSQAPQK	0.229232	1670.81	1.2123	2;3	66.738	27.566	yes
P49790	GFDTSSSSSNSAASSSFK	0.22781	1752.74	0.33345	3	159.1	129.34	yes
Q99700	STSHTSDFNPNSGSDQR	0.227691	1835.77	0.27929	4	95.624	64.469	yes
P46013	TSDTETEPSK	0.222942	1093.48	0.12021	3	76.357	41.459	yes
O43166	ENSTFSINDAASHTSTMSSR	0.215616	2141.93	0.064451	4	68.192	30.579	yes
P35658	SSATVTGEPPSYSSGSDSSK	0.199299	1929.84	0.40663	3	91.378	53.598	yes
Q96BD5	FTPTTLPTSQNSIHPVR	0.18852	1894.99	0.060037	4	47.089	16.522	yes

## Sheet: Test 2
O-GlcNAc Proteins	O-GlcNAc Peptides	Localization prob	Mass	|Mass error [ppm]|	Charges	Score	Delta score	DFIs
P31327	AFAMTNQILVEK	1	1363.72	1.2691	2;4	120.57	10.273	yes
P46013	AMLTPKPAGGDEK	1	1313.66	0.8343	2	64.64	24.894	yes
Q9NR12	AQPVQSKPQK	1	1109.62	0.055336	3;4	85.522	42.724	yes
Q86VX9	ATDMQRKR	1	1004.52	0.29644	3	57.281	9.4324	yes
P40939	CLAPMMSEVIRILQEGVDPK	1	2228.14	0.1658	4	43.208	9.6195	yes
P60981	CSTPEEIKKR	1	1189.61	1.0731	3	45.28	12.585	yes
Q9UK32	DRNETMNMILKAK	1	1562.79	1.7785	3	74.853	20.367	yes
Q9P286	DSLPPRVKDLHK	1	1403.79	0.16513	3	55.314	21.725	yes
Q8IWJ2	EVQSLKEQHQK	1	1352.7	0.32501	4	58.699	16.456	yes
P52824	FTSRLHNKGVYVR	1	1575.86	0.51265	3	45.438	13.072	yes
Q13501	GLHRGHTK	1	904.499	3.1297	2	48.561	16.527	yes
Q8TEU7	GSMVLPPCSFGK	1	1221.59	1.0091	3	51.771	13.181	yes
Q9Y6R6	KAFTLLTKLVR	1	1288.82	0.13997	3	40.727	14.653	yes
Q06455	KAHDMITTER	1	1200.59	1.2097	3	41.242	12.256	yes
P26599	KENALVQMADGNQAQLAMSHLNGHK	1	2704.32	0.35507	3	44.848	16.739	yes
Q9BZ95	KFPTAIFESK	1	1166.63	0.12983	4	40.941	16.024	yes
A8MWD9	KFSLKLNGGR	1	1118.66	0.58407	2	61.56	21.208	yes
Q8TDD2	KFTCLLCSKR	1	1197.64	1.8597	3	52.49	8.9328	yes
O14497	KQAPLTYEK	1	1076.59	0.85544	3	53.775	16.226	yes
Q15256	KSGKPVFIYK	1	1165.69	1.0826	2	56.632	22.546	yes
Q96S94	KVDLTHLEGEVEK	1	1495.79	0.35195	3	58.04	22.986	yes
Q15435	KVMLALPSVR	1	1112.67	4.1826	2	41.242	15.62	yes
Q5VWX1	KYLDVISNKNIK	1	1433.82	2.9525	2	49.632	25.406	yes
Q52WX2	LADFGMTR	1	909.438	0.62563	2	50.703	10.435	yes
Q9UL12	LDEYKRLMSLGK	1	1451.78	0.28161	3	51.252	11.467	yes
Q8NDH6	LKMDVCQKVDLLGASR	1	1774.94	0.91488	3	42.679	18.595	yes
P49802	LMKSDSYPR	1	1095.54	1.6155	4	49.418	13.793	yes
Q9Y5B9	MAVTLDKDAYYR	1	1444.7	0.21046	2	59.265	30.982	yes
Q8NEZ4	MQNSAPRKQR	1	1214.63	0.31651	4	58.132	23.746	yes
P51606	MSKGLPAR	1	858.475	2.8681	3	42.336	14.564	yes
Q9BQ52	MWALCSLLR	1	1091.56	0.078699	3	58.981	17.901	yes
Q8TDB4	MYLRRAVSK	1	1122.63	0.23375	2;3	45.653	16.582	yes
Q14289	NFKLVKCTVQTEIR	1	1677.92	0.117	4	43.794	14.835	yes
P36776	NYLDWLTSIPWGK	1	1591.8	1.3913	4	42.031	8.8889	yes
Q9Y618	QEINKKLNTHNR	1	1493.81	0.79491	2	49.081	25.369	yes
O60502	QVAHSGAK	1	796.419	0.24209	3;4	87.713	51.289	yes
P42568	SAFKEPSR	1	920.472	1.6623	3	44.614	11.351	yes
Q33E94	SALYMHYLDFCEK	1	1618.72	0.41116	3	54.023	10.333	yes
Q15036	SGGSIRKMLR	1	1103.62	0.94065	3	47.187	17.214	yes
Q66GS9	SIAFRRQR	1	1032.59	0.22051	2	52.716	8.9083	yes
Q8N815	SVSYQAVEILERFMVKQAENICR	1	2712.37	2.8436	5	42.639	22.343	yes
Q96E11	TNSMNKLKK	1	1062.59	2.2062	4	56.205	22.516	yes
Q9NQV7	VNPGNTGKLFVGVGISR	1	1713.95	3.8441	4	44.312	11.854	yes
Q6ZU69	VPGEKESEK	1	1001.5	0.017536	2	82.426	29.7	yes
Q99848	VQTEVLQKRQQEK	1	1612.89	0.27985	3	46.88	8.434	yes
Q8NDV3	YSQNELEMIKK	1	1381.69	2.7642	3	47.844	9.849	yes
Q9UKU6	DKWKILNTR	1	1172.67	2.1015	3	67.385	26.909	yes
Q6P3R8	ESKNPEQKYK	1	1249.63	0.5975	5	60.398	28.069	yes
Q30201	MGPRARPALLLLMLLQTAVLQGR	1	2517.48	5.4377	3	51.566	25.58	yes
Q9NZL9	MLDPSIK	1	802.426	0.83825	3	51.346	17.47	yes
Q09666	MPKFNFSKPK	1	1222.65	0.19725	3	53.557	17.14	yes
Q15032	NLKPAVTK	1	869.533	3.8156	4	44.639	9.4612	yes
Q14C86	NLMAQLQETMR	1	1333.65	3.7261	3	63.624	17.214	yes
Q6NUK1	SDKMNIFGGFR	1	1270.61	0.5975	5	42.336	12.592	yes
Q15326	SEMEEEKR	1	1036.45	1.0826	3	63.216	21.34	yes
Q99490	SRGAGALQR	1	914.505	5.498	2	74.464	11.046	yes
Q9Y3U8	VTKNVSKPR	1	1027.61	0.57162	3;4	64.224	29.574	yes
Q9ULL0	SKFQPQMSSK	0.999986	1166.58	5.6298	3	72.2	32.576	yes
A8MPX8	GPLLFSTSEPNLTK	0.999985	1502.8	1.1795	3	68.463	19.397	yes
O00566	DKALKSSQAFFSK	0.999978	1455.77	1.8602	4	55.261	18.81	yes
Q9Y2U8	NSPPNSLTPCLK	0.999963	1269.64	0.10554	3	46.796	20.978	yes
P21980	ISTKSVGR	0.999956	846.492	0.23375	3	72.2	20.475	yes
Q9Y6U3	NGTSKKGGQAPAPPTR	0.99995	1565.83	0.65773	2	53.3	16.143	yes
Q9Y2Y4	RFSLKHQMETHYR	0.999943	1731.86	1.7546	3	61.48	25.049	yes
Q99835	SNHPGLLSEKAASK	0.999928	1437.76	0.70561	4	47.726	10.684	yes
Q8WXI3	SHLEGSLPQALPR	0.999925	1403.75	1.8088	2;3	59.198	16.481	yes
Q9H5L6	HHSERTDMK	0.999891	1139.51	0.055336	2	72.607	23.264	yes
Q9NR48	KLMSCPLAGLISK	0.999867	1359.76	2.1801	3	59.116	26.117	yes
P58876	MPEPTKSAPAPK	0.999842	1252.65	0.65034	3	52.247	9.5393	yes
Q3V6T2	KITNLKITCEK	0.999828	1289.74	0.84522	3	63.624	28.876	yes
Q9NQL9	ISIPDDGCPFVSK	0.999815	1376.66	0.055336	3	58.172	22.515	yes
Q00610	TLQIFNIEMKSKMK	0.999791	1709.92	0.50434	3	56.414	8.64	yes
Q96RT1	TMNRLTQLER	0.999751	1260.66	3.568	3	55.721	13.725	yes
Q66GS9	SPDVLSLESRNK	0.99975	1343.7	0.24266	4	49.988	17.292	yes
Q8N0U4	VPSSLQAHLQLSGK	0.999632	1463.81	0.52364	3	75.088	36.67	yes
Q14966	ETLKNVPFSELNLK	0.99946	1630.89	1.277	3	65.043	21.249	yes
Q9HC44	LTRRTTDR	0.999259	1017.57	0.015679	3	60.478	29.994	yes
P78312	AVTGENNFTDTMR	0.999069	1454.65	2.3473	3	41.242	11.036	yes
P07196	SRFTVLTESAAK	0.998921	1308.7	0.0069274	4	61.265	24.972	yes
Q9H8H0	ESTSCPVVQK	0.998892	1076.52	2.482	3	56.013	15.772	yes
Q5FWF5	SQAKSSSESK	0.99889	1037.5	1.0306	2	64.73	11.163	yes
Q14140	MDLTELDHIMEVLVGS	0.998779	1800.86	4.632	4	41.577	13.925	yes
Q9UL36	HSRIHTGERPFHCTLCEK	0.998685	2150.03	1.6071	4	40.857	8.6661	yes
Q8NDZ0	QFFHLSLPSSWDDRR	0.998345	1889.92	0.094872	4	50.897	21.621	yes
P12757	QKCTCDSNLEKDK	0.998334	1510.68	1.714	2	50.354	25.854	yes
P56645	VRTSPLNEDVFATK	0.998328	1575.83	0.1254	3	52.821	10.565	yes
Q6IE81	MEPITKVSHIPSSR	0.998119	1580.83	3.1655	3	51.463	10.988	yes
P27816	ASPSKPASAPASR	0.998087	1225.64	0.24998	3;4	123.76	69.482	yes
Q9GZN7	MATVMAATAAER	0.99804	1221.58	2.6039	3	52.391	17.695	yes
Q6P6B7	ATSTHLTALHYAAK	0.99802	1483.78	0.5975	3;4	70.089	10.784	yes
Q969U7	SIFIKYKSKPFCEK	0.997779	1716.93	0.78321	2	51.359	20.707	yes
Q9H379	PLASPIQHHEVTR	0.996868	1483.79	0.14193	2	45.28	10.512	yes
Q9HBL8	LVVVFGGTGAQGGSVAR	0.995278	1573.86	0.42808	3	49.216	11.218	yes
Q8IXZ2	ASFPSSALPPR	0.994504	1128.59	0.11257	4	44.425	12.717	yes
Q9UBT6	DKPIAVGSMSMLSTSNYHARR	0.994161	2320.14	0.059877	3	53.504	8.9649	yes
Q9UKT8	HLSNNLETLLKR	0.994134	1436.81	0.17897	3	48.998	12.678	yes
P35658	SHLVHGSSPGVMGTSVATSASK	0.994009	2096.03	0.26788	2;3;4	181.61	103.3	yes
P02545	SVGGSGGGSFGDNLVTR	0.993875	1565.74	4.466	3	67.928	11.359	yes
Q86T24	RSYVCLTSLR	0.993811	1196.63	0.58892	3	44.132	16.701	yes
O75064	SAFNKLASSMGK	0.993666	1239.63	0.74364	3	47.991	12.519	yes
Q5JTH9	APAHHPAAISTAK	0.993438	1270.68	1.3342	3	56.551	21.372	yes
Q15048	ELSMGSSLLSGR	0.993231	1235.62	1.0786	2	55.721	37.389	yes
Q8TBB5	STGGPSGR	0.993018	717.341	1.8257	3	47.574	17.007	yes
Q86T82	LMLTLQDNSFLSIDK	0.992131	1736.9	5.0145	4	40.941	10.366	yes
Q8WZ42	VHIVIDKQSHMLLIEDMTK	0.991592	2249.19	2.102	3	45.618	12.721	yes
Q14814	SPPPPTHSTQLGAPSR	0.990925	1628.83	0.14088	4	65.956	65.956	yes
P0CF97	SADKLKTIPNDNTVSLR	0.989835	1871.01	0.063291	3	49.595	15.2	yes
Q9C0A1	SVLHQTRSRGTK	0.989739	1368.76	1.3272	5	43.897	21.071	yes
O14974	KFPTTATKISPK	0.989672	1317.77	0.25241	4	46.352	16.808	yes
O43491	KDSSQLGTDATK	0.988891	1249.62	5.2638	3	57.225	18.046	yes
P51610	TAAAQVGTSVSSATNTSTRPIITVHK	0.987715	2597.38	0.99082	4;6	77.43	45.513	yes
Q8TC07	KDPYTATMIGFSK	0.986989	1457.72	2.444	2	48.729	17.007	yes
P11532	SLSEVKSEVEMVIK	0.985978	1576.84	3.1294	4	41.912	10.031	yes
Q08495	SPGIISQASAPR	0.984776	1182.64	0.56718	4	58.817	8.7767	yes
P0C7W0	ASGAGGSWGR	0.981116	904.415	0.063291	2	56.551	17.8	yes
Q6ZN04	RIQQQTHTYIVTPSR	0.979006	1826.98	0.38497	3	42.469	17.047	yes
Q6PDB4	IYSSVKSHILNKYR	0.978402	1706.95	0.14017	4	67.519	31.312	yes
Q9P270	FRSPAAPSPLALRQPVK	0.978171	1834.06	0.9405	4	45.54	18.799	yes
Q96PE3	GPSFKASSLK	0.976646	1020.56	5.878	2	58.699	23.157	yes
P51610	HSHAVSTAAMTR	0.974725	1267.61	1.8703	2;3;4	95.554	63.402	yes
P49790	SSSAGFSFGTGVINSTPAPANTIVTSENK	0.971279	2840.38	0.64788	4;5	137.58	117.88	yes
Q8TBY0	CIDGASIEVTLAKPVNKENTWR	0.971083	2443.25	0.73149	4	49.924	22.661	yes
Q9H089	KVSVSATPGHTK	0.97077	1210.67	1.1376	4	45.661	17.747	yes
Q7Z460	LCEIFTRMFADPHSK	0.970625	1793.86	0.11153	4	66.022	17.745	yes
Q13416	NDPEITINVPQSSK	0.96612	1540.77	1.5679	2	50.874	17.957	yes
O75376	SAAVSEQQQLEQK	0.965707	1444.72	0.35901	3	161.26	161.26	yes
P40818	ELYTMMTDK	0.963484	1130.5	0.32408	3	47.302	10.729	yes
Q9H0E7	RFSSKPVVLTEAQK	0.962152	1588.89	1.136	3	43.594	11.98	yes
Q96KR1	AGYSQGATQYTQAQQTR	0.96079	1857.86	0.58263	2;3;4;5	175.7	142.96	yes
O60682	LKTSLPWVPPDTKLSK	0.960223	1809.04	0.054343	4	45.347	21.318	yes
Q9NS91	SKFSPQKEASPAAK	0.960023	1474.78	0.28132	3	53.448	18.698	yes
Q9NYF0	MKPSPAGTAK	0.959092	986.522	0.27314	3	43.604	8.0631	yes
Q86T29	TYGCSDCAKAFFEK	0.956668	1568.66	0.50126	2	44.511	8.2183	yes
Q10713	FETKVTTLDNGLRVASQNK	0.956633	2120.12	0.78768	4	44.998	19.387	yes
Q9P265	MSHSAVNALCR	0.955759	1187.55	0.16513	2	57.106	9.062	yes
O15457	GLEYIEQLCIAEFSTVLMEVQSK	0.951082	2629.3	2.3771	4	42.639	13.809	yes
Q9UBT2	MHIFSMNMKSRFDIK	0.950368	1883.92	0.059877	3	52.52	23.797	yes
Q86UR5	ISSFTPKMQGR	0.942471	1250.64	0.30719	3	42.426	14.846	yes
Q03001	TIIQLKPRNSDCPLK	0.94171	1724.96	0.55046	4	56.746	21.875	yes
Q6N021	SAPSRTKQTENASQAK	0.941578	1702.86	0.5975	3	47.639	10.114	yes
Q9NV35	MTASAQPR	0.940861	860.417	0.28132	2	43.651	18.875	yes
P51610	ISVATGALEAAQGSK	0.939594	1401.75	0.19786	3;4	167.97	113.69	yes
Q14008	SMSGHPEAAQMVRR	0.938572	1555.73	3.0972	3	56.956	25.234	yes
Q8N9L7	TMTMSYKAIEK	0.935773	1301.64	1.4095	2;3	78.513	10.705	yes
Q12955	TKALTTSSCVDVKSR	0.934666	1594.83	0.074953	5	42.785	11.879	yes
Q8N103	HQSFTTKTEKGKPSR	0.933791	1730.91	1.393	4	53.504	24.9	yes
Q12981	SMSGTIQLGR	0.912191	1048.53	1.4107	2	60.398	15.786	yes
Q9BYW2	TAEADTSSELAKK	0.910691	1349.67	1.7877	3	58.172	13.855	yes
O00401	CVTMSSAVVQLYAADR	0.908949	1712.82	1.42	4	56.039	10.671	yes
Q9Y520	ESVTDYTTPSSSLPNTVATNNTK	0.9074	2426.14	0.45952	2;3;4	139.95	69.487	yes
Q9NYV4	TSAVSSQANSQPPVQVSVK	0.904832	1912.99	0.081794	3;4;5	86.084	53.128	yes
Q16543	SMVNTKPEKTEEDSEEVR	0.899172	2106.97	1.9794	4	46.156	13.79	yes
Q7Z3J3	EGFSIPVSADGFK	0.889833	1352.66	0.0046228	3	112.24	75.291	yes
Q93052	STGEPLGHVPAR	0.887721	1219.63	0.55457	2;3;4	132.56	76.81	yes
Q9NSC2	GQPSRPTKSK	0.887148	1084.6	0.82682	3	44.968	10.762	yes
A8CG34	APPTLQAETATKPQATSAPSPAPK	0.884201	2359.24	0.33186	5	55.705	29.658	yes
Q15054	SKLAVTASIHVYSIQKAMLK	0.884077	2187.24	0.67137	3	50.202	12.318	yes
Q86YV0	ALSHQEPMVSTQPAPRSIFRR	0.876356	2407.25	0.073992	4	41.513	17.649	yes
Q9UKY1	SQVPAAQPTAETKPATAAVPTSQSVK	0.875372	2564.34	5.6557	4	52.69	22.335	yes
Q13114	HLGDAFKPDPNSSSFK	0.873141	1745.84	0.58892	3;4	60.196	29.953	yes
Q8IVM0	TAKAANSKSK	0.872157	1004.56	0.96285	2	56.205	13.487	yes
O95628	SNPVIPISSSNHSAR	0.86389	1564.8	0.83438	4	86.453	52.903	yes
P35658	ASSTSLTSTQPTK	0.862169	1307.66	0.0061482	3;4	165.89	122.28	yes
Q8N3D4	SGGREANTKR	0.860035	1074.55	2.2029	5	46.063	14.914	yes
Q15648	SPSHSSSNRPFTPPTSTGGSK	0.856063	2115	2.1507	5	47.729	20.979	yes
Q8IWR0	MSNVSEERRK	0.852884	1234.61	1.2753	2	61.233	30.235	yes
Q01082	HEVSASTQSTPASSR	0.852668	1543.72	0.074766	2;3;4	127.88	90.074	yes
Q9ULU4	FQTSSQK	0.844974	824.403	2.4667	3	50.034	13.289	yes
P07202	AAEIMETSIQAMK	0.844894	1421.69	0.063291	3	47.037	16.474	yes
Q5T6F2	GGYAGSSQAPNK	0.838882	1135.53	0.038144	3	62.077	32.31	yes
Q8N3V7	AASPAKPSSLDLVPNLPK	0.837483	1804.01	0.090046	3	57.288	27.045	yes
Q13769	MSSESSK	0.837238	754.317	2.4864	3	50.12	12.474	yes
P30622	KVQAEDEANGLQTTPASR	0.829983	1913.94	0.3237	2;3;4	86.073	50.417	yes
Q9UHR5	GTTTNATSTTTTTASTAVADAQK	0.822658	2199.05	0.38417	4	77.917	81.491	yes
Q96HC4	EVVKPVPITSPAVSK	0.818521	1549.91	0.16701	2;3;4	113.23	88.778	yes
Q96MY7	SQAMSKSVTLRAK	0.809004	1405.77	2.52	3	43.208	17.226	yes
O14497	GGTPGSGAAAAAGSKPPPSSSASASSSSSSFAQQR	0.802727	3092.44	1.8554	5	60.95	32.339	yes
Q6P0N0	TPQCQHVSPGMLGSINR	0.79785	1823.88	4.4349	4	61.096	19.696	yes
Q8IZD9	KDFEVVDSDQISVSDLYK	0.797623	2086.01	0.38048	4	43.37	13.602	yes
P52594	SSSADFGTFNTSQSHQTASAVSK	0.793178	2344.06	0.0046228	3;4	137.26	97.964	yes
Q9Y2Z2	RQSAMNESSK	0.793107	1136.52	0.53074	3	40.727	10.419	yes
P05388	AFLADPSAFVAAAPVAAATTAAPAAAAAPAK	0.792531	2751.46	5.1572	3;4	97.295	23.462	yes
O60318	SPTSVGAFPSTSAFGQEAGEIVNSGFGK	0.791261	2728.3	0.24209	4	50.627	17.912	yes
O15047	GSTPYSQDSAYSSSTTSTSFKPR	0.790173	2441.1	0.025542	4	109.71	75.28	yes
Q8N8S7	GSTIETEQKEDKGEDSEPVTSK	0.786443	2393.11	0.1109	4;5	84.312	55.369	yes
Q9NPG3	TPASSSSALSHPAKPHSVSSAGSSYK	0.786234	2527.23	0.45983	6	44.474	22.377	yes
Q14232	RFSVYVTESQPDLSGK	0.772609	1811.91	1.8314	4	42.639	11.551	yes
Q6ZRS2	AETQGANHTPVISAHQTR	0.768206	1916.95	0.041895	4;5	78.419	42.448	yes
Q5HYW2	KSSLPPTSPMEK	0.763378	1300.67	0.25483	3	54.772	16.804	yes
A8MXQ7	EAEAERMTLKVQQLTR	0.763263	1902	0.4245	3	49.216	14.365	yes
Q7Z739	IGGDLTAAVTK	0.762883	1044.58	0.6967	3	77.633	31.57	yes
P17544	SAAEAVATSVLTQMASQR	0.757409	1819.91	0.81205	3;4	119.43	83.667	yes
Q5S007	MSYSGRVKTLCLQK	0.75248	1612.84	0.10515	2	45.357	18.326	yes
O75376	SSSGYPPNQGAFSTEQSR	0.750683	1898.84	0.14088	3	61.477	34.215	yes
Q9NX95	SSLADKDK	0.749413	862.44	0.52369	3	66.351	14.823	yes
Q4VXU2	EFSPYGVITSAK	0.745201	1297.66	0.11941	4	53.377	12.151	yes
O15090	GSGSDQESQSVSR	0.744813	1322.57	0.39929	3	77.192	45.595	yes
Q8N3X1	ATEISTAVVQR	0.740388	1173.64	0.090046	3	98	54.581	yes
Q8N392	TGTTRIGDLAPQDMKK	0.737473	1730.9	0.86345	3	47.774	8.7962	yes
Q7Z3T8	STIPVQQGLPTSK	0.735947	1354.75	0.70838	3	74.726	41.323	yes
Q9P2K9	VCMAPPGCLLSSSPDGPTK	0.728999	1858.86	3.0912	4	46.156	22.498	yes
Q5EBN2	ERVELIEKVITMQTR	0.725846	1844.02	2.2745	3	55.724	18.037	yes
Q6P4R8	ASSASAPSSTPTGTTVVK	0.722761	1647.83	1.3391	3	89.47	53.019	yes
Q14157	SPAVATSTAAPPPPSSPLPSK	0.693973	1959.03	0.12021	2;3;4	186.74	112.16	yes
Q14247	NASTFEDVTQVSSAYQK	0.690122	1873.87	0.117	3	117.22	88.937	yes
P48382	TAEVPVSEASGQAPPAK	0.689685	1637.83	0.1862	3;4	74.657	44.131	yes
O15047	QDTPSSFGQFTPQSSQGTPYTSR	0.688544	2503.13	0.064451	4	47.472	15.187	yes
P12270	GIASTSDPPTANIKPTPVVSTPSK	0.688353	2364.25	0.21904	3;4	85.224	57.552	yes
Q16186	SQSAAVTPSSTTSSTR	0.685772	1566.75	0.04512	2;3	179.55	95.26	yes
Q6P4R8	IQTVPASHLQQGTASGSSK	0.680293	1895.97	4.2683	3;4	78.531	37.878	yes
Q9BYJ9	IGDVSSSAVK	0.677351	961.508	0.13997	2;3	86.803	29.628	yes
P35658	NNPATPSTAMGSSVPYSTAK	0.674979	1979.93	0.076043	2;3;4	139.2	95.694	yes
Q8N9K5	QHSQLTVHQRIHTGEKPYECKECGK	0.668302	2935.42	0.42808	4	42.705	15.856	yes
Q8WWM7	STSTPTSPGPR	0.667369	1086.53	1.6031	3	63.694	35.613	yes
Q15750	VYPVSVPYSSAQSTSK	0.665222	1698.85	0.37174	3	95.429	48.908	yes
A8MXT2	ASYPSSPASAVSLTSSDEGAKGQK	0.663248	2324.11	4.7289	3	53.957	53.957	yes
O14727	CCSWSADGARIMVAAKNK	0.662365	1909.9	0.25241	3	45.873	14.379	yes
Q15942	VSSGYVPPPVATPFSSK	0.662316	1718.89	0.31933	4	90.765	62.999	yes
Q86U70	SENPTSQASQ	0.66127	1047.45	1.4417	2	101.38	65.935	yes
Q5VT52	SAVSTSVPTKPTENISK	0.659144	1744.92	0.18601	5	68.406	39.043	yes
P51610	VMSVVQTKPVQTSAVTGQASTGPVTQIIQTK	0.658121	3183.72	4.5204	4	46.15	29.685	yes
Q96L91	SLVPQVSQATGVQLPGK	0.649518	1707.95	2.2785	4	43.463	19.184	yes
Q9BTC0	VLSSLKPAAPSPATAATTAAAASTAASSTASSASK	0.642332	3102.6	0.15395	4;5	63.305	45.9	yes
P45974	MFKALIGKGHPEFSTNR	0.64174	1932	0.62963	4	48.351	18.623	yes
Q6IV72	RFTRPSKLACHTR	0.638911	1571.85	1.3731	3	46.955	21.545	yes
P49790	IGVSSDSGSINPMSEGFK	0.635471	1810.84	0.048199	3;4	82.761	51.816	yes
Q9H7H1	LSLGVAETAAVMSLLTRT	0.627335	1832.01	0.63225	4	47.64	22.097	yes
Q96CD2	SRSDPVLHIDLRR	0.624066	1562.86	1.6609	3	72.29	19.257	yes
Q9HCD5	TQPSSQPLQSGQVLPSATPTPSAPPTSQQELQAK	0.619698	3485.76	1.0691	5	55.964	36.855	yes
O94842	GLQLGQTSTATIQPSQQAQIVTR	0.618559	2425.29	0.074271	2;3;4	134.8	78.624	yes
O75376	SSHLEVSQASQLLQQQQQQQLR	0.61837	2563.31	0.35901	4	105.52	69.087	yes
Q9UQR0	NPMYIHTSVSQDFSR	0.613517	1780.82	0.30122	3;4	67.644	32.896	yes
P51610	SGTVTVAQQAQVVTTVVGGVTK	0.606573	2129.17	0.49427	3;4	65.495	42.173	yes
P46019	MTGRPTLTFPISR	0.598148	1475.79	0.075057	3	47.942	13.974	yes
Q8N7Q3	ASNSSSKLMEHK	0.597985	1317.63	0.69723	3	57.267	12.725	yes
Q02790	KIVSWLEYESSFSNEEAQK	0.59605	2273.09	0.91488	4	50.188	20.049	yes
Q9ULH7	VSESPSPVTTNTPAQFASVSPTVPEFLK	0.592115	2916.48	1.3404	4	65.056	39.635	yes
Q9Y2T1	QSKPKPHSAQSTKKAYPLESAR	0.589672	2438.3	2.397	3	41.615	9.8482	yes
Q13620	MAEESSSSSSSSSPTAATSQQQQLK	0.583416	2543.13	0.30731	3;4	114.92	83.512	yes
Q9NXV6	SSSSTNTSLLTSK	0.583016	1311.65	0.070557	3	129.36	87.82	yes
Q96MF7	SSSNSGSTGFISFSGVESALSSLK	0.579426	2335.12	2.52	4	45.363	11.774	yes
Q9P219	SSPTHDTPSCR	0.578877	1186.5	0.68674	3	56.414	23.711	yes
P49790	FGVSSSSSGPSQTLTSTGNFK	0.573186	2074.98	#VALUE!	3;4;5	131.26	101.54	yes
Q12830	GQPVSTAVSAPNTVSSTPGQK	0.568977	2012.02	0.025551	2;3;4;5	97.388	64.858	yes
Q14684	TPTSSPASSPLVAK	0.564779	1341.71	0.052658	3	82.774	39.744	yes
Q09666	GPQVSSALNLDTSK	0.563344	1415.73	0.43275	3	151.41	123.25	yes
Q9Y618	GSPVTTREPTPR	0.562983	1296.68	0.61058	4	55.98	21.059	yes
Q5T1B0	MSLPKTPSTPLNSTSTSESKK	0.562657	2220.13	0.29053	4	43.326	14.577	yes
Q13029	MQSMQTPLGKTRAR	0.55828	1603.83	1.1917	3	52.172	16.681	yes
Q5VT52	SLFSPQNTLAAPTGHPPTSGVEK	0.558218	2335.18	0.43925	4	85.881	62.116	yes
Q12830	VMVAPISGSVTTGTK	0.557889	1446.78	0.34765	3	88.637	43.279	yes
O75179	IGSSAPTTTAANTSLMGIK	0.551662	1819.93	0.20987	4	61.141	25.214	yes
P04150	VSASSPSLAVASQSDSK	0.550169	1619.8	0.073992	3;4	114.87	73.759	yes
Q14157	SSVATTSGK	0.548279	836.424	0.42596	3	74.698	43.276	yes
P18846	TTPSATSLPQTVVMTSPVTLTSQTTK	0.540977	2676.39	1.3667	4	62.678	41.756	yes
O95391	SATVVDAVNAAPLSGSK	0.540515	1585.83	2.1124	3	64.705	10.362	yes
Q9Y6R0	SRSAAASGGPRRPER	0.537206	1553.81	1.0932	4	52.365	15.194	yes
Q14004	TENQHVPTTSSSLTDPHAGVK	0.535176	2205.07	0.074951	5	85.737	57.382	yes
P49790	STEANVLPPSSIGFTFSVPVAK	0.533638	2247.18	0.24169	4	45.137	15.91	yes
P02545	ASASGSGAQVGGPISSGSSASSVTVTR	0.532075	2364.15	0.017536	2;3;4	106.33	54.752	yes
Q6MZP7	TITISESGVIGSTLNSTTQTPNK	0.529269	2348.21	0.18759	4	91.964	38.956	yes
Q14157	QAFTPSSTMMEVFLQEK	0.519136	1972.93	0.44211	3;4	109.44	72.451	yes
O60518	CANSKTKK	0.5	878.464	0.10221	2	75.109	38.552	yes
Q96LZ7	EAQKEMQKIMTSLK	0.5	1663.86	1.5999	3	46.873	8.497	yes
Q15942	GPPASSPAPAPK	0.5	1075.57	0.31933	3	69.258	36.445	yes
P45974	TMTELEIDMNQR	0.5	1479.67	0.29706	3	43.68	16.007	yes
P20929	TTELPQQR	0.5	971.504	1.3667	2	57.177	11.049	yes
Q14814	VITSQAGK	0.5	802.455	0.058716	2	71.153	31.28	yes
Q96ST2	WNVEMESSR	0.5	1136.49	2.0178	2	55.353	22.737	yes
Q562F6	KVNKMTSK	0.5	934.527	1.7494	2	69.198	21.282	yes
P49750	TSMFKTFK	0.499827	988.505	1.0239	2	67.169	14.767	yes
Q6ZS92	CMNTSIHAHTYAR	0.498996	1503.67	0.84893	3	40.475	14.493	yes
Q9ULG1	STAGSAAAMAGAK	0.496581	1092.52	1.6071	3	56.551	12.9	yes
Q8IVL0	LFGAKAGGKSASAPNTEGVK	0.484075	1889	0.073992	3	42.708	14.741	yes
P27540	HSNPTQGATPTWTPTTR	0.47822	1851.89	0.65097	2;4	106.73	54.004	yes
Q6P4R8	SGPSTVSEPAK	0.475955	1058.52	0.2865	3	76.868	38.154	yes
Q8IV63	KVKWSSTVTSPR	0.473994	1374.76	0.96298	3	54.898	12.687	yes
Q8WWI1	TSTTGVATTQSPTPR	0.4727	1503.75	0.097973	3	95.554	68.529	yes
Q04726	NDAPTPGTSTTPGLR	0.466616	1483.73	0.59773	3	92.679	56.828	yes
Q7Z589	TITVPVSGSPK	0.46456	1084.61	0.87715	2;3	79.089	43.378	yes
Q08AH1	TLDPMVIFFTSGTTGFPK	0.463946	1957.99	0.37385	3	51.524	18.822	yes
P39880	QAPLSQSDITILTPK	0.459616	1610.89	1.1352	3	64.89	13.423	yes
Q9HCX3	SCTVHMLGRSFTCR	0.455784	1596.73	0.12881	3	53.565	28.655	yes
Q6UN15	ETALPSTK	0.455753	845.449	0.2865	3	71.221	12.629	yes
Q96KR1	QAAAAAAAAAATAAWTGTTFTK	0.449116	2022.02	1.3242	4	41.818	15.995	yes
P51610	SPITIITTK	0.446396	972.586	0.061601	3	107.97	62.368	yes
Q9C073	RSASWGSTDHR	0.444256	1258.58	1.4596	3	57.267	17.419	yes
P51610	IPPSSAPTVLSVPAGTTIVK	0.443646	1934.11	1.8703	4	59.912	36.592	yes
Q9UHD9	SQNRPQGQSTQPSNAAGTNTTSASTPR	0.441922	2743.29	0.14952	3;4	123.71	16.486	yes
P49790	QQEPVTSTSLVFGK	0.441328	1519.79	0.33345	3	174.59	122.09	yes
Q9Y3E2	TPAQWRENSQLDTSPPCLGGNKK	0.431095	2526.23	0.5731	4	42.639	9.798	yes
Q5T6F2	GVSVSSSTTGLPDMTGSVYNK	0.429569	2085.99	0.10354	3;4	128.51	91.775	yes
Q96T58	VNTSEGVVLLSYSGQK	0.426171	1679.87	2.994	3	79.467	45.214	yes
Q5JSZ5	GGLPVSQSQEIFSSLQPFR	0.421183	2076.06	0.072397	3	78.272	41.528	yes
P51610	TMAVTPGTTTLPATVK	0.420114	1587.85	0.091329	3;4	85.166	46.989	yes
Q9UKD1	VVSTLPSTVLGK	0.419441	1199.71	0.025926	3	86.539	31.668	yes
Q7LBC6	VEHSPFSSFASQASGSSSSATTVTSK	0.417277	2573.19	0.27985	4	86.095	62.195	yes
Q7Z3K3	STPSTSTTPTATQPTSLGQLAVQSPGQSNQTTNPK	0.413529	3512.72	0.25618	4	62.647	34.432	yes
Q96HC4	ANNSQEPSPQLASSVASTR	0.412665	1942.93	0.21619	2;3;4	147.84	83.772	yes
Q6UVJ0	KQDVLGPSTTPPAHSSSNTIR	0.404588	2192.12	0.074766	4;5	63.823	30.106	yes
Q96Q06	GTVQTSVDTTK	0.401858	1135.57	0.83438	3	86.498	41.886	yes
Q9NZM3	AQSLIDLGSSSSTSSTASLSGNSPK	0.401638	2381.16	0.48285	4	59.219	28.751	yes
P04150	SSASTAVSAAPTEK	0.401216	1305.64	0.62448	3	59.225	26.971	yes
P85037	EPAAAVAATATTTPATATTASASASSTGEPEVK	0.398869	3017.47	0.075331	4	89.751	65.399	yes
Q8TB72	SESGGLGVSMVEYVLSSSPADK	0.396198	2198.04	0.73149	4	76.606	42.185	yes
Q8WX93	TTSVSLTIGSSSPK	0.395734	1363.72	1.2249	2;3	108.36	43.184	yes
Q9UHR5	KGTTTNATSTTTTTASTAVADAQK	0.393171	2327.15	0.11225	4;5	112.35	81.491	yes
Q96L91	TQFLTTPISQAQK	0.388857	1461.78	1.5999	3	64.298	22.46	yes
P40692	STTSLTSSSTSGSSDK	0.378401	1531.68	0.1658	3	95.365	58.188	yes
O00268	QVSQAQTTVQPSATLQR	0.370077	1841.96	0.42599	3	127.07	95.471	yes
P23588	TGSESSQTGTSTTSSR	0.367498	1572.69	0.51401	2;3	201.04	21.068	yes
Q7Z589	IISSNIVSGTTTK	0.366152	1319.73	0.15219	3	89.502	50.733	yes
Q9Y4G6	ALVEDTKLLVSGAASTPDK	0.358445	1914.03	0.64703	2	43.956	12.309	yes
P02511	APSWFDTGLSEMR	0.356805	1495.68	2.983	3	56.29	21.253	yes
Q7Z478	YSSRTQHAILYMNPHK	0.351608	1944.96	1.4538	4	47.774	11.965	yes
Q9C0D5	MSSSTSSLTSSSSFSDGFK	0.344812	1928.83	0.3525	3	61.111	35.569	yes
P52594	APVGSVVSVPSQSSASSDK	0.34368	1787.89	0.26699	2;4	70.615	29.504	yes
Q8IWZ8	AQTSTDAPTSAPSAPPSTPTPSAGK	0.340718	2324.11	0.0098364	2;4	124.91	41.63	yes
O14543	FPAAGMSRPLDTSLRLK	0.333333	1859.01	0.25241	4	47.088	18.949	yes
Q9NZN5	LEDYQRRLDTSSLK	0.333333	1722.89	0.37808	3	58.246	29.434	yes
Q8IV36	MGSTDSKLNFRK	0.333333	1382.7	0.073992	3	48.467	10.498	yes
P51610	VMTSGTGAPAK	0.333333	1018.51	0.43801	2;3	101.38	63.822	yes
Q96EV2	ELPIAPSHVIEMSSSR	0.333279	1751.89	0.17897	4	53.768	28.866	yes
Q9BWX5	TIAKARGSSGSTR	0.327593	1290.7	0.15395	3	71.531	22.923	yes
Q02086	SSTTTTPVQSGANVVK	0.320348	1575.81	0.25673	3	48.376	11.334	yes
Q8WXI9	SISQSISGQK	0.31922	1033.54	2.2677	3	96.866	43.654	yes
A0A087WXM9	TNSSTPGKKNR	0.317647	1188.62	1.6222	3	55.899	11.587	yes
Q9UPN6	SSEPVKETVQTTQSPTPVEK	0.314841	2171.1	0.89313	4	43.091	11.208	yes
Q5VT52	SFNYSPNSSTSEVSSTSASK	0.304555	2065.91	0.10731	3	77.062	47.985	yes
P23588	SQSSDTEQQSPTSGGGK	0.293815	1679.72	0.40446	2;4	58.796	27.509	yes
Q9H1B7	FEYPPPPVSLGSSSHTAR	0.272625	1927.94	0.12071	4	53.304	22.017	yes
Q5T5U3	SASQGALTSPSVSFSNHR	0.263806	1831.88	0.072331	4	95.666	57.249	yes
Q7KZ85	DHYQDPVPGITPSSSSR	0.246379	1841.85	0.27985	3	59.792	38.017	yes
P04792	LATQSNEITIPVTFESR	0.237828	1904.98	0.4612	3	59.339	18.843	yes
Q9NXV6	TSSEASVSSSVAK	0.235113	1238.6	1.6873	3	92.427	55.489	yes
P35658	SPGSTPTTPTSSQAPQK	0.229232	1670.81	1.2123	2;3	66.738	27.566	yes
P49790	GFDTSSSSSNSAASSSFK	0.22781	1752.74	0.33345	3	159.1	129.34	yes
Q99700	STSHTSDFNPNSGSDQR	0.227691	1835.77	0.27929	4	95.624	64.469	yes
P46013	TSDTETEPSK	0.222942	1093.48	0.12021	3	76.357	41.459	yes
O43166	ENSTFSINDAASHTSTMSSR	0.215616	2141.93	0.064451	4	68.192	30.579	yes
Q96BD5	FTPTTLPTSQNSIHPVR	0.18852	1894.99	0.060037	4	47.089	16.522	yes

## Sheet: Test 3
O-GlcNAc Proteins	O-GlcNAc Peptides	Localization prob	Mass	|Mass error [ppm]|	Charges	Score	Delta score	DFIs
P31327	AFAMTNQILVEK	1	1363.72	1.2691	2;4	120.57	10.273	yes
Q9NR12	AQPVQSKPQK	1	1109.62	0.055336	3;4	85.522	42.724	yes
P53671	ATGKVMVMKELIR	1	1474.84	0.43801	3	64.04	13.952	yes
P40939	CLAPMMSEVIRILQEGVDPK	1	2228.14	0.1658	4	43.208	9.6195	yes
Q9UK32	DRNETMNMILKAK	1	1562.79	1.7785	3	74.853	20.367	yes
Q9P286	DSLPPRVKDLHK	1	1403.79	0.16513	3	55.314	21.725	yes
P28289	EDLVPYTGEKRGK	1	1490.77	0.38619	3	47.537	10.9	yes
Q86VE0	ELAGTLR	1	758.429	1.8696	2	94.262	22.123	yes
Q96IT1	EPLENGKAKLSFQCCECGK	1	2082.95	1.2158	4	44.848	12.594	yes
P57103	GGDMSKTMYVDYK	1	1493.65	0.51265	3	43.68	16.582	yes
Q13501	GLHRGHTK	1	904.499	3.1297	2	48.561	16.527	yes
Q8TEU7	GSMVLPPCSFGK	1	1221.59	1.0091	3	51.771	13.181	yes
Q9C0E4	GSPPPTEPRR	1	1092.57	0.14193	3	52.5	11.559	yes
Q9Y6R6	KAFTLLTKLVR	1	1288.82	0.13997	3	40.727	14.653	yes
Q06455	KAHDMITTER	1	1200.59	1.2097	3	41.242	12.256	yes
Q9BZ95	KFPTAIFESK	1	1166.63	0.12983	4	40.941	16.024	yes
A8MWD9	KFSLKLNGGR	1	1118.66	0.58407	2	61.56	21.208	yes
Q9UBW7	KNPLTMENKACLR	1	1516.79	2.274	2	48.115	19.566	yes
O14497	KQAPLTYEK	1	1076.59	0.85544	3	53.775	16.226	yes
Q5VWX1	KYLDVISNKNIK	1	1433.82	2.9525	2	49.632	25.406	yes
Q8NDH6	LKMDVCQKVDLLGASR	1	1774.94	0.91488	3	42.679	18.595	yes
P49802	LMKSDSYPR	1	1095.54	1.6155	4	49.418	13.793	yes
A8MVM7	MKIAYKDTPR	1	1221.65	1.5681	2	69.03	22.151	yes
Q8NEZ4	MQNSAPRKQR	1	1214.63	0.31651	4	58.132	23.746	yes
P51606	MSKGLPAR	1	858.475	2.8681	3	42.336	14.564	yes
A6PVC2	NSFELYGADFVLGR	1	1586.77	0.39976	3	59.227	19.666	yes
Q9NZM3	NTSGWWQGELQAR	1	1531.72	1.9902	3	50.222	22.951	yes
Q5VTJ3	QNLEALKEAAYKVMSENYLQVLR	1	2709.42	0.97906	4	40.384	12.085	yes
O60502	QVAHSGAK	1	796.419	0.24209	3;4	87.713	51.289	yes
Q494X3	RIHSSEKLYDCK	1	1477.73	0.33099	3	53.567	16.751	yes
Q93034	RTLWSLVAFPK	1	1316.76	2.9521	3	40.496	14.136	yes
Q9BXG8	SAEMPTISK	1	962.474	0.50392	5	40.724	17.268	yes
P42568	SAFKEPSR	1	920.472	1.6623	3	44.614	11.351	yes
Q33E94	SALYMHYLDFCEK	1	1618.72	0.41116	3	54.023	10.333	yes
Q15036	SGGSIRKMLR	1	1103.62	0.94065	3	47.187	17.214	yes
Q8N815	SVSYQAVEILERFMVKQAENICR	1	2712.37	2.8436	5	42.639	22.343	yes
P29353	VEGGQLGGEEWTR	1	1416.66	0.42545	2	45.438	9.1453	yes
Q9NQV7	VNPGNTGKLFVGVGISR	1	1713.95	3.8441	4	44.312	11.854	yes
Q8NDV3	YSQNELEMIKK	1	1381.69	2.7642	3	47.844	9.849	yes
O75147	DGQKVEESELLVVK	1	1571.84	1.3163	3	53.565	10.248	yes
P10243	DGSLNDGGNMALK	1	1290.59	0.15395	3	62.357	15.467	yes
Q9UKU6	DKWKILNTR	1	1172.67	2.1015	3	67.385	26.909	yes
Q6P3R8	ESKNPEQKYK	1	1249.63	0.5975	5	60.398	28.069	yes
Q96MX3	GHLVLTPFGIGDGRARPLK	1	2003.14	0.50507	3	56.339	22.148	yes
Q9H2S6	KIYMEIDPVTR	1	1363.72	0.69723	3	50.46	9.3506	yes
P22626	LTDCVVMRDPASK	1	1433.7	0.37475	3	43.794	13.655	yes
Q30201	MGPRARPALLLLMLLQTAVLQGR	1	2517.48	5.4377	3	51.566	25.58	yes
Q9NZL9	MLDPSIK	1	802.426	0.83825	3	51.346	17.47	yes
Q15032	NLKPAVTK	1	869.533	3.8156	4	44.639	9.4612	yes
Q14C86	NLMAQLQETMR	1	1333.65	3.7261	3	63.624	17.214	yes
Q6NUK1	SDKMNIFGGFR	1	1270.61	0.5975	5	42.336	12.592	yes
Q15326	SEMEEEKR	1	1036.45	1.0826	3	63.216	21.34	yes
Q5KSL6	SGDHQGIVFLRK	1	1355.73	0.82613	4	51.727	8.1795	yes
Q99490	SRGAGALQR	1	914.505	5.498	2	74.464	11.046	yes
Q9Y3U8	VTKNVSKPR	1	1027.61	0.57162	3;4	64.224	29.574	yes
Q9ULL0	SKFQPQMSSK	0.999986	1166.58	5.6298	3	72.2	32.576	yes
O00566	DKALKSSQAFFSK	0.999978	1455.77	1.8602	4	55.261	18.81	yes
Q9Y2U8	NSPPNSLTPCLK	0.999963	1269.64	0.10554	3	46.796	20.978	yes
Q9Y2Y4	RFSLKHQMETHYR	0.999943	1731.86	1.7546	3	61.48	25.049	yes
Q99835	SNHPGLLSEKAASK	0.999928	1437.76	0.70561	4	47.726	10.684	yes
Q8WXI3	SHLEGSLPQALPR	0.999925	1403.75	1.8088	2;3	59.198	16.481	yes
Q12789	SDNKMGITPLR	0.999903	1230.64	0.62571	2	57.149	10.742	yes
Q9H5L6	HHSERTDMK	0.999891	1139.51	0.055336	2	72.607	23.264	yes
Q9NR48	KLMSCPLAGLISK	0.999867	1359.76	2.1801	3	59.116	26.117	yes
Q9BX69	DSILSHKVLDEDSK	0.999863	1584.8	0.69848	4	54.343	18.216	yes
P58876	MPEPTKSAPAPK	0.999842	1252.65	0.65034	3	52.247	9.5393	yes
Q9NQL9	ISIPDDGCPFVSK	0.999815	1376.66	0.055336	3	58.172	22.515	yes
Q96RT1	TMNRLTQLER	0.999751	1260.66	3.568	3	55.721	13.725	yes
Q66GS9	SPDVLSLESRNK	0.99975	1343.7	0.24266	4	49.988	17.292	yes
P61371	CSIGFSK	0.999567	740.353	0.56938	2	68.787	17.982	yes
Q5XX13	EKEEEKEENSLMEILSK	0.999446	2063.99	3.8924	3	53.981	17.396	yes
P48443	GLSNPSEVETLR	0.999439	1300.66	0.075057	3	62.813	18.472	yes
Q86T96	QSFQKSNSAKWPLPSCR	0.999374	1962.97	1.2	3	71.98	27.355	yes
Q9HCI5	MSLVSQNSRR	0.999372	1176.6	0.12881	3	41.242	8.1536	yes
Q9HC44	LTRRTTDR	0.999259	1017.57	0.015679	3	60.478	29.994	yes
Q8WWL7	ESFSQEPSALQKK	0.999117	1477.74	1.7184	3	54.65	20.476	yes
Q9H8H0	ESTSCPVVQK	0.998892	1076.52	2.482	3	56.013	15.772	yes
Q9UL36	HSRIHTGERPFHCTLCEK	0.998685	2150.03	1.6071	4	40.857	8.6661	yes
O00410	ENVNATENCISAVGKIMK	0.998637	1919.94	1.8554	3	55.011	22.757	yes
Q8NDZ0	QFFHLSLPSSWDDRR	0.998345	1889.92	0.094872	4	50.897	21.621	yes
Q6IE81	MEPITKVSHIPSSR	0.998119	1580.83	3.1655	3	51.463	10.988	yes
P27816	ASPSKPASAPASR	0.998087	1225.64	0.24998	3;4	123.76	69.482	yes
Q9GZN7	MATVMAATAAER	0.99804	1221.58	2.6039	3	52.391	17.695	yes
Q6P6B7	ATSTHLTALHYAAK	0.99802	1483.78	0.5975	3;4	70.089	10.784	yes
Q9BSH4	MSAWAAASLSR	0.997618	1149.56	2.2066	3	48.998	10.216	yes
Q8TEA7	ESINLFCWTPK	0.997022	1336.65	1.0091	3	56.956	16.678	yes
Q8WWL7	ITSEEESFYKK	0.99631	1359.66	0.16691	4	45.28	10.18	yes
Q96QE3	TGDEESKARDK	0.996244	1234.58	1.3391	2	54.343	10.841	yes
Q9HBL8	LVVVFGGTGAQGGSVAR	0.995278	1573.86	0.42808	3	49.216	11.218	yes
Q8IXZ2	ASFPSSALPPR	0.994504	1128.59	0.11257	4	44.425	12.717	yes
Q9P2H0	SPVCEESYPSVTLR	0.994215	1565.74	0.39883	3	66.989	34.694	yes
Q9UBT6	DKPIAVGSMSMLSTSNYHARR	0.994161	2320.14	0.059877	3	53.504	8.9649	yes
P35658	SHLVHGSSPGVMGTSVATSASK	0.994009	2096.03	0.26788	2;3;4	181.61	103.3	yes
Q86T24	RSYVCLTSLR	0.993811	1196.63	0.58892	3	44.132	16.701	yes
O75064	SAFNKLASSMGK	0.993666	1239.63	0.74364	3	47.991	12.519	yes
Q8TBB5	STGGPSGR	0.993018	717.341	1.8257	3	47.574	17.007	yes
Q86T82	LMLTLQDNSFLSIDK	0.992131	1736.9	5.0145	4	40.941	10.366	yes
A2A3N6	ASEVPYASGMPIKK	0.991838	1476.76	1.6222	2	48.277	9.3169	yes
P50607	RTKAAATAGGQGGAAR	0.991648	1442.77	0.25357	2	47.037	13.772	yes
Q5T890	LPSHNKKNSTFIPR	0.991369	1637.9	0.70707	3	42.785	10.664	yes
P22033	NTYIFPPEPSMK	0.991229	1422.69	0.19404	2	45.653	9.9756	yes
Q9BYI3	ASLPHGPMKSNK	0.99115	1265.65	1.7689	2	43.03	13.486	yes
Q14814	SPPPPTHSTQLGAPSR	0.990925	1628.83	0.14088	4	65.956	65.956	yes
Q8WTR2	MYSLNQEIKAFSR	0.990764	1585.79	0.73249	3	42.843	12.771	yes
Q9H410	MTSVTRSEIIDEK	0.990227	1507.76	0.30581	3	59.975	28.301	yes
P0CF97	SADKLKTIPNDNTVSLR	0.989835	1871.01	0.063291	3	49.595	15.2	yes
Q9HCE3	GSPSSPAGSTPAIPK	0.989784	1352.69	0.094872	3	43.761	17.915	yes
O43491	KDSSQLGTDATK	0.988891	1249.62	5.2638	3	57.225	18.046	yes
P51610	TAAAQVGTSVSSATNTSTRPIITVHK	0.987715	2597.38	0.99082	4;6	77.43	45.513	yes
Q8TC07	KDPYTATMIGFSK	0.986989	1457.72	2.444	2	48.729	17.007	yes
P11532	SLSEVKSEVEMVIK	0.985978	1576.84	3.1294	4	41.912	10.031	yes
Q8WZ42	DAAYPPGPPSNPHVTDTTK	0.985911	1963.93	0.63688	3	42.059	13.228	yes
Q9NVR7	TFSFYKLETWLR	0.985758	1589.82	0.97345	3	57.885	17.508	yes
Q08495	SPGIISQASAPR	0.984776	1182.64	0.56718	4	58.817	8.7767	yes
O43242	MLPSTSRR	0.981674	946.502	0.4695	3	52.247	26.129	yes
Q13427	EKSKQLESK	0.980825	1075.59	0.81728	3	64.73	8.1791	yes
Q9UKT5	TFWQSVSKER	0.978986	1266.64	1.3913	3	78.287	26.268	yes
Q6PDB4	IYSSVKSHILNKYR	0.978402	1706.95	0.14017	4	67.519	31.312	yes
Q9P270	FRSPAAPSPLALRQPVK	0.978171	1834.06	0.9405	4	45.54	18.799	yes
Q96PE3	GPSFKASSLK	0.976646	1020.56	5.878	2	58.699	23.157	yes
P51610	HSHAVSTAAMTR	0.974725	1267.61	1.8703	2;3;4	95.554	63.402	yes
P17097	AFSQSSSLIYHQR	0.970983	1522.75	0.16417	3	48.391	19.981	yes
Q9H089	KVSVSATPGHTK	0.97077	1210.67	1.1376	4	45.661	17.747	yes
Q7Z460	LCEIFTRMFADPHSK	0.970625	1793.86	0.11153	4	66.022	17.745	yes
O75376	SAAVSEQQQLEQK	0.965707	1444.72	0.35901	3	161.26	161.26	yes
P40818	ELYTMMTDK	0.963484	1130.5	0.32408	3	47.302	10.729	yes
P49454	KEMSSIISLNKR	0.960796	1404.78	0.87965	3	47.971	8.9658	yes
Q96KR1	AGYSQGATQYTQAQQTR	0.96079	1857.86	0.58263	2;3;4;5	175.7	142.96	yes
O60682	LKTSLPWVPPDTKLSK	0.960223	1809.04	0.054343	4	45.347	21.318	yes
O43768	YPSLGQKPGGSDFLMKR	0.958787	1879.96	0.24209	3	54.103	19.265	yes
Q86UR5	ISSFTPKMQGR	0.942471	1250.64	0.30719	3	42.426	14.846	yes
Q03001	TIIQLKPRNSDCPLK	0.94171	1724.96	0.55046	4	56.746	21.875	yes
Q6N021	SAPSRTKQTENASQAK	0.941578	1702.86	0.5975	3	47.639	10.114	yes
Q99698	DKAASESIRVNR	0.940892	1344.71	0.24998	3	55.335	18.739	yes
Q9NV35	MTASAQPR	0.940861	860.417	0.28132	2	43.651	18.875	yes
P51610	ISVATGALEAAQGSK	0.939594	1401.75	0.19786	3;4	167.97	113.69	yes
Q8N103	HQSFTTKTEKGKPSR	0.933791	1730.91	1.393	4	53.504	24.9	yes
O60783	AAFMLGSLLRTFK	0.933381	1453.81	0.31473	2	44.612	11.695	yes
Q9P2I0	SQVEWMSDKLMR	0.929494	1508.71	1.9894	3	63.185	28.79	yes
Q8IZD2	DATASEK	0.928717	720.329	0.43067	2	104.75	27.006	yes
Q12981	SMSGTIQLGR	0.912191	1048.53	1.4107	2	60.398	15.786	yes
P07814	THVADFAPEVAWVTRSGK	0.909743	1970	1.4591	3	43.696	14.373	yes
Q9Y520	ESVTDYTTPSSSLPNTVATNNTK	0.9074	2426.14	0.45952	2;3;4	139.95	69.487	yes
Q9NYV4	TSAVSSQANSQPPVQVSVK	0.904832	1912.99	0.081794	3;4;5	86.084	53.128	yes
Q6N021	AAAEKLSSLENSSNKNEK	0.902904	1918.96	0.18759	3	55.975	9.6231	yes
Q14315	TERTEISKTR	0.901383	1219.65	2.3103	2	54.066	12.824	yes
Q16543	SMVNTKPEKTEEDSEEVR	0.899172	2106.97	1.9794	4	46.156	13.79	yes
Q9NVP4	MTAGSVCVPQIIPLR	0.893768	1583.85	0.45983	2	41.996	8.4068	yes
Q7Z3J3	EGFSIPVSADGFK	0.889833	1352.66	0.0046228	3	112.24	75.291	yes
Q93052	STGEPLGHVPAR	0.887721	1219.63	0.55457	2;3;4	132.56	76.81	yes
Q9NSC2	GQPSRPTKSK	0.887148	1084.6	0.82682	3	44.968	10.762	yes
Q9UJF2	FQTITILPMEQYK	0.884534	1610.84	1.7785	3	42.843	12.535	yes
A8CG34	APPTLQAETATKPQATSAPSPAPK	0.884201	2359.24	0.33186	5	55.705	29.658	yes
Q86YV0	ALSHQEPMVSTQPAPRSIFRR	0.876356	2407.25	0.073992	4	41.513	17.649	yes
A6NCS4	MLLSPVTSTPFSVK	0.873891	1505.82	0.0046228	3	42.947	16.11	yes
Q8IVM0	TAKAANSKSK	0.872157	1004.56	0.96285	2	56.205	13.487	yes
Q7Z309	KGEMETESQPK	0.86769	1262.58	0.017536	2	53.448	12.048	yes
O95628	SNPVIPISSSNHSAR	0.86389	1564.8	0.83438	4	86.453	52.903	yes
P35658	ASSTSLTSTQPTK	0.862169	1307.66	0.0061482	3;4	165.89	122.28	yes
Q8N3D4	SGGREANTKR	0.860035	1074.55	2.2029	5	46.063	14.914	yes
Q15648	SPSHSSSNRPFTPPTSTGGSK	0.856063	2115	2.1507	5	47.729	20.979	yes
Q01082	HEVSASTQSTPASSR	0.852668	1543.72	0.074766	2;3;4	127.88	90.074	yes
Q5T6F2	GGYAGSSQAPNK	0.838882	1135.53	0.038144	3	62.077	32.31	yes
Q8N3V7	AASPAKPSSLDLVPNLPK	0.837483	1804.01	0.090046	3	57.288	27.045	yes
Q13769	MSSESSK	0.837238	754.317	2.4864	3	50.12	12.474	yes
P30622	KVQAEDEANGLQTTPASR	0.829983	1913.94	0.3237	2;3;4	86.073	50.417	yes
Q09472	MESTETEERSTELK	0.825809	1668.75	0.42599	4	45.28	13.791	yes
Q9UHR5	GTTTNATSTTTTTASTAVADAQK	0.822658	2199.05	0.38417	4	77.917	81.491	yes
Q9BZE2	QTSAFVEGVKMR	0.819415	1351.69	0.045159	3	53.448	17.031	yes
Q96HC4	EVVKPVPITSPAVSK	0.818521	1549.91	0.16701	2;3;4	113.23	88.778	yes
Q6ZQQ6	LMALRISGSQTK	0.817215	1303.73	0.23022	3	61.409	16.87	yes
Q5MJ08	MKSPCESNKR	0.80482	1178.55	0.08746	2	56.087	16.465	yes
Q9NXG0	TTMTKVK	0.80444	807.452	0.7361	2	57.859	17.59	yes
Q99623	KISSPTGSK	0.80407	903.503	0.17846	3	42.864	10.712	yes
Q96Q89	KIIETMSSSKLSNVEASK	0.801887	1951.03	1.3391	4	40.857	9.768	yes
Q6P0N0	TPQCQHVSPGMLGSINR	0.79785	1823.88	4.4349	4	61.096	19.696	yes
P51587	QTENLKTSK	0.796581	1047.56	0.25357	2	61.344	8.9532	yes
P52594	SSSADFGTFNTSQSHQTASAVSK	0.793178	2344.06	0.0046228	3;4	137.26	97.964	yes
Q9Y2Z2	RQSAMNESSK	0.793107	1136.52	0.53074	3	40.727	10.419	yes
P05388	AFLADPSAFVAAAPVAAATTAAPAAAAAPAK	0.792531	2751.46	5.1572	3;4	97.295	23.462	yes
O60318	SPTSVGAFPSTSAFGQEAGEIVNSGFGK	0.791261	2728.3	0.24209	4	50.627	17.912	yes
O15047	GSTPYSQDSAYSSSTTSTSFKPR	0.790173	2441.1	0.025542	4	109.71	75.28	yes
Q8N8S7	GSTIETEQKEDKGEDSEPVTSK	0.786443	2393.11	0.1109	4;5	84.312	55.369	yes
Q9NPG3	TPASSSSALSHPAKPHSVSSAGSSYK	0.786234	2527.23	0.45983	6	44.474	22.377	yes
Q6ZRS2	AETQGANHTPVISAHQTR	0.768206	1916.95	0.041895	4;5	78.419	42.448	yes
Q92930	KMNDSNSAGAGGPVK	0.765048	1431.68	2.3972	3	46.704	16.373	yes
Q5HYW2	KSSLPPTSPMEK	0.763378	1300.67	0.25483	3	54.772	16.804	yes
A8MXQ7	EAEAERMTLKVQQLTR	0.763263	1902	0.4245	3	49.216	14.365	yes
Q7Z739	IGGDLTAAVTK	0.762883	1044.58	0.6967	3	77.633	31.57	yes
P17544	SAAEAVATSVLTQMASQR	0.757409	1819.91	0.81205	3;4	119.43	83.667	yes
Q9Y263	TSGATRYR	0.755121	910.462	1.2158	3	49.3	11.751	yes
Q68DX3	MQPLTKDAGMSLSSVTLASALQVR	0.754877	2503.31	0.55371	3	42.908	12.333	yes
O75376	SSSGYPPNQGAFSTEQSR	0.750683	1898.84	0.14088	3	61.477	34.215	yes
Q9NX95	SSLADKDK	0.749413	862.44	0.52369	3	66.351	14.823	yes
Q4VXU2	EFSPYGVITSAK	0.745201	1297.66	0.11941	4	53.377	12.151	yes
O15090	GSGSDQESQSVSR	0.744813	1322.57	0.39929	3	77.192	45.595	yes
Q8N3X1	ATEISTAVVQR	0.740388	1173.64	0.090046	3	98	54.581	yes
Q8N392	TGTTRIGDLAPQDMKK	0.737473	1730.9	0.86345	3	47.774	8.7962	yes
Q7Z3T8	STIPVQQGLPTSK	0.735947	1354.75	0.70838	3	74.726	41.323	yes
Q6P4R8	ASSASAPSSTPTGTTVVK	0.722761	1647.83	1.3391	3	89.47	53.019	yes
Q14157	SPAVATSTAAPPPPSSPLPSK	0.693973	1959.03	0.12021	2;3;4	186.74	112.16	yes
Q14247	NASTFEDVTQVSSAYQK	0.690122	1873.87	0.117	3	117.22	88.937	yes
P48382	TAEVPVSEASGQAPPAK	0.689685	1637.83	0.1862	3;4	74.657	44.131	yes
O15047	QDTPSSFGQFTPQSSQGTPYTSR	0.688544	2503.13	0.064451	4	47.472	15.187	yes
P12270	GIASTSDPPTANIKPTPVVSTPSK	0.688353	2364.25	0.21904	3;4	85.224	57.552	yes
Q16186	SQSAAVTPSSTTSSTR	0.685772	1566.75	0.04512	2;3	179.55	95.26	yes
Q6P4R8	IQTVPASHLQQGTASGSSK	0.680293	1895.97	4.2683	3;4	78.531	37.878	yes
Q9BYJ9	IGDVSSSAVK	0.677351	961.508	0.13997	2;3	86.803	29.628	yes
P35658	NNPATPSTAMGSSVPYSTAK	0.674979	1979.93	0.076043	2;3;4	139.2	95.694	yes
Q9UKV8	KLTDNQTSTMIRATAR	0.670658	1805.94	2.1823	3	46.66	17.792	yes
Q8WWM7	STSTPTSPGPR	0.667369	1086.53	1.6031	3	63.694	35.613	yes
Q15750	VYPVSVPYSSAQSTSK	0.665222	1698.85	0.37174	3	95.429	48.908	yes
P30305	KSEAGSGAASSSGEDK	0.664161	1466.65	1.5955	2	44.44	16.914	yes
A8MXT2	ASYPSSPASAVSLTSSDEGAKGQK	0.663248	2324.11	4.7289	3	53.957	53.957	yes
O14727	CCSWSADGARIMVAAKNK	0.662365	1909.9	0.25241	3	45.873	14.379	yes
Q15942	VSSGYVPPPVATPFSSK	0.662316	1718.89	0.31933	4	90.765	62.999	yes
Q86U70	SENPTSQASQ	0.66127	1047.45	1.4417	2	101.38	65.935	yes
Q5VT52	SAVSTSVPTKPTENISK	0.659144	1744.92	0.18601	5	68.406	39.043	yes
Q9BTC0	VLSSLKPAAPSPATAATTAAAASTAASSTASSASK	0.642332	3102.6	0.15395	4;5	63.305	45.9	yes
P45974	MFKALIGKGHPEFSTNR	0.64174	1932	0.62963	4	48.351	18.623	yes
P49790	IGVSSDSGSINPMSEGFK	0.635471	1810.84	0.048199	3;4	82.761	51.816	yes
Q6ZSR3	MGWRFPSPSPR	0.632075	1316.64	0.017536	3	56.548	13.705	yes
Q9Y2M0	TNLTPGQSDSAKR	0.629399	1373.69	1.0794	3	40.493	9.6353	yes
Q9H7H1	LSLGVAETAAVMSLLTRT	0.627335	1832.01	0.63225	4	47.64	22.097	yes
O94842	GLQLGQTSTATIQPSQQAQIVTR	0.618559	2425.29	0.074271	2;3;4	134.8	78.624	yes
O75376	SSHLEVSQASQLLQQQQQQQLR	0.61837	2563.31	0.35901	4	105.52	69.087	yes
Q9UQR0	NPMYIHTSVSQDFSR	0.613517	1780.82	0.30122	3;4	67.644	32.896	yes
P51610	SGTVTVAQQAQVVTTVVGGVTK	0.606573	2129.17	0.49427	3;4	65.495	42.173	yes
Q8N7Q3	ASNSSSKLMEHK	0.597985	1317.63	0.69723	3	57.267	12.725	yes
Q02790	KIVSWLEYESSFSNEEAQK	0.59605	2273.09	0.91488	4	50.188	20.049	yes
Q9ULH7	VSESPSPVTTNTPAQFASVSPTVPEFLK	0.592115	2916.48	1.3404	4	65.056	39.635	yes
Q13620	MAEESSSSSSSSSPTAATSQQQQLK	0.583416	2543.13	0.30731	3;4	114.92	83.512	yes
Q9NXV6	SSSSTNTSLLTSK	0.583016	1311.65	0.070557	3	129.36	87.82	yes
P49790	FGVSSSSSGPSQTLTSTGNFK	0.573186	2074.98	#VALUE!	3;4;5	131.26	101.54	yes
Q12830	GQPVSTAVSAPNTVSSTPGQK	0.568977	2012.02	0.025551	2;3;4;5	97.388	64.858	yes
Q09666	GPQVSSALNLDTSK	0.563344	1415.73	0.43275	3	151.41	123.25	yes
Q9Y618	GSPVTTREPTPR	0.562983	1296.68	0.61058	4	55.98	21.059	yes
Q13029	MQSMQTPLGKTRAR	0.55828	1603.83	1.1917	3	52.172	16.681	yes
Q5VT52	SLFSPQNTLAAPTGHPPTSGVEK	0.558218	2335.18	0.43925	4	85.881	62.116	yes
Q12830	VMVAPISGSVTTGTK	0.557889	1446.78	0.34765	3	88.637	43.279	yes
O75179	IGSSAPTTTAANTSLMGIK	0.551662	1819.93	0.20987	4	61.141	25.214	yes
P04150	VSASSPSLAVASQSDSK	0.550169	1619.8	0.073992	3;4	114.87	73.759	yes
P18846	TTPSATSLPQTVVMTSPVTLTSQTTK	0.540977	2676.39	1.3667	4	62.678	41.756	yes
Q9Y6R0	SRSAAASGGPRRPER	0.537206	1553.81	1.0932	4	52.365	15.194	yes
Q14004	TENQHVPTTSSSLTDPHAGVK	0.535176	2205.07	0.074951	5	85.737	57.382	yes
P49790	STEANVLPPSSIGFTFSVPVAK	0.533638	2247.18	0.24169	4	45.137	15.91	yes
Q96KR1	STAPAVAYDSK	0.532917	1108.54	0.18759	3	98.253	69.182	yes
P02545	ASASGSGAQVGGPISSGSSASSVTVTR	0.532075	2364.15	0.017536	2;3;4	106.33	54.752	yes
Q6MZP7	TITISESGVIGSTLNSTTQTPNK	0.529269	2348.21	0.18759	4	91.964	38.956	yes
Q14157	QAFTPSSTMMEVFLQEK	0.519136	1972.93	0.44211	3;4	109.44	72.451	yes
Q9P013	EHTTSSSVSKKPR	0.509172	1442.75	0.58635	4	42.843	12.637	yes
Q9Y2K1	AVLAACSSYFR	0.5	1186.58	1.5292	2	56.404	23.546	yes
O60518	CANSKTKK	0.5	878.464	0.10221	2	75.109	38.552	yes
Q15942	GPPASSPAPAPK	0.5	1075.57	0.31933	3	69.258	36.445	yes
Q14814	VITSQAGK	0.5	802.455	0.058716	2	71.153	31.28	yes
Q562F6	KVNKMTSK	0.5	934.527	1.7494	2	69.198	21.282	yes
Q6ZS92	CMNTSIHAHTYAR	0.498996	1503.67	0.84893	3	40.475	14.493	yes
P27540	HSNPTQGATPTWTPTTR	0.47822	1851.89	0.65097	2;4	106.73	54.004	yes
Q9ULE0	SLDTPQSLASLSSR	0.476019	1460.75	0.89313	3	63.462	33.525	yes
Q6P4R8	SGPSTVSEPAK	0.475955	1058.52	0.2865	3	76.868	38.154	yes
Q8WWI1	TSTTGVATTQSPTPR	0.4727	1503.75	0.097973	3	95.554	68.529	yes
Q04726	NDAPTPGTSTTPGLR	0.466616	1483.73	0.59773	3	92.679	56.828	yes
Q7Z589	TITVPVSGSPK	0.46456	1084.61	0.87715	2;3	79.089	43.378	yes
Q08AH1	TLDPMVIFFTSGTTGFPK	0.463946	1957.99	0.37385	3	51.524	18.822	yes
P39880	QAPLSQSDITILTPK	0.459616	1610.89	1.1352	3	64.89	13.423	yes
Q9HCX3	SCTVHMLGRSFTCR	0.455784	1596.73	0.12881	3	53.565	28.655	yes
Q6UN15	ETALPSTK	0.455753	845.449	0.2865	3	71.221	12.629	yes
P46821	ETKNAANASASK	0.449743	1190.59	0.086097	2	57.794	19.011	yes
P51610	SPITIITTK	0.446396	972.586	0.061601	3	107.97	62.368	yes
Q9C073	RSASWGSTDHR	0.444256	1258.58	1.4596	3	57.267	17.419	yes
P51610	IPPSSAPTVLSVPAGTTIVK	0.443646	1934.11	1.8703	4	59.912	36.592	yes
Q9UHD9	SQNRPQGQSTQPSNAAGTNTTSASTPR	0.441922	2743.29	0.14952	3;4	123.71	16.486	yes
P49790	QQEPVTSTSLVFGK	0.441328	1519.79	0.33345	3	174.59	122.09	yes
P11532	IQSDLTSHEISLEEMKK	0.431294	1986.99	2.464	4	44.252	13.163	yes
Q9Y3E2	TPAQWRENSQLDTSPPCLGGNKK	0.431095	2526.23	0.5731	4	42.639	9.798	yes
Q5T6F2	GVSVSSSTTGLPDMTGSVYNK	0.429569	2085.99	0.10354	3;4	128.51	91.775	yes
Q9UPN3	ATSSETKESTDIEK	0.428858	1524.72	0.97485	3	41.996	11.811	yes
Q96T58	VNTSEGVVLLSYSGQK	0.426171	1679.87	2.994	3	79.467	45.214	yes
Q5JSZ5	GGLPVSQSQEIFSSLQPFR	0.421183	2076.06	0.072397	3	78.272	41.528	yes
P51610	TMAVTPGTTTLPATVK	0.420114	1587.85	0.091329	3;4	85.166	46.989	yes
Q9UKD1	VVSTLPSTVLGK	0.419441	1199.71	0.025926	3	86.539	31.668	yes
Q7LBC6	VEHSPFSSFASQASGSSSSATTVTSK	0.417277	2573.19	0.27985	4	86.095	62.195	yes
Q96HC4	ANNSQEPSPQLASSVASTR	0.412665	1942.93	0.21619	2;3;4	147.84	83.772	yes
Q6UVJ0	KQDVLGPSTTPPAHSSSNTIR	0.404588	2192.12	0.074766	4;5	63.823	30.106	yes
Q96Q06	GTVQTSVDTTK	0.401858	1135.57	0.83438	3	86.498	41.886	yes
Q9NZM3	AQSLIDLGSSSSTSSTASLSGNSPK	0.401638	2381.16	0.48285	4	59.219	28.751	yes
P04150	SSASTAVSAAPTEK	0.401216	1305.64	0.62448	3	59.225	26.971	yes
P85037	EPAAAVAATATTTPATATTASASASSTGEPEVK	0.398869	3017.47	0.075331	4	89.751	65.399	yes
Q8TB72	SESGGLGVSMVEYVLSSSPADK	0.396198	2198.04	0.73149	4	76.606	42.185	yes
Q8WX93	TTSVSLTIGSSSPK	0.395734	1363.72	1.2249	2;3	108.36	43.184	yes
Q9UHR5	KGTTTNATSTTTTTASTAVADAQK	0.393171	2327.15	0.11225	4;5	112.35	81.491	yes
Q96L91	TQFLTTPISQAQK	0.388857	1461.78	1.5999	3	64.298	22.46	yes
P40692	STTSLTSSSTSGSSDK	0.378401	1531.68	0.1658	3	95.365	58.188	yes
O00268	QVSQAQTTVQPSATLQR	0.370077	1841.96	0.42599	3	127.07	95.471	yes
P23588	TGSESSQTGTSTTSSR	0.367498	1572.69	0.51401	2;3	201.04	21.068	yes
Q7Z589	IISSNIVSGTTTK	0.366152	1319.73	0.15219	3	89.502	50.733	yes
Q8IVL1	SSKIASFIPKGGK	0.355955	1318.76	0.073992	2	55.261	16.082	yes
Q7Z478	YSSRTQHAILYMNPHK	0.351608	1944.96	1.4538	4	47.774	11.965	yes
Q9C0D5	MSSSTSSLTSSSSFSDGFK	0.344812	1928.83	0.3525	3	61.111	35.569	yes
P52594	APVGSVVSVPSQSSASSDK	0.34368	1787.89	0.26699	2;4	70.615	29.504	yes
O14543	FPAAGMSRPLDTSLRLK	0.333333	1859.01	0.25241	4	47.088	18.949	yes
Q9NZN5	LEDYQRRLDTSSLK	0.333333	1722.89	0.37808	3	58.246	29.434	yes
Q8IV36	MGSTDSKLNFRK	0.333333	1382.7	0.073992	3	48.467	10.498	yes
P51610	VMTSGTGAPAK	0.333333	1018.51	0.43801	2;3	101.38	63.822	yes
Q96EV2	ELPIAPSHVIEMSSSR	0.333279	1751.89	0.17897	4	53.768	28.866	yes
Q02086	SSTTTTPVQSGANVVK	0.320348	1575.81	0.25673	3	48.376	11.334	yes
Q8WXI9	SISQSISGQK	0.31922	1033.54	2.2677	3	96.866	43.654	yes
A0A087WXM9	TNSSTPGKKNR	0.317647	1188.62	1.6222	3	55.899	11.587	yes
Q9UPN6	SSEPVKETVQTTQSPTPVEK	0.314841	2171.1	0.89313	4	43.091	11.208	yes
Q5VT52	SFNYSPNSSTSEVSSTSASK	0.304555	2065.91	0.10731	3	77.062	47.985	yes
P23588	SQSSDTEQQSPTSGGGK	0.293815	1679.72	0.40446	2;4	58.796	27.509	yes
Q9H1B7	FEYPPPPVSLGSSSHTAR	0.272625	1927.94	0.12071	4	53.304	22.017	yes
Q5T5U3	SASQGALTSPSVSFSNHR	0.263806	1831.88	0.072331	4	95.666	57.249	yes
Q7KZ85	DHYQDPVPGITPSSSSR	0.246379	1841.85	0.27985	3	59.792	38.017	yes
P04792	LATQSNEITIPVTFESR	0.237828	1904.98	0.4612	3	59.339	18.843	yes
Q9NXV6	TSSEASVSSSVAK	0.235113	1238.6	1.6873	3	92.427	55.489	yes
P35658	SPGSTPTTPTSSQAPQK	0.229232	1670.81	1.2123	2;3	66.738	27.566	yes
P49790	GFDTSSSSSNSAASSSFK	0.22781	1752.74	0.33345	3	159.1	129.34	yes
Q99700	STSHTSDFNPNSGSDQR	0.227691	1835.77	0.27929	4	95.624	64.469	yes
P46013	TSDTETEPSK	0.222942	1093.48	0.12021	3	76.357	41.459	yes
O43166	ENSTFSINDAASHTSTMSSR	0.215616	2141.93	0.064451	4	68.192	30.579	yes
Q96BD5	FTPTTLPTSQNSIHPVR	0.18852	1894.99	0.060037	4	47.089	16.522	yes
P51003	EQLDTETSTTQSETIQTAASLLASQK	0.139031	2780.36	0.25357	4	44.708	15.631	yes
